# Supplementary material for: The bulky side chain of antillatoxin is important for potent toxicity: rational design of photoresponsive cytotoxins based on SAR studies
Source: Royal Society of Chemistry journal article supplement (doi:10.1039/c3cc44066d), 2013-01-01
Supplement: c3cc44066d.pdf [file c3cc44066d.pdf]

## Supporting Information

### **The Bulky Side Chain of Antillatoxin is Important for Potent Toxicity: Rational Design of Photoresponsive Cytotoxins Based on SAR Study**

Ken Okura, Shigeru Matsuoka and Masayuki Inoue\*

*Graduate School of Pharmaceutical Sciences, The University of Tokyo,*

*Hongo, Bunkyo-ku, Tokyo 113-0033, Japan*

E-mail: inoue@mol.f.u-tokyo.ac.jp

67 pages

Contents:

S2-S17: Experimental

S18-S67:  $^1\text{H}$  and  $^{13}\text{C}$  NMR spectra of newly synthesized compounds

**General Methods.**  $^1\text{H}$  and  $^{13}\text{C}$  NMR spectra were recorded on a Varian INOVA 500 (500 MHz for  $^1\text{H}$  NMR, 125 MHz for  $^{13}\text{C}$  NMR) spectrometer, a JEOL ECX 500 (500 MHz for  $^1\text{H}$  NMR, 125 MHz for  $^{13}\text{C}$  NMR) spectrometer or a JEOL ECA 500 (500 MHz for  $^1\text{H}$  NMR, 125 MHz for  $^{13}\text{C}$  NMR) spectrometer. Chemical shifts are denoted in  $\delta$ (ppm) relative to residual solvent peaks as internal standard ( $\text{CDCl}_3$ ,  $^1\text{H}$   $\delta$  7.26,  $^{13}\text{C}$   $\delta$  77.0;  $\text{CD}_3\text{OD}$ ,  $^1\text{H}$   $\delta$  3.31,  $^{13}\text{C}$   $\delta$  49.0). IR spectra were recorded on a JASCO FT/IR-410 spectrometer or a JASCO FT/IR-4100 spectrometer. Mass spectra were recorded on a PerSeptive Biosystems Mariner Biospectrometry Workstation instrument or Bruker BioTOF-Q spectrometer. Optical rotations were recorded on a JASCO P-1010 polarimeter or a JASCO P-2100 polarimeter. All reactions were monitored by TLC on MERCK TLC plates silica gel 60 F<sub>254</sub> under UV light (254 nm), and/or developed by 10% ethanolic phosphomolybdic acid or 5% (v/v) *p*-anisaldehyde solution in ethanol with 5%  $\text{H}_2\text{SO}_4$ . Flash column chromatography was performed using MERCK Silica gel 60 particle size 0.040-0.063 mm (230-400 mesh ASTM). Dry hexane and toluene were dried over  $\text{MS4}\text{\AA}$ . Dry DMF, pyridine and DMSO were distilled over  $\text{CaH}_2$ .

The atom numbering of compounds is shown below.

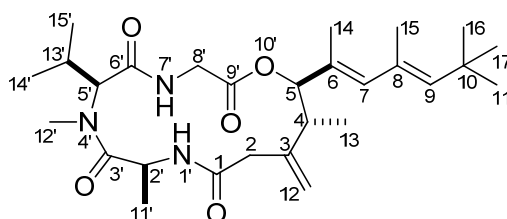

antillatoxin (**1a**)

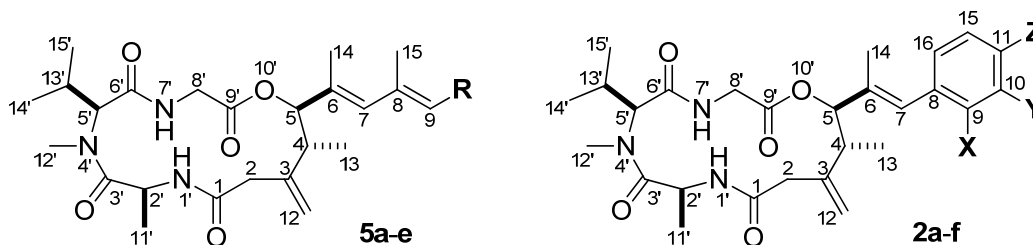

**Antillatoxin (1a).**<sup>S 1</sup> To a mixture of **3** (48.6 mg, 91.1  $\mu\text{mol}$ ) and (Z)-2-(4,4-dimethylpent-2-en-2-yl)-4,4,5,5-tetramethyl-1,3,2-dioxaborolane (81.7 mg, 364  $\mu\text{mol}$ ) were added dry THF (300  $\mu\text{L}$ ),  $\text{PdCl}_2(\text{dppf})\cdot\text{CH}_2\text{Cl}_2$  (18.6 mg, 22.8  $\mu\text{mol}$ ),  $\text{Cs}_2\text{CO}_3$  (119 mg, 364  $\mu\text{mol}$ ) and  $\text{Ph}_3\text{As}$  (14.0 mg, 45.6  $\mu\text{mol}$ ) at room temperature. The reaction mixture was stirred at room temperature for 24 h and filtrated through a pad of Celite with  $\text{Et}_2\text{O}$ . The filtrate was concentrated. The residue was purified with flash column chromatography (hexane/AcOEt = 3/1 to 1.5/1) and HPLC (column: Inertsil ODS-3  $\phi 10 \times 250$  mm, flow rate: 2 mL/min, detection: UV 210 nm, eluent: MeOH/ $\text{H}_2\text{O}$  = 4/1,  $T_R$  = 25.2 min) to give 35.7 mg of **1** (78%): colorless solid;  $[\alpha]_D^{26.7} = -163^\circ$  ( $c$  0.55, MeOH); IR (film)  $\nu$  3282, 2962, 1735, 1644, 1556, 1457, 1262, 1166, 960, 756  $\text{cm}^{-1}$ ;  $^1\text{H}$  NMR ( $\text{CDCl}_3$ , 500 MHz)  $\delta$  0.86 (d,  $J$  = 6.9 Hz, 3H, H15'), 0.87 (d,  $J$  = 6.9 Hz, 3H, H13), 0.97 (d,  $J$  = 6.9 Hz, 3H, H14'), 1.12 (s, 9H, H11, H16, H17), 1.42 (d,  $J$  = 6.9 Hz, 3H, H11'), 1.55 (s, 3H, H14), 1.79 (s, 3H, H15), 2.17 (dq,  $J$  = 11.5, 6.9 Hz, 1H, H4), 2.43 (dq,  $J$  = 10.9, 6.9, 6.9 Hz, 1H, H13'), 2.81 (d,  $J$  = 13.2 Hz, 1H, H2), 2.86 (s, 3H, H12'), 2.99 (d,  $J$  = 13.2 Hz, 1H, H2), 3.48 (d,  $J$  = 18.4 Hz, 1H, H8'), 4.25 (d,  $J$  = 10.9 Hz, 1H, H5'), 4.69 (dd,  $J$  = 18.4, 10.3 Hz, 1H, H8'), 5.01 (s, 1H, H12), 5.05 (s, 1H, H12), 5.17 (d,  $J$  = 11.5 Hz, 1H, H5), 5.29 (s, 1H, H9), 5.34 (dq,  $J$  = 9.2, 6.9 Hz, 1H, H2'), 5.93 (s, 1H, H7), 6.57 (d,  $J$  = 9.2 Hz, 1H, H1'), 7.96 (d,  $J$  = 10.3 Hz, 1H, H7');  $^{13}\text{C}$  NMR (125 MHz,  $\text{CDCl}_3$ )  $\delta$  12.4, 17.8, 18.5, 18.6, 18.9, 19.3, 26.1, 28.8, 30.8, 32.6, 38.9, 41.1, 43.0, 46.6, 67.1, 83.4, 113.8, 129.1, 130.4, 137.3, 141.5, 144.7, 167.6, 167.8, 171.0, 173.0; HRMS (ESI-TOF) calcd for  $\text{C}_{28}\text{H}_{45}\text{N}_3\text{O}_5\text{Na}$  526.3251 ( $\text{M}+\text{Na}^+$ ), found 526.3249.

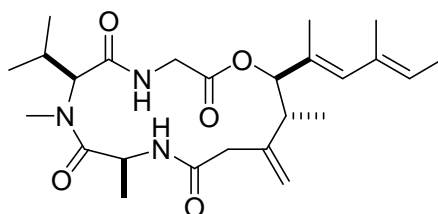

**9-Methyl-analogue 5a.** **5a** was obtained in 75% yield by following the procedure of **1a**: Colorless solid;  $[\alpha]_D^{25.2} = -201^\circ$  ( $c$  0.52, MeOH); IR (film)  $\nu$  3281, 2968, 1737, 1641, 1550, 1444, 1267, 960, 756  $\text{cm}^{-1}$ ;  $^1\text{H}$  NMR (500 MHz,  $\text{CDCl}_3$ )  $\delta$  0.86 (3H, d,  $J$  = 7.4 Hz, H15'), 0.87 (3H, d,  $J$  = 7.5 Hz, H13), 0.97 (3H, d,  $J$  = 6.9 Hz, H14'), 1.41 (3H, d,  $J$  = 6.9 Hz, H11'), 1.58 (3H, s, H14), 1.65 (3H, d,  $J$  = 6.9 Hz, H10), 1.78 (3H, s, H15), 2.18 (1H, dq,  $J$  = 11.5, 7.5 Hz, H4), 2.43 (1H, dq,  $J$  = 10.9, 7.4, 6.9 Hz, H13'), 2.81 (1H, d,  $J$  = 13.2 Hz, H2), 2.85 (3H, s, H12'), 2.98 (1H, d,  $J$  = 13.2 Hz, H2), 3.48 (1H, dd,  $J$  = 18.3, 1.7 Hz, H8'), 4.24 (1H, d,  $J$  = 10.9 Hz, H5'), 4.67 (1H, dd,  $J$  = 18.3, 10.3 Hz, H8'), 5.01, (1H, s, H12'), 5.05 (1H, s, H12'), 5.18 (1H, d,  $J$  = 11.5 Hz, H5), 5.34 (1H, dq,  $J$  = 9.2, 6.9 Hz, H12'), 5.42 (1H, q,  $J$  = 6.9 Hz, H9), 5.97 (1H, s, H7), 6.62 (1H, d,  $J$  = 9.2 Hz, H1'), 7.95 (1H, dd,  $J$  = 10.3, 1.7 Hz, H7');  $^{13}\text{C}$  NMR (125 MHz,  $\text{CDCl}_3$ )  $\delta$  12.6, 13.6, 16.3, 18.5, 18.6, 18.8, 19.3, 26.1, 28.7, 38.9, 41.1, 43.0, 46.6, 67.1, 83.6, 113.8, 126.1, 129.2, 132.6, 135.5, 144.7, 167.6, 167.8, 171.0, 173.1; HRMS (ESI-TOF) calcd for  $\text{C}_{25}\text{H}_{39}\text{N}_3\text{O}_5\text{Na}$  484.2782 ( $\text{M}+\text{Na}^+$ ), found 484.2781.

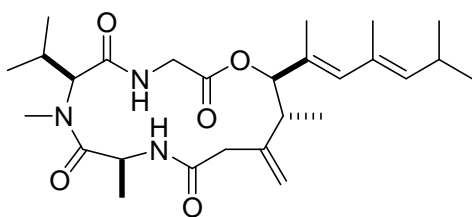

**9-Isopropyl-analogue 5b.** **5b** was obtained in 86% yield by following the procedure of **1a**: Colorless solid;  $[\alpha]_D^{25.3} = -178^\circ$  (*c* 0.73, MeOH); IR (film)  $\nu$  3282, 2963, 1736, 1641, 1552, 1459, 1268, 757  $\text{cm}^{-1}$ ;  $^1\text{H}$  NMR (500 MHz,  $\text{CDCl}_3$ )  $\delta$  0.86 (3H, d,  $J = 6.9$  Hz, H15'), 0.88 (3H, d,  $J = 7.4$  Hz, H13), 0.94 (3H, d,  $J = 5.1$  Hz, H16), 0.96 (3H, d,  $J = 5.1$  Hz, H11), 0.97 (3H, d,  $J = 6.3$  Hz, H14'), 1.41 (3H, d,  $J = 6.9$  Hz, H11'), 1.57 (3H, s, H14), 1.71 (3H, s, H15), 2.18 (1H, dq,  $J = 10.9, 7.4$  Hz, H4), 2.43 (1H, dq,  $J = 10.9, 6.9, 6.3$  Hz, H13'), 2.54 (1H, dq,  $J = 9.7, 5.1, 5.1$  Hz, H10), 2.82 (1H, d,  $J = 13.2$  Hz, H2), 2.85 (3H, s, H12'), 2.98 (1H, d,  $J = 13.2$  Hz, H2), 3.48 (1H, dd,  $J = 18.3, 1.7$  Hz, H8'), 4.25 (1H, d,  $J = 10.9$  Hz, H5'), 4.68 (1H, dd,  $J = 18.3, 10.4$  Hz, H8'), 5.00 (1H, s, H12'), 5.05 (1H, s, H12'), 5.14 (1H, d,  $J = 9.7$  Hz, H9), 5.18 (1H, d,  $J = 10.9$  Hz, H5), 5.34 (1H, dq,  $J = 9.1, 6.9$  Hz, H12'), 5.94 (1H, s, H7), 6.70 (1H, d,  $J = 9.1$  Hz, H1'), 7.96 (1H, dd,  $J = 10.4, 1.7$  Hz, H7');  $^{13}\text{C}$  NMR (125 MHz,  $\text{CDCl}_3$ )  $\delta$  12.5, 16.6, 18.5, 18.6, 18.8, 19.3, 22.80, 22.83, 26.1, 27.3, 28.8, 38.9, 41.1, 43.0, 46.5, 67.1, 83.6, 113.7, 129.2, 129.4, 135.6, 139.5, 144.8, 167.6, 167.8, 171.0, 173.1; HRMS (ESI-TOF) calcd for  $\text{C}_{27}\text{H}_{43}\text{N}_3\text{O}_5\text{Na}$  512.3095 ( $\text{M}+\text{Na}^+$ ), found 512.3092.

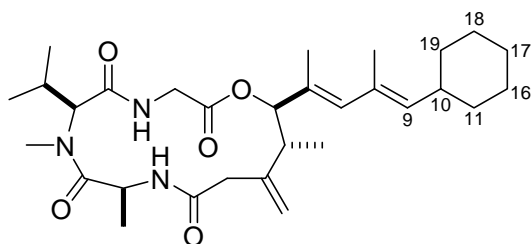

**9-Cyclohexyl-analogue 5c.** **5c** was obtained in 80% yield by following the procedure of **1a**: Colorless solid;  $[\alpha]_D^{25.2} = -165^\circ$  (*c* 0.53, MeOH); IR (film)  $\nu$  3283, 2926, 1736, 1643, 1552, 1448, 1267, 756  $\text{cm}^{-1}$ ;  $^1\text{H}$  NMR (500 MHz,  $\text{CDCl}_3$ )  $\delta$  0.86 (3H, d,  $J = 6.8$  Hz, H15'), 0.88 (3H, d,  $J = 6.8$  Hz, H13), 0.97 (3H, d,  $J = 6.9$  Hz, H14'), 1.05 (2H, m, H11ax, H19ax), 1.18 (1H, tt,  $J = 12.6, 3.4$  Hz, H17ax), 1.2.31 (2H, m, H16ax, H18ax), 1.41 (3H, d,  $J = 6.9$  Hz, H11'), 1.57 (3H, s, H14), 1.60-1.63 (3H, m, H11eq, H17eq, H19eq), 1.69 (2H, m, H16eq, H18eq), 1.71 (3H, s, H15), 2.18 (1H, dq,  $J = 11.5, 6.8$  Hz, H4), 2.19 (1H, m, H10), 2.43 (1H, dq,  $J = 10.9, 6.9, 6.8$  Hz, H13'), 2.82 (1H, d,  $J = 13.2$  Hz, H2), 2.85 (3H, s, H12'), 2.98 (1H, d,  $J = 13.2$  Hz, H2), 3.48 (1H, dd,  $J = 18.3, 1.7$  Hz, H8'), 4.25 (1H, d,  $J = 10.9$  Hz, H5'), 4.68 (1H, dd,  $J = 18.3, 10.3$  Hz, H8'), 5.00 (1H, s, H12), 5.05 (1H, s, H12), 5.16 (1H, d,  $J = 9.1$  Hz, H9), 5.18 (1H, d,  $J = 11.5$  Hz, H5), 5.34 (1H, dq,  $J = 9.1, 6.9$  Hz, H2'), 5.95 (1H, s, H7), 6.70 (1H, d,  $J = 9.1$  Hz, H1'), 7.95 (1H, dd,  $J = 10.3, 1.7$  Hz, H7');  $^{13}\text{C}$  NMR (125 MHz,  $\text{CDCl}_3$ )  $\delta$  12.6, 16.7, 18.5, 18.6, 18.9, 19.3, 25.93, 25.94, 26.05, 26.09, 28.8, 32.90, 32.96, 37.2, 38.9, 41.1, 43.0, 46.6, 67.1, 83.6, 113.7, 129.3, 129.6, 135.7, 138.1, 144.8, 167.6, 167.8, 171.0, 173.1; HRMS (ESI-TOF) calcd for  $\text{C}_{30}\text{H}_{47}\text{N}_3\text{O}_5\text{Na}$  552.3408 ( $\text{M}+\text{Na}^+$ ), found 552.3400.

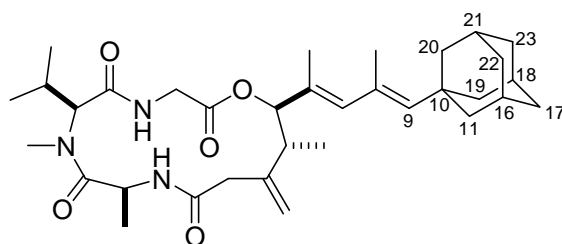

**9-(1-Adamantyl)-analogue 5d.** **5d** was obtained in 80% yield by following the procedure of **1a**: Colorless solid;  $[\alpha]_D^{24.7} = -147^\circ$  (*c* 0.55, MeOH); IR (film)  $\nu$  3282, 2904, 1736, 1643, 1552, 1450, 1269, 756  $\text{cm}^{-1}$ ;  $^1\text{H}$  NMR (500 MHz,  $\text{CDCl}_3$ )  $\delta$  0.86 (3H, d,  $J = 6.3$  Hz, H15'), 0.87 (3H, d,  $J = 7.5$  Hz, H13), 0.97 (3H,  $J = 6.9$  Hz, H14'), 1.42 (3H, d,  $J = 6.8$  Hz, H11'), 1.55 (3H, s, H14), 1.68 (6H, m, H17, H22, H23), 1.77 (6H, d,  $J = 2.9$  Hz, H11, H19, H20), 1.80 (3H, s, H15), 1.95 (3H, m, H16, H18, H21), 2.17 (1H, dq,  $J = 11.5, 7.5$  Hz, H4), 2.43 (1H, dq,  $J = 11.5, 6.9, 6.3$  Hz, H13'), 2.81 (1H, d,  $J = 13.2$  Hz, H2), 2.86 (3H, s, H12'), 2.98 (1H, d,  $J = 13.2$  Hz, H2), 3.48 (1H, dd,  $J = 18.9, 1.7$  Hz, H8'), 4.24 (1H, d,  $J = 11.5$  Hz, H5'), 4.68 (1H, dd,  $J = 18.9, 10.3$  Hz, H8'), 5.00 (1H, s, H12), 5.02 (1H, s, H9), 5.05 (1H, s, H12), 5.16 (1H, d,  $J = 11.5$  Hz, H5), 5.34 (1H, dq,  $J = 9.1, 6.8$  Hz, H2'), 5.92 (1H, s, H7), 6.58 (1H, d,  $J = 9.1$  Hz, H1'), 7.94 (1H, dd,  $J = 10.3, 1.7$  Hz, H7');  $^{13}\text{C}$  NMR (125 MHz,  $\text{CDCl}_3$ )  $\delta$  12.5, 18.2, 18.55, 18.63, 18.9, 19.3, 26.1, 28.8, 35.2, 36.9, 39.0, 41.1, 42.6, 43.0, 46.6, 67.1, 83.4, 113.7, 129.1, 130.1, 137.6, 141.5, 144.7, 167.6, 167.8, 171.0, 173.0; HRMS (ESI-TOF) calcd for  $\text{C}_{34}\text{H}_{51}\text{N}_3\text{O}_5\text{Na}$  604.3721 ( $\text{M}+\text{Na}^+$ ), found 604.3721.

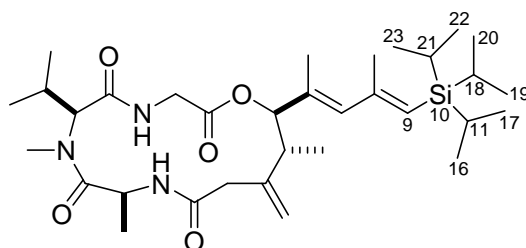

**9-Triisopropylsilyl-analogue 5e.** **5e** was obtained in 78% yield by following the procedure of **1a**: Colorless solid;  $[\alpha]_D^{25.2} = -140^\circ$  (*c* 0.59, MeOH); IR (film)  $\nu$  3282, 2963, 2865, 1738, 1645, 1552, 1461, 1264, 884  $\text{cm}^{-1}$ ;  $^1\text{H}$  NMR (500 MHz,  $\text{CDCl}_3$ )  $\delta$  0.86 (3H, d,  $J = 6.9$  Hz, H15'), 0.89 (3H, d,  $J = 6.9$  Hz, H13), 0.97 (3H, d,  $J = 6.3$  Hz, H14'), 1.04 (18H, d,  $J = 7.4$  Hz, H16, H17, H19, H20, H22, H23), 1.13 (3H, qq,  $J = 7.4, 7.4$  Hz, H11, H18, H21), 1.42 (3H, d,  $J = 6.9$  Hz, H11'), 1.59 (3H, s, H14), 1.84 (3H, s, H15), 2.19 (1H, dq,  $J = 11.5, 6.9$  Hz, H4), 2.43 (1H, dq,  $J = 10.9, 6.9, 6.3$  Hz, H13'), 2.81 (1H, d,  $J = 13.2$  Hz, H2), 2.85 (3H, s, H12'), 2.99 (1H, d,  $J = 13.2$  Hz, H2), 3.49 (1H, dd,  $J = 18.9, 1.7$  Hz, H8'), 4.25 (1H, d,  $J = 10.9$  Hz, H5'), 4.71 (1H, dd,  $J = 18.3, 10.3$  Hz, H8'), 5.01, (1H, s, H12), 5.06 (1H, s, H12), 5.20 (1H, d,  $J = 11.5$  Hz, H5), 5.24 (1H, s, H9), 5.34 (1H, dq,  $J = 9.1, 6.9$  Hz, H2'), 6.08 (1H, s, H7), 6.60 (1H, d,  $J = 9.1$  Hz, H1'), 7.97 (1H, dd,  $J = 10.3, 1.7$  Hz, H7');  $^{13}\text{C}$  NMR (125 MHz,  $\text{CDCl}_3$ )  $\delta$  12.2, 12.7, 18.5, 18.6, 18.9, 19.0, 19.3, 23.5, 26.1, 28.7, 39.1, 41.1, 43.1, 46.5, 67.1, 83.0, 113.8, 125.5, 130.6, 137.4, 144.6, 150.4, 167.6, 167.9, 171.0, 173.1; HRMS (ESI-TOF) calcd for  $\text{C}_{33}\text{H}_{57}\text{N}_3\text{O}_5\text{Na}$  626.3960 ( $\text{M}+\text{Na}^+$ ), found 626.3961.

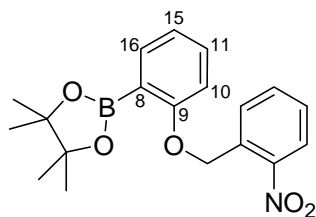

***o*-(*o*-Nitrobenzyloxy)phenylboronic ester 6a.** To a solution of 2-(4,4,5,5-tetramethyl-1,3,2-dioxaborolan-2-yl)phenol (110 mg, 500  $\mu\text{mol}$ ) in dry DMF (2.5 mL) were added *o*-nitrobenzylbromide **5-1** (97.2 mg, 450  $\mu\text{mol}$ ) and  $\text{K}_2\text{CO}_3$  (76 mg, 550  $\mu\text{mol}$ ) at 0  $^\circ\text{C}$ . The reaction mixture was stirred in the dark at room temperature for 4 h and at 45  $^\circ\text{C}$  for another 3 h. The reaction was quenched with  $\text{H}_2\text{O}$ . The aqueous layer was extracted six times with a mixture of hexane/ $\text{Et}_2\text{O}$  = 2/1. The combined organic layer was washed with  $\text{H}_2\text{O}$  and brine, dried over  $\text{Na}_2\text{SO}_4$ , filtrated and concentrated. The residue was purified with flash column chromatography on silica gel (hexane/ $\text{AcOEt}$  = 25) to give 64.0 mg of **6a** (34%): colorless solid; IR (film)  $\nu$  2976, 1604, 1525, 1450, 1353, 1251, 1147, 1075, 860, 728  $\text{cm}^{-1}$ ;  $^1\text{H}$  NMR (500 MHz,  $\text{CDCl}_3$ )  $\delta$  1.41 (12H, s, pinacol), 5.50 (2H, s,  $\text{OCH}_2\text{C}_6\text{H}_4\text{NO}_2$ ), 7.02 (1H, t,  $J$  = 7.4 Hz, H15), 7.05 (1H, dd,  $J$  = 7.4, 1.7 Hz, H10), 7.47 (1H, td,  $J$  = 7.4, 1.7 Hz, H11), 7.49 (1H, td,  $J$  = 8.0, 1.1 Hz,  $\text{OCH}_2\text{C}_6\text{H}_4\text{NO}_2$ ), 7.73 (1H, td,  $J$  = 8.0, 1.1 Hz,  $\text{OCH}_2\text{C}_6\text{H}_4\text{NO}_2$ ), 7.79 (1H, dd,  $J$  = 7.4, 1.7 Hz, H16), 8.20 (1H, dd,  $J$  = 8.0, 1.1 Hz,  $\text{OCH}_2\text{C}_6\text{H}_4\text{NO}_2$ ), 8.71 (1H, dd,  $J$  = 8.0, 1.1 Hz,  $\text{OCH}_2\text{C}_6\text{H}_4\text{NO}_2$ );  $^{13}\text{C}$  NMR (125 MHz,  $\text{CDCl}_3$ )  $\delta$  25.0, 66.8, 83.4, 111.5, 120.9, 124.6, 127.8, 129.4, 133.0, 133.9, 134.7, 137.2, 146.2, 162.6; HRMS (ESI-TOF) calcd for  $\text{C}_{20}\text{H}_{25}\text{BNO}_6$  386.1780 ( $\text{M}+\text{OCH}_3^-$ ), found 386.1780.

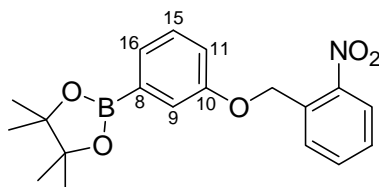

***m*-(*o*-Nitrobenzyloxy)phenylboronic ester 6b.** **6b** was obtained in 82% yield by following the procedure of **6a**. Colorless solid; IR (film)  $\nu$  2979, 1526, 1429, 1355, 1223, 1145, 855, 788  $\text{cm}^{-1}$ ;  $^1\text{H}$  NMR (500 MHz,  $\text{CDCl}_3$ )  $\delta$  1.36 (12H, s, pinacol), 5.51 (2H, s,  $\text{OCH}_2\text{C}_6\text{H}_4\text{NO}_2$ ), 7.09 (1H, ddd,  $J$  = 8.6, 2.9, 1.1 Hz, H11), 7.33 (1H, t,  $J$  = 8.6 Hz, H15), 7.46 (1H, m, H16), 7.47 (1H, m, H9), 7.48 (1H, t,  $J$  = 8.0 Hz,  $\text{OCH}_2\text{C}_6\text{H}_4\text{NO}_2$ ), 7.68 (1H, td,  $J$  = 8.0, 1.1 Hz,  $\text{OCH}_2\text{C}_6\text{H}_4\text{NO}_2$ ), 7.94 (1H, d,  $J$  = 8.0 Hz,  $\text{OCH}_2\text{C}_6\text{H}_4\text{NO}_2$ ), 8.16 (1H, dd,  $J$  = 8.0, 1.1 Hz,  $\text{OCH}_2\text{C}_6\text{H}_4\text{NO}_2$ );  $^{13}\text{C}$  NMR (125 MHz,  $\text{CDCl}_3$ )  $\delta$  24.8, 66.6, 83.9, 117.9, 120.5, 124.9, 127.9, 128.2, 128.6, 129.1, 133.9, 134.0, 146.9, 157.6; HRMS (ESI-TOF) calcd for  $\text{C}_{20}\text{H}_{25}\text{BNO}_6$  386.1780 ( $\text{M}+\text{OCH}_3^-$ ), found 386.1785.

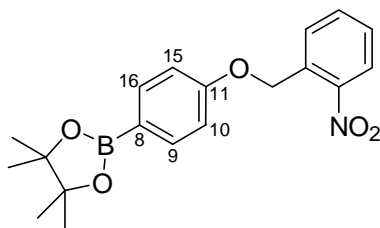

***p*-(*o*-Nitrobenzyloxy)phenylboronic ester 6c.** **6c** was obtained in 77% yield by following the procedure of **6a**. Colorless solid; IR (film)  $\nu$  2978, 1605, 1528, 1361, 1242, 1144, 1093, 1033, 860, 729  $\text{cm}^{-1}$ ;  $^1\text{H}$  NMR (500 MHz,  $\text{CDCl}_3$ )  $\delta$  1.34 (12H, s, pinacol), 5.52 (2H, s,  $\text{OCH}_2\text{C}_6\text{H}_4\text{NO}_2$ ), 6.99 (2H, dt,  $J = 9.1, 2.3$  Hz, H9, H16), 7.49 (1H, t,  $J = 8.0$  Hz,  $\text{OCH}_2\text{C}_6\text{H}_4\text{NO}_2$ ), 7.67 (1H, td,  $J = 8.0, 1.1$  Hz,  $\text{OCH}_2\text{C}_6\text{H}_4\text{NO}_2$ ), 7.78 (2H, dt,  $J = 9.1, 2.3$  Hz, H10, H15), 7.88 (1H, d,  $J = 8.0$  Hz,  $\text{OCH}_2\text{C}_6\text{H}_4\text{NO}_2$ ), 8.17 (1H, dd,  $J = 8.0, 1.1$  Hz,  $\text{OCH}_2\text{C}_6\text{H}_4\text{NO}_2$ );  $^{13}\text{C}$  NMR (125 MHz,  $\text{CDCl}_3$ )  $\delta$  24.8, 66.4, 83.6, 114.1, 125.0, 128.3, 128.4, 133.7, 134.0, 136.6, 146.8, 160.5; HRMS (ESI-TOF) calcd for  $\text{C}_{20}\text{H}_{25}\text{BNO}_6$  386.1780 ( $\text{M}+\text{OCH}_3^-$ ), found 386.1770.

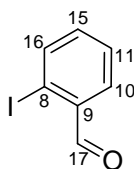

***o*-Iodobenzaldehyde 9.** To a solution of *o*-iodobenzylalcohol (1.0 g, 4.27 mmol) in dry MeCN (4.3 mL) were added MS4Å (500 mg), NMO (551 mg, 4.70 mmol) and TPAP (75 mg, 2.14  $\mu\text{mol}$ ) at 0  $^\circ\text{C}$ . The reaction mixture was stirred at room temperature for 1.5 h and filtrated through short flash column chromatography on silica gel with AcOEt. The filtrate was concentrated. The residue was purified with flash column chromatography on silica gel (hexane/AcOEt = 50/1) to give 804 mg of **9** (81%, a mixture of aldehyde and hydrate): colorless oil; IR (film)  $\nu$  2853, 1696, 1580, 1438, 1262, 1200, 1015, 822, 754  $\text{cm}^{-1}$ ;  $^1\text{H}$  NMR (500 MHz,  $\text{CDCl}_3$ )  $\delta$  7.26 (1H, td,  $J = 8.0, 2.3$  Hz, H11), 7.44 (1H, td,  $J = 8.0, 1.1$  Hz, H16), 7.86 (1H, dd,  $J = 8.0, 2.3$  Hz, H16), 7.93 (1H, dd,  $J = 8.0, 1.1$  Hz, H15), 10.0 (1H, s, H17);  $^{13}\text{C}$  NMR (125 MHz,  $\text{CDCl}_3$ )  $\delta$  100.7, 128.6, 130.2, 135.0, 135.4, 140.5, 195.7; HRMS (ESI-TOF) calcd for  $\text{C}_{14}\text{H}_{10}\text{I}_2\text{O}_2\text{Na}$  486.8668 ( $2\text{M}+\text{Na}^+$ ), found 486.8661.

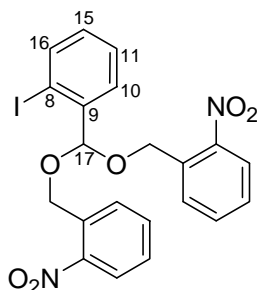

***o*-[Bis(*o*-nitrobenzyloxy)methyl]iodobenzene 10.** To a solution of **9** (154 mg, 665  $\mu\text{mol}$ ) in dry benzene (6.7 mL) were added *o*-nitrobenzylalcohol (204 mg, 1.33 mmol) and TsOH $\cdot$ H $_2$ O (6.3 mg, 33.3  $\mu\text{mol}$ ) at room temperature. The reaction mixture was stirred at 95  $^\circ\text{C}$  for 20 h using Dean-Stark trap in the dark. TsOH was removed from the mixture using a pad of Florisil with a mixture of hexane/AcOEt = 5/1. The filtrate was

concentrated. The residue was purified with flash column chromatography on Florisil (hexane/AcOEt = 40/1) to give 189 mg of **10** (55%): colorless solid; IR (film)  $\nu$  2921, 1613, 1519, 1337, 1202, 1051, 856, 790, 729, 682  $\text{cm}^{-1}$ ;  $^1\text{H}$  NMR (500 MHz,  $\text{C}_6\text{D}_6$ )  $\delta$  4.90 (2H, d,  $J = 14.9$  Hz,  $\text{OCH}_2\text{C}_6\text{H}_4\text{NO}_2$ ), 4.96 (2H, d,  $J = 14.9$  Hz,  $\text{OCH}_2\text{C}_6\text{H}_4\text{NO}_2$ ), 5.92 (1H, s, H17), 6.55 (1H, td,  $J = 8.0, 1.7$  Hz, H15), 6.66 (2H, t,  $J = 8.0$  Hz,  $\text{OCH}_2\text{C}_6\text{H}_4\text{NO}_2$ ), 6.96 (2H, t,  $J = 8.0$  Hz,  $\text{OCH}_2\text{C}_6\text{H}_4\text{NO}_2$ ), 7.01 (1H, t,  $J = 8.0$  Hz, H11), 7.61-7.63 (5H, m, H16,  $\text{OCH}_2\text{C}_6\text{H}_4\text{NO}_2$ ), 7.73 (1H, dd,  $J = 8.0, 1.7$  Hz, H10);  $^{13}\text{C}$  NMR (125 MHz,  $\text{C}_6\text{D}_6$ )  $\delta$  65.4, 98.0, 105.6, 124.6, 128.3, 128.6, 128.8, 130.9, 133.3, 134.4, 139.6, 140.1, 147.4; HRMS (ESI-TOF) calcd for  $\text{C}_{21}\text{H}_{17}\text{N}_2\text{O}_6\text{Na}$  543.0024 ( $\text{M}+\text{Na}^+$ ), found 543.0012.

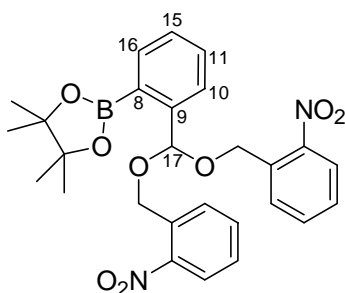

***o*-[Bis(*o*-nitrobenzyloxy)methyl]phenylboronic ester **6d**.** To a solution of **10** (96.8 mg, 186  $\mu\text{mol}$ ) in dry DMF (930  $\mu\text{L}$ ) were added bispinacolato diboron (87 mg, 343  $\mu\text{mol}$ ),  $\text{Pd}(\text{OAc})_2$  (4.2 mg, 18.6  $\mu\text{mol}$ ) and KOAc (65 mg, 662  $\mu\text{mol}$ ) at room temperature. The reaction mixture was stirred at 100  $^\circ\text{C}$  for 12 h in the dark. The reaction was quenched with 0.2 M aqueous phosphate buffer (pH 6.9) at 0  $^\circ\text{C}$ . The aqueous layer was extracted five times with a mixture of hexane/AcOEt = 4/1. The combined organic layer was washed with  $\text{H}_2\text{O}$  and brine, dried over  $\text{Na}_2\text{SO}_4$ , filtrated and concentrated. The residue was purified with flash column chromatography on Florisil (hexane/toluene = 4/1 and hexane/*i*-PrOH = 100) to give 54.7 mg of **6d** (42%, a mixture of **6d/10** = 3/1): colorless oil; IR (film)  $\nu$  2979, 1695, 1525, 1346, 1145, 1036, 858, 729  $\text{cm}^{-1}$ ;  $^1\text{H}$  NMR (500 MHz,  $\text{C}_6\text{D}_6$ )  $\delta$  1.08 (12H, s, pinacol), 5.10 (2H,  $J = 15.5$  Hz,  $\text{OCH}_2\text{C}_6\text{H}_4\text{NO}_2$ ), 5.19 (2H,  $J = 15.5$  Hz,  $\text{OCH}_2\text{C}_6\text{H}_4\text{NO}_2$ ), 6.67 (2H, m,  $\text{OCH}_2\text{C}_6\text{H}_4\text{NO}_2$ ), 6.75 (1H, s, H17), 6.95 (2H, m,  $\text{OCH}_2\text{C}_6\text{H}_4\text{NO}_2$ ), 7.08-7.19 (2H, m,  $\text{BC}_6\text{H}_4\text{CH}$ ), 7.64 (2H, m,  $\text{OCH}_2\text{C}_6\text{H}_4\text{NO}_2$ ), 7.69 (2H, d,  $J = 8.0$  Hz,  $\text{OCH}_2\text{C}_6\text{H}_4\text{NO}_2$ ), 7.95 (1H, m,  $\text{BC}_6\text{H}_4\text{CH}$ ), 8.12 (1H, d,  $J = 7.4$  Hz,  $\text{BC}_6\text{H}_4\text{CH}$ );  $^{13}\text{C}$  NMR (125 MHz,  $\text{C}_6\text{D}_6$ )  $\delta$  24.7, 66.0, 83.9, 102.4, 124.5, 126.2, 127.6, 128.4, 128.5, 128.8, 129.0, 131.0, 131.3, 133.2, 133.29, 133.30, 135.2, 136.0, 147.5; HRMS (ESI-TOF) calcd for  $\text{C}_{28}\text{H}_{32}\text{BN}_2\text{O}_9$  551.2206 ( $\text{M}+\text{OCH}_3^-$ ), found 551.2197.

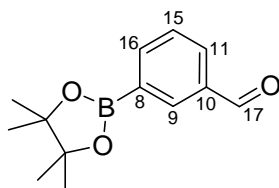

***m*-Formylphenylboronic ester **11e**.** To a solution of *m*-iodobenzaldehyde **11e** (348 mg, 1.50 mmol) in dry DMF (5 mL) were added bispinacolato diboron (381 mg, 1.50 mmol),  $\text{Pd}(\text{OAc})_2$  (33.7 mg, 150  $\mu\text{mol}$ ) and KOAc (294 mg, 3.00 mmol) at room temperature. The reaction mixture was stirred at 80  $^\circ\text{C}$  for 5 h. The reaction was



quenched with H<sub>2</sub>O at 0 °C. The aqueous layer was acidified with saturated aqueous NH<sub>4</sub>Cl and extracted twice with a mixture of hexane/AcOEt = 4/1. The combined organic layer was washed with H<sub>2</sub>O and brine, dried over Na<sub>2</sub>SO<sub>4</sub>, filtrated and concentrated. The residue was purified with flash column chromatography on silica gel (hexane/AcOEt = 50/1 to 20/1) to give 244 mg of **11e** (70%): colorless solid; IR (film)  $\nu$  2979, 1699, 1602, 1359, 1196, 1143, 851, 701 cm<sup>-1</sup>; <sup>1</sup>H NMR (500 MHz, CDCl<sub>3</sub>)  $\delta$  1.35 (12H, s, pinacol), 7.52 (1H, dd, *J* = 8.0, 7.4 Hz, H15), 7.97 (1H, d, *J* = 8.0 Hz, H11), 8.05 (1H, d, *J* = 7.4 Hz, H16), 8.30 (1H, s, H9), 10.0 (1H, s, H17); <sup>13</sup>C NMR (125 MHz, CDCl<sub>3</sub>)  $\delta$  24.8, 84.3, 128.4, 131.3, 135.6, 137.2, 140.7, 192.8; HRMS (ESI-TOF) calcd for C<sub>14</sub>H<sub>20</sub>BO<sub>4</sub> 263.1460 (M+OCH<sub>3</sub><sup>-</sup>), found 263.1457.

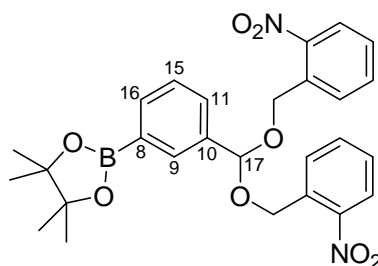

***m*-[Bis(*o*-nitrobenzyloxy)methyl]phenylboronic ester 6e.** A mixture of **6e/11e** = 4/1 was obtained in 31% yield by following the procedure of **10**. Colorless oil; IR (film)  $\nu$  2979, 1704, 1609, 1530, 1361, 1202, 1144, 1041, 855, 790 cm<sup>-1</sup>; <sup>1</sup>H NMR (500 MHz, C<sub>6</sub>D<sub>6</sub>)  $\delta$  1.12 (12H, s, pinacol), 4.84 (2H, d, *J* = 15.5 Hz, OCH<sub>2</sub>C<sub>6</sub>H<sub>4</sub>NO<sub>2</sub>), 4.93 (2H, d, *J* = 15.5 Hz, OCH<sub>2</sub>C<sub>6</sub>H<sub>4</sub>NO<sub>2</sub>), 5.59 (1H, s, H17), 6.70 (2H, td, *J* = 8.0, 1.1 Hz, OCH<sub>2</sub>C<sub>6</sub>H<sub>4</sub>NO<sub>2</sub>), 6.95 (2H, td, *J* = 8.0, 1.1 Hz, OCH<sub>2</sub>C<sub>6</sub>H<sub>4</sub>NO<sub>2</sub>), 7.27 (1H, t, *J* = 8.0 Hz, H15), 7.57 (2H, dd, *J* = 8.0, 1.1 Hz, OCH<sub>2</sub>C<sub>6</sub>H<sub>4</sub>NO<sub>2</sub>), 7.62 (2H, dd, *J* = 8.0, 1.1 Hz, OCH<sub>2</sub>C<sub>6</sub>H<sub>4</sub>NO<sub>2</sub>), 7.68 (1H, d, *J* = 8.0 Hz, H11), 8.10 (1H, d, *J* = 8.0 Hz, H16), 8.41 (1H, s, H9); <sup>13</sup>C NMR (125 MHz, C<sub>6</sub>D<sub>6</sub>)  $\delta$  24.9, 64.8, 83.9, 102.8, 124.5, 127.7, 128.8, 130.0, 133.3, 133.8, 134.8, 136.1, 137.5, 147.4, 191.5; HRMS (ESI-TOF) calcd for C<sub>28</sub>H<sub>32</sub>BN<sub>2</sub>O<sub>9</sub> 551.2206 (M+OCH<sub>3</sub><sup>-</sup>), found 551.2214.

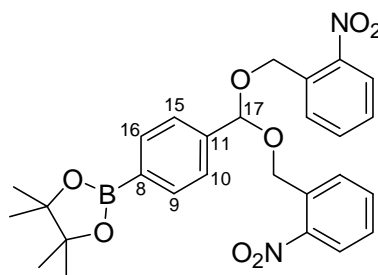

***p*-[Bis(*o*-nitrobenzyloxy)methyl]phenylboronic ester 6f.** **6f** was obtained in 32% yield by following the procedure of **10**. Colorless solid; IR (film)  $\nu$  2979, 1614, 1525, 1361, 1209, 1144, 1090, 1042, 858, 729 cm<sup>-1</sup>; <sup>1</sup>H NMR (500 MHz, C<sub>6</sub>D<sub>6</sub>)  $\delta$  1.13 (12H, s, pinacol), 4.85 (2H, d, *J* = 15.5 Hz, OCH<sub>2</sub>C<sub>6</sub>H<sub>4</sub>NO<sub>2</sub>), 4.93 (2H, d, *J* = 15.5 Hz, OCH<sub>2</sub>C<sub>6</sub>H<sub>4</sub>NO<sub>2</sub>), 5.56 (1H, s, H17), 6.69 (2H, m, OCH<sub>2</sub>C<sub>6</sub>H<sub>4</sub>NO<sub>2</sub>), 6.96 (2H, m, OCH<sub>2</sub>C<sub>6</sub>H<sub>4</sub>NO<sub>2</sub>), 7.56 (2H, dd, *J* = 8.0, 1.1 Hz, BC<sub>6</sub>H<sub>4</sub>CH), 7.62 (4H, d, *J* = 8.0 Hz, BC<sub>6</sub>H<sub>4</sub>CH, OCH<sub>2</sub>C<sub>6</sub>H<sub>4</sub>NO<sub>2</sub>), 8.20 (2H, m, OCH<sub>2</sub>C<sub>6</sub>H<sub>4</sub>NO<sub>2</sub>); <sup>13</sup>C NMR (125 MHz, C<sub>6</sub>D<sub>6</sub>)  $\delta$  24.9, 64.7, 83.9, 102.4, 124.6, 126.5, 128.5, 128.7, 133.3, 134.7, 135.6, 141.0, 147.5; HRMS (ESI-TOF) calcd for C<sub>28</sub>H<sub>32</sub>BN<sub>2</sub>O<sub>9</sub> 551.2206 (M+OCH<sub>3</sub><sup>-</sup>), found 551.2217.

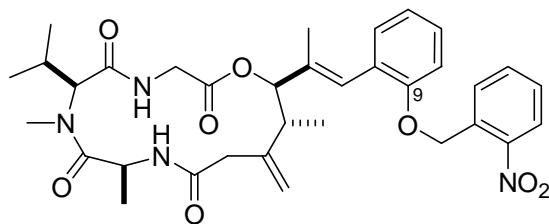

***o*-(*o*-Nitrobenzyloxy)-styrene-analogue 2a.** **2a** was obtained in 60% yield by following the procedure of **1a**: Colorless solid;  $[\alpha]_D^{26.8} = -152^\circ$  ( $c$  0.47, MeOH); IR (film)  $\nu$  3277, 2967, 1734, 1644, 1525, 1454, 1245, 753  $\text{cm}^{-1}$ ;  $^1\text{H}$  NMR (500 MHz,  $\text{CDCl}_3$ )  $\delta$  0.86 (3H, d,  $J = 6.9$  Hz, H15'), 0.97 (3H, d,  $J = 6.9$  Hz, H14'), 0.98 (3H, d,  $J = 6.9$  Hz, H13) 1.43 (3H, d,  $J = 6.9$  Hz, H11'), 1.66 (3H, d,  $J = 1.2$  Hz, H14), 2.30 (1H, dq,  $J = 10.9, 6.9$  Hz, H4), 2.42 (1H, dq,  $J = 11.5, 6.9, 6.9$  Hz, H13'), 2.83 (3H, s, H12'), 2.86 (1H, d,  $J = 13.7$  Hz, H2), 3.03 (1H, d,  $J = 13.7$  Hz, H2), 3.54 (1H, dd,  $J = 18.3, 1.7$  Hz, H8'), 4.25 (1H, d,  $J = 11.5$  Hz, H5'), 4.70 (1H, dd,  $J = 18.3, 10.3$  Hz, H8'), 5.10 (1H, s, H12), 5.12 (1H, s, H12), 5.36 (1H, dq,  $J = 9.1, 6.9$  Hz, H2'), 5.45 (1H, d,  $J = 15.5$  Hz, OCH2Ar), 5.48 (1H, d,  $J = 10.9$  Hz, H5), 5.49 (1H, d,  $J = 15.5$  Hz, OCH2C6H4NO2), 6.62 (1H, d,  $J = 9.1$  Hz, H1'), 6.85 (1H, d,  $J = 1.2$  Hz, H7), 6.97 (1H, t,  $J = 7.4$  Hz, H15), 6.98 (1H, d,  $J = 7.4$  Hz, H10), 7.20 (1H, d,  $J = 7.4$  Hz, H16), 7.25 (1H, t,  $J = 7.4$  Hz, H11), 7.48 (1H, t,  $J = 8.0$  Hz, OCH2C6H4NO2), 7.79 (1H, td,  $J = 8.0, 1.1$  Hz, OCH2C6H4NO2), 8.01 (1H, d,  $J = 10.3, 1.7$  Hz, H7'), 8.04 (1H, d,  $J = 8.0$  Hz, OCH2C6H4NO2), 8.18 (1H, dd,  $J = 8.0, 1.1$  Hz, OCH2C6H4NO2);  $^{13}\text{C}$  NMR (125 MHz,  $\text{CDCl}_3$ )  $\delta$  12.7, 18.57, 18.62, 18.9, 19.3, 26.1, 28.7, 38.8, 41.1, 43.1, 46.6, 66.7, 67.1, 83.0, 111.9, 113.9, 120.7, 124.7, 126.0, 127.6, 128.0, 128.7, 128.8, 130.3, 133.3, 134.1, 134.6, 144.7, 146.4, 155.7, 167.6, 167.8, 171.0, 173.1; HRMS (ESI-TOF) calcd for  $\text{C}_{34}\text{H}_{42}\text{N}_4\text{O}_8\text{Na}$  657.2895 ( $\text{M}+\text{Na}^+$ ), found 657.2898.

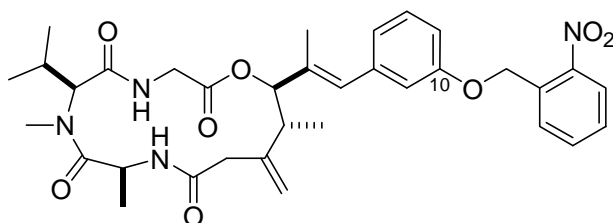

***m*-(*o*-Nitrobenzyloxy)-styrene-analogue 2b.** **2b** was obtained in 83% yield by following the procedure of **1a**: Colorless solid;  $[\alpha]_D^{26.1} = -125^\circ$  ( $c$  0.66, MeOH); IR (film)  $\nu$  3280, 2967, 1734, 1644, 1526, 1341, 1262, 757  $\text{cm}^{-1}$ ;  $^1\text{H}$  NMR (500 MHz,  $\text{CDCl}_3$ )  $\delta$  0.86 (3H, d,  $J = 6.9$  Hz, H15'), 0.94 (3H, d,  $J = 7.5$  Hz, H13), 0.97 (3H, d,  $J = 6.3$  Hz, H14'), 1.43 (3H, d,  $J = 6.9$  Hz, H11'), 1.70 (3H, d,  $J = 1.2$  Hz, H14), 2.26 (1H, dq,  $J = 11.4, 7.5$  Hz, H4), 2.42 (1H, dq,  $J = 11.5, 6.9, 6.3$  Hz, H13'), 2.83 (3H, s, H12'), 2.85 (1H, d,  $J = 13.2$  Hz, H2), 3.01 (1H, d,  $J = 13.2$  Hz, H2), 3.51 (1H, dd,  $J = 18.3, 1.7$  Hz, H8'), 4.24 (1H, d,  $J = 11.5$  Hz, H5'), 4.70 (1H, dd,  $J = 18.3, 10.3$  Hz, H8'), 5.06 (1H, s, H12), 5.09 (1H, s, H12), 5.33 (1H, d,  $J = 11.4$  Hz, H5), 5.36 (1H, dq,  $J = 9.7, 6.9$  Hz, H2'), 5.49 (2H, s, OCH2C6H4NO2), 6.56 (1H, d,  $J = 1.2$  Hz, H7), 6.67 (1H, d,  $J = 9.7$  Hz, H1'), 6.85 (1H, dd,  $J = 8.0, 1.7$  Hz, H11), 6.90 (1H, d,  $J = 1.7$  Hz, H9), 6.91 (1H, d,  $J = 8.0$  Hz, H16), 7.25 (1H, t,  $J = 8.0$  Hz, H15), 7.48 (1H, t,  $J = 8.0$  Hz, OCH2C6H4NO2), 7.68 (1H, td,  $J = 8.0, 1.1$  Hz, OCH2C6H4NO2), 7.88 (1H, d,  $J = 8.0$  Hz, OCH2C6H4NO2), 7.99 (1H, dd,  $J = 10.3, 1.7$  Hz, H7'), 8.16 (1H, dd,  $J = 8.0, 1.1$  Hz, OCH2C6H4NO2);  $^{13}\text{C}$

NMR (125 MHz, CDCl<sub>3</sub>)  $\delta$  13.0, 18.56, 18.63, 18.8, 19.3, 26.1, 28.7, 39.1, 41.1, 43.1, 46.6, 66.8, 67.1, 82.9, 113.3, 134.0, 115.9, 122.4, 125.0, 128.3, 128.6, 129.3, 131.0, 133.90, 133.94, 134.0, 138.2, 144.6, 147.0, 157.9, 167.6, 167.9, 171.0, 173.2; HRMS (ESI-TOF) calcd for C<sub>34</sub>H<sub>42</sub>N<sub>4</sub>O<sub>8</sub>Na 657.2895 (M+Na<sup>+</sup>), found 657.2888.

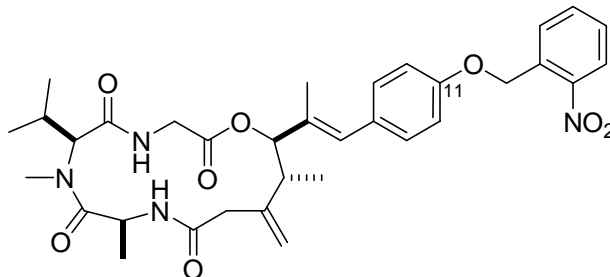

***p*-(*o*-Nitrobenzyloxy)-styrene-analogue 2c.** **2c** was obtained in 77% yield by following the procedure of **1a**:

Colorless solid;  $[\alpha]_D^{25.6} = -141^\circ$  (*c* 0.59, MeOH); IR (film)  $\nu$  3279, 2967, 1735, 1638, 1526, 1509, 1341, 1244, 756 cm<sup>-1</sup>; <sup>1</sup>H NMR (500 MHz, CDCl<sub>3</sub>)  $\delta$  0.86 (3H, d, *J* = 6.3 Hz, H15'), 0.93 (3H, d, *J* = 7.5 Hz, H13), 0.97 (3H, d, *J* = 6.3 Hz, H14'), 1.43 (3H, d, *J* = 6.9 Hz, H11'), 1.71 (3H, s, H14), 2.26 (1H, dq, *J* = 11.4, 7.5 Hz, H4), 2.42 (1H, dq, *J* = 10.9, 6.3, 6.3 Hz, H13'), 2.84 (3H, s, H12'), 2.85 (1H, d, *J* = 13.2 Hz, H2), 3.01 (1H, d, *J* = 13.2 Hz, H2), 3.50 (1H, d, *J* = 18.3 Hz, H8'), 4.24 (1H, d, *J* = 10.9 Hz, H5'), 4.69 (1H, dd, *J* = 18.3, 10.3 Hz, H8'), 5.06 (1H, s, H12), 5.09 (1H, s, H12), 5.33 (1H, d, *J* = 11.4 Hz, H5), 5.36 (1H, dq, *J* = 9.8, 6.9 Hz, H2'), 5.50 (2H, s, OCH<sub>2</sub>C<sub>6</sub>H<sub>4</sub>NO<sub>2</sub>), 6.53 (1H, s, H7), 6.65 (1H, d, *J* = 9.8 Hz, H1'), 6.94 (2H, d, *J* = 8.6 Hz, H10, H15), 7.23 (2H, d, *J* = 8.6 Hz, H9, H16), 7.48 (1H, t, *J* = 8.0 Hz, OCH<sub>2</sub>C<sub>6</sub>H<sub>4</sub>NO<sub>2</sub>), 7.67 (1H, t, *J* = 8.0 Hz, OCH<sub>2</sub>C<sub>6</sub>H<sub>4</sub>NO<sub>2</sub>), 7.87 (1H, d, *J* = 8.0 Hz, OCH<sub>2</sub>C<sub>6</sub>H<sub>4</sub>NO<sub>2</sub>), 7.98 (1H, d, *J* = 10.3 Hz, H7'), 8.17 (1H, d, *J* = 8.0 Hz, OCH<sub>2</sub>C<sub>6</sub>H<sub>4</sub>NO<sub>2</sub>); <sup>13</sup>C NMR (125 MHz, CDCl<sub>3</sub>)  $\delta$  12.9, 18.57, 18.63, 18.9, 19.3, 26.1, 28.7, 39.1, 41.1, 43.1, 46.6, 66.8, 67.1, 83.2, 113.9, 114.6, 125.0, 128.3, 128.5, 130.1, 130.5, 130.7, 131.9, 133.9, 134.0, 144.6, 146.9, 157.0, 167.6, 167.9, 171.0, 173.2; HRMS (ESI-TOF) calcd for C<sub>34</sub>H<sub>42</sub>N<sub>4</sub>O<sub>8</sub>Na 657.2895 (M+Na<sup>+</sup>), found 657.2899.

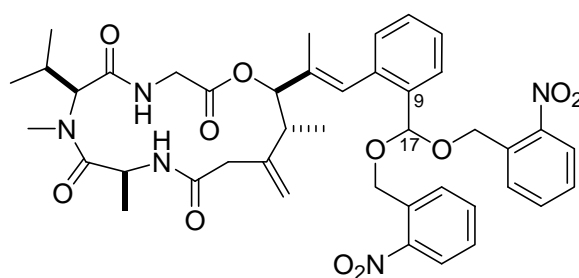

***o*-[Bis(*o*-nitrobenzyloxy)methyl]-styrene-analogue 2d.** To a mixture of **3** (7.7 mg, 14.4  $\mu$ mol) and boronic ester **6d** (20 mg, 38.5  $\mu$ mol) were added dry THF (150  $\mu$ L), PdCl<sub>2</sub>(dppf)·CH<sub>2</sub>Cl<sub>2</sub> (3.0 mg, 3.6  $\mu$ mol), Cs<sub>2</sub>CO<sub>3</sub> (9.4 mg, 28.9  $\mu$ mol) and Ph<sub>3</sub>As (2.2 mg, 7.2  $\mu$ mol) at room temperature. The reaction mixture was stirred at room temperature for 24 h in the dark and filtrated through a pad of Celite with Et<sub>2</sub>O. The filtrate was concentrated. The residue was purified with flash column chromatography on Florisil (hexane/AcOEt = 5/1 to 1/2) and HPLC (column: Inertsil ODS-3  $\phi$ 10 x 250 mm, flow rate: 2 mL/min, detection: UV 210 nm, eluent: MeCN/H<sub>2</sub>O = 4/1, *T<sub>R</sub>* = 21.8 min) to give 5.5 mg of **2d** (48%): colorless solid;  $[\alpha]_D^{17.6} = -86^\circ$  (*c* 0.28, MeOH); IR (film)  $\nu$  3275, 2964, 1734, 1685, 1647, 1525, 1457, 1340, 1258 cm<sup>-1</sup>; <sup>1</sup>H NMR (500 MHz, CD<sub>3</sub>OD)  $\delta$  0.86 (3H, d, *J* = 6.9 Hz,

H15'), 0.95 (3H, d,  $J = 6.9$  Hz, H14'), 0.97 (3H, d,  $J = 7.5$  Hz, H13), 1.36 (3H, d,  $J = 6.9$  Hz, H11'), 1.46 (3H, d,  $J = 1.1$  Hz, H14), 2.29 (1H, dq,  $J = 10.9, 6.9, 6.9$  Hz, H13'), 2.36 (1H, dq,  $J = 11.4, 7.5$  Hz, H4), 2.68 (3H, s, H12'), 2.90 (1H, d,  $J = 13.2$  Hz, H2), 3.15 (1H, d,  $J = 13.2$  Hz, H2), 3.51 (1H, d,  $J = 18.3$  Hz, H8'), 4.449 (1H, d,  $J = 10.9$  Hz, H5'), 4.453 (1H, d,  $J = 18.3$  Hz, H8'), 4.91 (1H, s, OCH<sub>2</sub>C<sub>6</sub>H<sub>4</sub>NO<sub>2</sub>), 4.92 (1H, s, OCH<sub>2</sub>C<sub>6</sub>H<sub>4</sub>NO<sub>2</sub>), 4.946 (1H, s, OCH<sub>2</sub>C<sub>6</sub>H<sub>4</sub>NO<sub>2</sub>), 4.954 (1H, s, OCH<sub>2</sub>C<sub>6</sub>H<sub>4</sub>NO<sub>2</sub>), 5.02 (1H, s, H12), 5.05 (1H, s, H12), 5.30 (1H, d,  $J = 11.4$  Hz, H5), 5.37 (1H, q,  $J = 6.9$  Hz, H2'), 5.86 (1H, s, H17), 6.75 (1H, d,  $J = 1.1$  Hz, H7), 7.11 (1H, dd,  $J = 5.7, 3.4$  Hz, H16), 7.35 (2H, dd,  $J = 5.7, 3.4$  Hz, H11, H15), 7.48 (2H, td,  $J = 8.0, 1.7$  Hz, OCH<sub>2</sub>C<sub>6</sub>H<sub>4</sub>NO<sub>2</sub>), 7.63 (1H, td,  $J = 8.0, 1.7$  Hz, OCH<sub>2</sub>C<sub>6</sub>H<sub>4</sub>NO<sub>2</sub>), 7.65 (1H, td,  $J = 8.0, 1.7$  Hz, OCH<sub>2</sub>C<sub>6</sub>H<sub>4</sub>NO<sub>2</sub>), 7.68 (1H, dd,  $J = 8.0, 1.7$  Hz, OCH<sub>2</sub>C<sub>6</sub>H<sub>4</sub>NO<sub>2</sub>), 7.70 (1H, dd,  $J = 5.7, 3.4$  Hz, H10), 7.74 (1H, dd,  $J = 8.0, 1.7$  Hz, OCH<sub>2</sub>C<sub>6</sub>H<sub>4</sub>NO<sub>2</sub>), 7.99 (1H, dd,  $J = 8.0, 1.7$  Hz, OCH<sub>2</sub>C<sub>6</sub>H<sub>4</sub>NO<sub>2</sub>), 8.00 (1H, dd,  $J = 8.0, 1.7$  Hz, OCH<sub>2</sub>C<sub>6</sub>H<sub>4</sub>NO<sub>2</sub>); <sup>13</sup>C NMR (125 MHz, CD<sub>3</sub>OD) δ 13.2, 18.6, 18.8, 19.1, 19.3, 27.5, 29.3, 39.7, 41.9, 44.5, 53.6, 66.5, 67.8, 84.4, 102.2, 125.5, 125.6, 127.56, 127.62, 129.4, 129.5, 129.8, 130.4, 134.6, 135.3, 135.4, 136.6, 137.1, 147.6, 149.1, 147.6, 149.07, 149.09, 169.4, 169.7, 173.0, 175.3; HRMS (ESI-TOF) calcd for C<sub>42</sub>H<sub>49</sub>N<sub>5</sub>O<sub>11</sub>Na 822.3321 (M+Na<sup>+</sup>), found 822.3327.

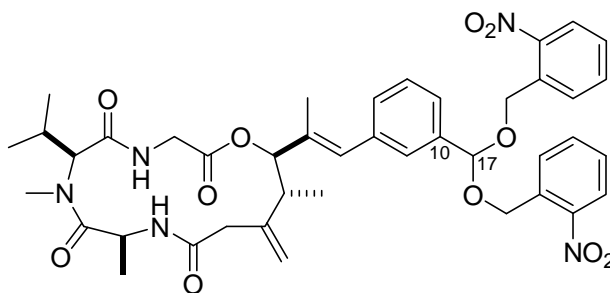

***m*-[Bis-(*o*-nitrobenzyloxy)methyl]-styrene-analogue 2e.** 2e was obtained in 36% yield by following the procedure of 2d. Colorless solid;  $[\alpha]_D^{26.8} = -142^\circ$  ( $c$  0.065, MeOH); IR (film)  $\nu$  3285, 2962, 1729, 1641, 1527, 1342, 1261, 1032 cm<sup>-1</sup>; <sup>1</sup>H NMR (500 MHz, CD<sub>3</sub>OD) δ 0.90 (3H, d,  $J = 6.9$  Hz, H15'), 0.97 (3H, d,  $J = 6.3$  Hz, H14'), 1.00 (3H, d,  $J = 6.9$  Hz, H13), 1.39 (3H, d,  $J = 6.8$  Hz, H11'), 1.70 (3H, d,  $J = 1.1$  Hz, H14), 2.35 (1H, dq,  $J = 10.9, 6.9, 6.3$  Hz, H13'), 2.41 (1H, dq,  $J = 11.5, 6.9$  Hz, H4), 2.81 (3H, s, H12'), 2.91 (1H, d,  $J = 12.6$  Hz, H2), 3.17 (1H, d,  $J = 12.6$  Hz, H2), 3.55 (1H, d,  $J = 18.3$  Hz, H8'), 4.49 (1H, d,  $J = 10.9$  Hz, H5'), 4.53 (1H, d,  $J = 18.3$  Hz, H8'), 4.94 (4H, s, OCH<sub>2</sub>C<sub>6</sub>H<sub>4</sub>NO<sub>2</sub>), 5.04 (1H, s, H12), 5.07 (1H, s, H12), 5.35 (1H, d,  $J = 11.5$  Hz, H5), 5.43 (1H, q,  $J = 6.9$  Hz, H2'), 5.88 (1H, s, H17), 6.62 (1H, d,  $J = 1.1$  Hz, H7), 7.26 (1H, d,  $J = 7.4$  Hz, H16), 7.37 (1H, t,  $J = 7.4$  Hz, H15), 7.41 (1H, d,  $J = 7.4$  Hz, H11), 7.45 (1H, s, H9), 7.49 (2H, td, 8.0, 1.1 Hz, OCH<sub>2</sub>C<sub>6</sub>H<sub>4</sub>NO<sub>2</sub>), 7.66 (2H, td,  $J = 8.0, 1.1$  Hz, OCH<sub>2</sub>C<sub>6</sub>H<sub>4</sub>NO<sub>2</sub>), 7.75 (2H, dd,  $J = 8.0, 1.1$  Hz, OCH<sub>2</sub>C<sub>6</sub>H<sub>4</sub>NO<sub>2</sub>), 7.99 (2H, dd,  $J = 8.0, 1.1$  Hz, OCH<sub>2</sub>C<sub>6</sub>H<sub>4</sub>NO<sub>2</sub>); <sup>13</sup>C NMR (125 MHz, CD<sub>3</sub>OD) δ 13.8, 18.6, 18.8, 19.1, 19.2, 27.5, 29.5, 39.9, 41.9, 44.4, 46.4, 65.65, 65.68, 67.9, 84.9, 103.5, 113.5, 114.4, 125.6, 126.5, 128.3, 129.4, 129.51, 129.55, 130.5, 130.7, 131.9, 134.6, 135.1, 135.2, 135.6, 138.3, 139.0, 147.6, 148.0, 149.21, 149.24, 169.4, 170.3, 173.1, 175.3; HRMS (ESI-TOF) calcd for C<sub>42</sub>H<sub>49</sub>N<sub>5</sub>O<sub>11</sub>Na 822.3321 (M+Na<sup>+</sup>), found 822.3327.

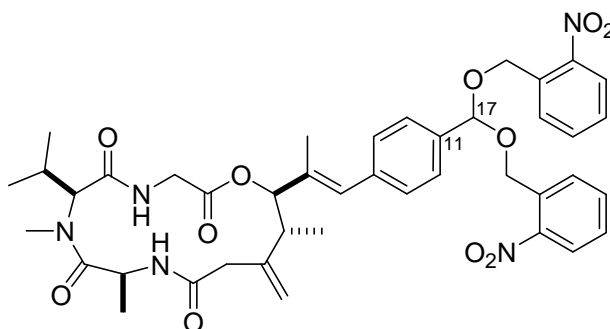

***p*-[Bis(*o*-nitrobenzyloxy)methyl]-styrene-analogue 2f.** **2f** was obtained in 73% yield by following the procedure of **2d**. Colorless solid;  $[\alpha]_D^{15.2} = -87^\circ$  ( $c$  0.42, MeOH); IR (film)  $\nu$  3276, 2964, 1735, 1644, 1526, 1341, 1268, 1034  $\text{cm}^{-1}$ ;  $^1\text{H}$  NMR (500 MHz,  $\text{CD}_3\text{OD}$ )  $\delta$  0.89 (3H, d,  $J = 6.9$  Hz, H15'), 0.97 (3H, d,  $J = 6.8$  Hz, H14'), 0.99 (3H, d,  $J = 6.9$  Hz, H13), 1.39 (3H, d,  $J = 6.8$  Hz, H11'), 1.71 (3H, d,  $J = 1.1$  Hz, H14), 2.36 (1H, dq,  $J = 10.9, 6.9, 6.8$  Hz, H13'), 2.40 (1H, dq,  $J = 10.9, 6.9$  Hz, H4), 2.83 (3H, s, H12'), 2.91 (1H, d,  $J = 13.2$  Hz, H2), 3.16 (1H, d,  $J = 13.2$  Hz, H2), 3.54 (1H, d,  $J = 18.9$  Hz, H8'), 4.49 (1H, d,  $J = 10.9$  Hz, H5'), 4.52 (1H, d,  $J = 18.9$  Hz, H8'), 4.92 (4H, s, OCH<sub>2</sub>C<sub>6</sub>H<sub>4</sub>NO<sub>2</sub>), 5.03 (1H, s, H12), 5.06 (1H, s, H12), 5.35 (1H, d,  $J = 10.9$  Hz, H5), 5.43 (1H, q,  $J = 6.9$  Hz, H2'), 5.85 (1H, s, H17), 6.61 (1H, d,  $J = 1.1$  Hz, H7), 7.30 (2H, d,  $J = 8.0$  Hz, H9, H16), 7.46 (2H, td,  $J = 8.6, 1.1$  Hz, OCH<sub>2</sub>C<sub>6</sub>H<sub>4</sub>NO<sub>2</sub>), 7.49 (2H, d,  $J = 8.0$  Hz, H10, H15), 7.64 (2H, td,  $J = 8.6, 1.1$  Hz, OCH<sub>2</sub>C<sub>6</sub>H<sub>4</sub>NO<sub>2</sub>), 7.75 (2H, dd,  $J = 8.6, 1.1$  Hz, OCH<sub>2</sub>C<sub>6</sub>H<sub>4</sub>NO<sub>2</sub>), 7.97 (2H, dd,  $J = 8.6, 1.1$  Hz, OCH<sub>2</sub>C<sub>6</sub>H<sub>4</sub>NO<sub>2</sub>);  $^{13}\text{C}$  NMR (125 MHz,  $\text{CD}_3\text{OD}$ )  $\delta$  13.8, 18.6, 18.8, 19.1, 19.2, 27.5, 29.4, 39.9, 41.9, 44.4, 46.4, 65.6, 67.9, 84.9, 85.2, 103.4, 113.5, 125.5, 127.8, 129.5, 130.1, 130.5, 131.8, 134.6, 135.2, 135.7, 137.7, 138.8, 147.6, 149.2, 169.3, 170.2, 173.0, 175.3; HRMS (ESI-TOF) calcd for C<sub>42</sub>H<sub>49</sub>N<sub>5</sub>O<sub>11</sub>Na 822.3321 (M+Na<sup>+</sup>), found 822.3317.

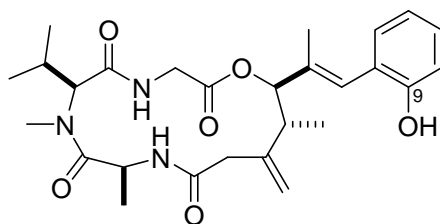

***o*-Hydroxy-styrene-analogue 7a.** A solution of **2a** (1.56 mg, 2.46  $\mu\text{mol}$ ) in  $\text{CD}_3\text{OD}$  (600  $\mu\text{L}$ ) in NMR tube was irradiated with UV light ( $\lambda = 365$  nm) using handy UV lamp (AS ONE, SLUV-6, 6 W) at room temperature for 1.5 h. The mixture was concentrated. The residue was purified with flash column chromatography on silica gel (hexane/AcOEt = 1.5/1 to 1/1) and HPLC (column: Inertsil ODS-3  $\phi$ 10 x 250 mm, flow rate: 2 mL/min, detection: UV 254 nm, eluent: MeOH/H<sub>2</sub>O = 2.5/1,  $T_R = 19.9$  min) to give 0.73 mg of **7a** (60%): colorless solid;  $[\alpha]_D^{23.7} = -139^\circ$  ( $c$  0.063, MeOH); IR (film)  $\nu$  3280, 2966, 1734, 1625, 1558, 1454, 1261, 960, 756  $\text{cm}^{-1}$ ;  $^1\text{H}$  NMR (500 MHz,  $\text{CDCl}_3$ )  $\delta$  0.86 (3H, d,  $J = 6.8$  Hz, H15'), 0.97 (3H, d,  $J = 6.8$  Hz, H14'), 1.03 (3H, d,  $J = 7.5$  Hz, H13), 1.44 (3H, d,  $J = 6.9$  Hz, H11'), 1.70 (3H, s, H14), 2.37 (1H, dq,  $J = 11.5, 7.5$  Hz, H4), 2.41 (1H, dq,  $J = 10.9, 6.8, 6.8$  Hz, H13'), 2.74 (3H, s, H12'), 2.88 (1H, d,  $J = 13.2$  Hz, H2), 3.03 (1H, d,  $J = 13.2$  Hz, H2), 3.52 (1H, dd,  $J = 18.9, 1.7$  Hz, H8'), 4.21 (1H, d,  $J = 10.9$  Hz, H5'), 4.67 (1H, dd,  $J = 18.9, 10.3$  Hz, H8'), 5.04 (1H, s, H12), 5.11 (1H, s, H12), 5.33 (1H, d,  $J = 11.5$  Hz, H5), 5.35 (1H, dq,  $J = 9.8, 6.9$  Hz, H2'), 6.55 (1H, s, H7), 6.58 (1H, br, OH), 6.62

(1H, d,  $J = 9.8$  Hz, H1'), 6.87 (1H, t,  $J = 7.4$  Hz, CHC6H4OH), 6.90 (1H, d,  $J = 8.6$  Hz, CHC6H4OH), 7.10 (1H, dd,  $J = 7.4, 1.1$  Hz, CHC6H4OH), 7.16 (1H, ddd,  $J = 8.6, 7.4, 1.1$  Hz, CHC6H4OH), 8.00 (1H, dd,  $J = 10.3, 1.7$  Hz, H7');  $^{13}\text{C}$  NMR (125 MHz,  $\text{CDCl}_3$ )  $\delta$  15.2, 18.58, 18.64, 19.1, 19.3, 25.9, 29.0, 39.7, 41.2, 43.3, 46.6, 67.4, 81.1, 114.2, 116.3, 119.9, 123.0, 124.3, 128.9, 129.8, 136.8, 144.7, 153.9, 167.6, 168.3, 171.2, 173.8; HRMS (ESI-TOF) calcd for  $\text{C}_{27}\text{H}_{37}\text{N}_3\text{O}_6\text{Na}$  522.2575 ( $\text{M}+\text{Na}^+$ ), found 522.2578.

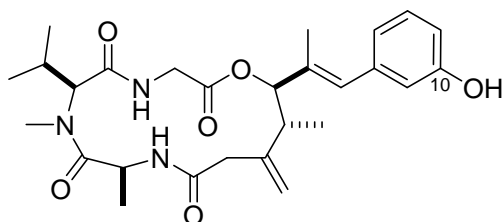

***m*-Hydroxy-styrene-analogue 7b.** **7b** was obtained in 59% yield by following the procedure of **7a**. Colorless solid;  $[\alpha]_{\text{D}}^{17.5} = -285^\circ$  ( $c$  0.016, MeOH); IR (film)  $\nu$  3283, 2967, 1734, 1623, 1456, 1269, 962, 909, 731  $\text{cm}^{-1}$ ;  $^1\text{H}$  NMR (500 MHz,  $\text{CDCl}_3$ )  $\delta$  0.87 (3H, d,  $J = 6.9$  Hz, H15'), 0.88 (3H, d,  $J = 6.9$  Hz, H13), 0.98 (3H, d,  $J = 6.9$  Hz, H14'), 1.44 (3H, d,  $J = 6.8$  Hz, H11'), 1.70 (3H, d,  $J = 1.1$  Hz, H14), 2.26 (1H, dq,  $J = 11.5, 6.9$  Hz, H4), 2.44 (1H, dq,  $J = 10.9, 6.9, 6.9$  Hz, H13'), 2.86 (3H, s, H12'), 2.87 (1H, d,  $J = 13.2$  Hz, H2), 3.02 (1H, d,  $J = 13.2$  Hz, H2), 3.52 (1H, dd,  $J = 18.3, 1.7$  Hz, H8'), 4.27 (1H, d,  $J = 10.9$  Hz, H5'), 4.70 (1H, dd,  $J = 18.3, 10.3$  Hz, H8'), 5.05 (1H, s, H12), 5.09 (1H, s, H12), 5.32 (1H, d,  $J = 11.5$  Hz, H5), 5.37 (1H, dq,  $J = 9.1, 6.8$  Hz, H2'), 6.18 (1H, br, OH), 6.51 (1H, d,  $J = 1.1$  Hz, H7), 6.71 (1H, dd,  $J = 8.0, 1.7$  Hz, H11), 6.75 (1H, d,  $J = 9.1$  Hz, H1'), 6.77 (1H, d,  $J = 8.0$  Hz, H16), 6.80 (1H, d,  $J = 1.7$  Hz, H9), 7.17 (1H, t,  $J = 8.0$  Hz, H15), 8.03 (1H, dd,  $J = 10.3, 1.7$  Hz, H7');  $^{13}\text{C}$  NMR (125 MHz,  $\text{CDCl}_3$ )  $\delta$  13.1, 18.5, 18.6, 18.8, 19.3, 26.1, 28.8, 39.0, 41.1, 43.2, 50.9, 67.2, 83.0, 113.9, 114.0, 115.6, 121.7, 129.4, 130.8, 133.5, 138.1, 144.6, 155.5, 167.5, 167.8, 171.1, 179.0; HRMS (ESI-TOF) calcd for  $\text{C}_{27}\text{H}_{37}\text{N}_3\text{O}_6\text{Na}$  522.2575 ( $\text{M}+\text{Na}^+$ ), found 522.2570.

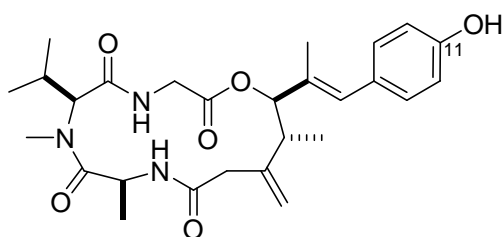

***p*-Hydroxy-styrene-analogue 7c.** **7c** was obtained in 62% yield by following the procedure of **7a**. Colorless solid;  $[\alpha]_{\text{D}}^{17.2} = -177^\circ$  ( $c$  0.020, MeOH); IR (film)  $\nu$  3280, 2927, 1624, 1513, 1456, 1263, 960, 906, 731  $\text{cm}^{-1}$ ;  $^1\text{H}$  NMR (500 MHz,  $\text{CDCl}_3$ )  $\delta$  0.78 (3H, d,  $J = 6.8$  Hz, H13), 0.87 (3H, d,  $J = 6.9$  Hz, H15'), 0.98 (3H, d,  $J = 6.8$  Hz, H14'), 1.45 (3H, d,  $J = 6.9$  Hz, H11'), 1.63 (3H, s, H14), 2.15 (1H, dq,  $J = 11.5, 6.8$  Hz, H4), 2.44 (1H, dq,  $J = 10.9, 6.9, 6.8$  Hz, H13'), 2.84 (1H, d,  $J = 13.2$  Hz, H2), 2.89 (3H, s, H12'), 3.01 (1H, d,  $J = 13.2$  Hz, H2), 3.51 (1H, dd,  $J = 18.9, 1.7$  Hz, H8'), 4.29 (1H, d,  $J = 10.9$  Hz, H5'), 4.70 (1H, dd,  $J = 18.9, 10.3$  Hz, H8'), 5.03 (1H, s, H12), 5.07 (1H, s, H12), 5.29 (1H, d,  $J = 11.5$  Hz, H5), 5.38 (1H, dq,  $J = 6.9$  Hz, H2'), 6.46 (1H, s, H7), 6.81 (3H, d,  $J = 9.1$  Hz, H1', CHC6H4OH), 7.13 (2H, d,  $J = 9.1$  Hz, CHC6H4OH), 8.03 (1H, dd,  $J = 10.3, 1.7$  Hz, H7'); HRMS (ESI-TOF) calcd for  $\text{C}_{27}\text{H}_{37}\text{N}_3\text{O}_6\text{Na}$  522.2575 ( $\text{M}+\text{Na}^+$ ), found 522.2575.

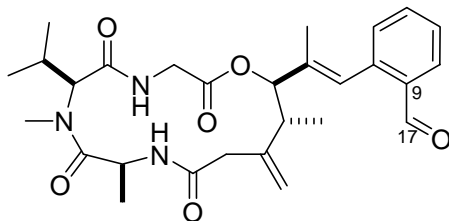

***o*-Formyl-styrene-analogue 7d.** **7d** was obtained as a 3:2 mixture of *E*- and *Z*-isomers at C6-C7-olefin by following the procedure of **7a**. *E*-isomer: Colorless solid;  $[\alpha]_D^{18.7} = -144^\circ$  (*c* 0.10, CHCl<sub>3</sub>); IR (film)  $\nu$  3281, 2924, 1687, 1640, 1542, 1456, 1259, 755 cm<sup>-1</sup>; <sup>1</sup>H NMR (500 MHz, CDCl<sub>3</sub>)  $\delta$  0.86 (3H, d, *J* = 6.8 Hz, H15'), 0.98 (3H, d, *J* = 6.9 Hz, H14'), 1.02 (3H, d, *J* = 7.4 Hz, H13), 1.42 (3H, d, *J* = 6.8 Hz, H11'), 1.52 (3H, s, H14), 2.28 (1H, dq, *J* = 11.5, 7.4 Hz, H4), 2.42 (1H, dqq, *J* = 11.5, 6.9, 6.8 Hz, H13'), 2.80 (3H, s, H12'), 2.86 (1H, d, *J* = 13.2 Hz, H2), 3.04 (1H, d, *J* = 13.2 Hz, H2), 3.54 (1H, dd, *J* = 18.3, 1.7 Hz, H8'), 4.24 (1H, d, *J* = 11.5 Hz, H5'), 4.73 (1H, dd, *J* = 18.3, 10.3 Hz, H8'), 5.09 (1H, s, H12), 5.12 (1H, s, H12), 5.35 (1H, dq, *J* = 9.7, 6.8 Hz, H2'), 5.41 (1H, d, *J* = 11.5 Hz, H5), 6.60 (1H, d, *J* = 9.7 Hz, H1'), 7.00 (1H, s, H7), 7.23 (1H, d, *J* = 8.0 Hz, H10), 7.40 (1H, t, *J* = 8.0 Hz, H15), 7.55 (1H, t, *J* = 8.0 Hz, H11), 7.89 (1H, d, *J* = 8.0 Hz, H16), 8.00 (1H, dd, *J* = 10.3, 1.7 Hz, H7'); <sup>13</sup>C NMR (125 MHz, CDCl<sub>3</sub>)  $\delta$  12.7, 18.58, 18.64, 18.8, 19.3, 26.1, 28.7, 39.0, 41.1, 43.1, 46.5, 67.1, 82.2, 114.1, 127.7, 128.1, 129.0, 130.5, 133.6, 133.7, 136.8, 139.6, 144.4, 167.7, 167.9, 170.9, 173.2, 191.9; HRMS (ESI-TOF) calcd for C<sub>28</sub>H<sub>37</sub>N<sub>3</sub>O<sub>6</sub>Na 534.2575 (M+Na<sup>+</sup>), found 534.2571.

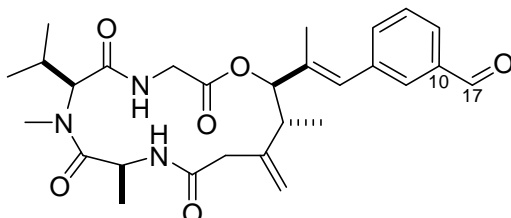

***m*-Formyl-styrene-analogue 7e** was obtained as a 3:1 mixture of *E*- and *Z*-isomers at C6-C7-olefin by following the procedure of **7a**. *E*-isomer: Colorless solid;  $[\alpha]_D^{19.4} = -172^\circ$  (*c* 0.10, CHCl<sub>3</sub>); IR (film)  $\nu$  3277, 2967, 1685, 1637, 1541, 1457, 1259 cm<sup>-1</sup>; <sup>1</sup>H NMR (500 MHz, CDCl<sub>3</sub>)  $\delta$  0.87 (3H, d, *J* = 6.9 Hz, H15'), 0.97 (3H, d, *J* = 5.7 Hz, H13), 0.98 (3H, d, *J* = 6.9 Hz, H14'), 1.44 (3H, d, *J* = 6.9 Hz, H11'), 1.74 (3H, d, *J* = 1.1 Hz, H14), 2.28 (1H, dq, *J* = 11.5, 5.7 Hz, H4), 2.43 (1H, dqq, *J* = 10.9, 6.9, 6.9 Hz, H13'), 2.84 (3H, s, H12'), 2.85 (1H, d, *J* = 13.2 Hz, H2), 3.04 (1H, d, *J* = 13.2 Hz, H2), 3.53 (1H, d, *J* = 18.9, 1.8 Hz, H8'), 4.24 (1H, d, *J* = 10.9 Hz, H5'), 4.71 (1H, d, *J* = 18.9, 10.3 Hz, H8'), 5.08 (1H, s, H12), 5.12 (1H, s, H12), 5.36 (1H, d, *J* = 11.5 Hz, H5), 5.37 (1H, dq, *J* = 9.7, 6.9 Hz, H2'), 6.59, (1H, d, *J* = 9.7 Hz, H1'), 6.65 (1H, s, H7), 7.50 (1H, t, *J* = 7.4 Hz, H15), 7.53 (1H, d, *J* = 7.4 Hz, H16), 7.75 (1H, d, *J* = 7.4 Hz, H11), 7.77 (1H, s, H9), 8.01 (1H, dd, *J* = 10.9, 1.8 Hz, H7'), 10.02 (1H, d, *J* = 4.0 Hz, H17); <sup>13</sup>C NMR (125 MHz, CDCl<sub>3</sub>)  $\delta$  13.0, 18.61, 18.64, 18.9, 19.3, 26.1, 28.7, 39.1, 41.1, 43.1, 46.6, 67.1, 82.7, 114.1, 128.1, 128.9, 129.9, 130.2, 135.0, 135.3, 136.3, 137.6, 144.4, 167.7, 167.9, 170.9, 173.2, 192.3; HRMS (ESI-TOF) calcd for C<sub>28</sub>H<sub>37</sub>N<sub>3</sub>O<sub>6</sub>Na 534.2575 (M+Na<sup>+</sup>), found 534.2573.

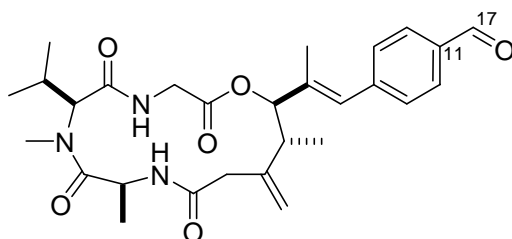

***p*-Formylstyrene-analogue 7f.** **7f** was obtained as a 2:1 mixture of *E*- and *Z*-isomers at C6-C7-olefin by following the procedure of **7a**. *E*-isomer: colorless solid; IR (film)  $\nu$  3280, 2927, 1688, 1640, 1552, 1457, 1259, 1169, 977, 757  $\text{cm}^{-1}$ ;  $^1\text{H}$  NMR (500 MHz,  $\text{CDCl}_3$ )  $\delta$  0.87 (3H, d,  $J = 7.5$  Hz, H15'), 0.96 (3H, d,  $J = 6.9$  Hz, H13), 0.98 (3H, d,  $J = 6.9$  Hz, H14'), 1.44 (3H, d,  $J = 6.9$  Hz, H11'), 1.76 (3H, d,  $J = 1.1$  Hz, H14), 2.27 (1H, dq,  $J = 11.5, 6.9$  Hz, H4), 2.43 (1H, dq,  $J = 11.5, 7.5, 6.9$  Hz, H13'), 2.84 (3H, s, H12'), 2.85 (1H, d,  $J = 13.2$  Hz, H2), 3.04 (1H, d,  $J = 13.2$  Hz, H2), 3.53 (1H, dd,  $J = 18.9, 1.7$  Hz, H8'), 4.24 (1H, d,  $J = 11.5$  Hz, H5'), 4.71 (1H, d,  $J = 18.9, 10.3$  Hz, H8'), 5.07 (1H, s, H12), 5.12 (1H, s, H12), 5.35 (1H, d,  $J = 11.5$  Hz, H5), 5.37 (1H, dq,  $J = 9.1, 6.9$  Hz, H2'), 6.59 (1H, d,  $J = 9.1$  Hz, H1'), 6.64 (1H, d,  $J = 1.1$  Hz, H7), 7.43 (2H, d,  $J = 8.6$  Hz), 7.84 (2H, d,  $J = 8.6$  Hz), 8.01 (1H, dd,  $J = 10.3, 1.7$  Hz, H7'), 9.99 (1H, s, H17); HRMS (ESI-TOF) calcd for  $\text{C}_{28}\text{H}_{37}\text{N}_3\text{O}_6\text{Na}$  534.2575 ( $\text{M}+\text{Na}^+$ ), found 534.2578.

#### Neurotoxicity assay against Neuro 2a mouse neuroblastoma

Neuro 2a cells (ATCC, CCL131), obtained from Institute of Development Aging and Cancer (Tohoku university), were grown and maintained in 75  $\text{cm}^2$  tissue culture flasks (Falcon) at 37  $^\circ\text{C}$  in a humidified 5%  $\text{CO}_2$  atmosphere using a growth medium, which was composed of RPMI 1640 medium supplemented with 10% heat inactivated fetal bovine serum (Gibco), 2 mM L-glutamine, and 1% of antibiotic antifungal solution (10000 U/ml penicillin G, 10 mg/ml streptomycin).

Cells were harvested in trypsin-EDTA solution (0.5% – 0.2%, 5 min at room temperature), and diluted to a concentration of  $4 \times 10^5$  cell/mL with the growth medium. 100  $\mu\text{L}$  of the cell suspension was inoculated into each well of a 96-well microplate (Falcon) and mixed with 100  $\mu\text{L}$  of a solution of antillatoxin analogue to give a range of final concentrations between  $10^{-4}$  and  $10^{-9}$  M. The solutions of antillatoxin analogue were prepared from 100  $\mu\text{M}$  DMSO stock solutions by sequential dilution with the growth media containing veratridine (40  $\mu\text{M}$ ), a site 2-specific sodium channel activator, ouabain (88  $\mu\text{M}$ ), a blocker of the  $\text{Na}^+/\text{K}^+$  ATPase, and DMSO (2 v/v%). Three replicate samples were prepared for each antillatoxin analogues. For the experiments of Figure 2, the 96-well microplate was irradiated with UV light ( $\lambda = 365$  nm) using handy UV lamp (AS ONE, SLUV-6, 6 W) at room temperature for 30 min (Figure S1). After incubation for 20 hours at 37  $^\circ\text{C}$ , cells were treated with 50  $\mu\text{L}$  of 100  $\mu\text{M}$ /3 mM PMS/XTT-containing growth medium, followed by further incubation for 4 hours. Absorbance at 490 nm was measured on the microplate reader Model 550 (Bio Rad). The  $\text{EC}_{50}$  values were calculated using Prism v. 4.0 (GraphPad).



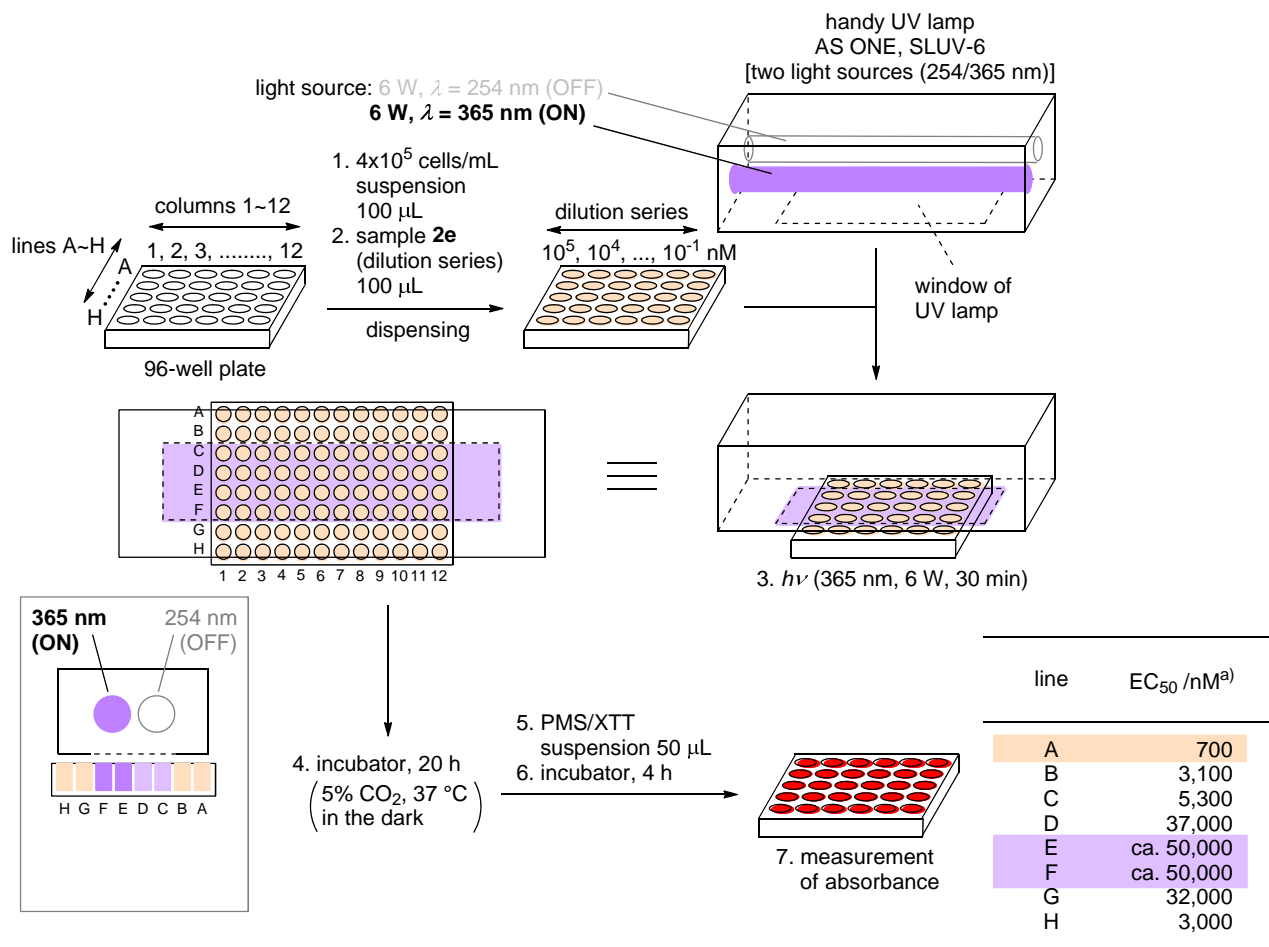

**Figure S1.** Experimental procedure for the cytotoxicity assay of UV-pre-irradiated **2e**. Magnitude of the EC<sub>50</sub> values correlated to distance between the lines and the light source of 365 nm. The data of line A, which was kept in the dark, represented the control experiment, and the data of lines E and F, which were closest from the light source, represented the UV pre-irradiated experiment.

C:\Documents and Settings\PC-USER\My Documents\Data\okura\ATX\ECX and ECA\als\KO-ATX-Me-Me-1H.als

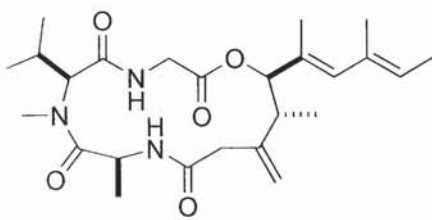

**5a**

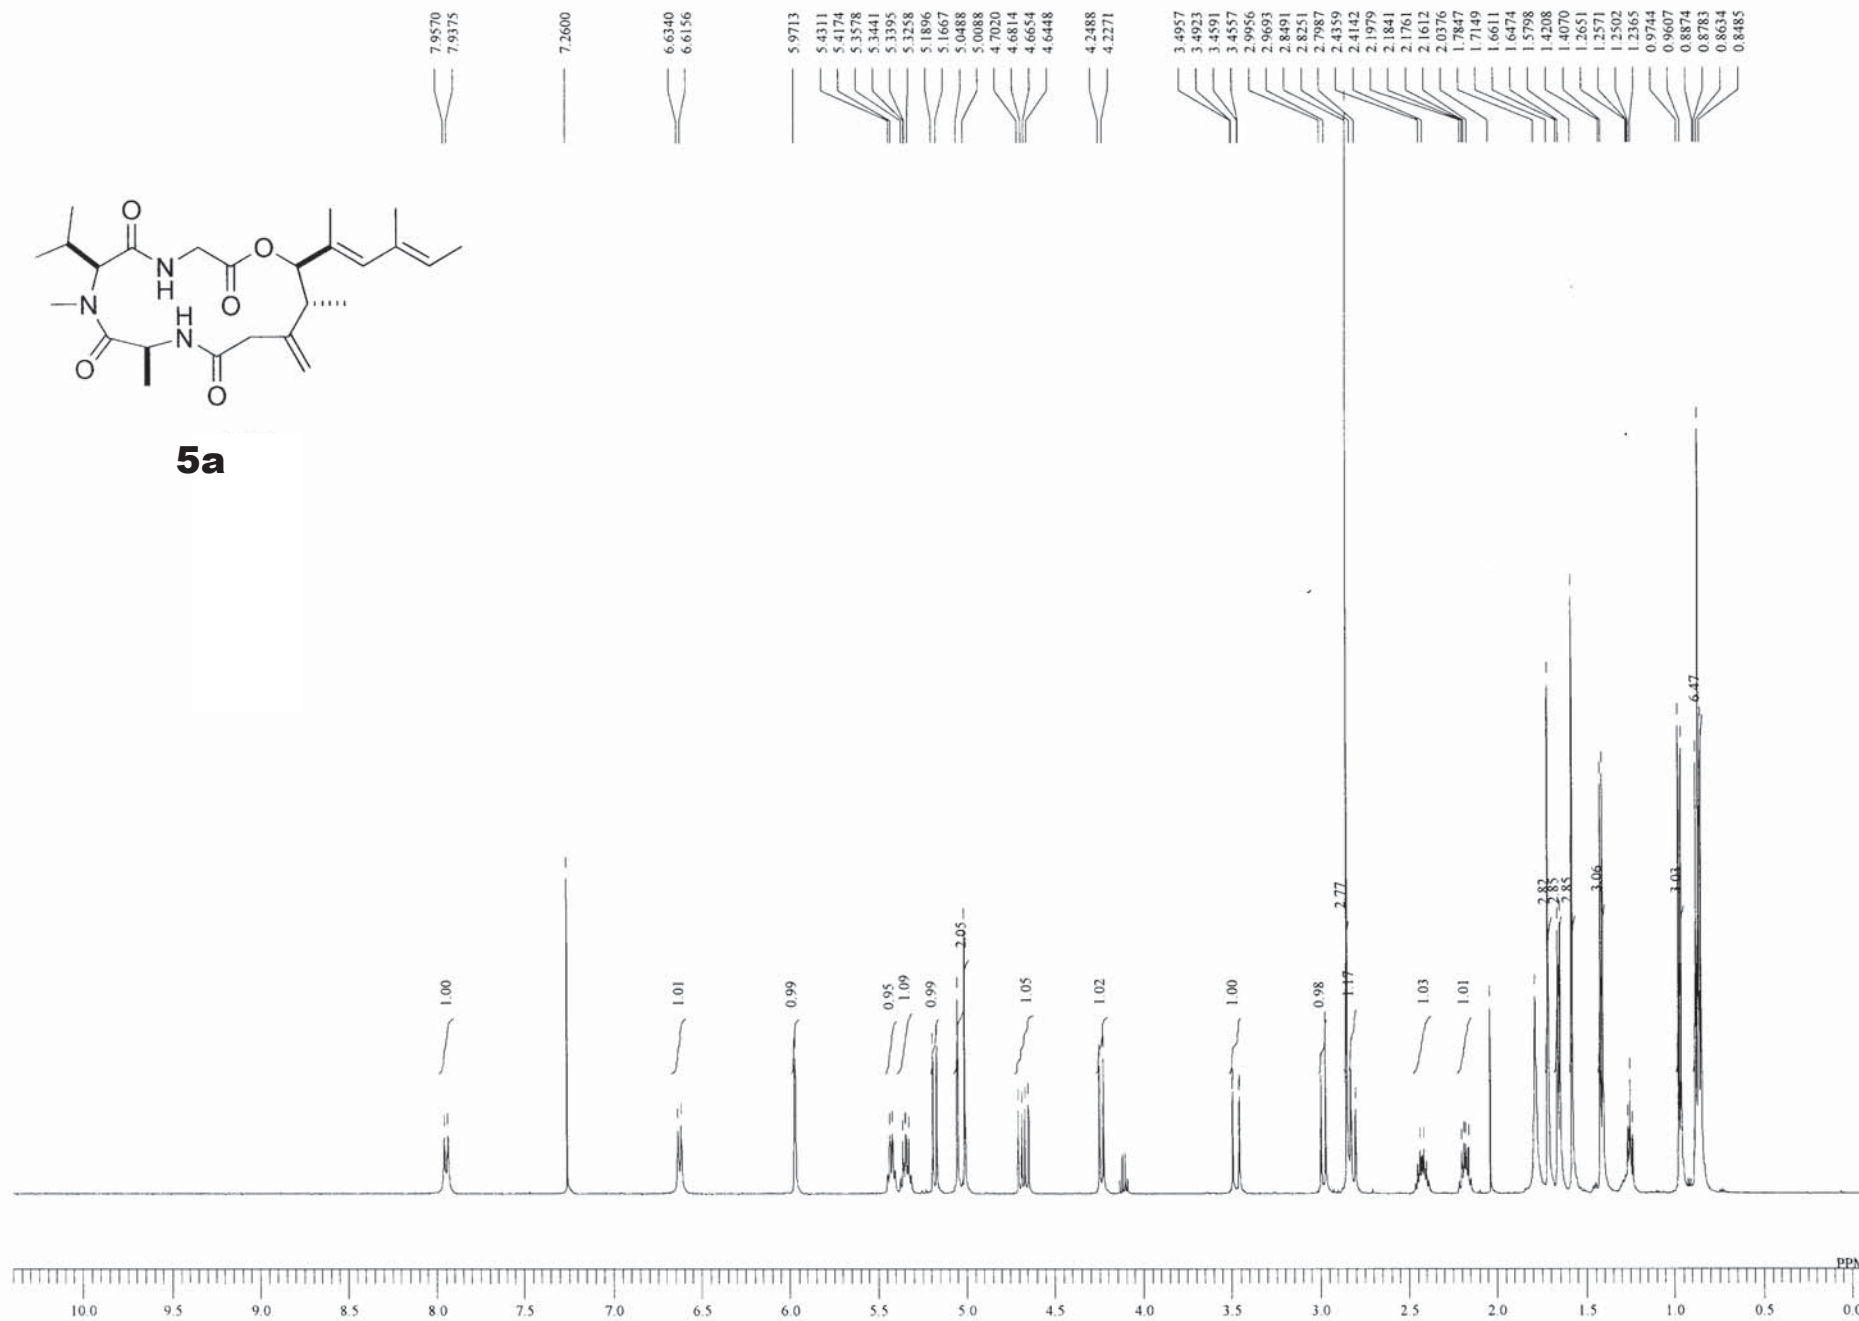

|       |                     |
|-------|---------------------|
| DATIM | 18-08-2010 19:35:37 |
| MENUP |                     |
| OBNUC | <sup>1</sup> H      |
| OFR   | 490.15 MHz          |
| OBSET | 9.16 KHz            |
| OBFIN | 7.60 Hz             |
| PW1   | 8.55 usec           |
| DEADT | 0.00 usec           |
| PREDL | 0.00000 msec        |
| IWT   | 1.0000 sec          |
| POINT | 13107               |
| SPO   | 13107               |
| TIMES | 8                   |
| DUMMY | 1                   |
| FREQU | 7352.83 Hz          |
| FLT   | 37000 Hz            |
| DELAY | 13.52 usec          |
| ACQTM | 1.7826 sec          |
| PD    | 1.5000 sec          |
| ADBIT | 16                  |
| RGAIN | 36                  |
| BF    | 0.01 Hz             |
| T1    | 0.00                |
| T2    | 0.00                |
| T3    | 90.00               |
| T4    | 100.00              |
| EXMOD | single_pulse ex2    |
| EXPCM |                     |
| IRNUC | <sup>1</sup> H      |
| IFR   | 490.15 MHz          |
| IRSET | 9.16 KHz            |
| IRFIN | 7.60 Hz             |
| IRRPW | 92 usec             |
| IRATN | 79                  |
| DFILE | KO-ATX-Me-Me-1H.als |
| SF    |                     |
| LKSET | 70.30 KHz           |
| LKFIN | 32.5 Hz             |
| LKLEV | 0                   |
| LGAIN | 0                   |
| LKPHS | 0                   |
| LKSIG | 0                   |
| CSPED | 0 Hz                |
| FILDC |                     |
| FILDF |                     |

C:\Documents and Settings\PC-USER\My Documents\Data\okura\ATX\ECX and ECA\als\KO-ATX-Me-Me-13C.als

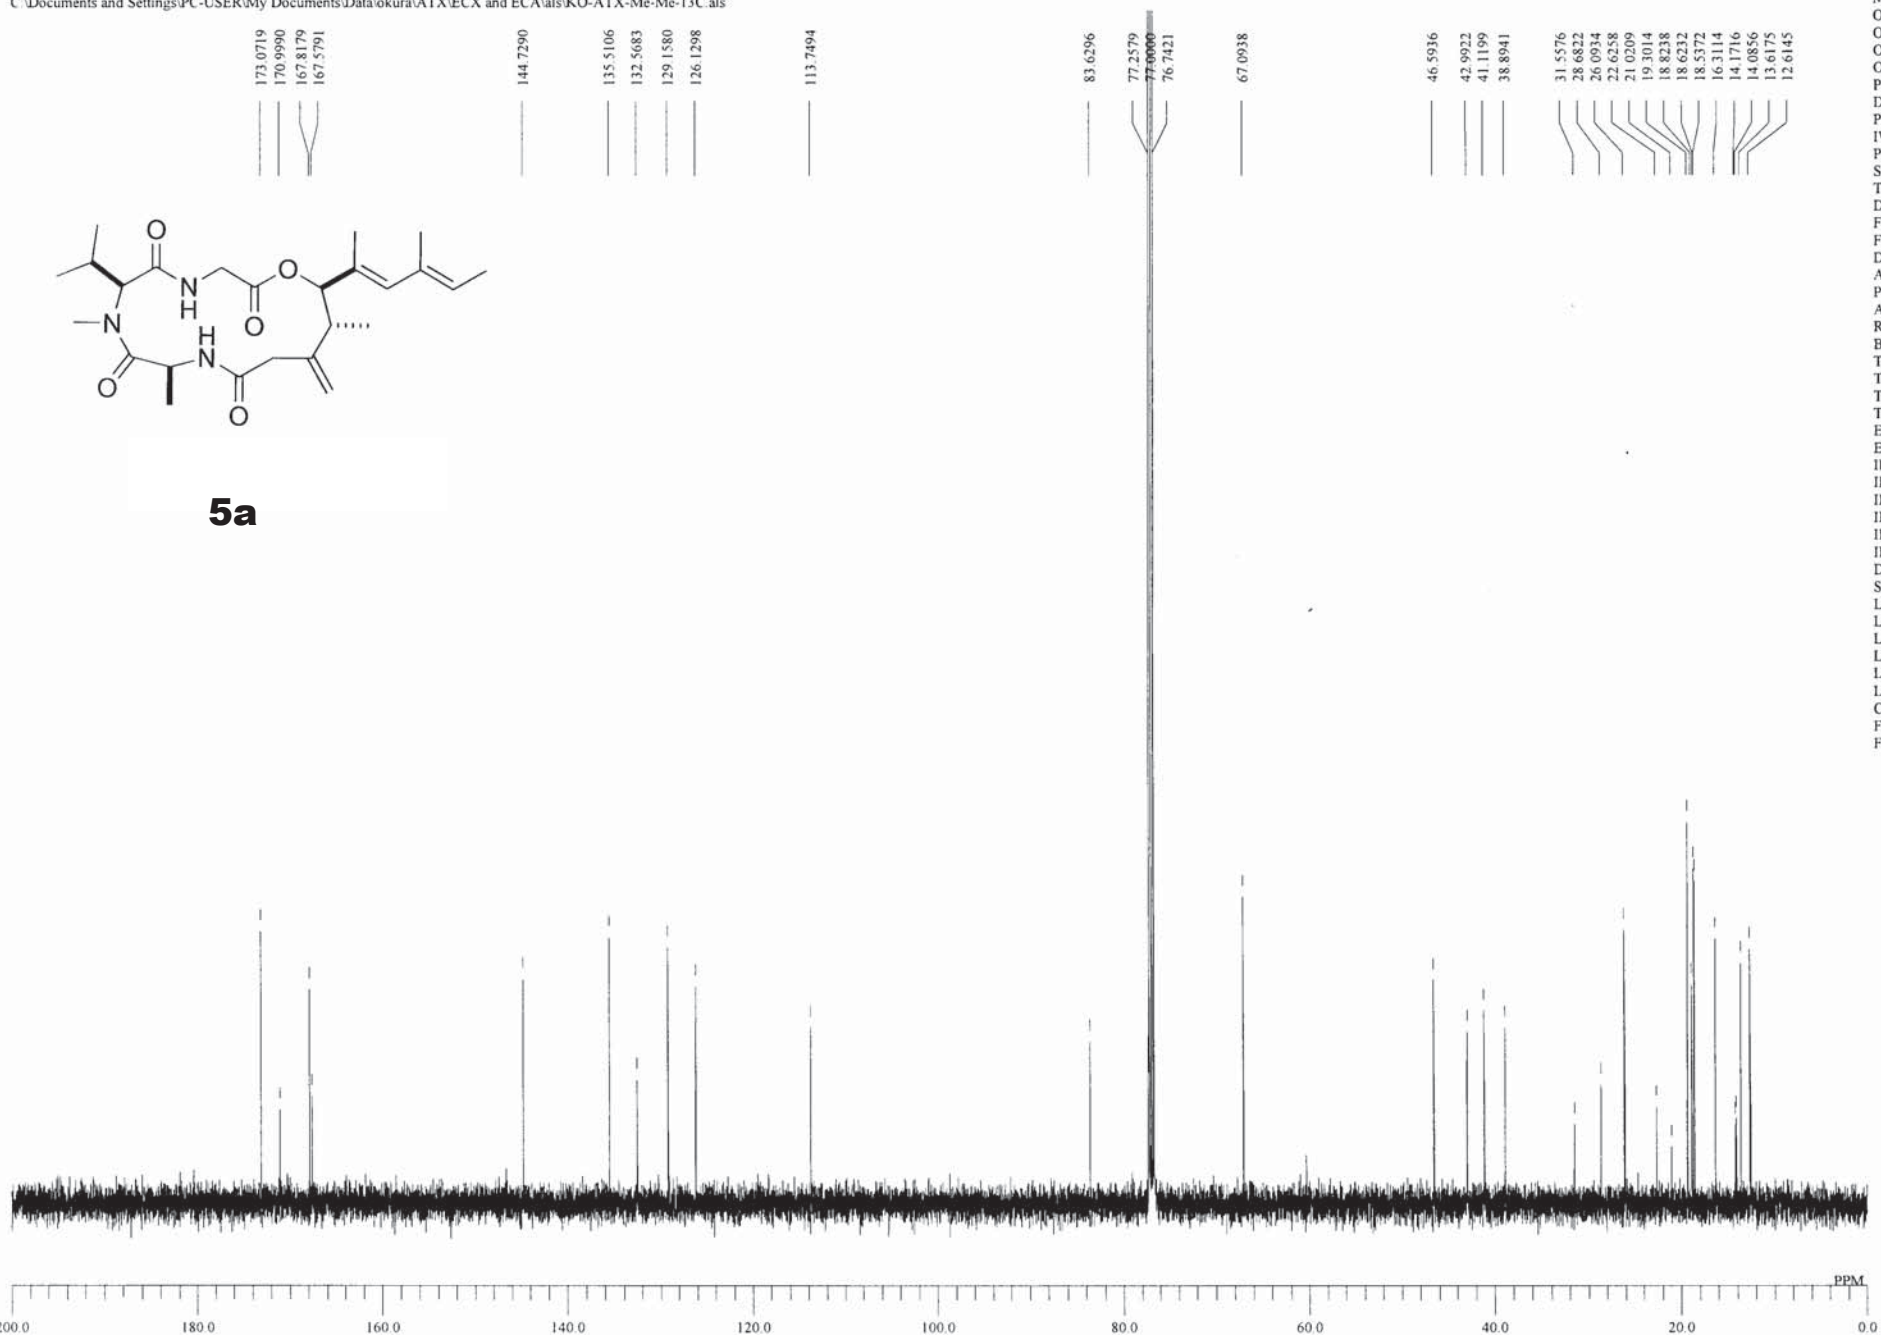

DATIM 18-08-2010 21:10:15  
MENUF  
OBNUC 13C  
OFR 123.26 MHz  
OBSET 2.31 KHz  
OBFIN 6.71 Hz  
PW1 3.20 usec  
DEADT 0.00 usec  
PREDL 0.00000 msec  
IWT 1.0000 sec  
POINT 26214  
SPO 26214  
TIMES 512  
DUMMY 4  
FREQU 30863.73 Hz  
FLT 155000 Hz  
DELAY 21.06 usec  
ACQTM 0.8493 sec  
PD 10.0000 sec  
ADBIT 16  
RGAIN 60  
BF 0.10 Hz  
T1 0.00  
T2 0.00  
T3 90.00  
T4 100.00  
EXMOD single\_pulse\_dec  
EXPCM  
IRNUC 1H  
IFR 490.15 MHz  
IRSET 9.16 KHz  
IRFIN 7.60 Hz  
IRRPW 92 usec  
IRATN 79  
DFILE KO-ATX-Me-Me-13C.als  
SF  
LKSET 70.30 KHz  
LKFIN 32.5 Hz  
LKLEV 0  
LGAIN 0  
LKPHS 0  
LKSIG 0  
CSPED 0 Hz  
FILDC  
FILDF

C:\Documents and Settings\PC-USER\My Documents\Data\okura\ATX\ECX and ECA\als\KO-ATX-Me-iPr-1H.als

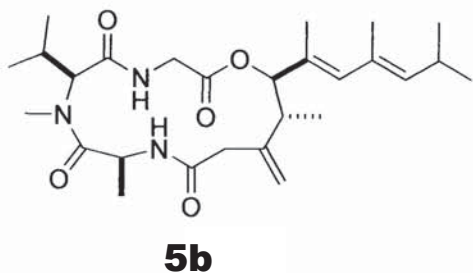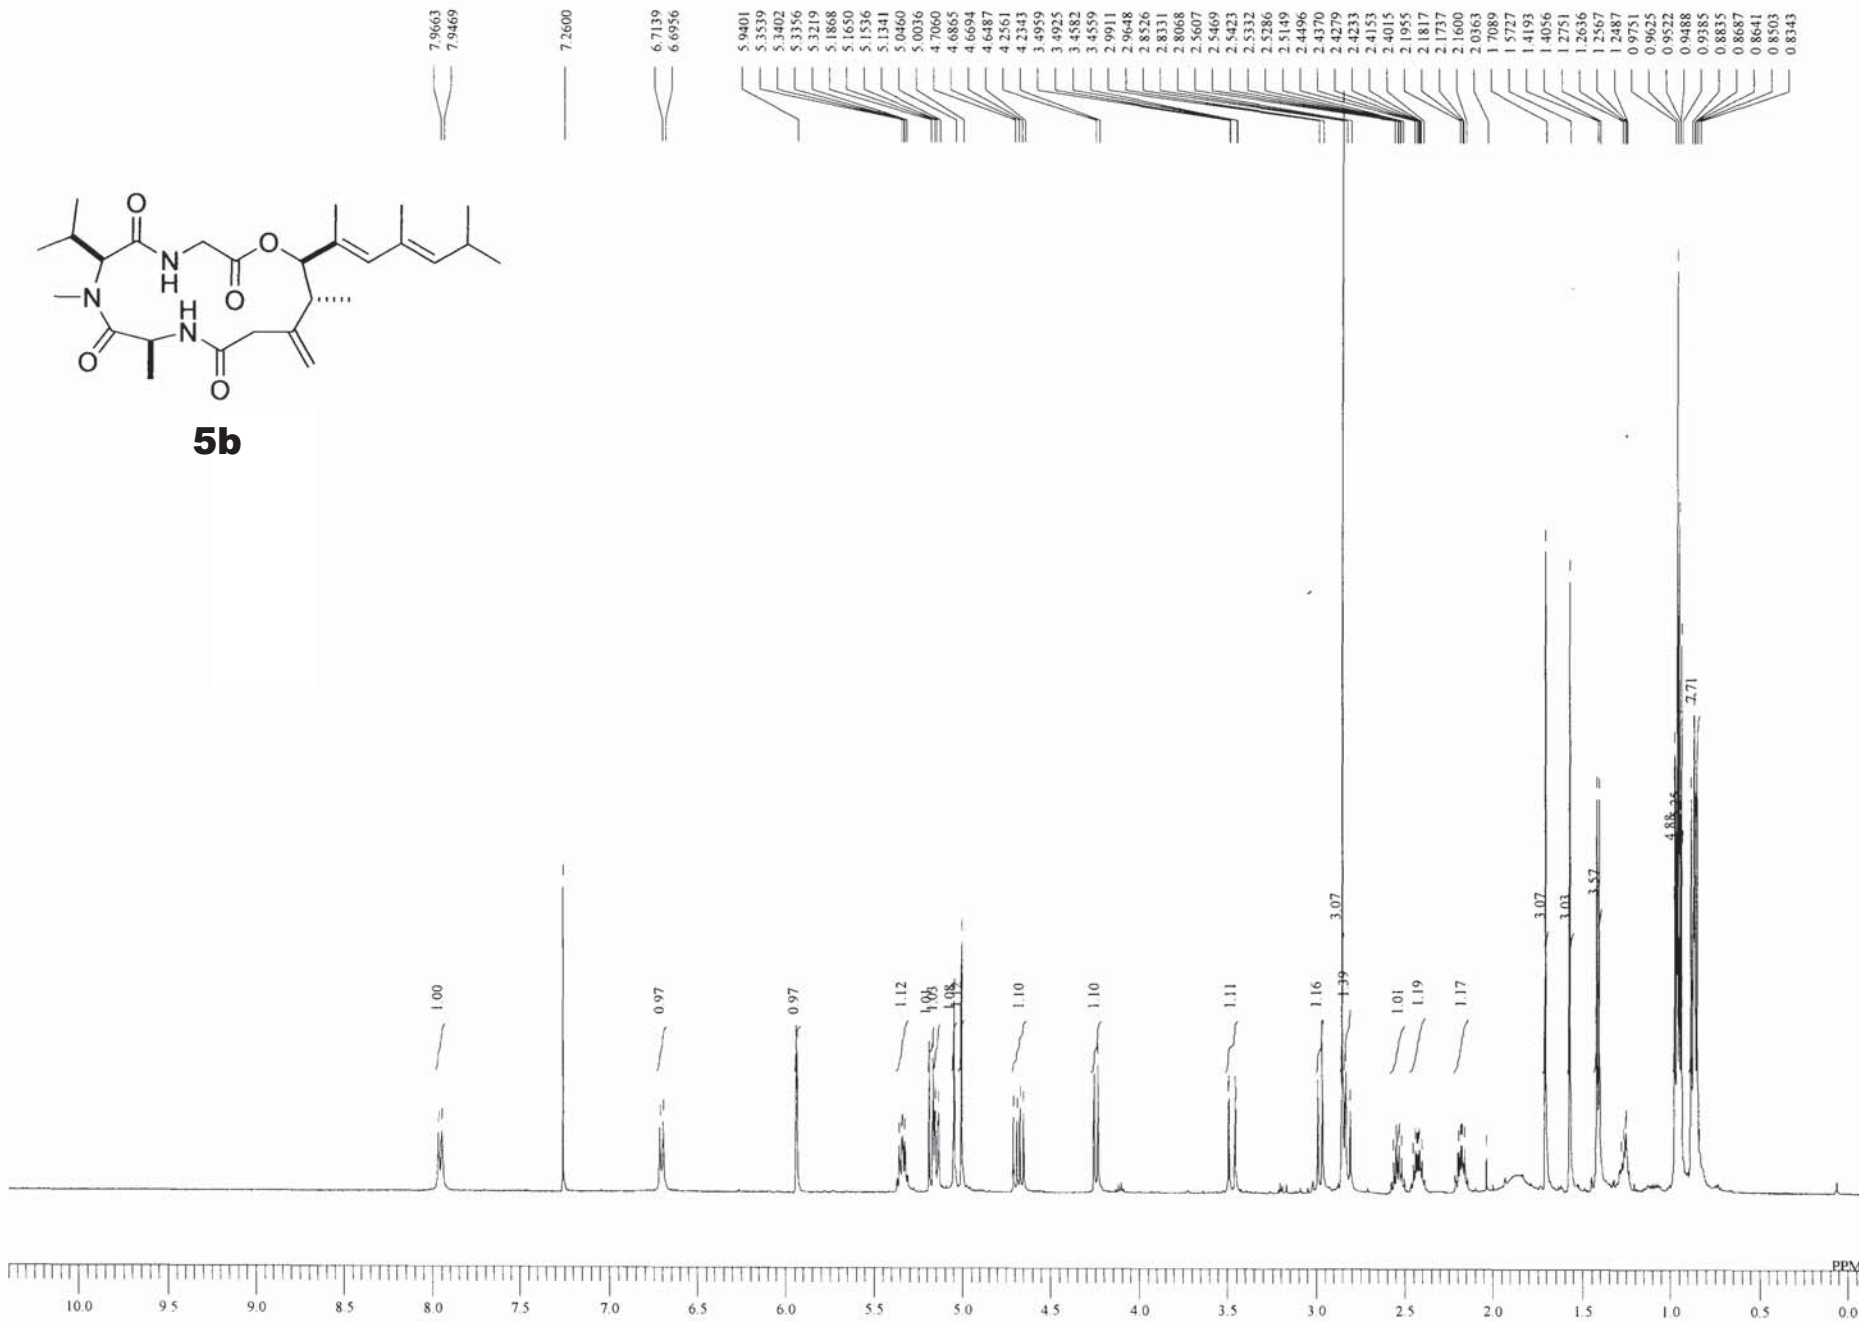

|       |                      |
|-------|----------------------|
| DATIM | 18-08-2010 21:55:18  |
| MENUF |                      |
| OBNUC | 1H                   |
| OFR   | 495.13 MHz           |
| OBSET | 4.38 KHz             |
| OBFIN | 9.64 Hz              |
| PW1   | 6.00 usec            |
| DEADT | 0.00 usec            |
| PREDL | 0.00000 msec         |
| IWT   | 1.0000 sec           |
| POINT | 13107                |
| SPO   | 13107                |
| TIMES | 8                    |
| DUMMY | 1                    |
| FREQU | 7429.31 Hz           |
| FLT   | 38000 Hz             |
| DELAY | 13.16 usec           |
| ACQTM | 1.7642 sec           |
| PD    | 1.5000 sec           |
| ADBIT | 16                   |
| RGAIN | 46                   |
| BF    | 0.01 Hz              |
| T1    | 0.00                 |
| T2    | 0.00                 |
| T3    | 90.00                |
| T4    | 100.00               |
| EXMOD | single_pulse ex2     |
| EXPCM |                      |
| IRNUC | 1H                   |
| IFR   | 495.13 MHz           |
| IRSET | 4.38 KHz             |
| IRFIN | 9.64 Hz              |
| IRRPW | 92 usec              |
| IRATN | 79                   |
| DFILE | KO-ATX-Me-iPr-1H.als |
| SF    |                      |
| LKSET | 748.40 KHz           |
| LKFIN | 98.2 Hz              |
| LKLEV | 0                    |
| LGAIN | 0                    |
| LKPHS | 0                    |
| LKSIG | 0                    |
| CSPED | 0 Hz                 |
| FILDC |                      |
| FILDF |                      |

C:\Documents and Settings\PC-USER\My Documents\Data\okura\ATX\ECX and ECA\als\KO-ATX-Me-iPr-13C.als

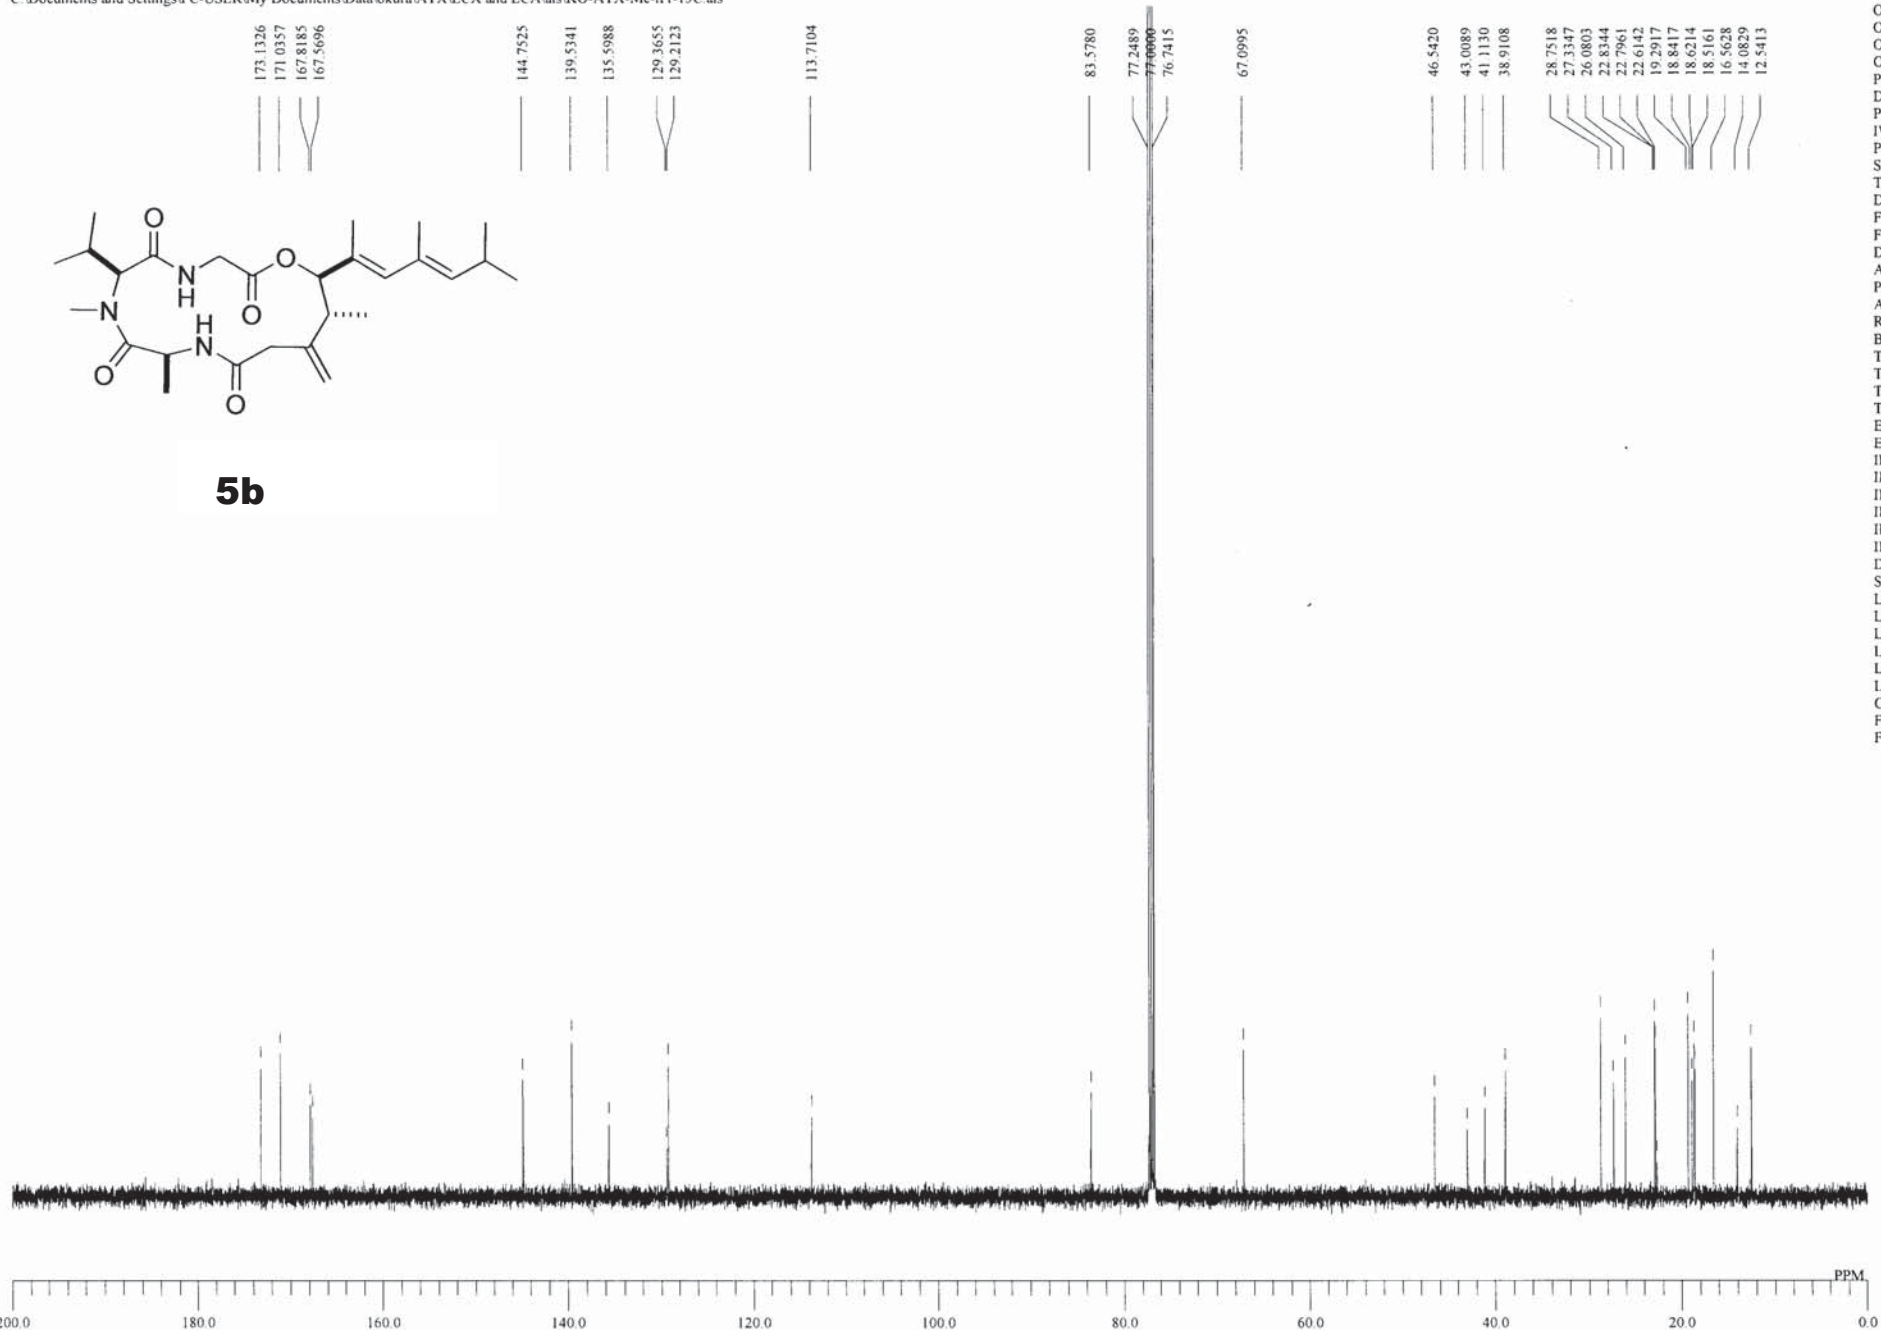

|       |                       |
|-------|-----------------------|
| DATIM | 18-08-2010 23:28:37   |
| MENUP |                       |
| OBNUC | 13C                   |
| OFR   | 124.51 MHz            |
| OBSET | 3.45 KHz              |
| OBFIN | 6.00 Hz               |
| PW1   | 3.25 usec             |
| DEADT | 0.00 usec             |
| PREDL | 0.00000 msec          |
| IWT   | 1.0000 sec            |
| POINT | 26214                 |
| SPO   | 26214                 |
| TIMES | 512                   |
| DUMMY | 4                     |
| FREQU | 31249.52 Hz           |
| FLT   | 157000 Hz             |
| DELAY | 20.80 usec            |
| ACQTM | 0.8389 sec            |
| PD    | 10.0000 sec           |
| ADBIT | 16                    |
| RGAIN | 60                    |
| BF    | 0.10 Hz               |
| T1    | 0.00                  |
| T2    | 0.00                  |
| T3    | 90.00                 |
| T4    | 100.00                |
| EXMOD | single_pulse_dec      |
| EXPCM |                       |
| IRNUC | 1H                    |
| IFR   | 495.13 MHz            |
| IRSET | 4.38 KHz              |
| IRFIN | 9.64 Hz               |
| IRRPW | 92 usec               |
| IRATN | 79                    |
| DFILE | KO-ATX-Me-iPr-13C.als |
| SF    |                       |
| LKSET | 748.40 KHz            |
| LKFIN | 98.2 Hz               |
| LKLEV | 0                     |
| LGAIN | 0                     |
| LKPHS | 0                     |
| LKSIG | 0                     |
| CSPED | 0 Hz                  |
| FILDC |                       |
| FILDF |                       |

C:\Documents and Settings\PC-USER\My Documents\Data\okura\ATX\ECX and ECA\als\KO-ATX-Me-cHex-1H.als

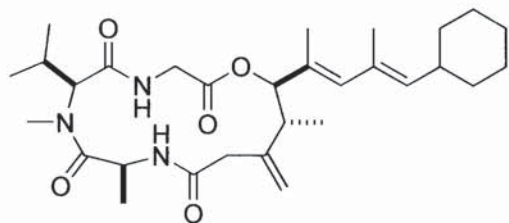

**5c**

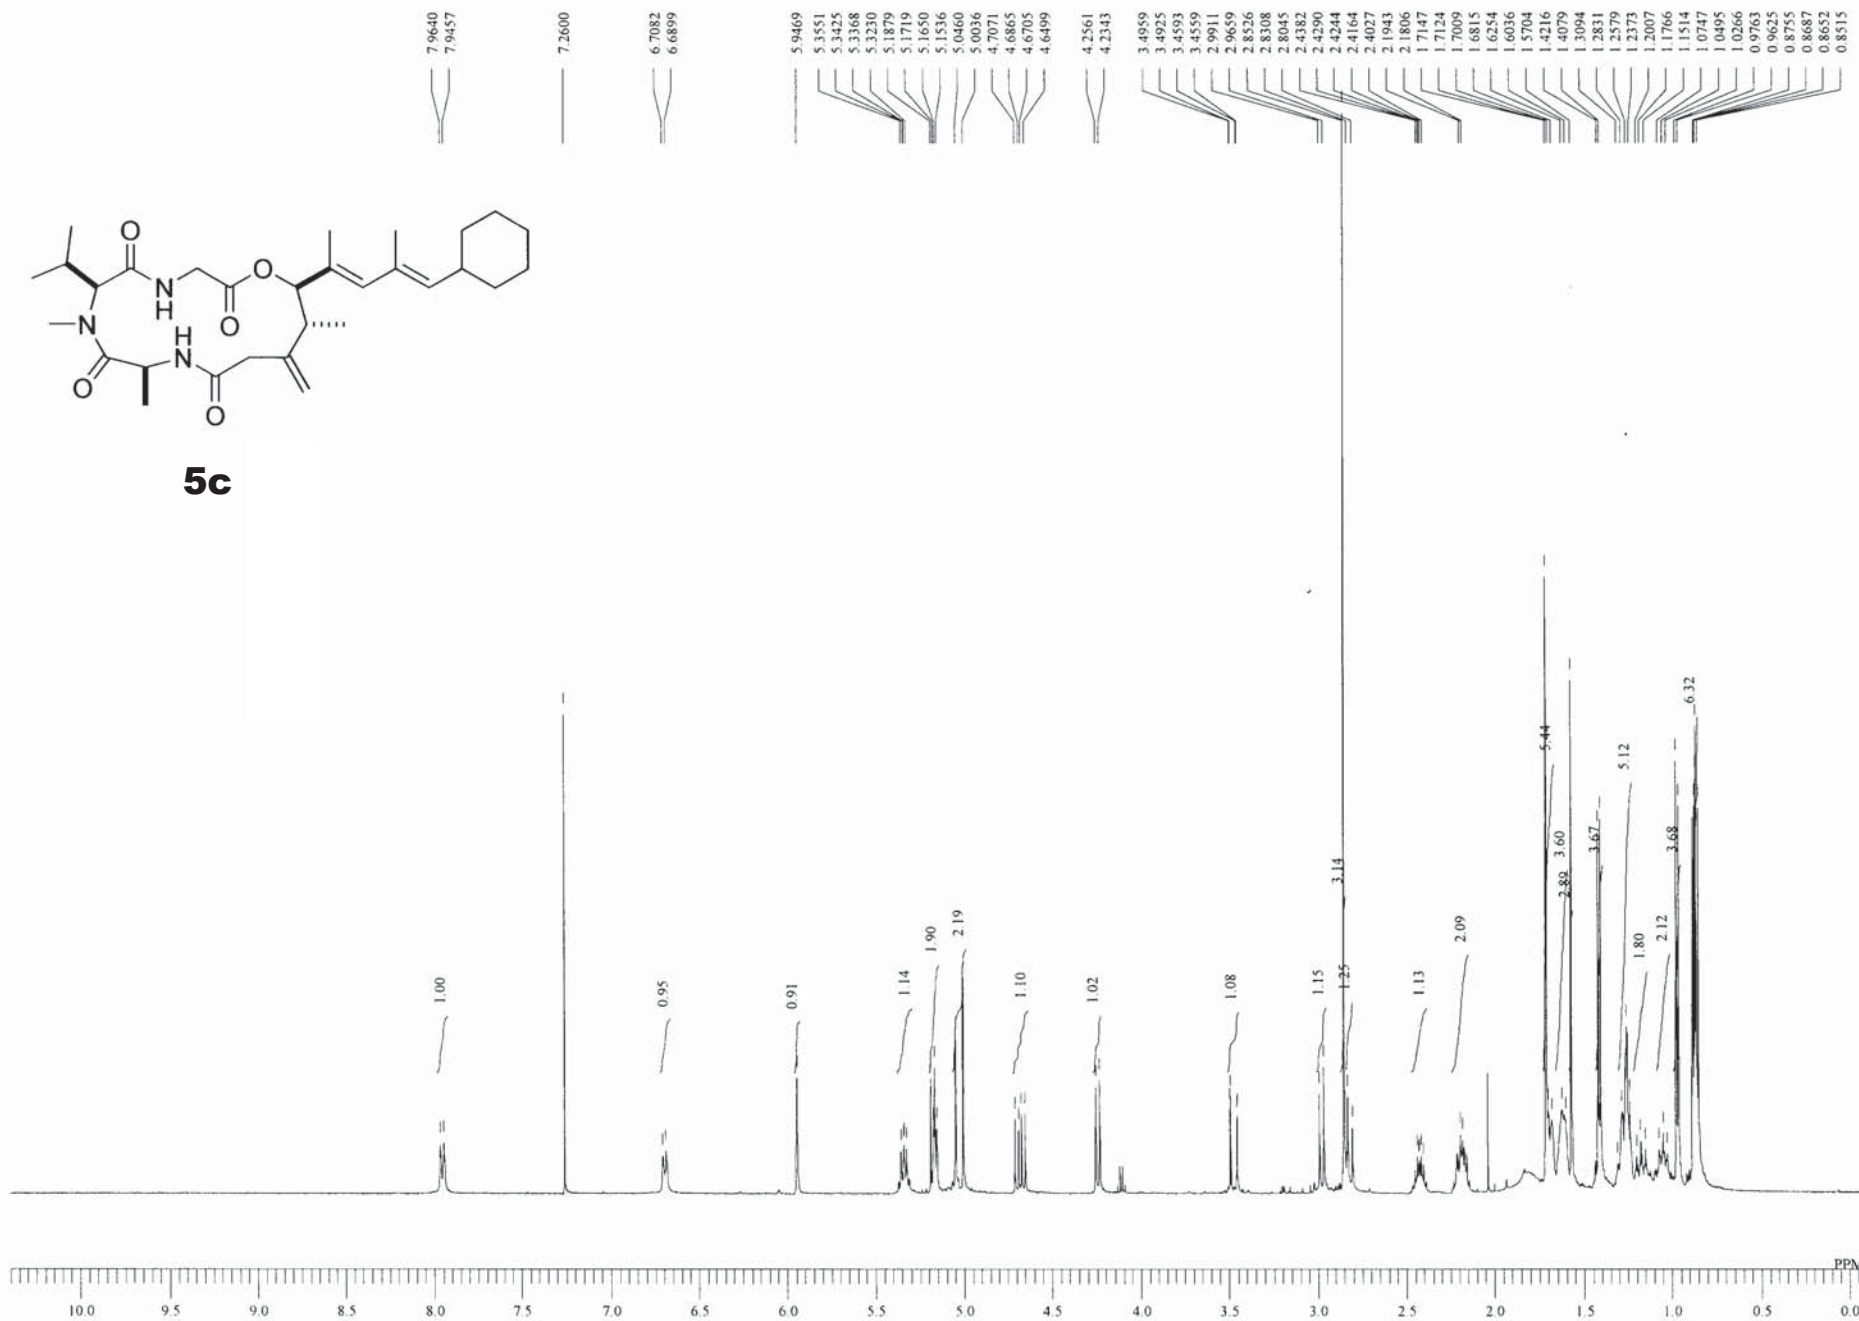

|       |                       |
|-------|-----------------------|
| DATIM | 19-08-2010 18:36:02   |
| MENUF | 1H                    |
| OBNUC | 1H                    |
| OFR   | 495.13 MHz            |
| OBSET | 4.38 KHz              |
| OBFIN | 9.64 Hz               |
| PW1   | 6.00 usec             |
| DEADT | 0.00 usec             |
| PREDL | 0.00000 msec          |
| IWT   | 1.0000 sec            |
| POINT | 13107                 |
| SPO   | 13107                 |
| TIMES | 8                     |
| DUMMY | 1                     |
| FREQU | 7429.31 Hz            |
| FLT   | 38000 Hz              |
| DELAY | 13.16 usec            |
| ACQTM | 1.7642 sec            |
| PD    | 1.5000 sec            |
| ADBIT | 16                    |
| RGAIN | 46                    |
| BF    | 0.01 Hz               |
| T1    | 0.00                  |
| T2    | 0.00                  |
| T3    | 90.00                 |
| T4    | 100.00                |
| EXMOD | single_pulse.ex2      |
| EXPCM |                       |
| IRNUC | 1H                    |
| IRSET | 495.13 MHz            |
| IRFIN | 4.38 KHz              |
| IRFPW | 9.64 Hz               |
| IRRPW | 118 usec              |
| IRATN | 79                    |
| DFILE | KO-ATX-Me-cHex-1H.als |
| SF    |                       |
| LKSET | 748.40 KHz            |
| LKFIN | 98.2 Hz               |
| LKLEV | 0                     |
| LGAIN | 0                     |
| LKPHS | 0                     |
| LKSIG | 0                     |
| CSPED | 0 Hz                  |
| FILDC |                       |
| FILDF |                       |

C:\Documents and Settings\PC-USER\My Documents\Data\okura\ATX\ECX and ECA\als\KO-ATX-Me-cHex-13C.als

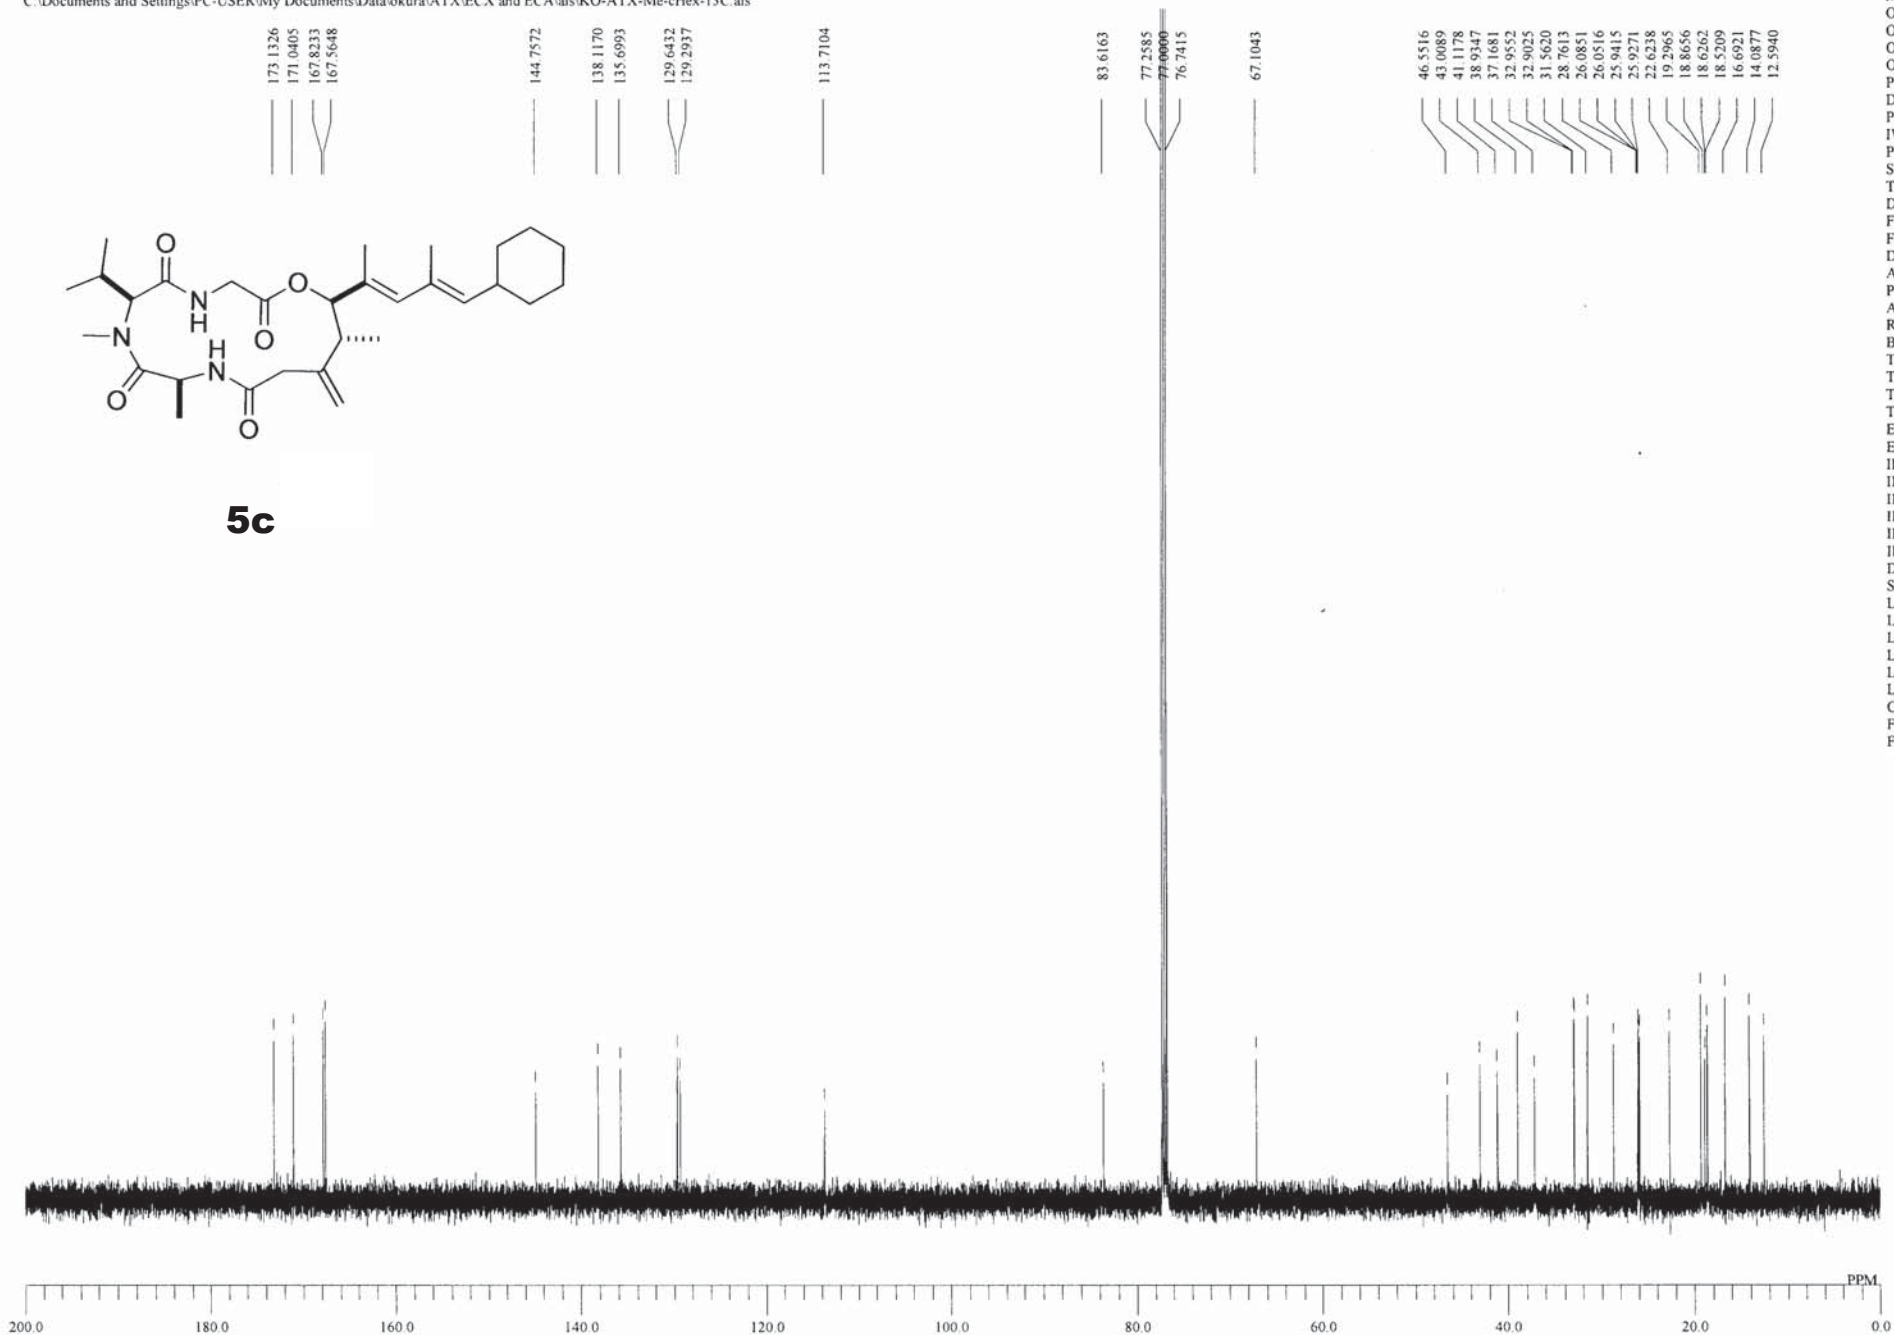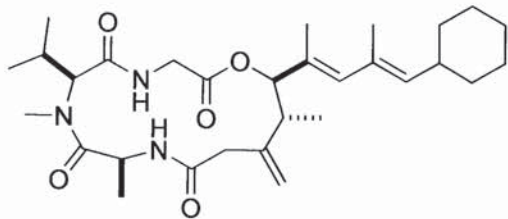

**5c**

|       |                      |
|-------|----------------------|
| DATIM | 19-08-2010 20:09:21  |
| MENUF |                      |
| OBNUC | 13C                  |
| OFR   | 124.51 MHz           |
| OBSET | 3.45 KHz             |
| OBFIN | 6.00 Hz              |
| PWI   | 3.25 usec            |
| DEADT | 0.00 usec            |
| PREDL | 0.00000 msec         |
| IWT   | 1.0000 sec           |
| POINT | 52428                |
| SPO   | 52428                |
| TIMES | 512                  |
| DUMMY | 4                    |
| FREQU | 31249.52 Hz          |
| FLT   | 157000 Hz            |
| DELAY | 20.80 usec           |
| ACQTM | 0.8389 sec           |
| PD    | 10.0000 sec          |
| ADBIT | 16                   |
| RGAIN | 60                   |
| BF    | 0.01 Hz              |
| T1    | 0.00                 |
| T2    | 0.00                 |
| T3    | 90.00                |
| T4    | 100.00               |
| EXMOD | single_pulse_dec     |
| EXPCM |                      |
| IRNUC | 1H                   |
| IFR   | 495.13 MHz           |
| IRSET | 4.38 KHz             |
| IRFIN | 9.64 Hz              |
| IRRPW | 92 usec              |
| IRATN | 79                   |
| DFILE | KO-ATX-Me-cHex-13C.a |
| SF    |                      |
| LKSET | 748.40 KHz           |
| LKFIN | 98.2 Hz              |
| LKLEV | 0                    |
| LGAIN | 0                    |
| LKPHS | 0                    |
| LKSIG | 0                    |
| CSPED | 0 Hz                 |
| FILDC |                      |
| FILDF |                      |

C:\Documents and Settings\PC-USER\My Documents\Data\okura\ATX\ECX and ECA\als\KO-ATX-Me-Ad-1H.als

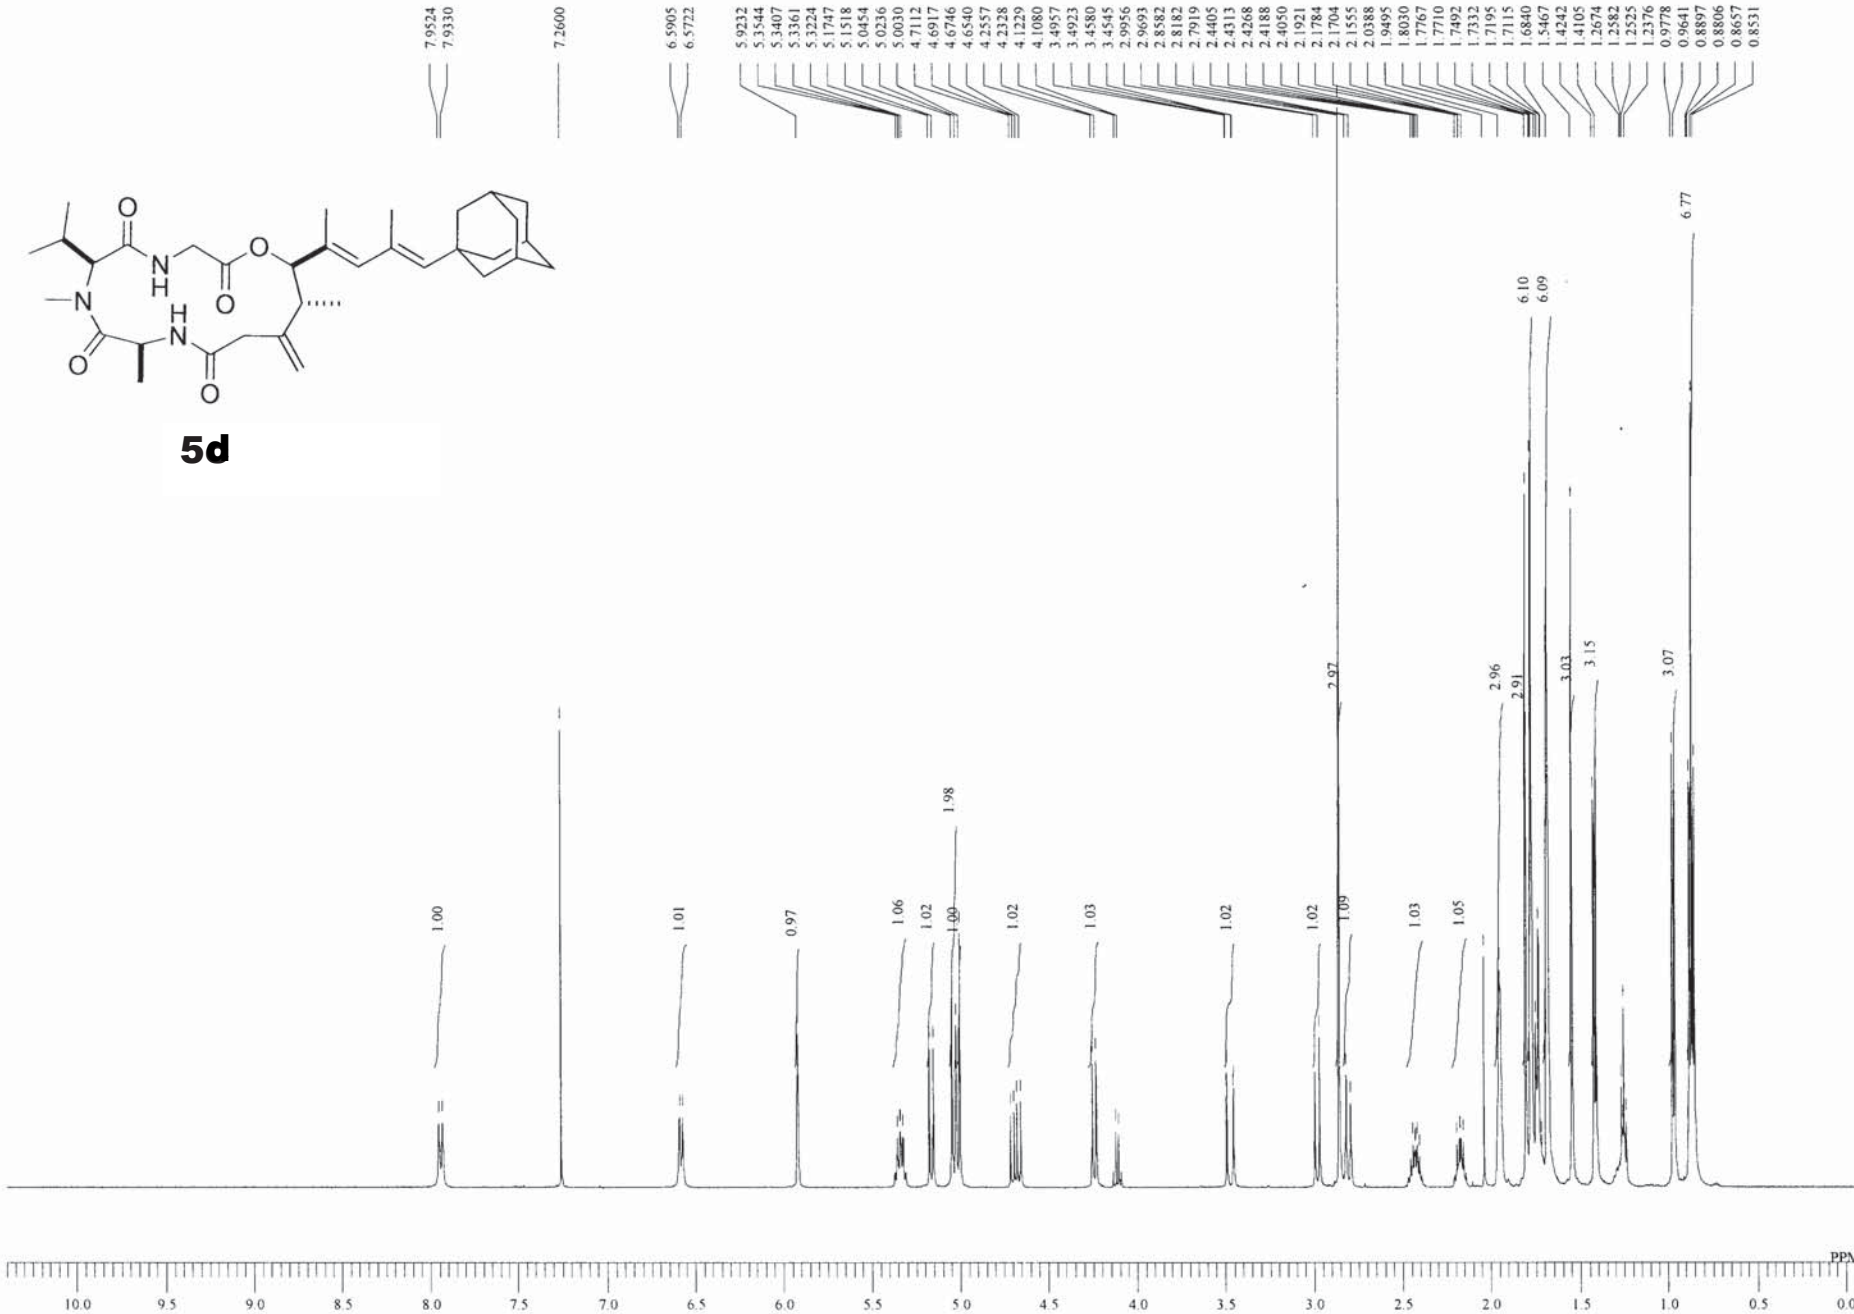

DATIM 23-08-2010 16:54:41  
 MENUF 1H  
 OBNUC 1H  
 OFR 490.15 MHz  
 OBSET 9.16 KHz  
 OFBIN 7.60 Hz  
 PW1 8.55 usec  
 DEADT 0.00 usec  
 PREDL 0.00000 msec  
 IWT 1.0000 sec  
 POINT 13107  
 SPO 13107  
 TIMES 8  
 DUMMY 1  
 FREQU 7352.83 Hz  
 FLT 37000 Hz  
 DELAY 13.52 usec  
 ACQTM 1.7826 sec  
 PD 1.5000 sec  
 ADBIT 16  
 RGAIN 40  
 BF 0.01 Hz  
 T1 0.00  
 T2 0.00  
 T3 90.00  
 T4 100.00  
 EXMOD single\_pulse.ex2  
 EXPCM 1H  
 IRNUC 1H  
 IFR 490.15 MHz  
 IRSET 9.16 KHz  
 IRFIN 7.60 Hz  
 IRRPW 118 usec  
 IRATN 79  
 DFILE KO-ATX-Me-Ad-1H.als  
 SF 70.30 KHz  
 LKSET 32.5 Hz  
 LKFIN 0  
 LKLEV 0  
 LGAIN 0  
 LKPHS 0  
 LKSIG 0  
 CSPED 0 Hz  
 FILDC  
 FILDF



C:\Documents and Settings\PC-USER\My Documents\Data\okura\ATX\ECX and ECA\als\KO-ATX-Me-Ad-13C.als

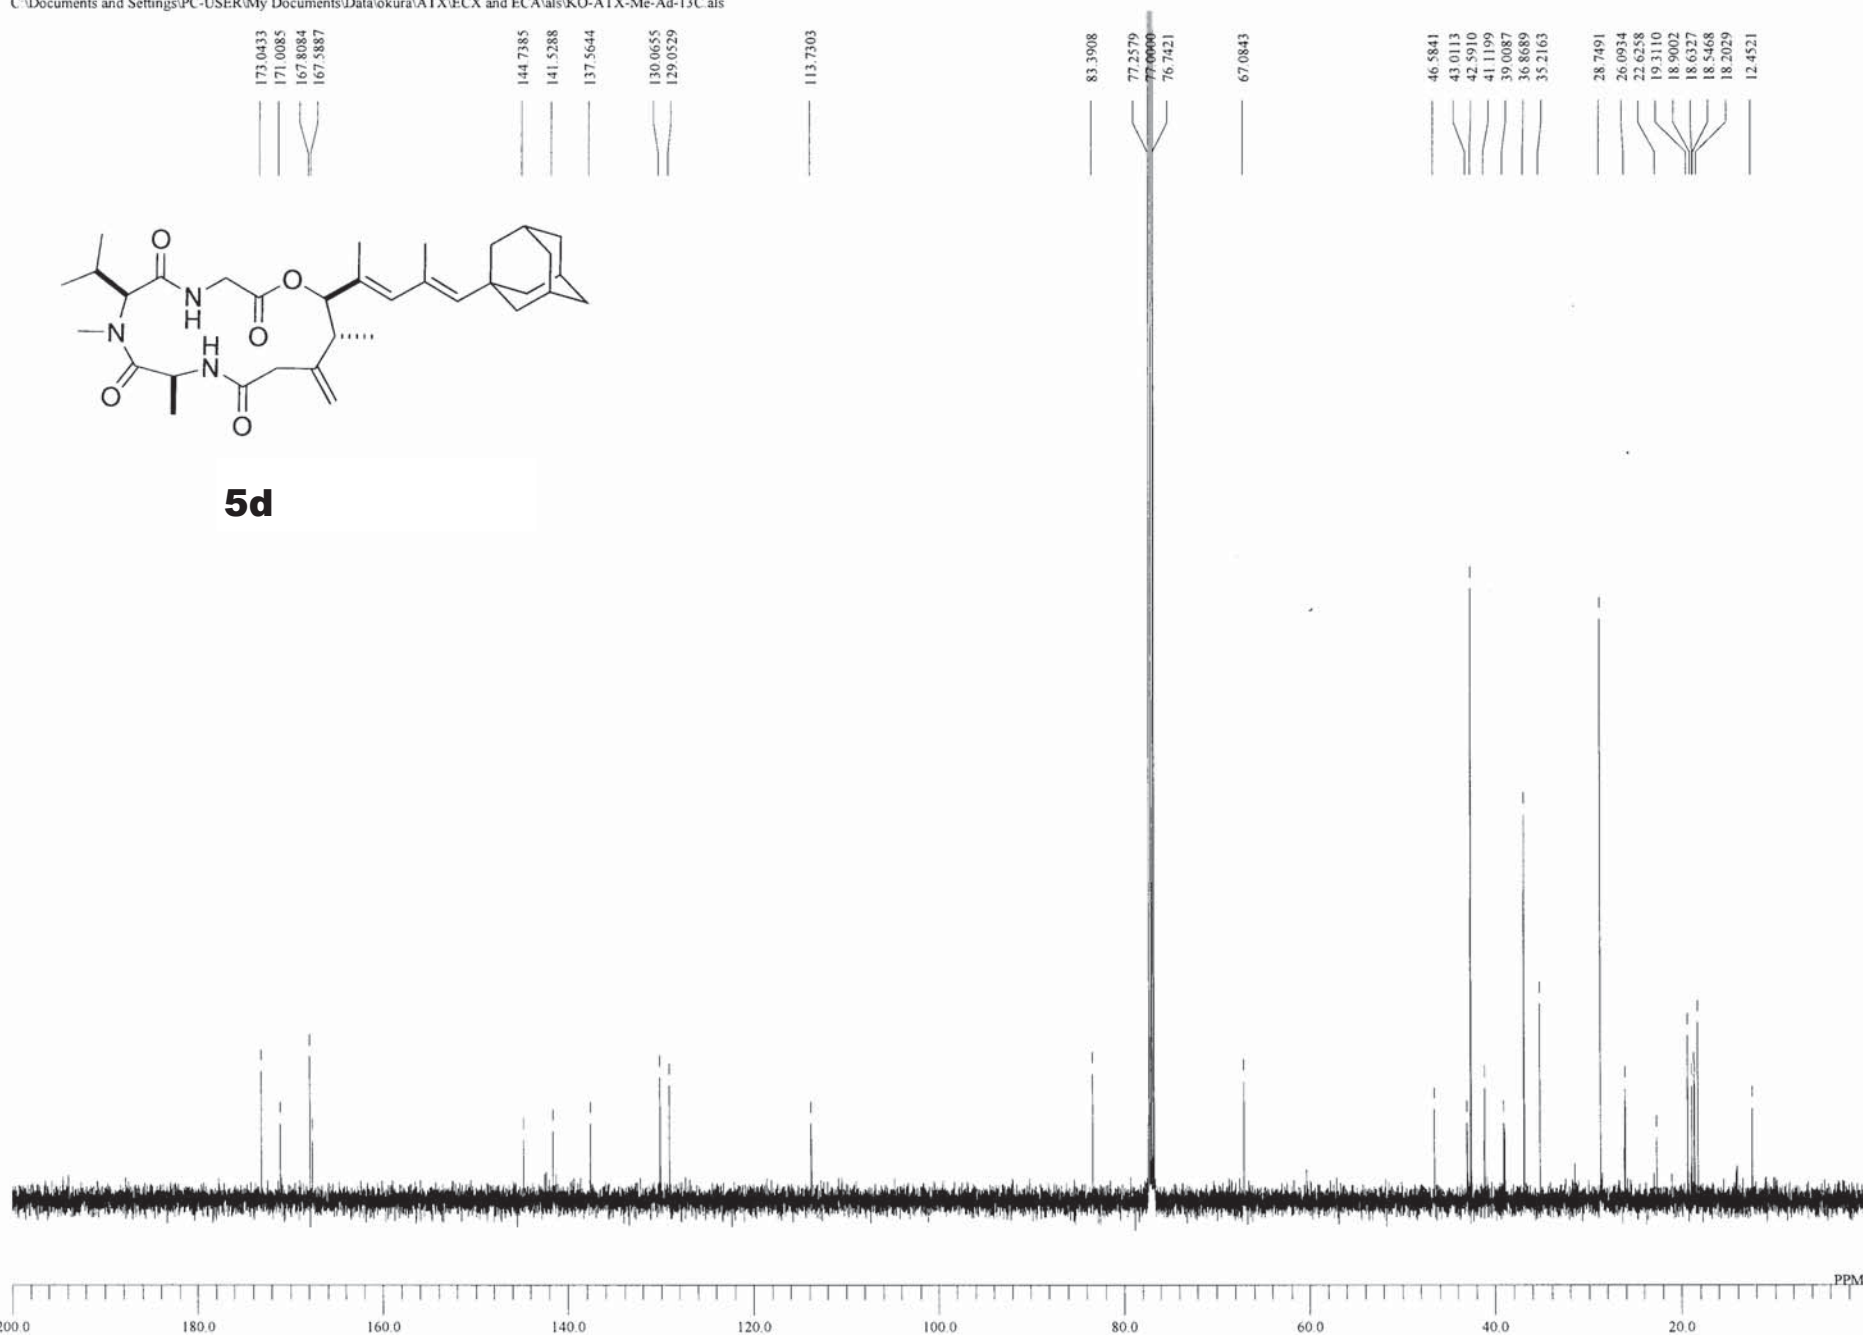

|       |                      |
|-------|----------------------|
| DATIM | 23-08-2010 18:28:52  |
| MENUP |                      |
| OBNUC | 13C                  |
| OFR   | 123.26 MHz           |
| OBSET | 2.31 KHz             |
| OBFIN | 6.71 Hz              |
| PW1   | 3.20 usec            |
| DEADT | 0.00 usec            |
| PREDL | 0.00000 msec         |
| IWT   | 1.0000 sec           |
| POINT | 26214                |
| SPO   | 26214                |
| TIMES | 512                  |
| DUMMY | 4                    |
| FREQU | 30863.73 Hz          |
| FLT   | 155000 Hz            |
| DELAY | 21.06 usec           |
| ACQTM | 0.8493 sec           |
| PD    | 10.0000 sec          |
| ADBIT | 16                   |
| RGAIN | 60                   |
| BF    | 0.10 Hz              |
| T1    | 0.00                 |
| T2    | 0.00                 |
| T3    | 90.00                |
| T4    | 100.00               |
| EXMOD | single_pulse_dec     |
| EXPCM |                      |
| IRNUC | 1H                   |
| IFR   | 490.15 MHz           |
| IRSET | 9.16 KHz             |
| IRFIN | 7.60 Hz              |
| IRRPW | 92 usec              |
| IRATN | 79                   |
| DFILE | KO-ATX-Me-Ad-13C.als |
| SF    |                      |
| LKSET | 70.30 KHz            |
| LKFIN | 32.5 Hz              |
| LKLEV | 0                    |
| LGAIN | 0                    |
| LKPHS | 0                    |
| LKSIG | 0                    |
| CSPED | 0 Hz                 |
| FILDC |                      |
| FILDF |                      |

C:\Documents and Settings\PC-USER\My Documents\Data\okura\ATX\ECX and ECA\als\KO-ATX-Me-TIPS-1H.als

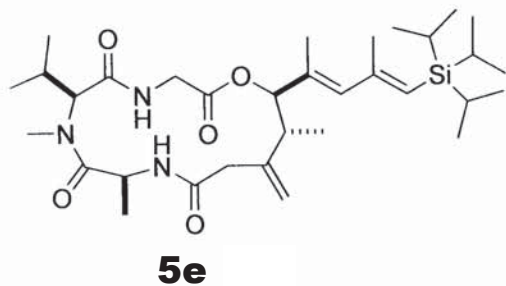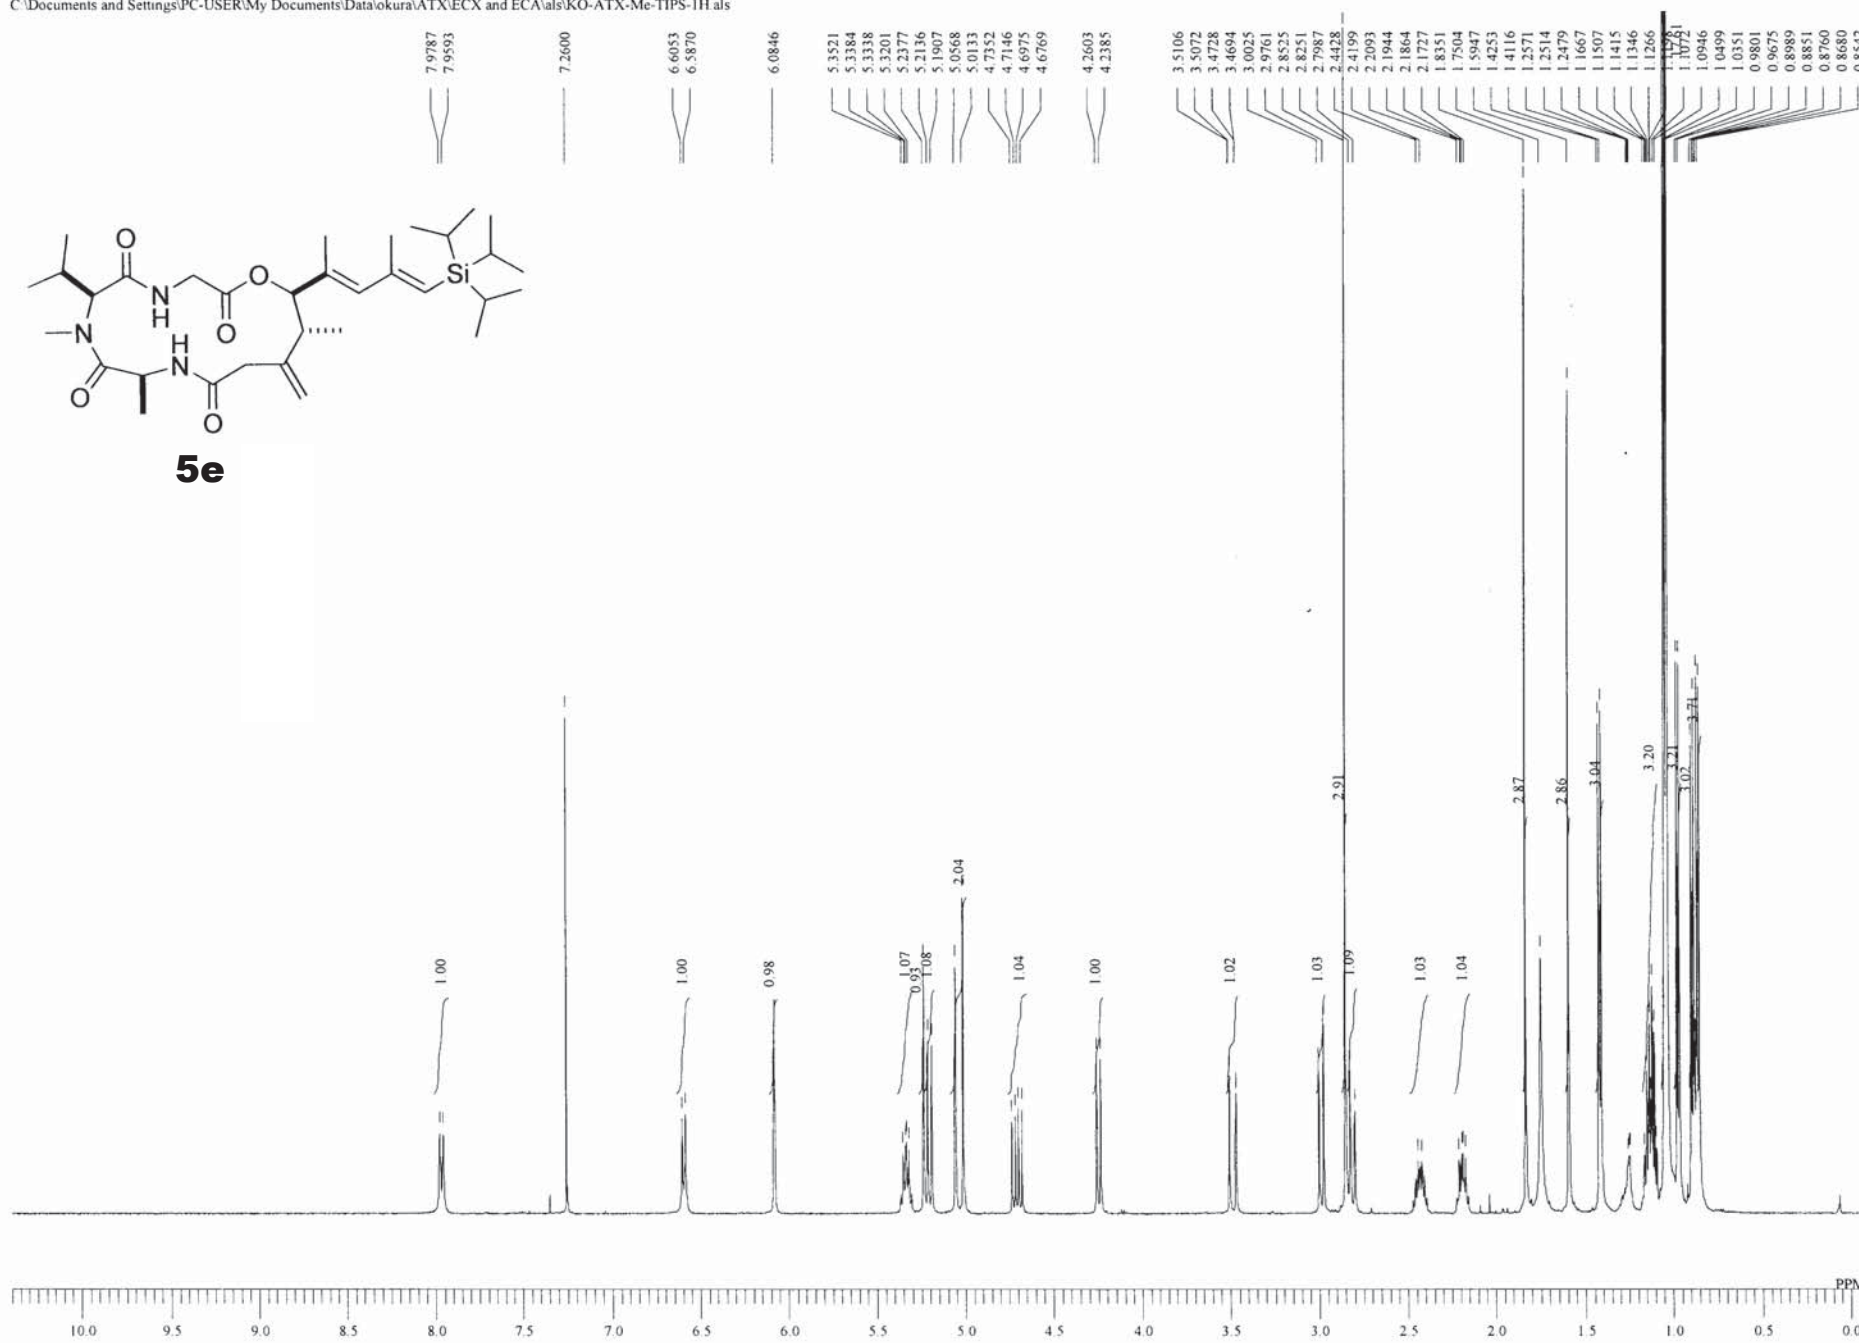

|       |                       |
|-------|-----------------------|
| DATIM | 23-08-2010 19:21:11   |
| MENUF |                       |
| OBNUC | <sup>1</sup> H        |
| OFR   | 490.15 MHz            |
| OBSET | 9.16 KHz              |
| OBFIN | 7.60 Hz               |
| PW1   | 8.55 usec             |
| DEADT | 0.00 usec             |
| PREDL | 0.00000 msec          |
| IWT   | 1.0000 sec            |
| POINT | 13107                 |
| SPO   | 13107                 |
| TIMES | 8                     |
| DUMMY | 1                     |
| FREQU | 7352.83 Hz            |
| FLT   | 37000 Hz              |
| DELAY | 13.52 usec            |
| ACQTM | 1.7826 sec            |
| PD    | 1.5000 sec            |
| ADBIT | 16                    |
| RGAIN | 38                    |
| BF    | 0.01 Hz               |
| T1    | 0.00                  |
| T2    | 0.00                  |
| T3    | 90.00                 |
| T4    | 100.00                |
| EXMOD | single_pulse.ex2      |
| EXPCM |                       |
| IRNUC | <sup>1</sup> H        |
| IFR   | 490.15 MHz            |
| IRSET | 9.16 KHz              |
| IRFIN | 7.60 Hz               |
| IRRPW | 118 usec              |
| IRATN | 79                    |
| DFILE | KO-ATX-Me-TIPS-1H.als |
| SF    |                       |
| LKSET | 70.30 KHz             |
| LKFIN | 32.5 Hz               |
| LKLEV | 0                     |
| LGAIN | 0                     |
| LKPHS | 0                     |
| LKSIG | 0                     |
| CSPED | 0 Hz                  |
| FILDC |                       |
| FILDF |                       |

C:\Documents and Settings\PC-USER\My Documents\Data\okura\ATX\ECX and ECA\als\KO-ATX-Me-TIPS-13C.als

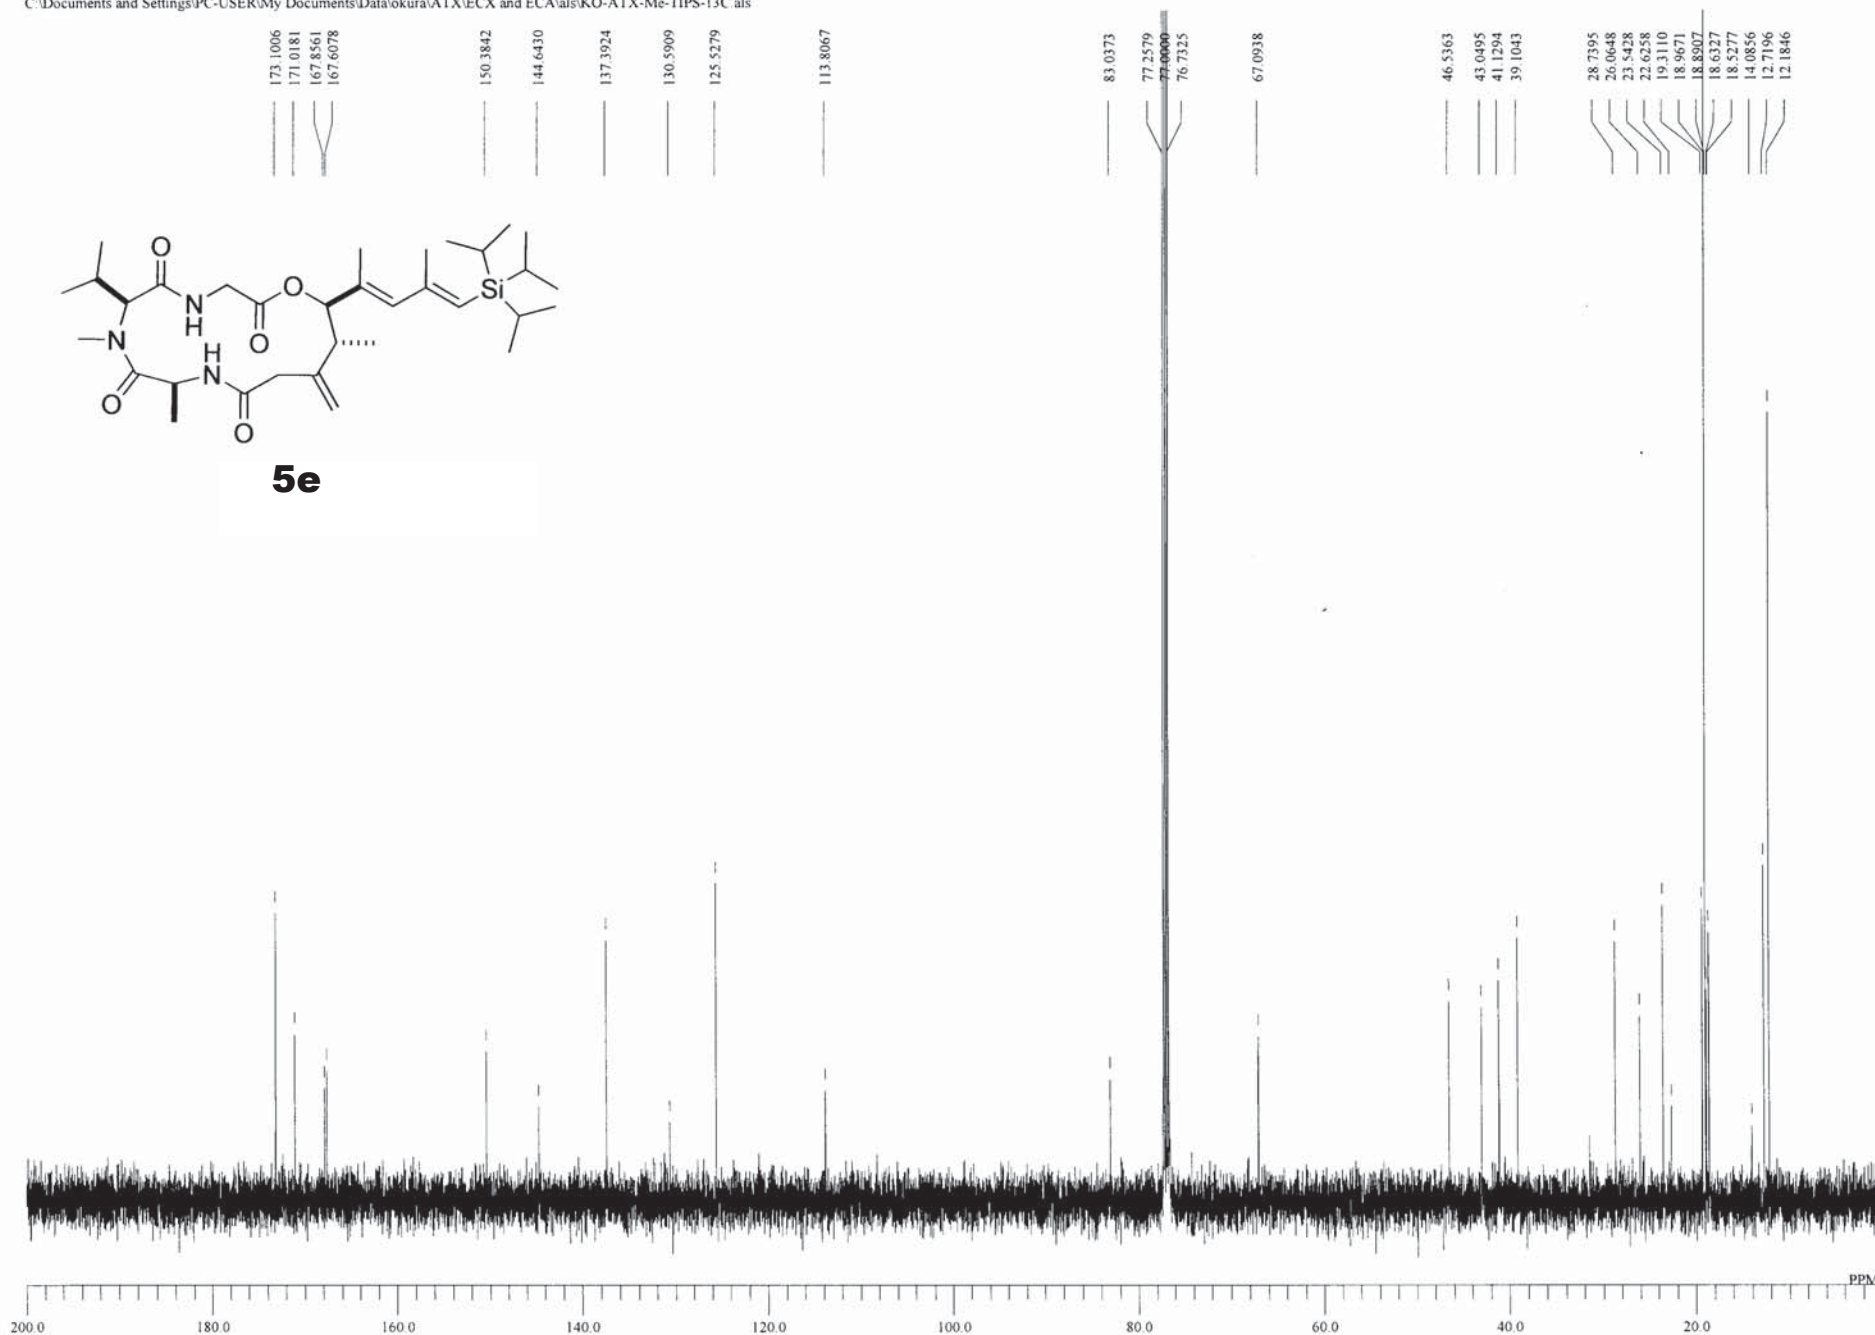

DATIM 23-08-2010 20:55:11  
 MENUF  
 OBNUC 13C  
 OFR 123.26 MHz  
 OBSSET 2.31 KHz  
 OBFIN 6.71 Hz  
 PW1 3.20 usec  
 DEADT 0.00 usec  
 PREDL 0.00000 msec  
 IWT 1.0000 sec  
 POINT 26214  
 SPO 26214  
 TIMES 512  
 DUMMY 4  
 FREQU 30863.73 Hz  
 FLT 155000 Hz  
 DELAY 21.06 usec  
 ACQTM 0.8493 sec  
 PD 10.0000 sec  
 ADBIT 16  
 RGAIN 60  
 BF 0.10 Hz  
 T1 0.00  
 T2 0.00  
 T3 90.00  
 T4 100.00  
 EXMOD single\_pulse\_dec  
 EXPCM  
 IRNUC 1H  
 IFR 490.15 MHz  
 IRSET 9.16 KHz  
 IRFIN 7.60 Hz  
 IRRPW 92 usec  
 IRATN 79  
 DFILE KO-ATX-Me-TIPS-13C.a  
 SF  
 LKSET 70.30 KHz  
 LKFIN 32.5 Hz  
 LKLEV 0  
 LGAIN 0  
 LKPHS 0  
 LKSIG 0  
 CSPED 0 Hz  
 FILDC  
 FILDF

C:\Documents and Settings\PC-USER\My Documents\Data\okura\ATX\ECX and ECA\als\KO-ATX-BPin-o-PhONB-1H.als

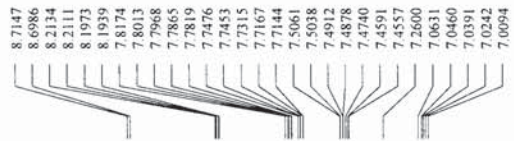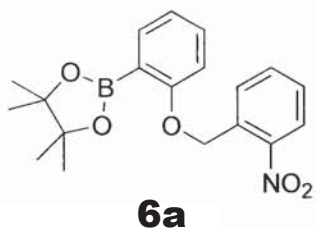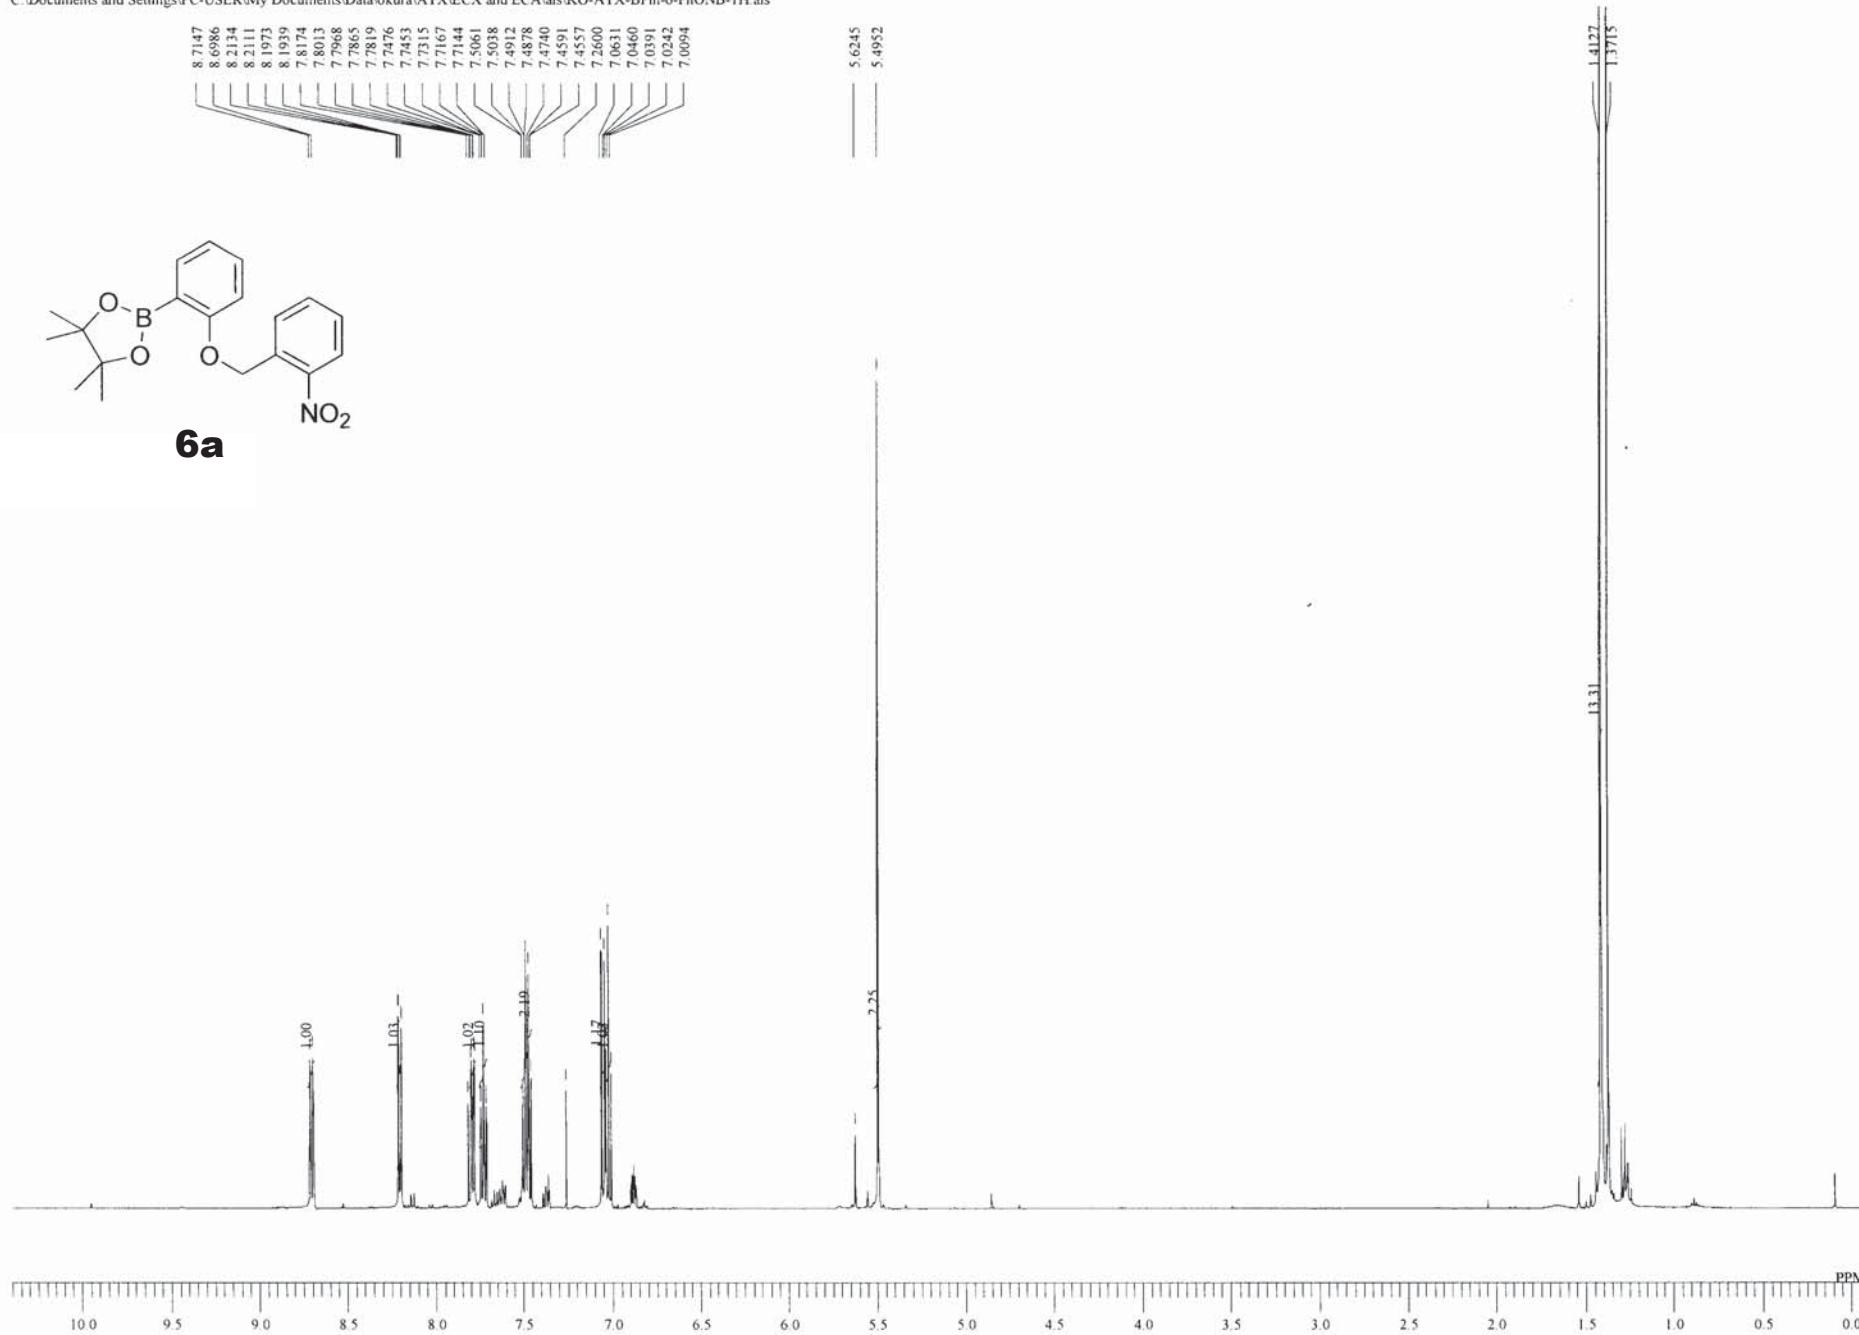

|       |                     |
|-------|---------------------|
| DATIM | 02-03-2011 21:25:44 |
| MENUF |                     |
| OBNUC | <sup>1</sup> H      |
| OFR   | 490.15 MHz          |
| OBSET | 9.16 KHz            |
| OBFIN | 7.60 Hz             |
| PW1   | 8.55 usec           |
| DEADT | 0.00 usec           |
| PREDL | 0.00000 msec        |
| IWT   | 1.0000 sec          |
| POINT | 13107               |
| SPO   | 13107               |
| TIMES | 8                   |
| DUMMY | 1                   |
| FREQU | 7352.83 Hz          |
| FLT   | 37000 Hz            |
| DELAY | 13.52 usec          |
| ACQTM | 1.7826 sec          |
| PD    | 1.5000 sec          |
| ADBIT | 16                  |
| RGAIN | 30                  |
| BF    | 0.01 Hz             |
| T1    | 0.00                |
| T2    | 0.00                |
| T3    | 90.00               |
| T4    | 100.00              |
| EXMOD | single_pulse ex2    |
| EXPCM |                     |
| IRNUC | <sup>1</sup> H      |
| IFR   | 490.15 MHz          |
| IRSET | 9.16 KHz            |
| IRFIN | 7.60 Hz             |
| IRRPW | 118 usec            |
| IRATN | 79                  |
| DFILE | KO-ATX-BPin-o-PhONB |
| SF    |                     |
| LKSET | 70.30 KHz           |
| LKFIN | 32.5 Hz             |
| LKLEV | 0                   |
| LGAIN | 0                   |
| LKPHS | 0                   |
| LKSIG | 0                   |
| CSPED | 0 Hz                |
| FILDC |                     |
| FILDF |                     |

C:\Documents and Settings\PC-USER\My Documents\Data\okura\ATX\ECX and ECA\als\KO-ATX-BPin-o-PhONB-13C.als

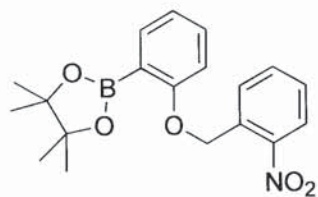

**6a**

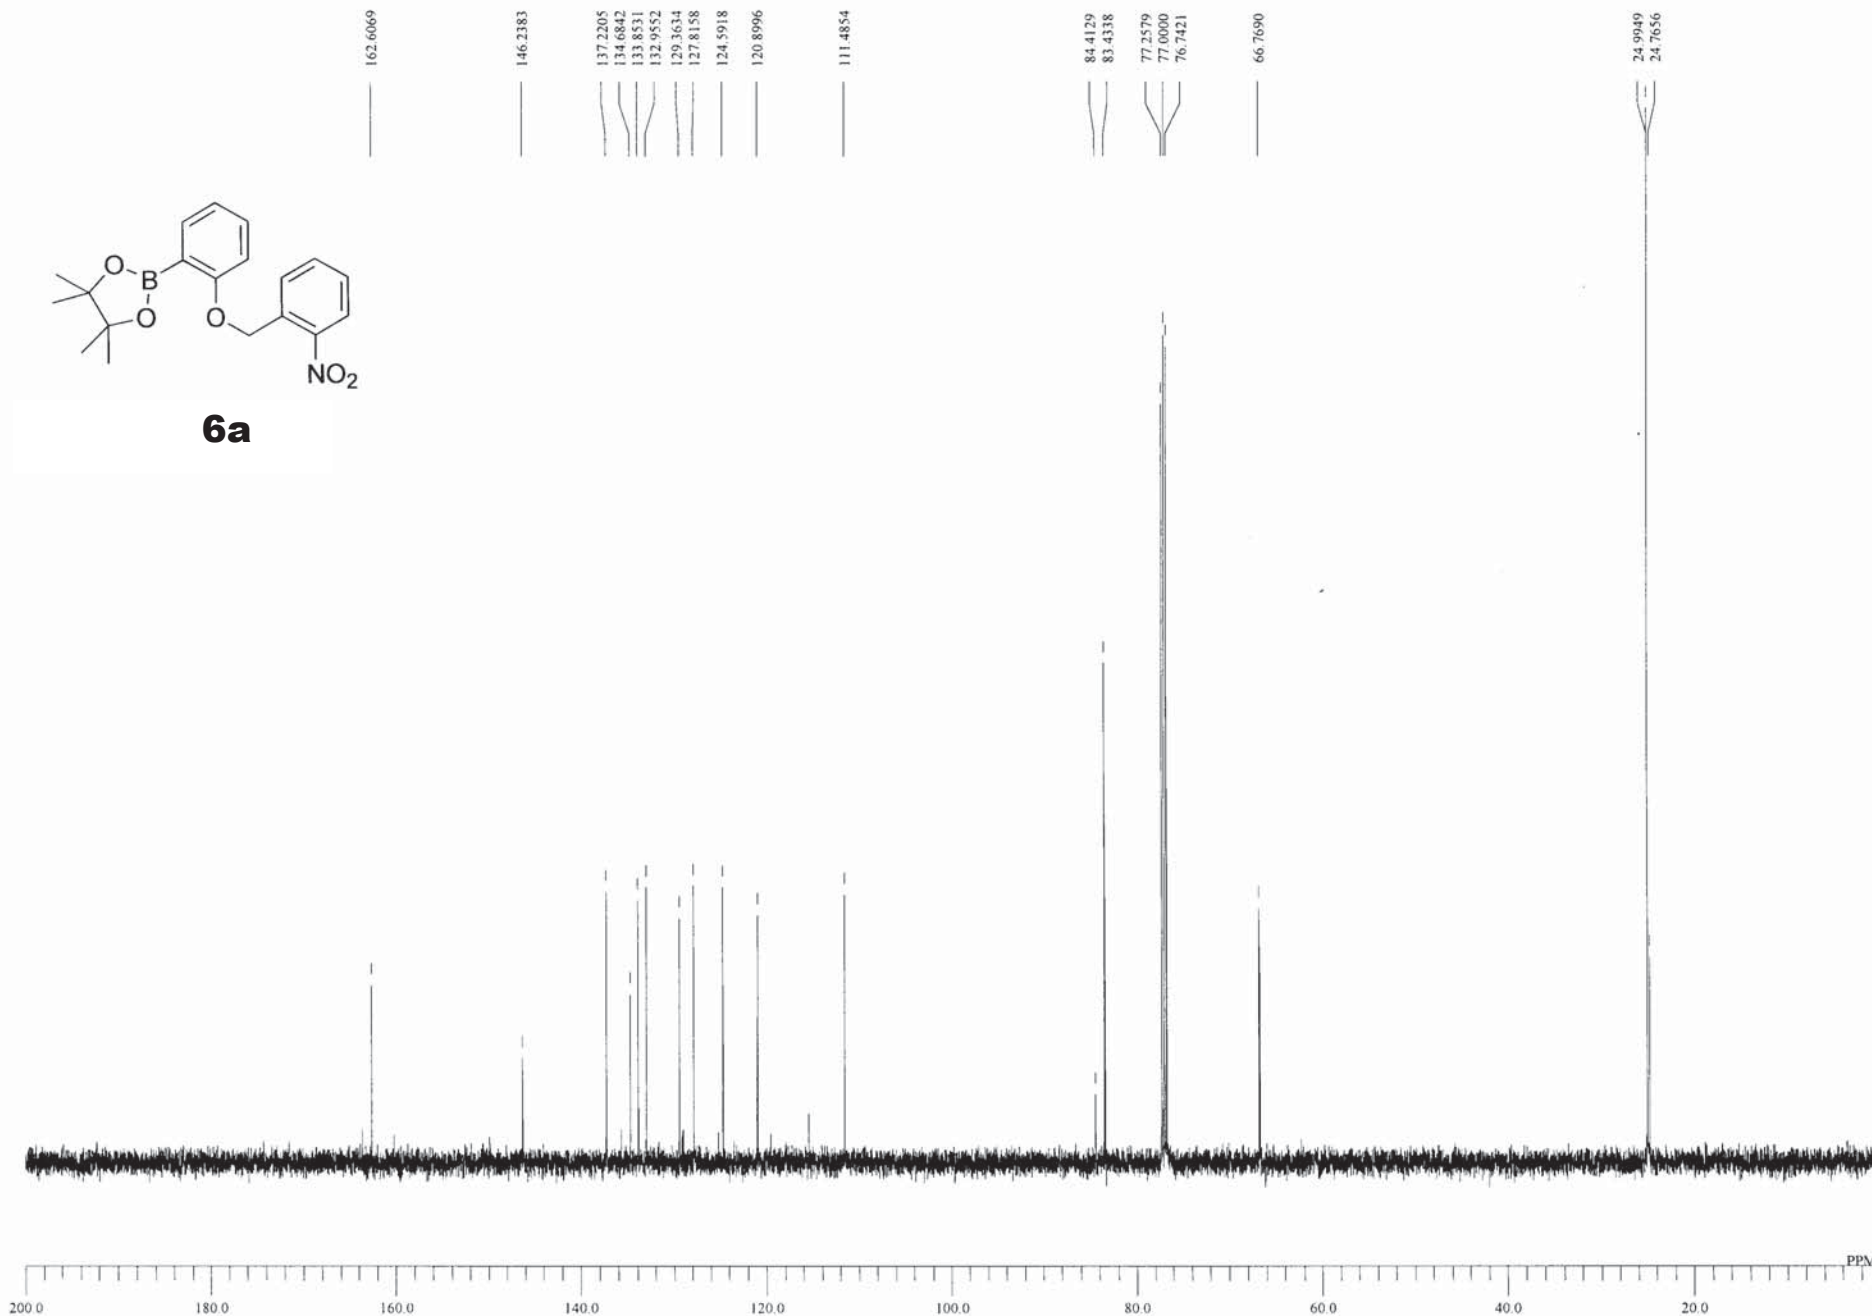

|       |                     |
|-------|---------------------|
| DATIM | 02-03-2011 18:32:03 |
| MENUP |                     |
| OBNUC | 13C                 |
| OFR   | 123.26 MHz          |
| OBSET | 2.31 KHz            |
| OBFIN | 6.71 Hz             |
| PW1   | 3.20 usec           |
| DEADT | 0.00 usec           |
| PREDL | 0.00000 msec        |
| IWT   | 1.0000 sec          |
| POINT | 52428               |
| SPO   | 52428               |
| TIMES | 16                  |
| DUMMY | 4                   |
| FREQU | 30863.73 Hz         |
| FLT   | 155000 Hz           |
| DELAY | 21.06 usec          |
| ACQTM | 0.8493 sec          |
| PD    | 10.0000 sec         |
| ADBIT | 16                  |
| RGAIN | 60                  |
| BF    | 1.00 Hz             |
| T1    | 0.00                |
| T2    | 0.00                |
| T3    | 90.00               |
| T4    | 100.00              |
| EXMOD | single_pulse_dec    |
| EXPCM |                     |
| IRNUC | 1H                  |
| IFR   | 490.15 MHz          |
| IRSET | 9.16 KHz            |
| IRFIN | 7.60 Hz             |
| IRRPW | 92 usec             |
| IRATN | 79                  |
| DFILE | KO-ATX-BPin-o-PhONB |
| SF    |                     |
| LKSET | 70.30 KHz           |
| LKFIN | 32.5 Hz             |
| LKLEV | 0                   |
| LGAIN | 0                   |
| LKPHS | 0                   |
| LKSIG | 0                   |
| CSPED | 0 Hz                |
| FILDC |                     |
| FILDF |                     |

C:\Documents and Settings\PC-USER\My Documents\Data\okura\ATX\ECX and ECA\als\KO-ATX-BPin-m-PhONB-1H.als

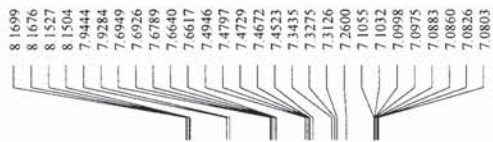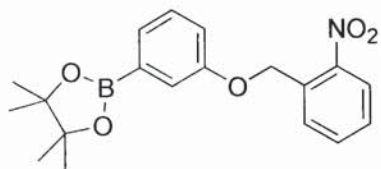

**6b**

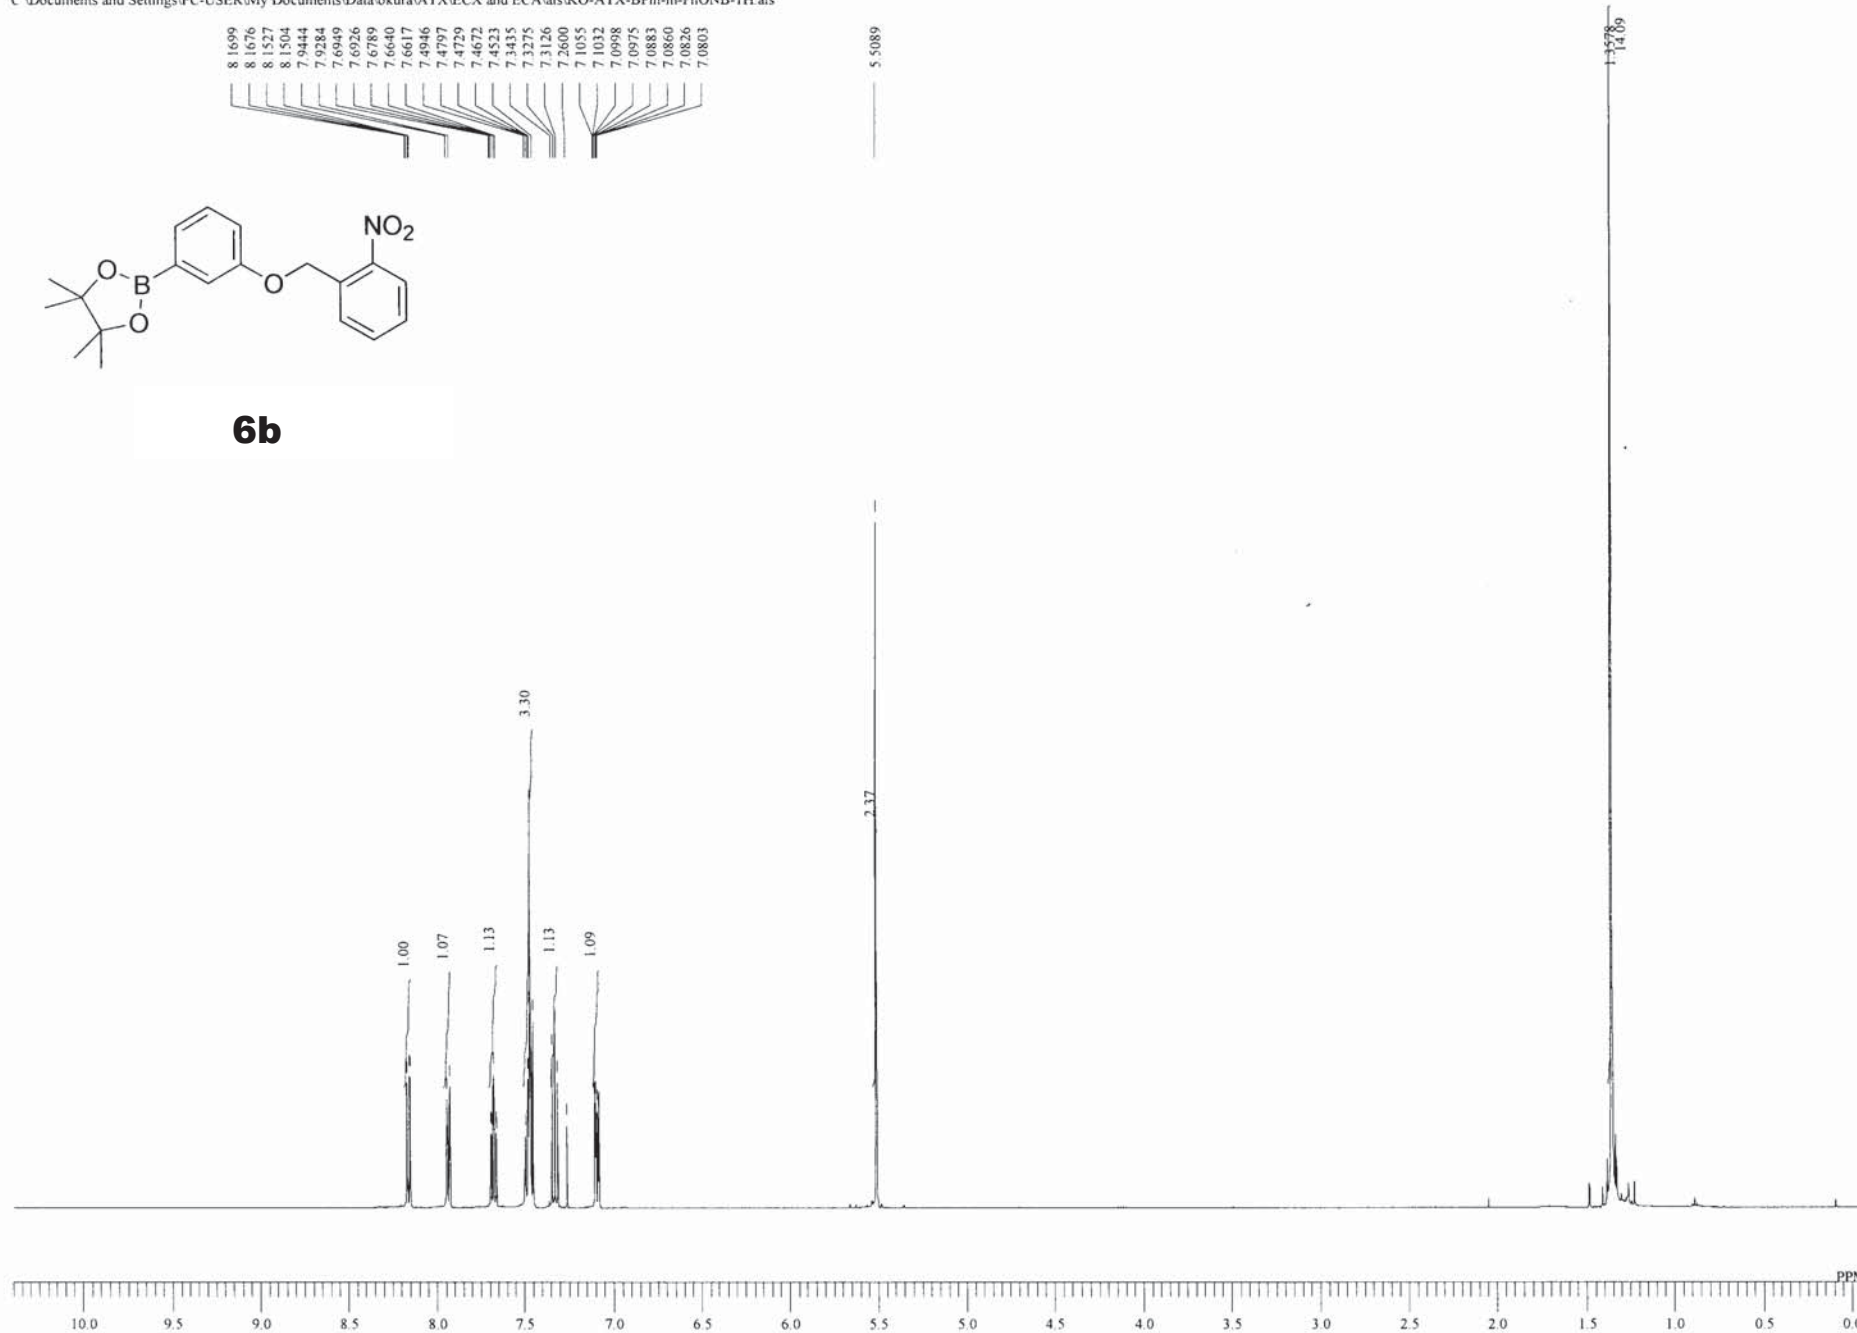

DATIM 02-03-2011 21:36:31  
MENUF  
OBNUC 1H  
OFR 490.15 MHz  
OBSET 9.16 KHz  
OBFIN 7.60 Hz  
PW1 8.55 usec  
DEADT 0.00 usec  
PREDL 0.00000 msec  
IWT 1.0000 sec  
POINT 13107  
SPO 13107  
TIMES 8  
DUMMY 1  
FREQU 7352.83 Hz  
FLT 37000 Hz  
DELAY 13.52 usec  
ACQTM 1.7826 sec  
PD 1.5000 sec  
ADBIT 16  
RGAIN 30  
BF 0.01 Hz  
T1 0.00  
T2 0.00  
T3 90.00  
T4 100.00  
EXMOD single\_pulse.ex2  
EXPCM  
IRNUC 1H  
IFR 490.15 MHz  
IRSET 9.16 KHz  
IRFIN 7.60 Hz  
IRRPW 118 usec  
IRATN 79  
DFILE KO-ATX-BPin-m-PhONE  
SF  
LKSET 70.30 KHz  
LKFIN 32.5 Hz  
LKLEV 0  
LGAIN 0  
LKPHS 0  
LKSIG 0  
CSPED 0 Hz  
FILDC  
FILDF

C:\Documents and Settings\PC-USER\My Documents\Data\okura\ATX\ECX and ECA\als\KO-ATX-BPin-m-PhONB-13C.als

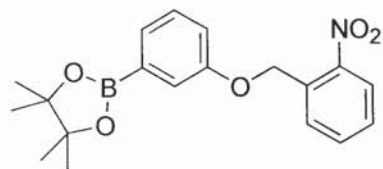

**6b**

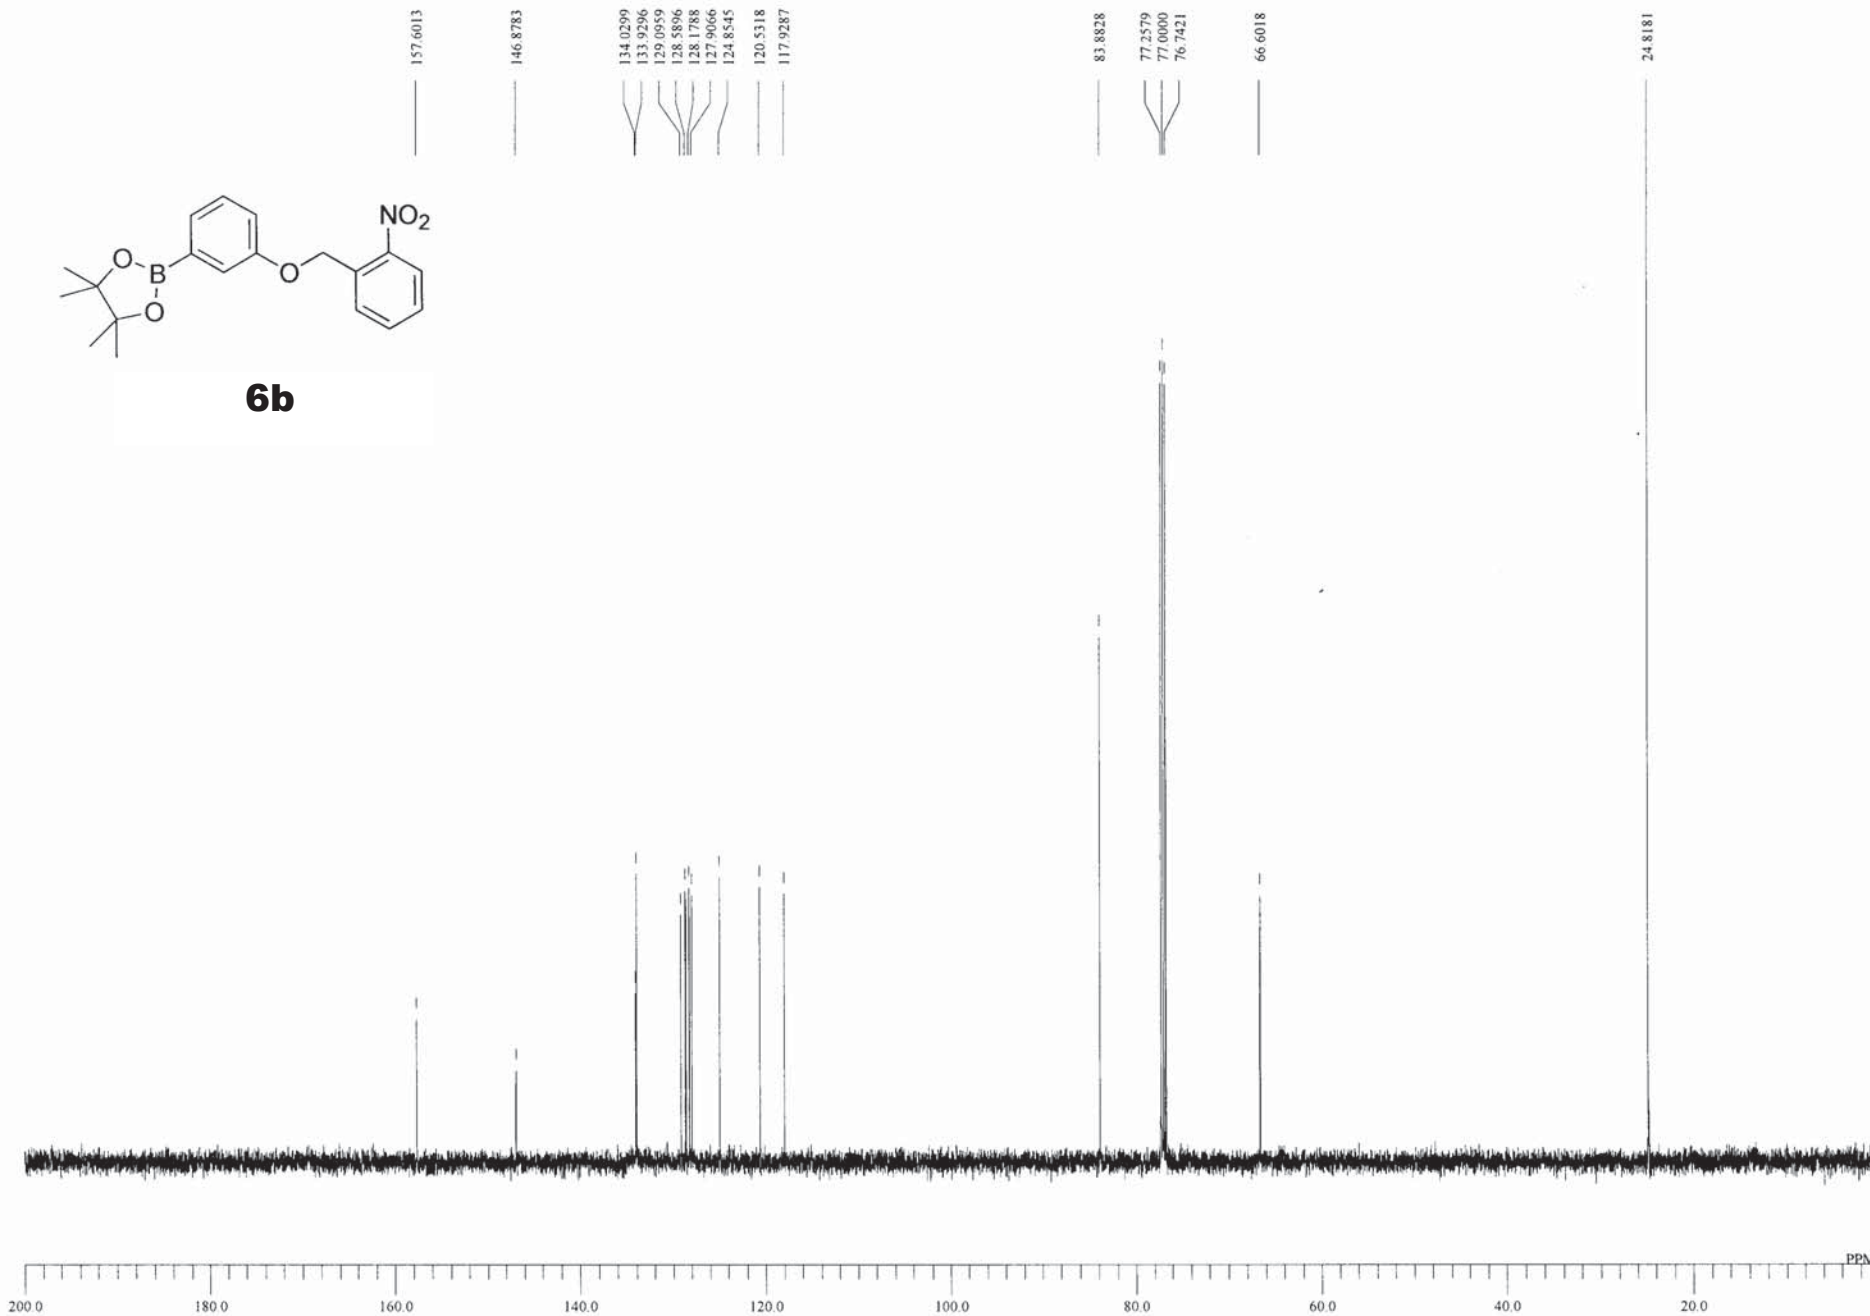

|       |                     |
|-------|---------------------|
| DATIM | 02-03-2011 18:43:59 |
| MENUF |                     |
| OBNUC | 13C                 |
| OFR   | 123.26 MHz          |
| OBSET | 2.31 KHz            |
| OBFIN | 6.71 Hz             |
| PW1   | 3.20 usec           |
| DEADT | 0.00 usec           |
| PREDL | 0.00000 msec        |
| IWT   | 1.0000 sec          |
| POINT | 52428               |
| SPO   | 52428               |
| TIMES | 16                  |
| DUMMY | 4                   |
| FREQU | 30863.73 Hz         |
| FLT   | 155000 Hz           |
| DELAY | 21.06 usec          |
| ACQTM | 0.8493 sec          |
| PD    | 10.0000 sec         |
| ADBIT | 16                  |
| RGAIN | 60                  |
| BF    | 1.00 Hz             |
| T1    | 0.00                |
| T2    | 0.00                |
| T3    | 90.00               |
| T4    | 100.00              |
| EXMOD | single_pulse_dec    |
| EXPCM |                     |
| IRNUC | 13H                 |
| IFR   | 490.15 MHz          |
| IRSET | 9.16 KHz            |
| IRFIN | 7.60 Hz             |
| IRRPW | 92 usec             |
| IRATN | 79                  |
| DFILE | KO-ATX-BPin-m-PhONE |
| SF    |                     |
| LKSET | 70.30 KHz           |
| LKFIN | 32.5 Hz             |
| LKLEV | 0                   |
| LGAIN | 0                   |
| LKPHS | 0                   |
| LKSIG | 0                   |
| CSPED | 0 Hz                |
| FILDC |                     |
| FILDF |                     |

C:\Documents and Settings\PC-USER\My Documents\Data\okura\ATX\ECX and ECA\als\KO-ATX-Bpin-p-PhONB-1H.als

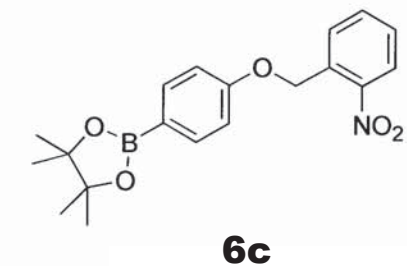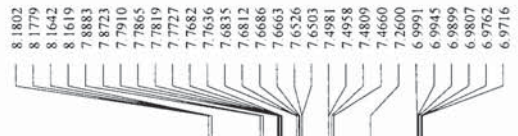

5.5249

1.3384

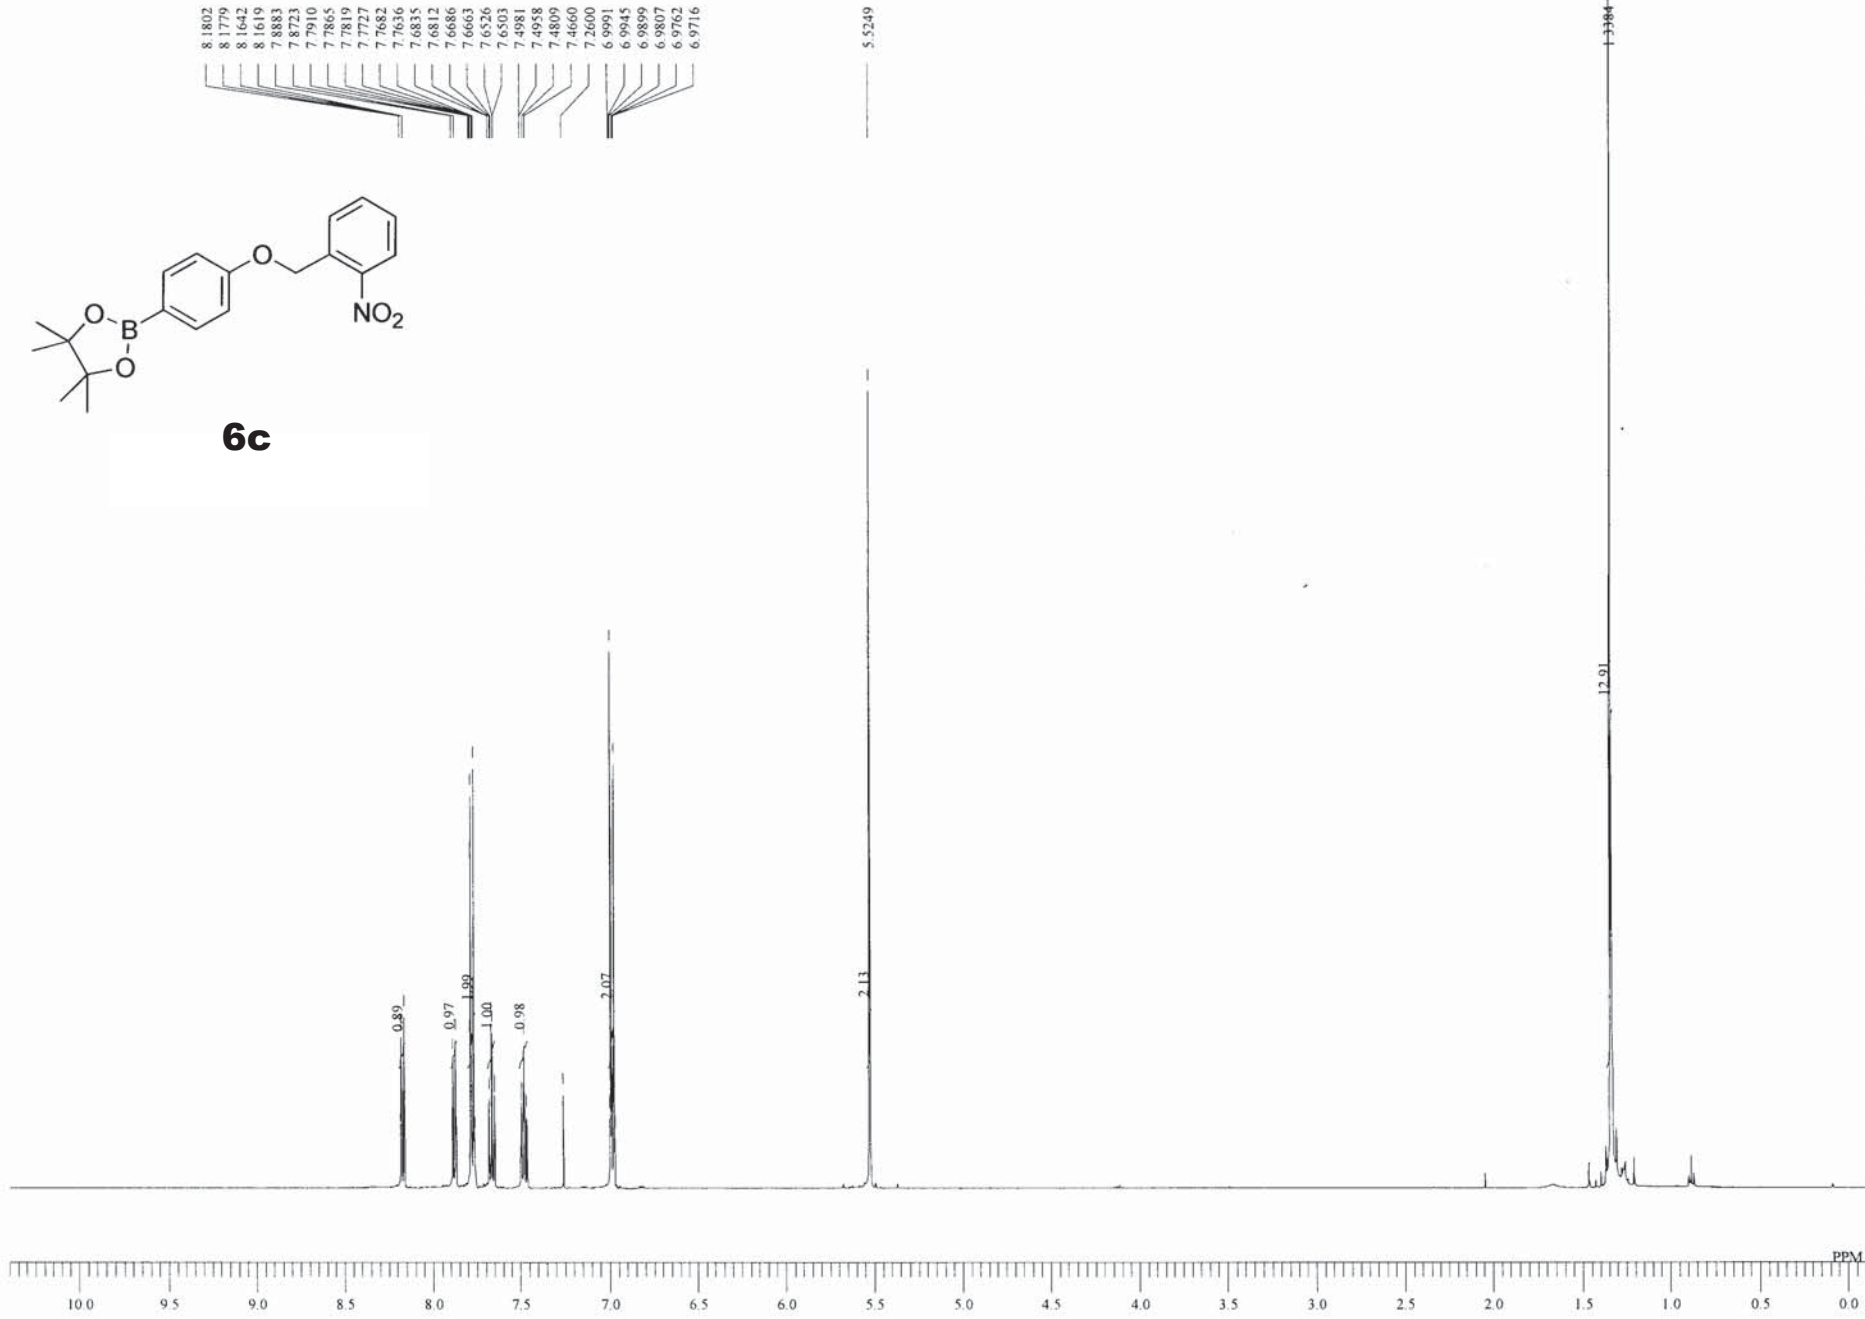

|       |                      |
|-------|----------------------|
| DATIM | 02-03-2011 21:44:37  |
| MENUF |                      |
| OBNUC | 1H                   |
| OFR   | 490.15 MHz           |
| OBSET | 9.16 KHz             |
| OBFIN | 7.60 Hz              |
| PW1   | 8.55 usec            |
| DEADT | 0.00 usec            |
| PREDL | 0.00000 msec         |
| IWT   | 1.0000 sec           |
| POINT | 13107                |
| SPO   | 13107                |
| TIMES | 8                    |
| DUMMY | 1                    |
| FREQU | 7352.83 Hz           |
| FLT   | 37000 Hz             |
| DELAY | 13.52 usec           |
| ACQTM | 1.7826 sec           |
| PD    | 1.5000 sec           |
| ADBIT | 16                   |
| RGAIN | 30                   |
| BF    | 0.01 Hz              |
| T1    | 0.00                 |
| T2    | 0.00                 |
| T3    | 90.00                |
| T4    | 100.00               |
| EXMOD | single_pulse.ex2     |
| EXPCM |                      |
| IRNUC | 1H                   |
| IFR   | 490.15 MHz           |
| IRSET | 9.16 KHz             |
| IRFIN | 7.60 Hz              |
| IRRPW | 118 usec             |
| IRATN | 79                   |
| DFILE | KO-ATX-Bpin-p-PhONB- |
| SF    |                      |
| LKSET | 70.30 KHz            |
| LKFIN | 32.5 Hz              |
| LKLEV | 0                    |
| LGAIN | 0                    |
| LKPHS | 0                    |
| LKSIG | 0                    |
| CSPED | 0 Hz                 |
| FILDC |                      |
| FILDF |                      |



C:\Documents and Settings\PC-USER\My Documents\Data\okura\ATX\ECX and ECA\als\KO-ATX-Bpin-p-PhONB-13C.als

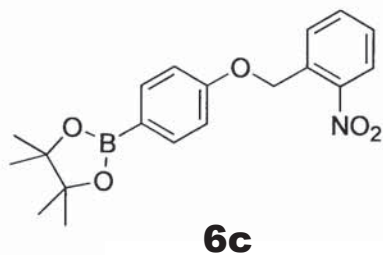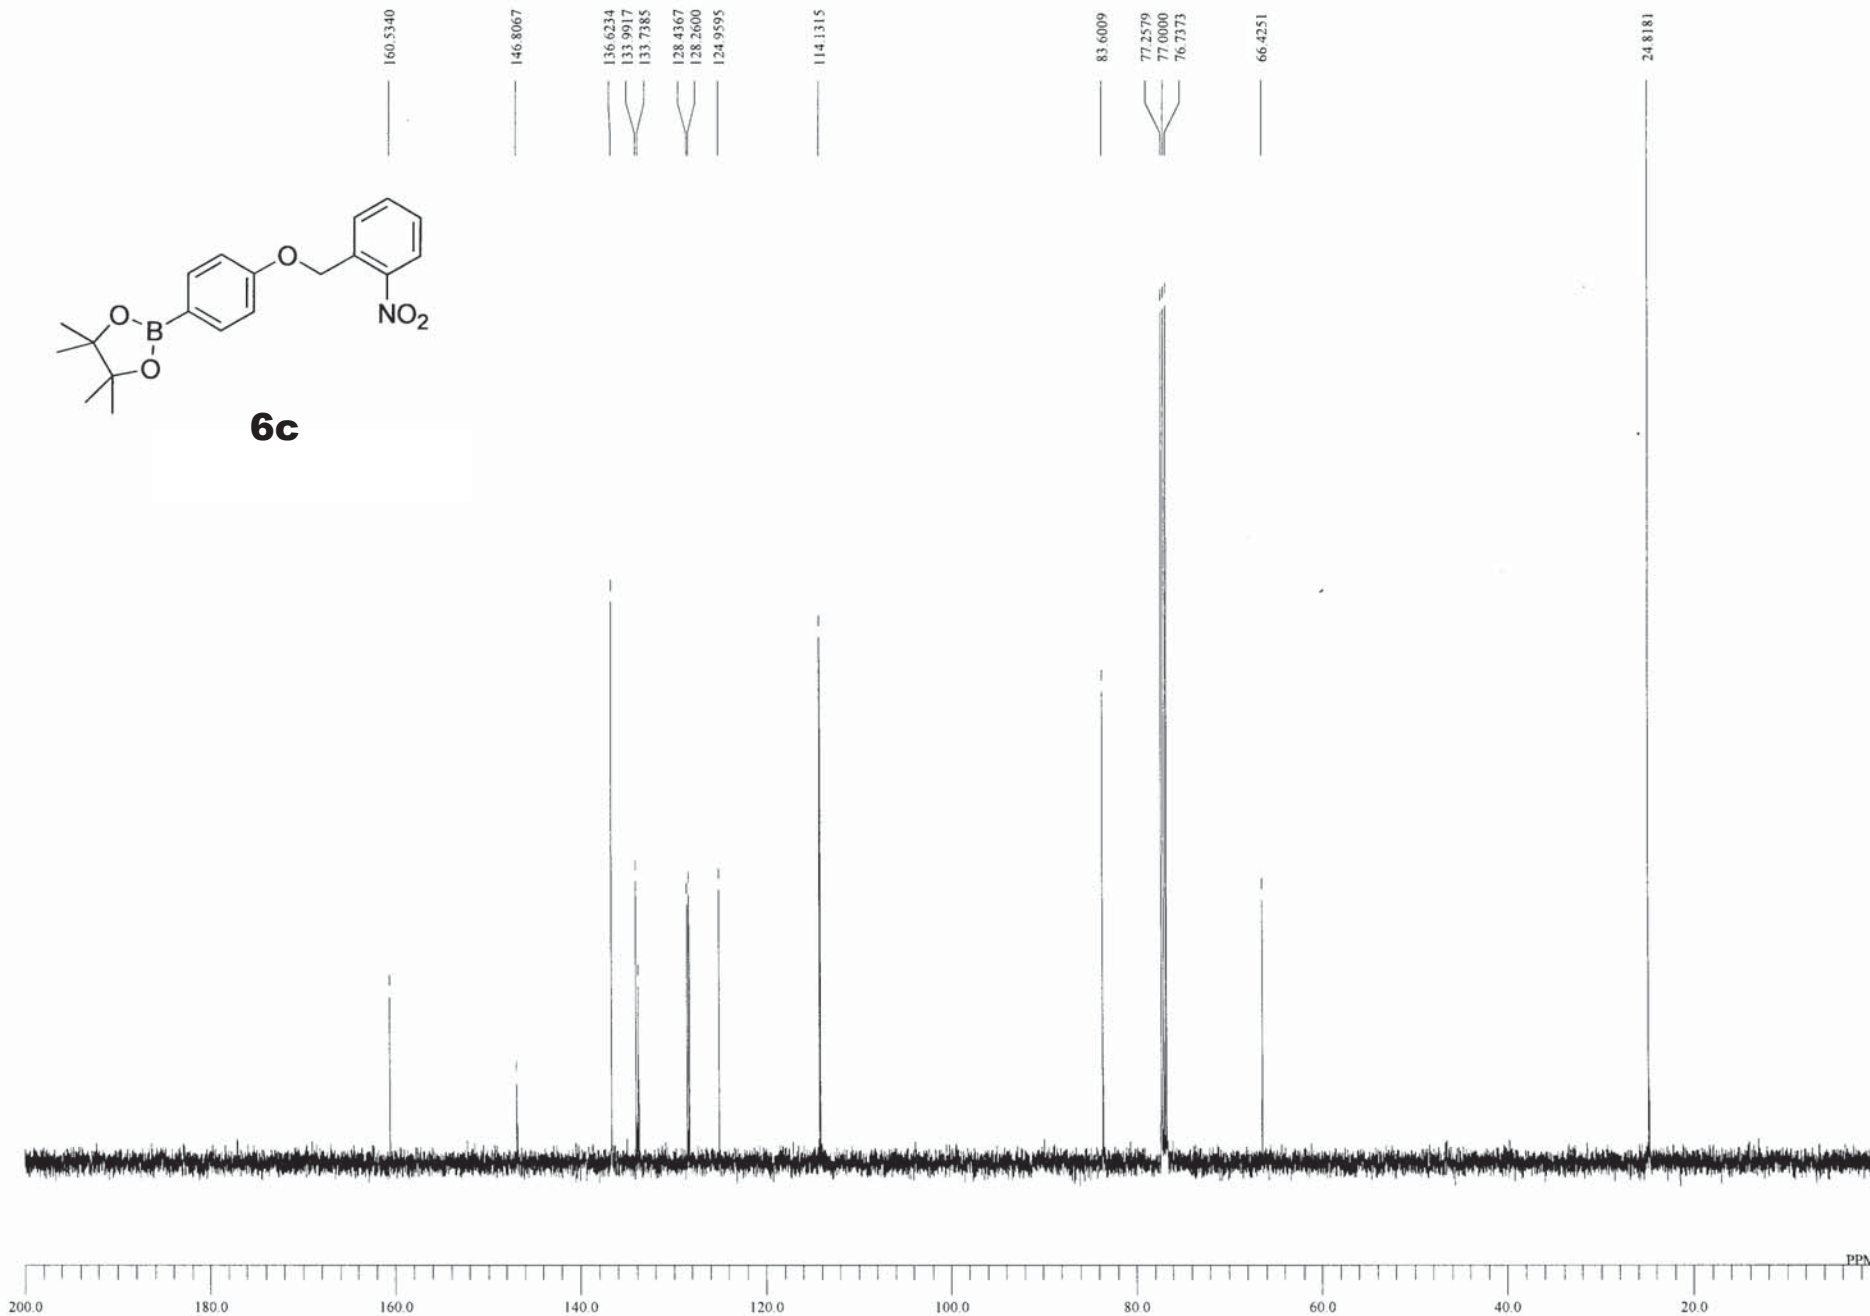

|       |                     |
|-------|---------------------|
| DATIM | 02-03-2011 20:54:41 |
| MENUF |                     |
| OBNUC | 13C                 |
| OFR   | 123.26 MHz          |
| OBSET | 2.31 KHz            |
| OBFIN | 6.71 Hz             |
| PW1   | 3.20 usec           |
| DEADT | 0.00 usec           |
| PREDL | 0.00000 msec        |
| IWT   | 1.0000 sec          |
| POINT | 52428               |
| SPO   | 52428               |
| TIMES | 16                  |
| DUMMY | 4                   |
| FREQU | 30863.73 Hz         |
| FLT   | 155000 Hz           |
| DELAY | 21.06 usec          |
| ACQTM | 0.8493 sec          |
| PD    | 10.0000 sec         |
| ADBIT | 16                  |
| RGAIN | 60                  |
| BF    | 1.00 Hz             |
| T1    | 0.00                |
| T2    | 0.00                |
| T3    | 90.00               |
| T4    | 100.00              |
| EXMOD | single_pulse_dec    |
| EXPCM |                     |
| IRNUC | 1H                  |
| IFR   | 490.15 MHz          |
| IRSET | 9.16 KHz            |
| IRFIN | 7.60 Hz             |
| IRRPW | 92 usec             |
| IRATN | 79                  |
| DFILE | KO-ATX-Bpin-p-PhONB |
| SF    |                     |
| LKSET | 70.30 KHz           |
| LKFIN | 32.5 Hz             |
| LKLEV | 0                   |
| LGAIN | 0                   |
| LKPHS | 0                   |
| LKSIG | 0                   |
| CSPED | 0 Hz                |
| FILDC |                     |
| FILDF |                     |

C:\Documents and Settings\PC-USER\My Documents\Data\okura\ATX\ECX and ECA\als\KO-ATX-o-I-CHO-1H.als

10.0423  
8.0314  
8.0291  
8.0154  
8.0131  
7.9925  
7.9902  
7.9845  
7.9810  
7.9765  
7.9742  
7.9684  
7.9650  
7.9353  
7.9330  
7.9192  
7.9169  
7.9021  
7.8986  
7.8872  
7.8838  
7.8723  
7.8700  
7.8654  
7.8609  
7.8563  
7.8540  
7.8494  
7.8460  
7.4981  
7.4946  
7.4820  
7.4797  
7.4569  
7.4420  
7.4260  
7.4054  
7.4031  
7.3893  
7.3870  
7.3745  
7.3710  
7.3687  
7.3550  
7.3527  
7.3390  
7.2806  
7.2760  
7.2646  
7.2611  
7.2497  
7.2451  
7.1593  
7.1559  
7.1433  
7.1398  
7.1284  
7.1249  
7.0460  
7.0425  
7.0311  
7.0277  
7.0151  
7.0116  
5.3727

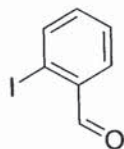

9

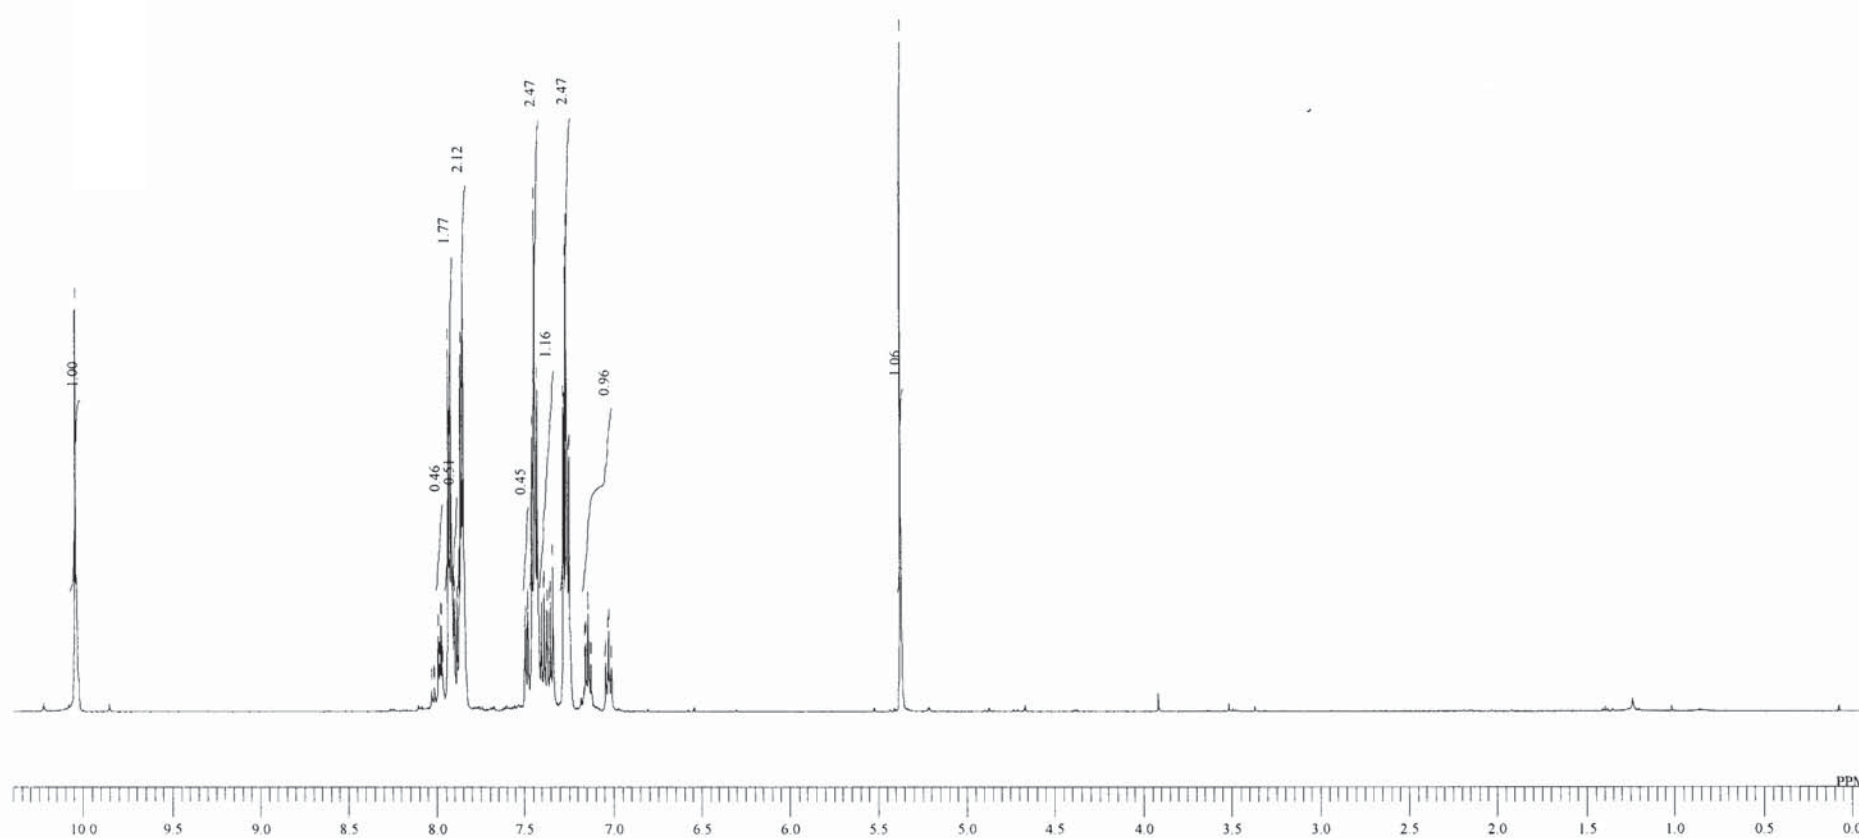

DATIM 08-03-2011 12:55:47  
MENUF  
OBNUC 1H  
OFR 490.15 MHz  
OBSET 9.16 KHz  
OBFIN 7.60 Hz  
PW1 8.55 usec  
DEADT 0.00 usec  
PREDL 0.00000 msec  
IWT 1.0000 sec  
POINT 13107  
SPO 13107  
TIMES 8  
DUMMY 1  
FREQU 7352.83 Hz  
FLT 37000 Hz  
DELAY 13.52 usec  
ACQTM 1.7826 sec  
PD 1.5000 sec  
ADBIT 16  
RGAIN 40  
BF 0.01 Hz  
T1 0.00  
T2 0.00  
T3 90.00  
T4 100.00  
EXMOD single\_pulse ex2  
EXPCM  
IRNUC 1H  
IFR 490.15 MHz  
IRSET 9.16 KHz  
IRFIN 7.60 Hz  
IRRPW 118 usec  
IRATN 79  
DFILE KO-ATX-o-I-CHO-1H.als  
SF  
LKSET 70.30 KHz  
LKFIN 32.5 Hz  
LKLEV 0  
LGAIN 0  
LKPHS 0  
LKSIG 0  
CSPED 0 Hz  
FILDC  
FILDF

C:\Documents and Settings\PC-USER\My Documents\Data\okura\ATX\ECX and ECA\als\KO-ATX-o-I-CHO-13C.als

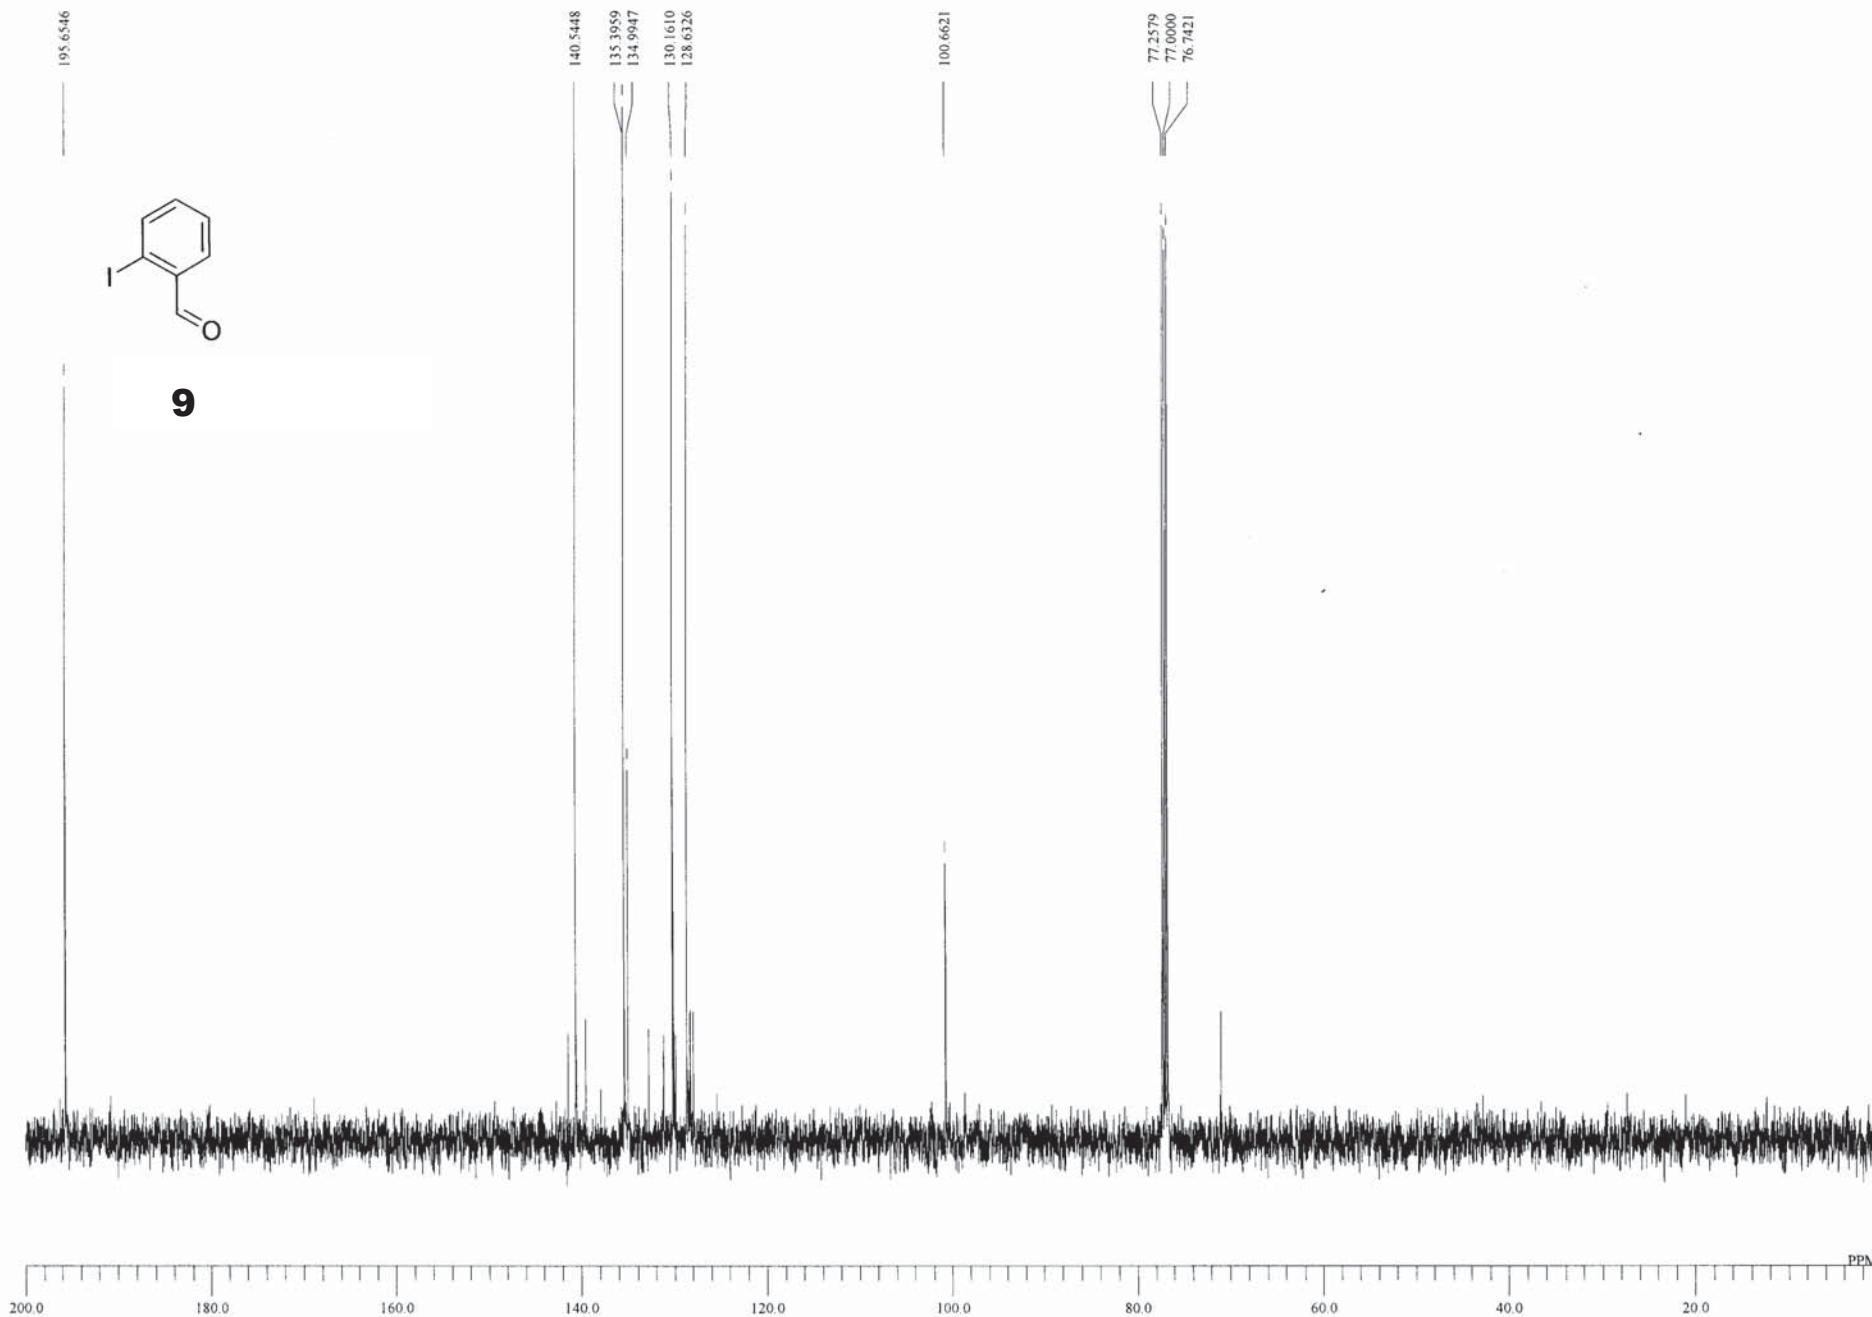

|       |                      |
|-------|----------------------|
| DATIM | 08-03-2011 12:59:29  |
| MENUF |                      |
| OBNUC | 13C                  |
| OFR   | 123.26 MHz           |
| OBSET | 2.31 KHz             |
| OBFIN | 6.71 Hz              |
| PW1   | 3.20 usec            |
| DEADT | 0.00 usec            |
| PREDL | 0.00000 msec         |
| IWT   | 1.0000 sec           |
| POINT | 26214                |
| SPO   | 26214                |
| TIMES | 16                   |
| DUMMY | 4                    |
| FREQU | 30863.73 Hz          |
| FLT   | 155000 Hz            |
| DELAY | 21.06 usec           |
| ACQTM | 0.8493 sec           |
| PD    | 10.0000 sec          |
| ADBIT | 16                   |
| RGAIN | 60                   |
| BF    | 2.00 Hz              |
| T1    | 0.00                 |
| T2    | 0.00                 |
| T3    | 90.00                |
| T4    | 100.00               |
| EXMOD | single_pulse_dec     |
| EXPCM |                      |
| IRNUC | 1H                   |
| IFR   | 490.15 MHz           |
| IRSET | 9.16 KHz             |
| IRFIN | 7.60 Hz              |
| IRRPW | 92 usec              |
| IRATN | 79                   |
| DFILE | KO-ATX-o-I-CHO-13C.a |
| SF    |                      |
| LKSET | 70.30 KHz            |
| LKFIN | 32.5 Hz              |
| LKLEV | 0                    |
| LGAIN | 0                    |
| LKPHS | 0                    |
| LKSIG | 0                    |
| CSPED | 0 Hz                 |
| FILDC |                      |
| FILDF |                      |

C:\Documents and Settings\PC-USER\My Documents\Data\okura\ATX\ECX and ECA\als\KO-ATX-1-o-CH(ONB)2-1H.als

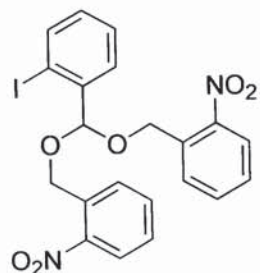

**10**

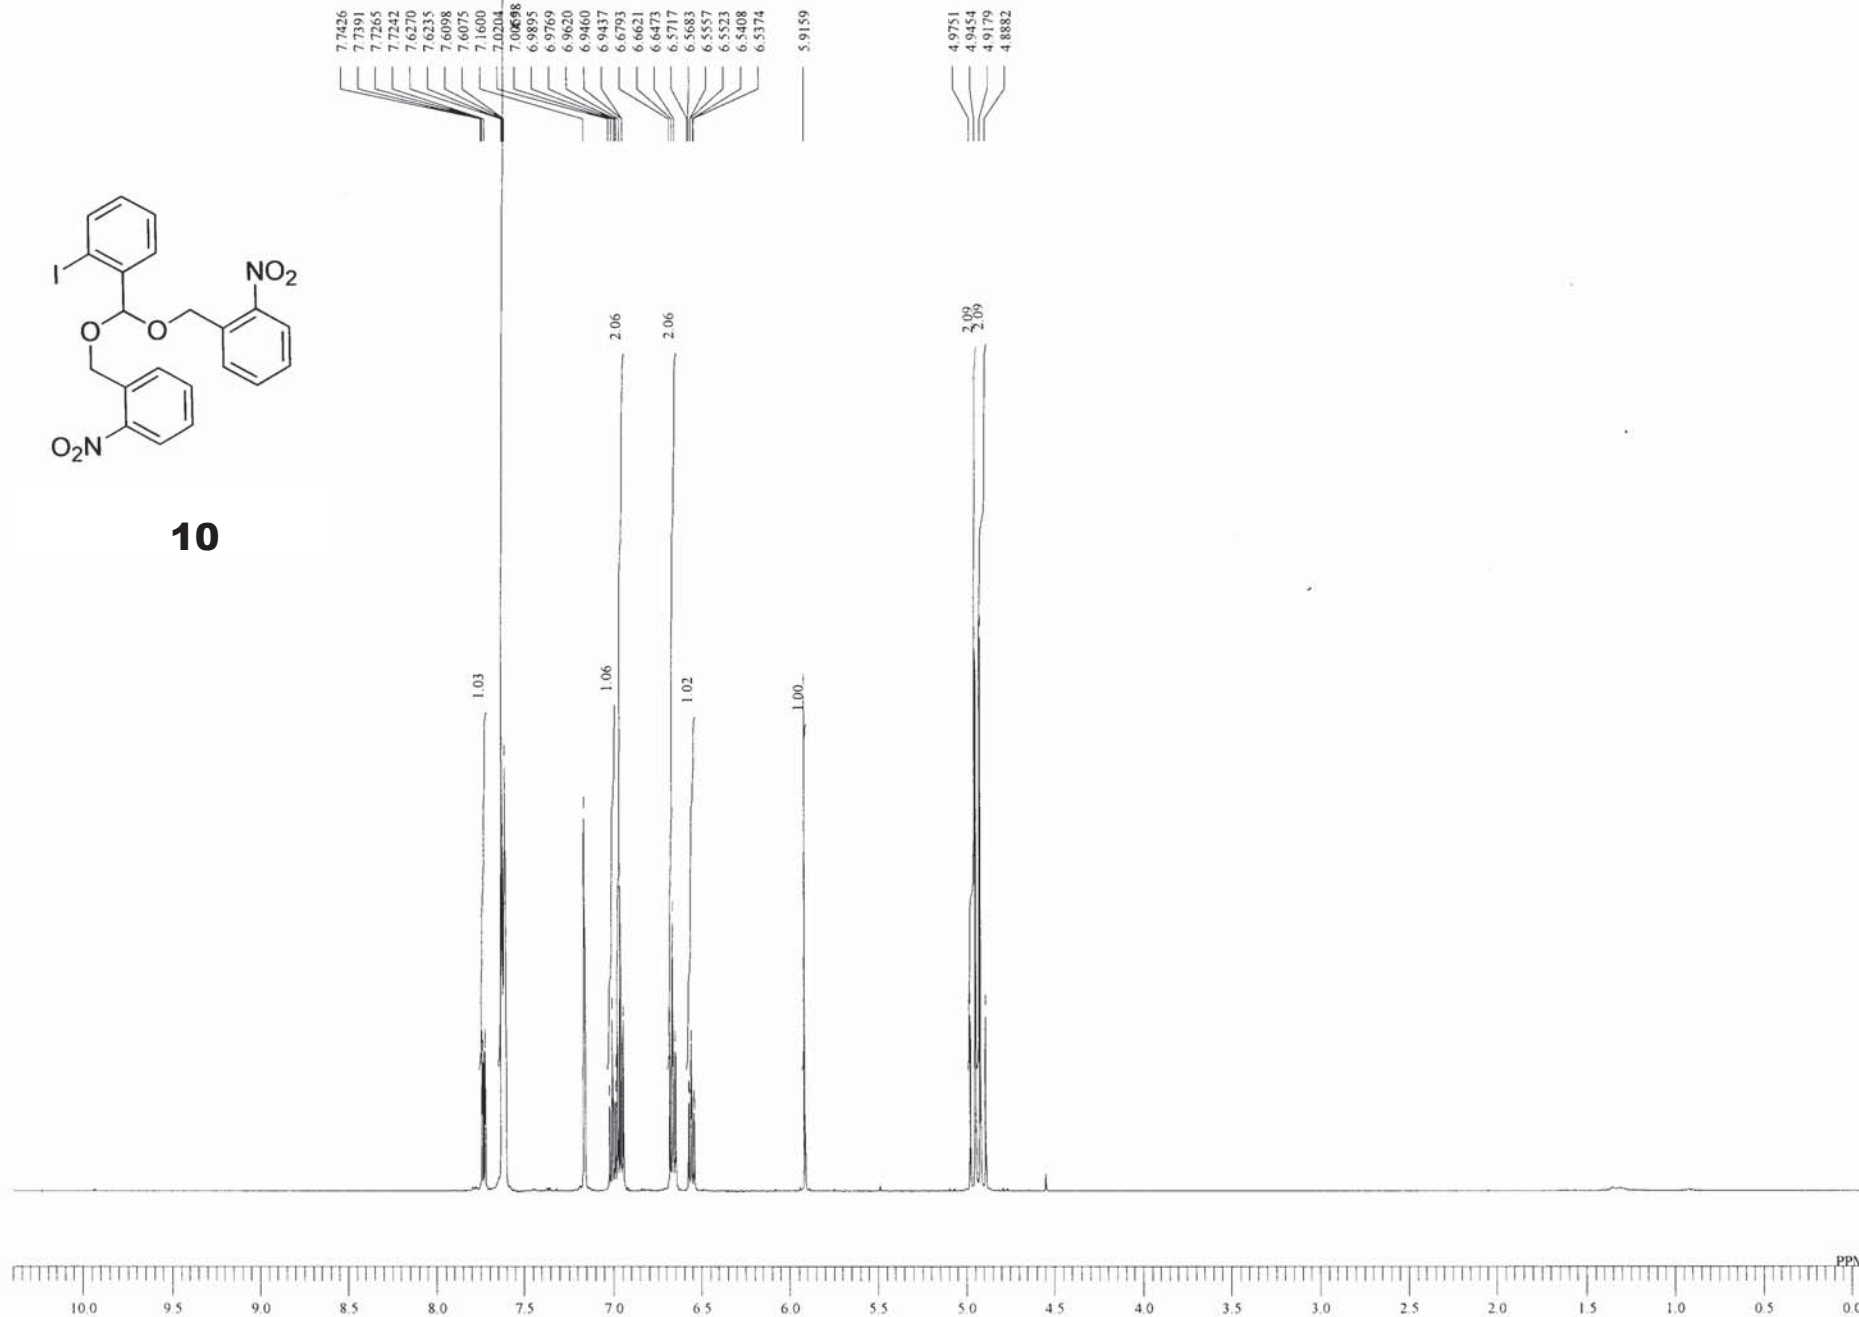

|       |                      |
|-------|----------------------|
| DATIM | 04-03-2011 16:43:00  |
| MENUF |                      |
| OBNUC | <sup>1</sup> H       |
| OFR   | 490.15 MHz           |
| OBSET | 9.16 KHz             |
| OBFIN | 7.60 Hz              |
| PW1   | 8.55 usec            |
| DEADT | 0.00 usec            |
| PREDL | 0.00000 msec         |
| IWT   | 1.0000 sec           |
| POINT | 13107                |
| SPO   | 13107                |
| TIMES | 8                    |
| DUMMY | 1                    |
| FREQU | 7352.83 Hz           |
| FLT   | 37000 Hz             |
| DELAY | 13.52 usec           |
| ACQTM | 1.7826 sec           |
| PD    | 5.0000 sec           |
| ADBIT | 16                   |
| RGAIN | 34                   |
| BF    | 0.01 Hz              |
| T1    | 0.00                 |
| T2    | 0.00                 |
| T3    | 90.00                |
| T4    | 100.00               |
| EXMOD | single_pulse ex2     |
| EXPCM |                      |
| IRNUC | <sup>1</sup> H       |
| IFR   | 490.15 MHz           |
| IRSET | 9.16 KHz             |
| IRFIN | 7.60 Hz              |
| IRRPW | 118 usec             |
| IRATN | 79                   |
| DFILE | KO-ATX-1-o-CH(ONB)2- |
| SF    |                      |
| LKSET | 70.30 KHz            |
| LKFIN | 29.2 Hz              |
| LKLEV | 0                    |
| LGAIN | 0                    |
| LKPHS | 0                    |
| LKSIG | 0                    |
| CSPED | 0 Hz                 |
| FILDC |                      |
| FILDF |                      |

C:\Documents and Settings\PC-USER\My Documents\Data\okura\ATX\ECX and ECA\als\KO-ATX-I-o-CH(ONB)2-13C.als

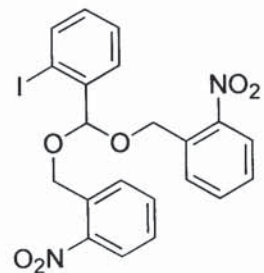

**10**

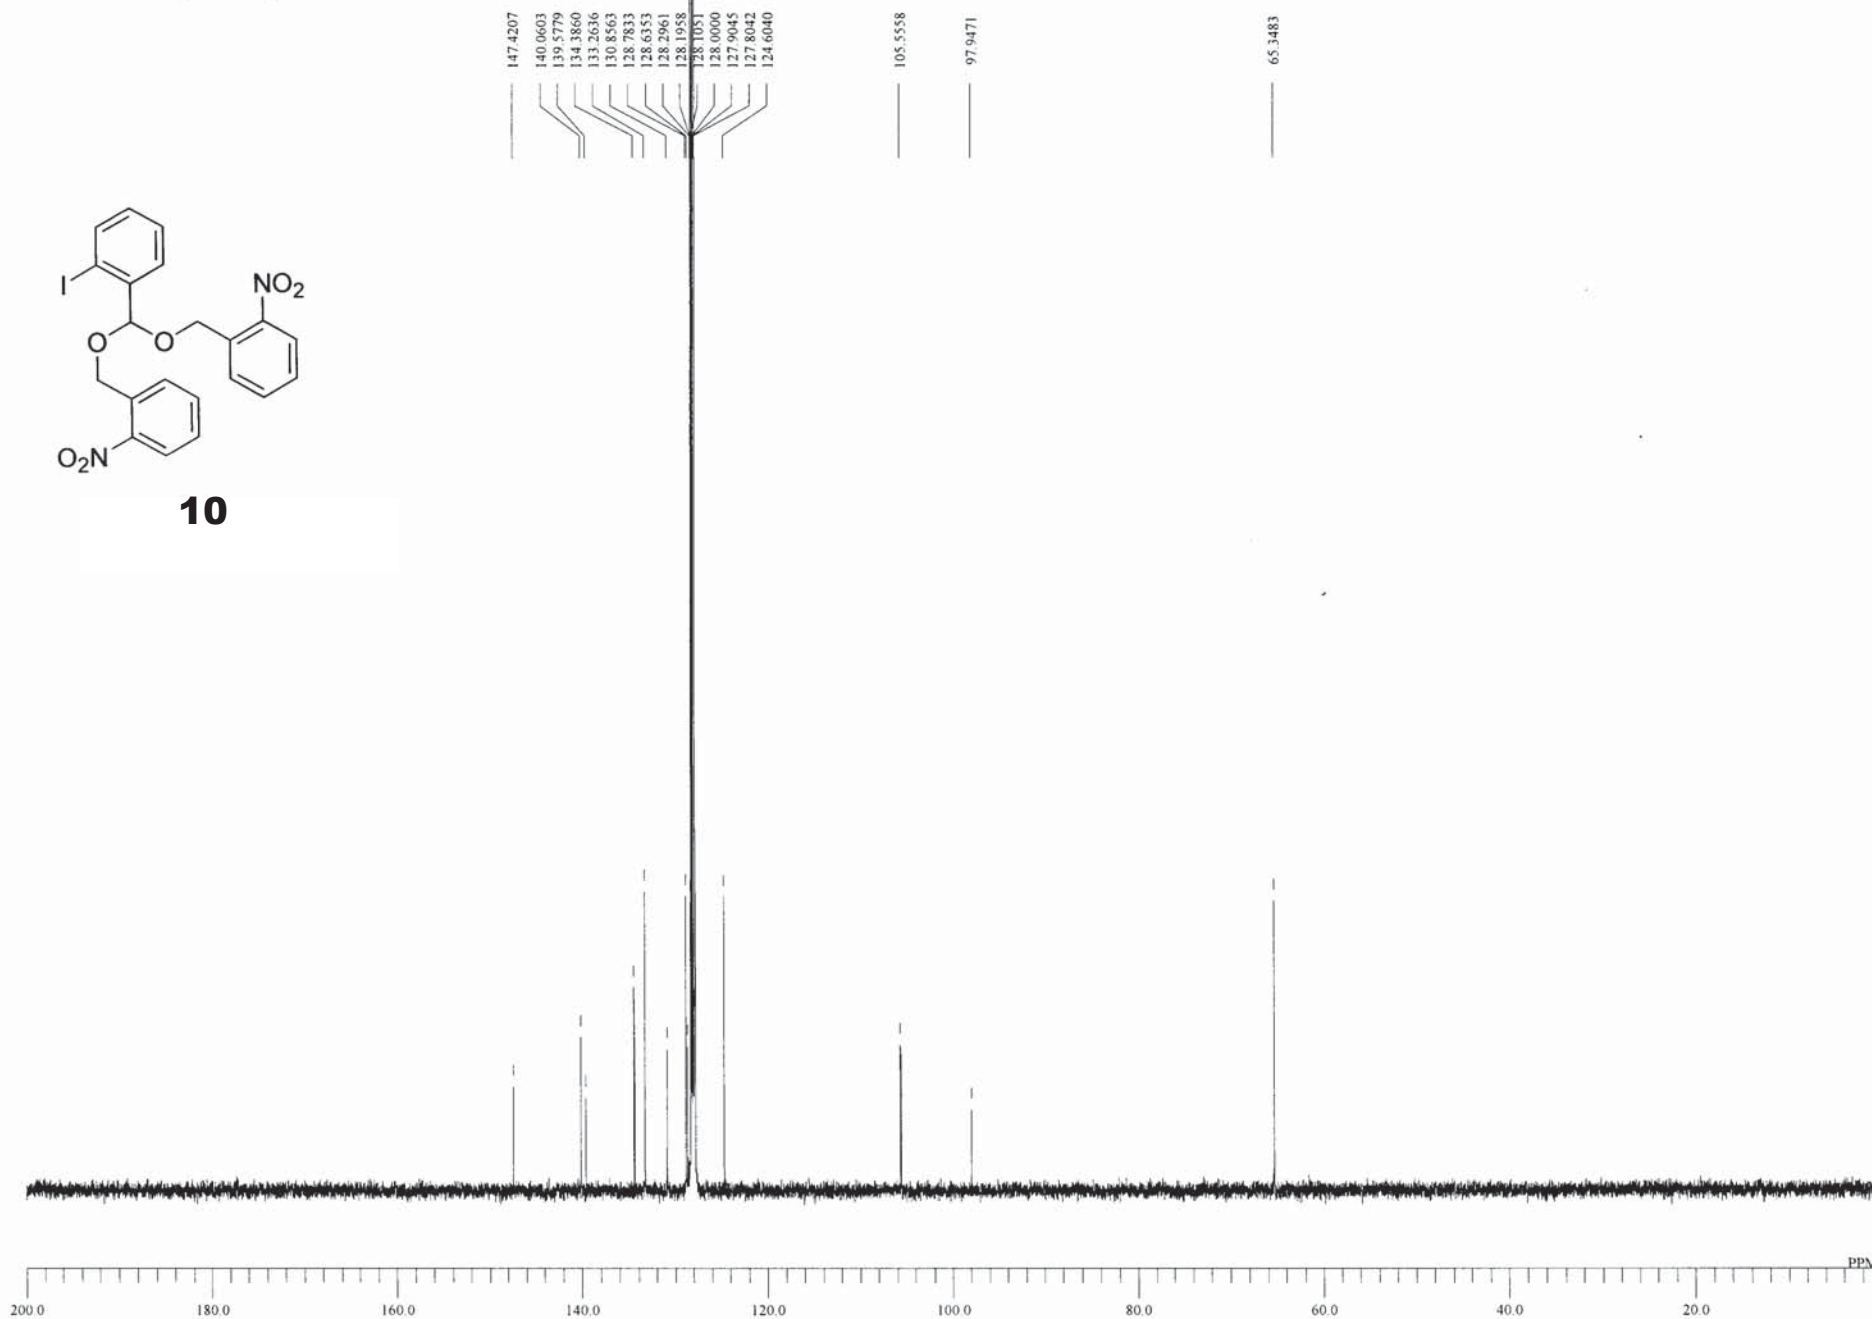

|       |                      |
|-------|----------------------|
| DATIM | 04-03-2011 16:49:37  |
| MENUF |                      |
| OBNUC | 13C                  |
| OFR   | 123.26 MHz           |
| OBSET | 2.31 KHz             |
| OBFIN | 6.71 Hz              |
| PW1   | 3.20 usec            |
| DEADT | 0.00 usec            |
| PREDL | 0.00000 msec         |
| IWT   | 1.0000 sec           |
| POINT | 52428                |
| SPO   | 52428                |
| TIMES | 32                   |
| DUMMY | 4                    |
| FREQU | 30863.73 Hz          |
| FLT   | 155000 Hz            |
| DELAY | 21.06 usec           |
| ACQTM | 0.8493 sec           |
| PD    | 10.0000 sec          |
| ADBIT | 16                   |
| RGAIN | 60                   |
| BF    | 1.00 Hz              |
| T1    | 0.00                 |
| T2    | 0.00                 |
| T3    | 90.00                |
| T4    | 100.00               |
| EXMOD | single_pulse_dec     |
| EXPCM |                      |
| IRNUC | 1H                   |
| IFR   | 490.15 MHz           |
| IRSET | 9.16 KHz             |
| IRFIN | 7.60 Hz              |
| IRRPW | 92 usec              |
| IRATN | 79                   |
| DFILE | KO-ATX-I-o-CH(ONB)2- |
| SF    |                      |
| LKSET | 70.30 KHz            |
| LKFIN | 29.2 Hz              |
| LKLEV | 0                    |
| LGAIN | 0                    |
| LKPHS | 0                    |
| LKSIG | 0                    |
| CSPED | 0 Hz                 |
| FILDC |                      |
| FILDF |                      |

C:\Documents and Settings\PC-USER\My Documents\Data\okura\ATX\ECX and ECA\als\KO-ATX-BPin-o-CH(ONB)2-1H.als

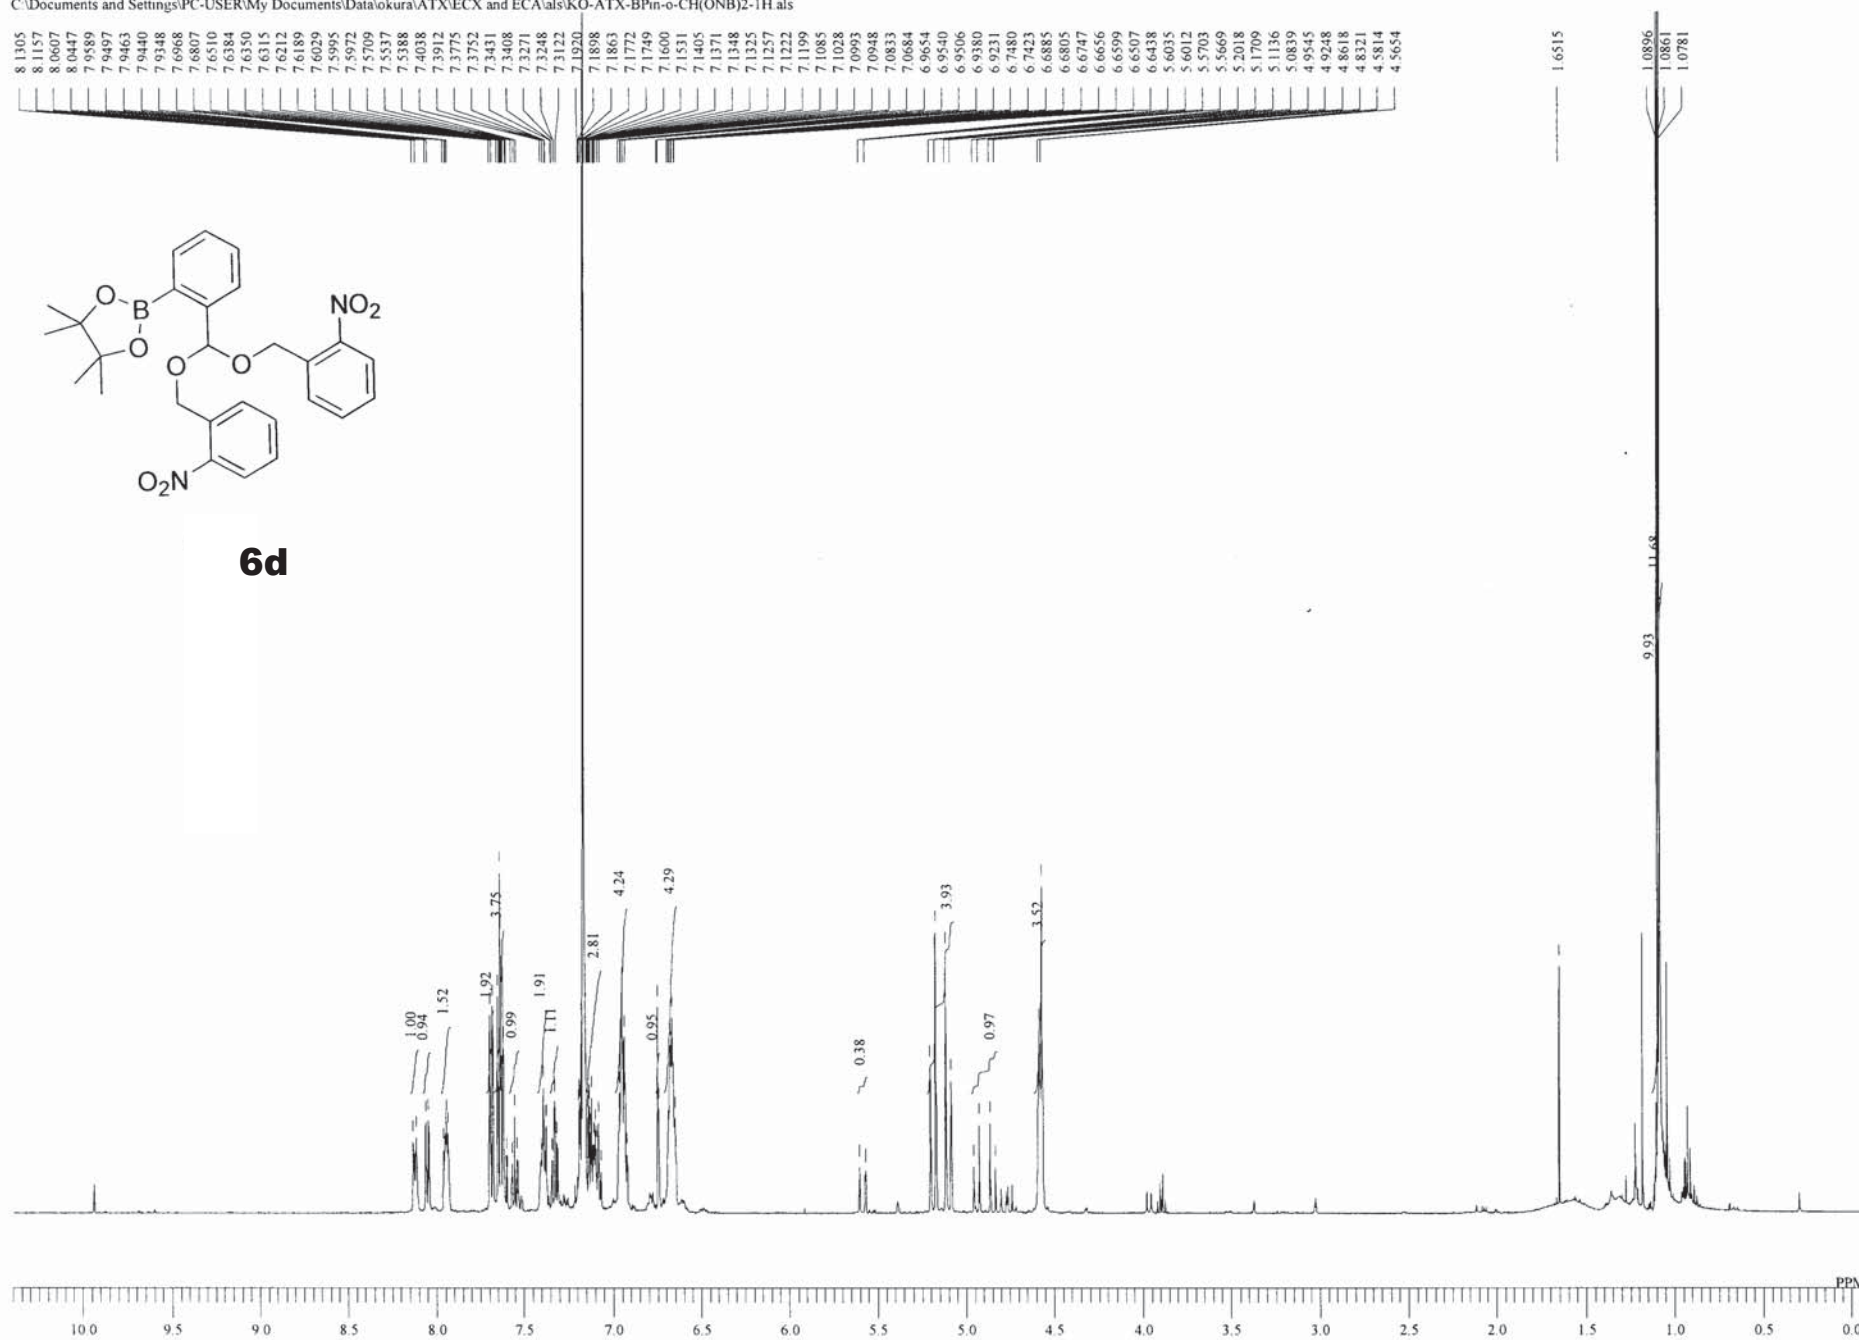

|       |                     |
|-------|---------------------|
| DATIM | 04-03-2011 17:15:42 |
| MENUF |                     |
| OBNUC | <sup>1</sup> H      |
| OFR   | 490.15 MHz          |
| OBSET | 9.16 KHz            |
| OBFIN | 7.60 Hz             |
| PWI   | 8.55 usec           |
| DEADT | 0.00 usec           |
| PREDL | 0.00000 msec        |
| IWT   | 1.0000 sec          |
| POINT | 13107               |
| SPO   | 13107               |
| TIMES | 8                   |
| DUMMY | 1                   |
| FREQU | 7352.83 Hz          |
| FLT   | 37000 Hz            |
| DELAY | 13.52 usec          |
| ACQTM | 1.7826 sec          |
| PD    | 5.0000 sec          |
| ADBIT | 16                  |
| RGAIN | 32                  |
| BF    | 0.01 Hz             |
| T1    | 0.00                |
| T2    | 0.00                |
| T3    | 90.00               |
| T4    | 100.00              |
| EXMOD | single_pulse ex2    |
| EXPCM |                     |
| IRNUC | <sup>1</sup> H      |
| IFR   | 490.15 MHz          |
| IRSET | 9.16 KHz            |
| IRFIN | 7.60 Hz             |
| IRRPW | 118 usec            |
| IRATN | 79                  |
| DFILE | KO-ATX-BPin-o-CH(ON |
| SF    |                     |
| LKSET | 70.30 KHz           |
| LKFIN | 29.2 Hz             |
| LKLEV | 0                   |
| LGAIN | 0                   |
| LKPHS | 0                   |
| LKSIG | 0                   |
| CSPED | 0 Hz                |
| FILDC |                     |
| FILDF |                     |

C:\Documents and Settings\PC-USER\My Documents\Data\okura\ATX\ECX and ECA\als\KO-ATX-BPin-o-CH(ONB)2-13C.als

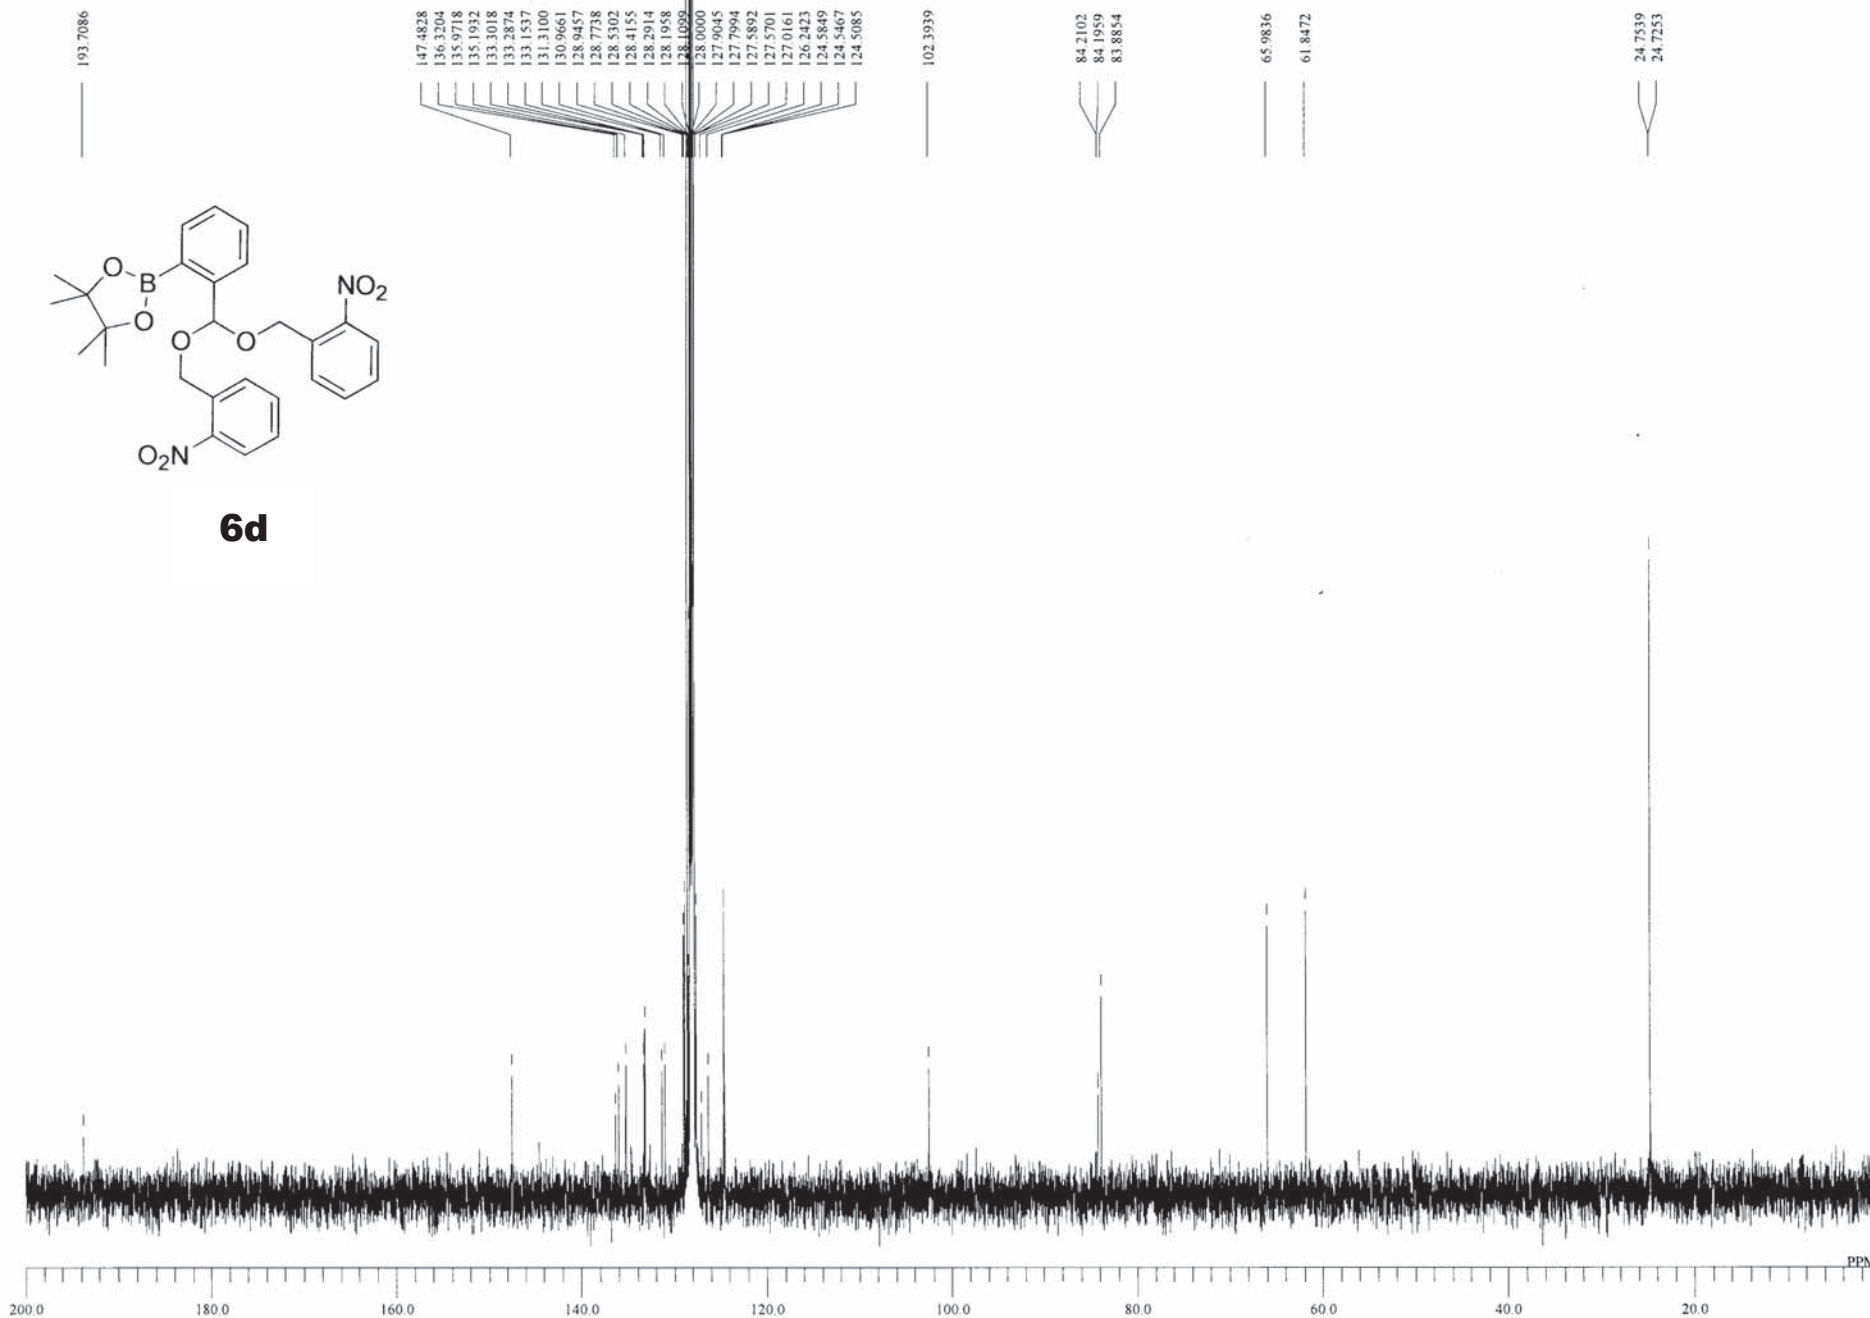

DATIM 04-03-2011 17.22.19  
 MENU/ OBNUC 13C  
 OFR 123.26 MHz  
 OBSET 2.31 KHz  
 OBFIN 6.71 Hz  
 PW1 3.20 usec  
 DEADT 0.00 usec  
 PREDL 0.00000 msec  
 IWT 1.0000 sec  
 POINT 52428  
 SPO 52428  
 TIMES 32  
 DUMMY 4  
 FREQU 30863.73 Hz  
 FLT 155000 Hz  
 DELAY 21.06 usec  
 ACQTM 0.8493 sec  
 PD 10.0000 sec  
 ADBIT 16  
 RGAIN 60  
 BF 1.00 Hz  
 T1 0.00  
 T2 0.00  
 T3 90.00  
 T4 100.00  
 EXMOD single\_pulse\_dec  
 EXPCM  
 IRNUC 1H  
 IFR 490.15 MHz  
 IRSET 9.16 KHz  
 IRFIN 7.60 Hz  
 IRRPW 92 usec  
 IRATN 79  
 DFILE KO-ATX-BPin-o-CH(ON  
 SF  
 LKSET 70.30 KHz  
 LKFIN 29.2 Hz  
 LKLEV 0  
 LGAIN 0  
 LKPHS 0  
 LKSIG 0  
 CSPED 0 Hz  
 FILDC  
 FILDF

C:\Documents and Settings\PC-USER\My Documents\Data\okura\ATX\ECX and ECA\als\KO-ATX-m-BPin-CHO-1H.als

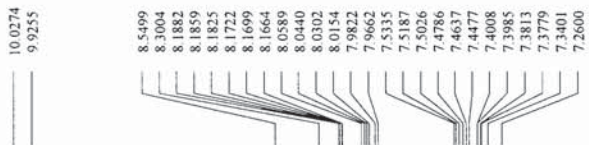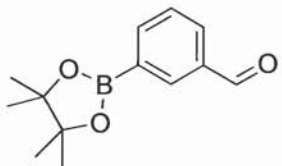

**11e**

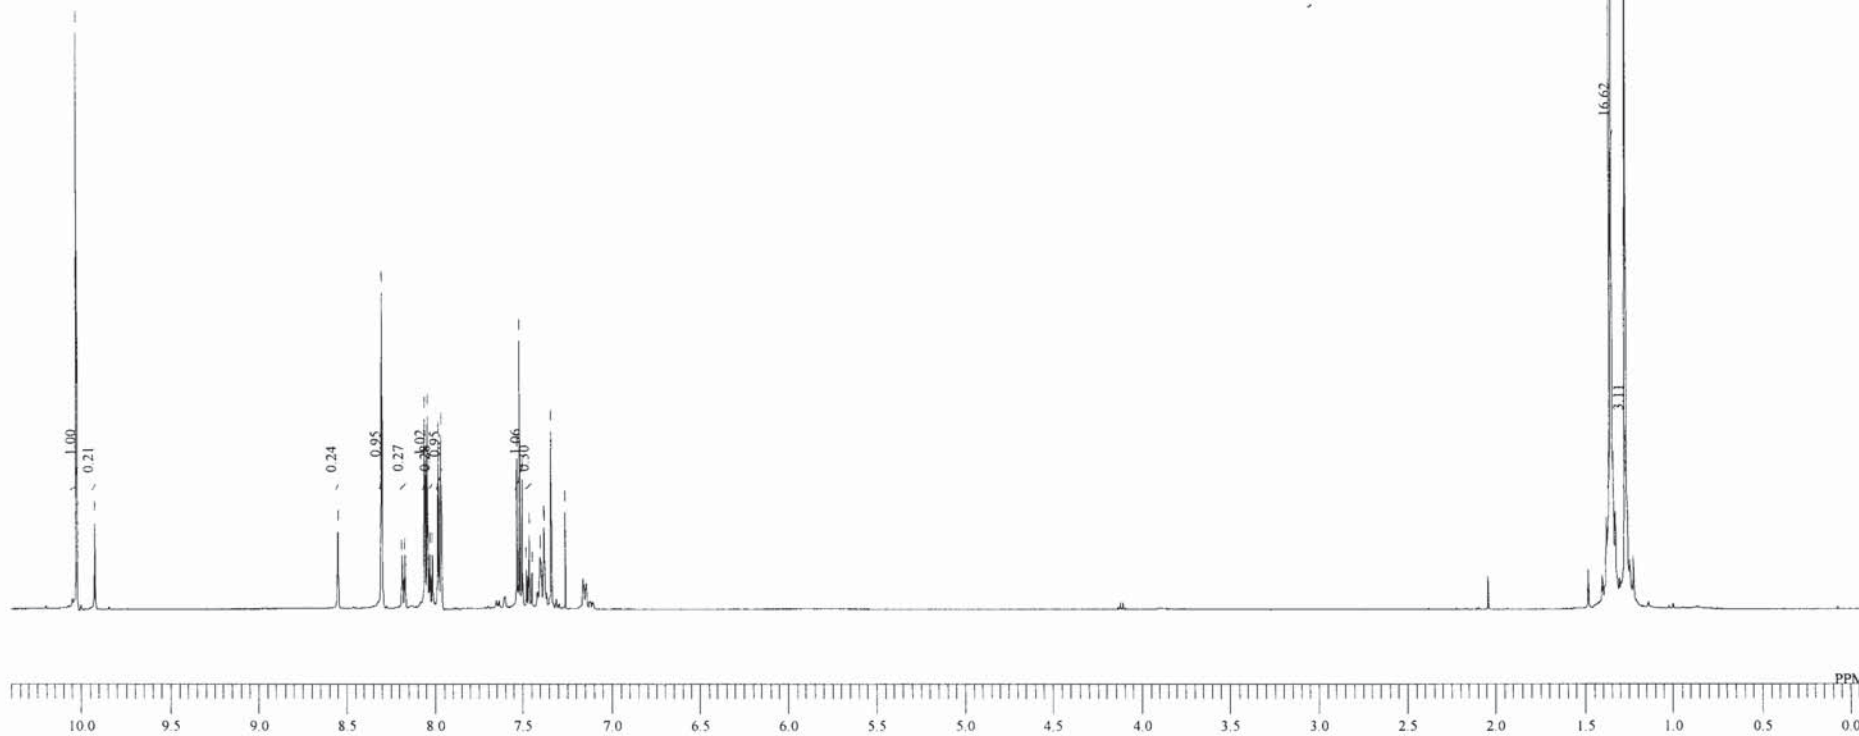

|       |                     |
|-------|---------------------|
| DATIM | 08-03-2011 12:24:50 |
| MENUF |                     |
| OBNUC | <sup>1</sup> H      |
| OFR   | 490.15 MHz          |
| OBSET | 9.16 KHz            |
| OBFIN | 7.60 Hz             |
| PW1   | 8.55 usec           |
| DEADT | 0.00 usec           |
| PREDL | 0.00000 msec        |
| IWT   | 1.0000 sec          |
| POINT | 13107               |
| SPO   | 13107               |
| TIMES | 8                   |
| DUMMY | 1                   |
| FREQU | 7352.83 Hz          |
| FLT   | 37000 Hz            |
| DELAY | 13.52 usec          |
| ACQTM | 1.7826 sec          |
| PD    | 1.5000 sec          |
| ADBIT | 16                  |
| RGAIN | 30                  |
| BF    | 0.01 Hz             |
| T1    | 0.00                |
| T2    | 0.00                |
| T3    | 90.00               |
| T4    | 100.00              |
| EXMOD | single_pulse ex2    |
| EXPCM |                     |
| IRNUC | <sup>1</sup> H      |
| IFR   | 490.15 MHz          |
| IRSET | 9.16 KHz            |
| IRFIN | 7.60 Hz             |
| IRRPW | 118 usec            |
| IRATN | 79                  |
| DFILE | KO-ATX-m-BPin-CHO-1 |
| SF    |                     |
| LKSET | 70.30 KHz           |
| LKFIN | 32.5 Hz             |
| LKLEV | 0                   |
| LGAIN | 0                   |
| LKPHS | 0                   |
| LKSIG | 0                   |
| CSPED | 0 Hz                |
| FILDC |                     |
| FILDF |                     |



C:\Documents and Settings\PC-USER\My Documents\Data\okura\ATX\ECX and ECA\als\KO-ATX-m-BPin-CHO-13C.als

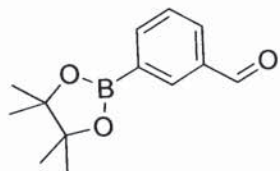

**11e**

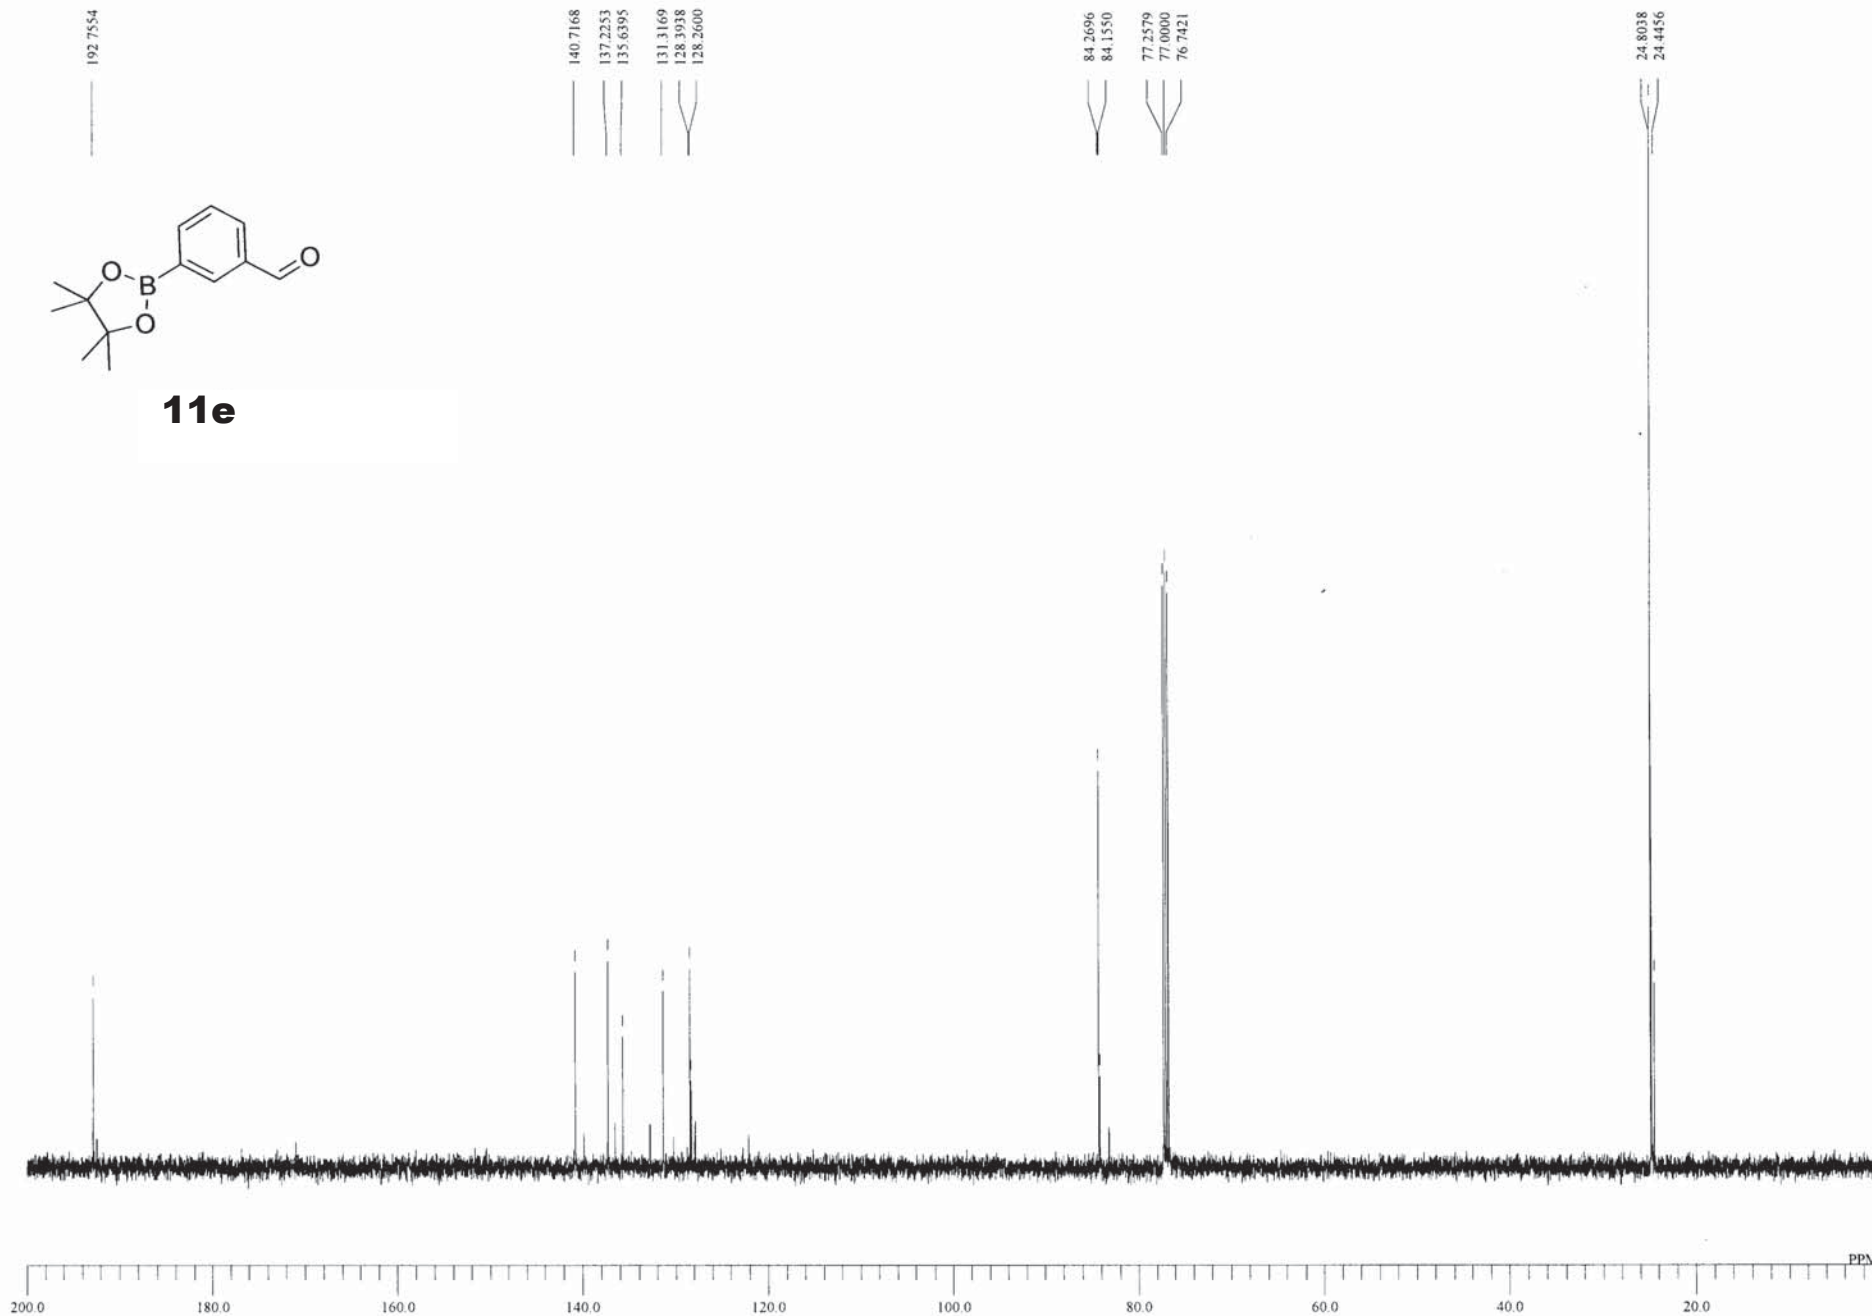

|       |                     |
|-------|---------------------|
| DATIM | 08-03-2011 12:28:35 |
| MENUF |                     |
| OBNUC | 13C                 |
| OFR   | 123.26 MHz          |
| OBSET | 2.31 KHz            |
| OBFIN | 6.71 Hz             |
| PW1   | 3.20 usec           |
| DEADT | 0.00 usec           |
| PREDL | 0.00000 msec        |
| IWT   | 1.0000 sec          |
| POINT | 52428               |
| SPO   | 52428               |
| TIMES | 16                  |
| DUMMY | 4                   |
| FREQU | 30863.73 Hz         |
| FLT   | 155000 Hz           |
| DELAY | 21.06 usec          |
| ACQTM | 0.8493 sec          |
| PD    | 10.0000 sec         |
| ADBIT | 16                  |
| RGAIN | 60                  |
| BF    | 1.00 Hz             |
| T1    | 0.00                |
| T2    | 0.00                |
| T3    | 90.00               |
| T4    | 100.00              |
| EXMOD | single_pulse_dec    |
| EXPCM |                     |
| IRNUC | 1H                  |
| IFR   | 490.15 MHz          |
| IRSET | 9.16 KHz            |
| IRFIN | 7.60 Hz             |
| IRRPW | 92 usec             |
| IRATN | 79                  |
| DFILE | KO-ATX-m-BPin-CHO-1 |
| SF    |                     |
| LKSET | 70.30 KHz           |
| LKFIN | 32.5 Hz             |
| LKLEV | 0                   |
| LGAIN | 0                   |
| LKPHS | 0                   |
| LKSIG | 0                   |
| CSPED | 0 Hz                |
| FILDC |                     |
| FILDF |                     |

C:\Documents and Settings\PC-USER\My Documents\Data\okura\ATX\ECX and ECA\als\KO-ATX-BPin-m-CH(ONB)2-1H.als

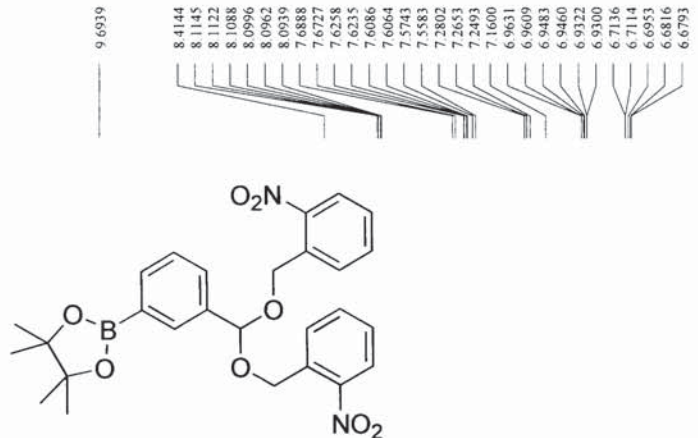

**6e**

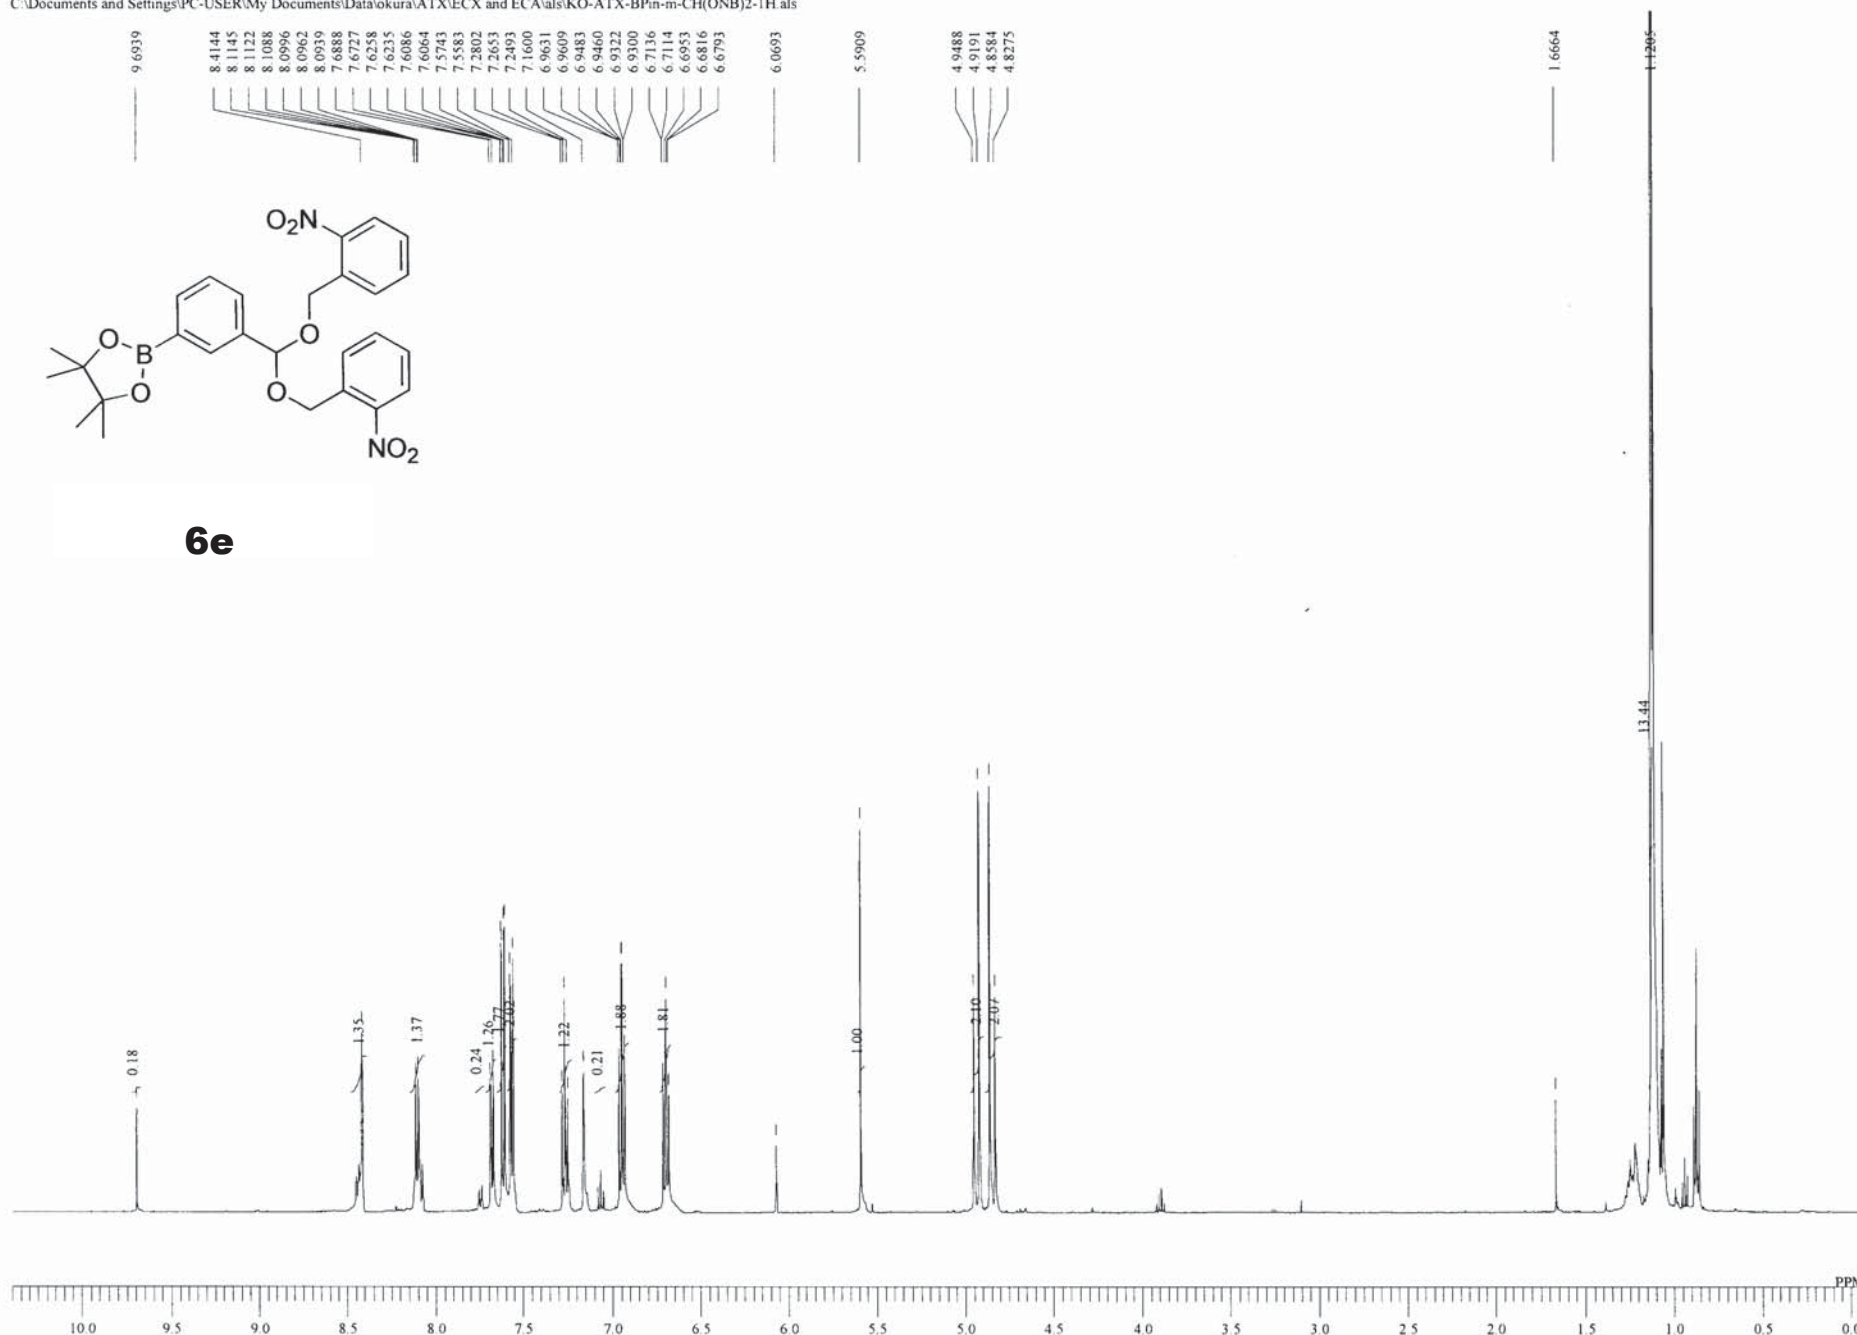

|       |                     |
|-------|---------------------|
| DATIM | 03-03-2011 23:37:13 |
| MENUP |                     |
| OBNUC | <sup>1</sup> H      |
| OFR   | 490.15 MHz          |
| OBSET | 9.16 KHz            |
| OBFIN | 7.60 Hz             |
| PWI   | 8.55 usec           |
| DEADT | 0.00 usec           |
| FREDL | 0.00000 msec        |
| IWT   | 1.0000 sec          |
| POINT | 13107               |
| SPO   | 13107               |
| TIMES | 8                   |
| DUMMY | 1                   |
| FREQU | 7352.83 Hz          |
| FLT   | 37000 Hz            |
| DELAY | 13.52 usec          |
| ACQTM | 1.7826 sec          |
| PD    | 1.5000 sec          |
| ADBIT | 16                  |
| RGAIN | 26                  |
| BF    | 0.01 Hz             |
| T1    | 0.00                |
| T2    | 0.00                |
| T3    | 90.00               |
| T4    | 100.00              |
| EXMOD | single_pulse.ex2    |
| EXPCM |                     |
| IRNUC | <sup>1</sup> H      |
| IFR   | 490.15 MHz          |
| IRSET | 9.16 KHz            |
| IRFIN | 7.60 Hz             |
| IRRPW | 118 usec            |
| IRATN | 79                  |
| DFILE | KO-ATX-BPin-m-CH(ON |
| SF    |                     |
| LKSET | 70.30 KHz           |
| LKFIN | 29.2 Hz             |
| LKLEV | 0                   |
| LGAIN | 0                   |
| LKPHS | 0                   |
| LKSIG | 0                   |
| CSPED | 0 Hz                |
| FILDC |                     |
| FILDF |                     |

C:\Documents and Settings\PC-USER\My Documents\Data\okura\ATX\ECX and ECA\als\KO-ATX-BPin-m-CH(ONB)2-13C.als

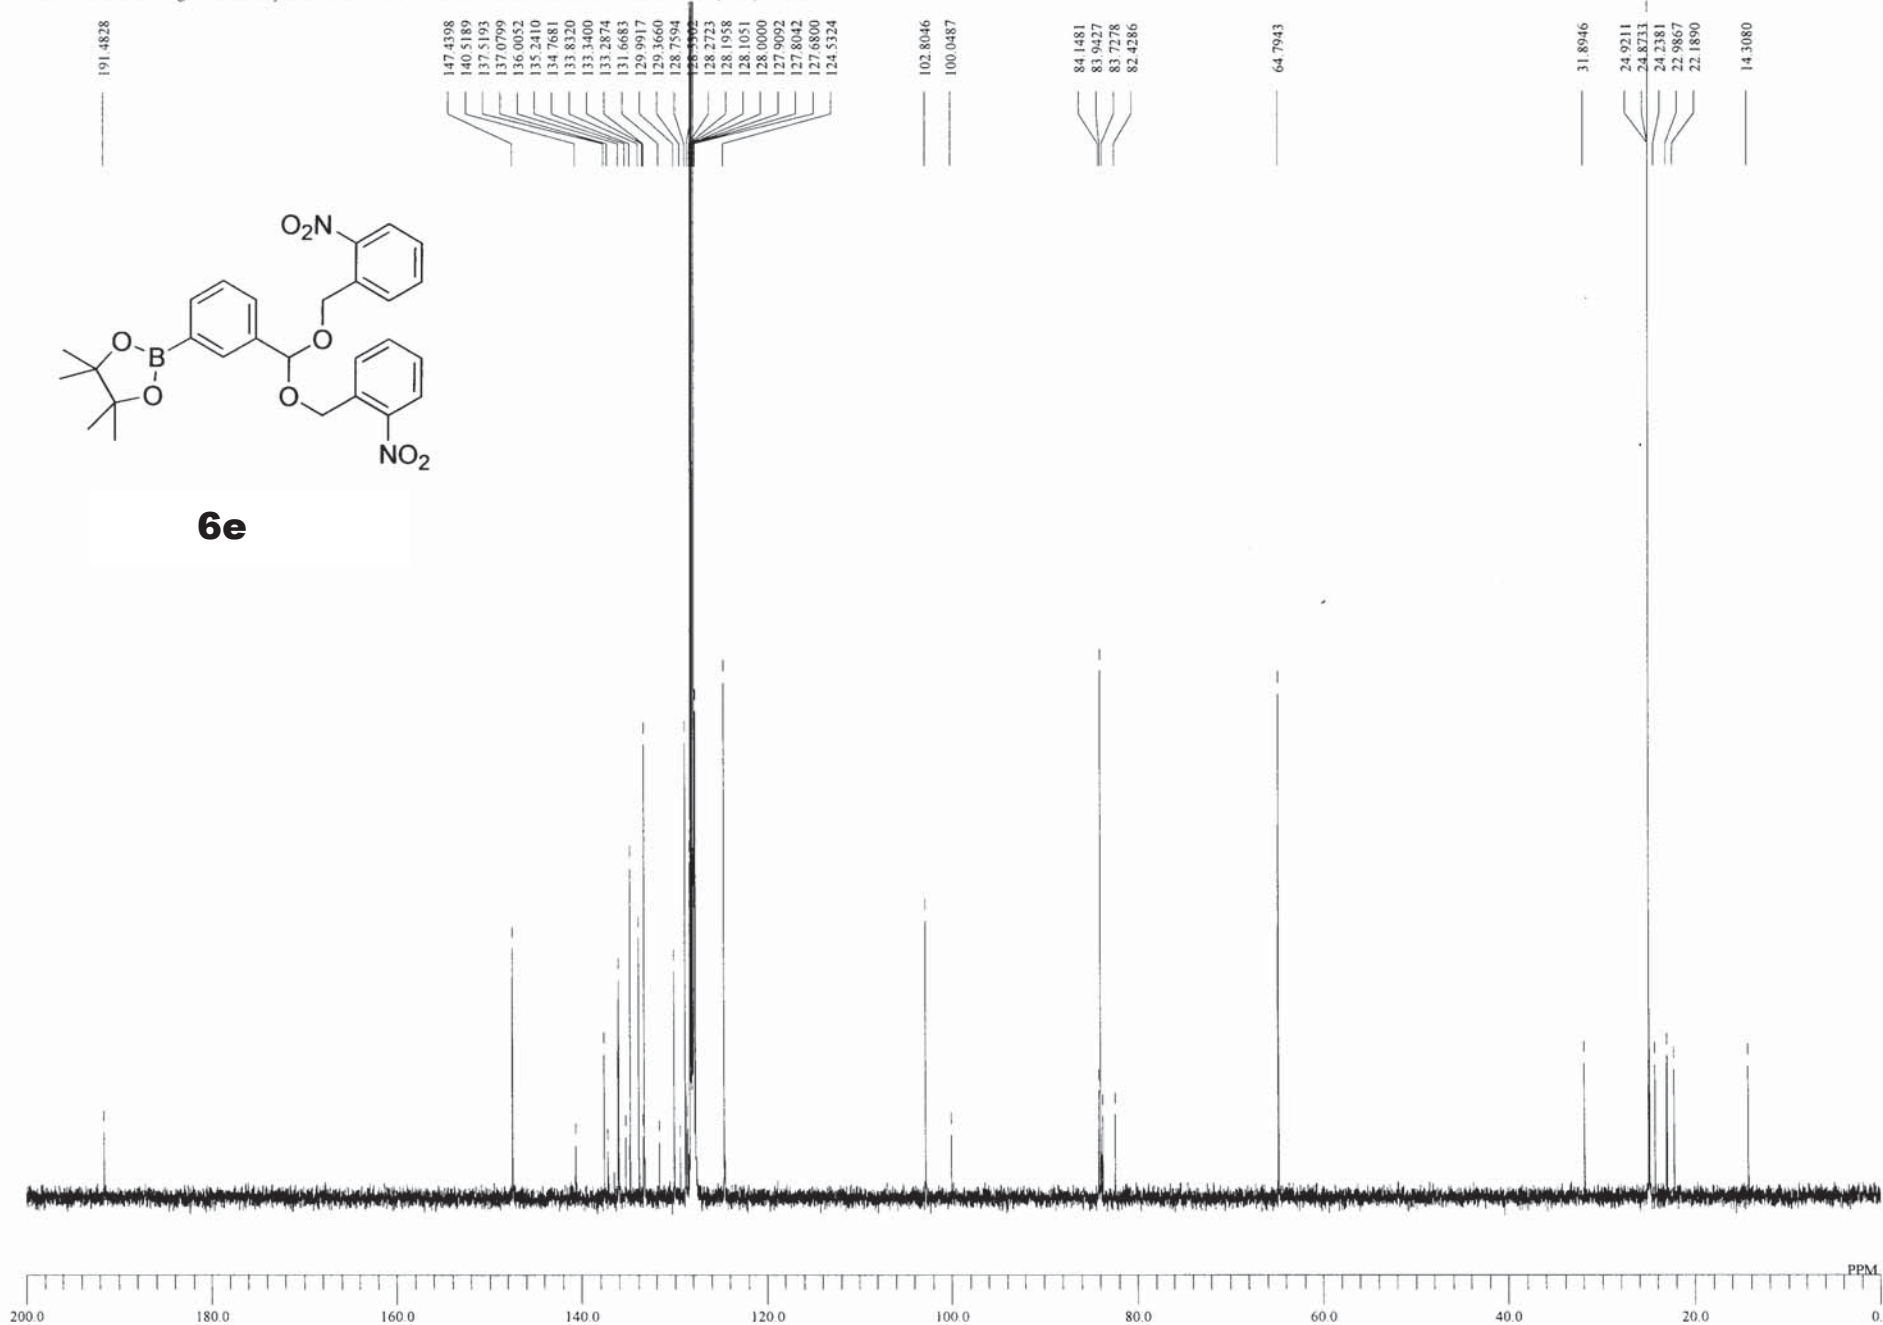

|       |                     |
|-------|---------------------|
| DATIM | 03-03-2011 23:43:50 |
| MENUF |                     |
| OBNUC | 13C                 |
| OFR   | 123.26 MHz          |
| OBSET | 2.31 KHz            |
| OBFIN | 6.71 Hz             |
| PW1   | 3.20 usec           |
| DEADT | 0.00 usec           |
| PREDL | 0.00000 msec        |
| IWT   | 1.0000 sec          |
| POINT | 52428               |
| SPO   | 52428               |
| TIMES | 32                  |
| DUMMY | 4                   |
| FREQU | 30863.73 Hz         |
| FLT   | 155000 Hz           |
| DELAY | 21.06 usec          |
| ACQTM | 0.8493 sec          |
| PD    | 10.0000 sec         |
| ADBIT | 16                  |
| RGAIN | 60                  |
| BF    | 1.00 Hz             |
| T1    | 0.00                |
| T2    | 0.00                |
| T3    | 90.00               |
| T4    | 100.00              |
| EXMOD | single_pulse_dec    |
| EXPCM |                     |
| IRNUC | 1H                  |
| IFR   | 490.15 MHz          |
| IRSET | 9.16 KHz            |
| IRFIN | 7.60 Hz             |
| IRRPW | 92 usec             |
| IRATN | 79                  |
| DFILE | KO-ATX-BPin-m-CH(ON |
| SF    |                     |
| LKSET | 70.30 KHz           |
| LKFIN | 29.2 Hz             |
| LKLEV | 0                   |
| LGAIN | 0                   |
| LKPHS | 0                   |
| LKSIG | 0                   |
| CSPED | 0 Hz                |
| FILDC |                     |
| FILDF |                     |

C:\Documents and Settings\PC-USER\My Documents\Data\okura\ATX\ECX and ECA\als\KO-ATX-BPin-p-CH(ONB)2-1H.als

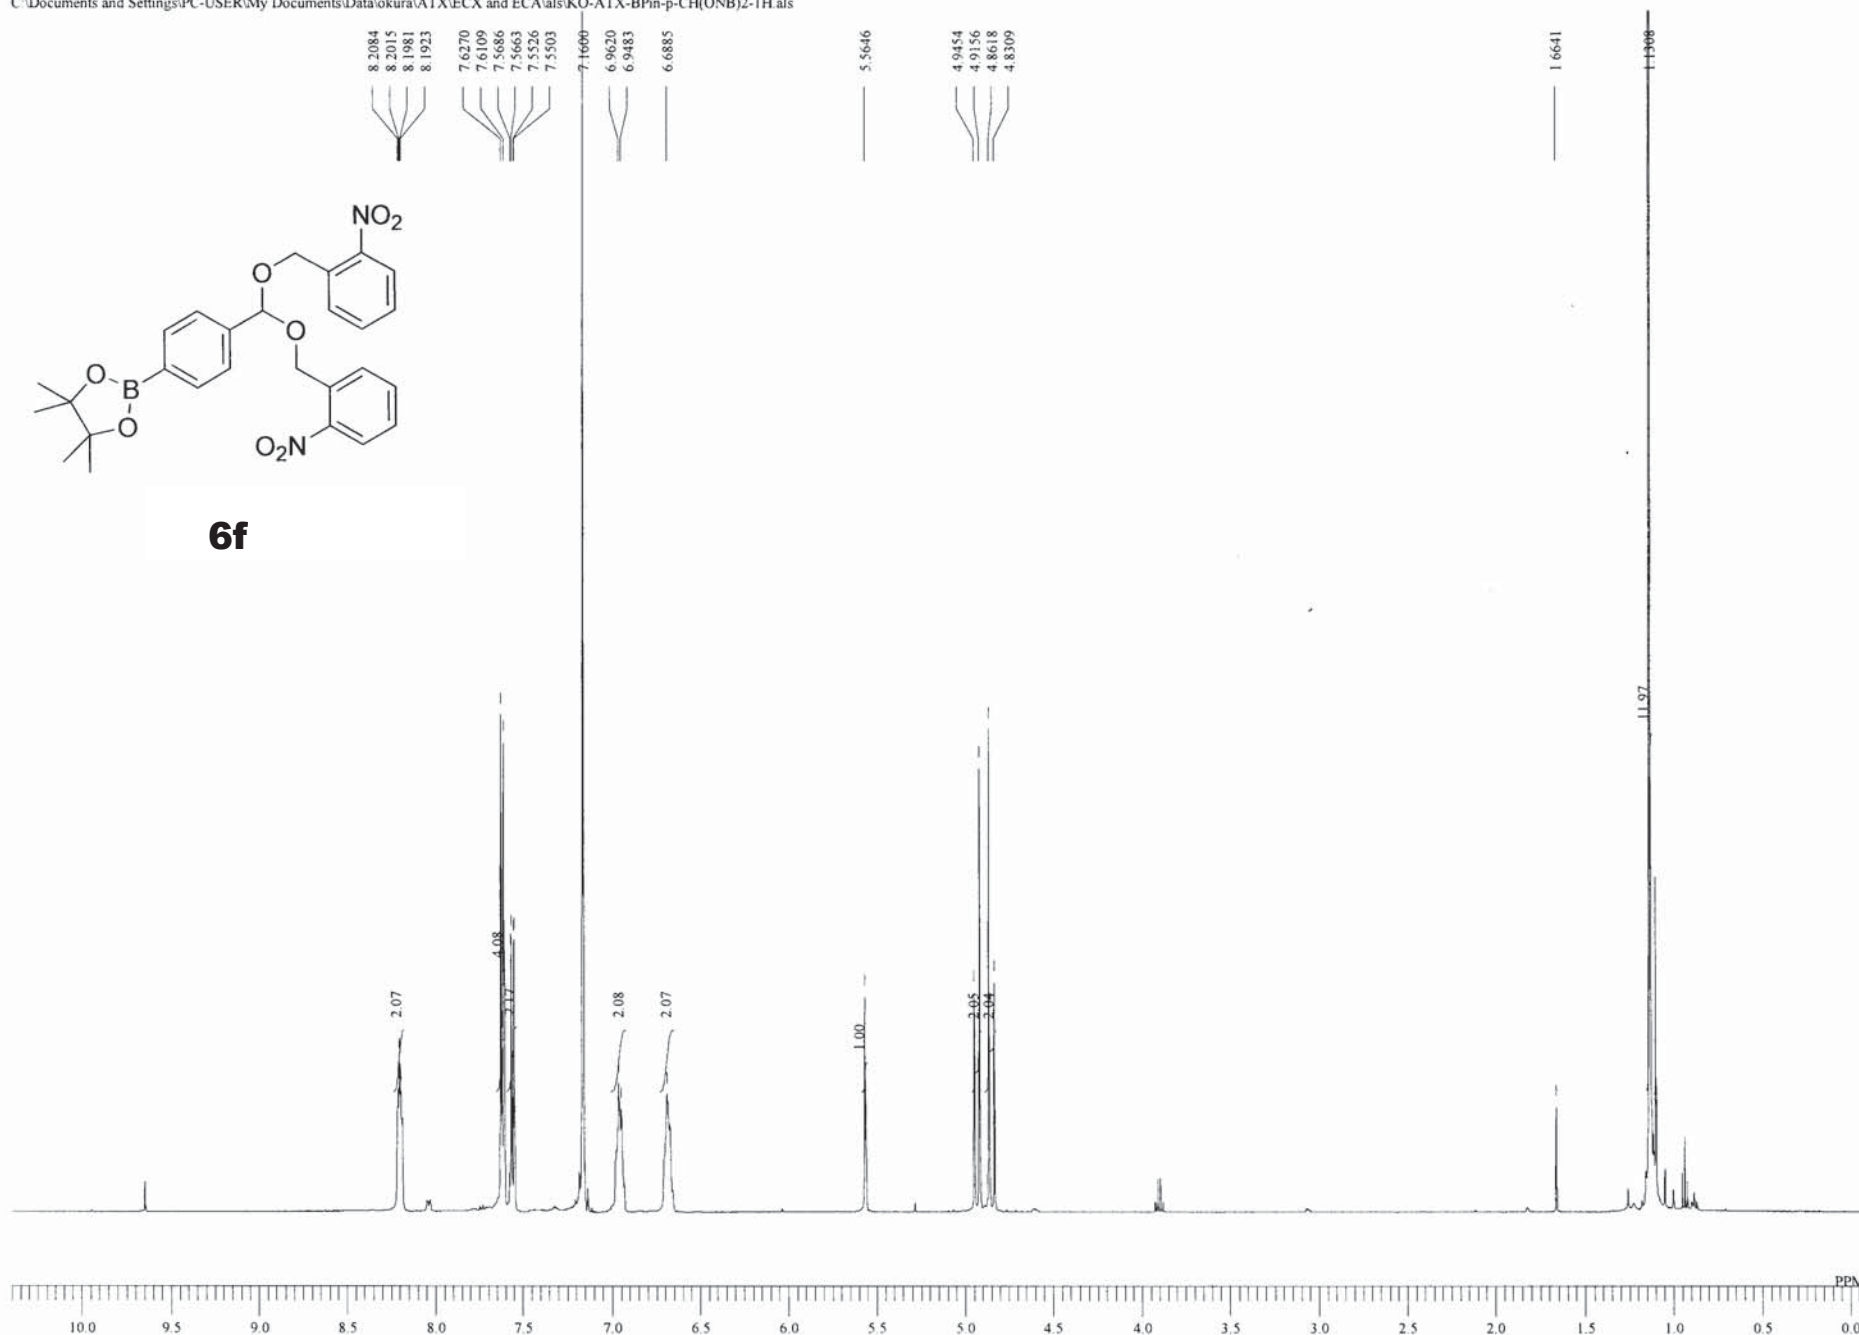

|       |                     |
|-------|---------------------|
| DATIM | 04-03-2011 17:47:29 |
| MENUF |                     |
| OBRUC | 1H                  |
| OFR   | 490.15 MHz          |
| OBSET | 9.16 KHz            |
| OBFIN | 7.60 Hz             |
| PW1   | 8.55 usec           |
| DEADT | 0.00 usec           |
| PREDL | 0.00000 msec        |
| IWT   | 1.0000 sec          |
| POINT | 13107               |
| SPO   | 13107               |
| TIMES | 8                   |
| DUMMY | 1                   |
| FREQU | 7352.83 Hz          |
| FLT   | 37000 Hz            |
| DELAY | 13.52 usec          |
| ACQTM | 1.7826 sec          |
| PD    | 5.0000 sec          |
| ADBIT | 16                  |
| RGAIN | 26                  |
| BF    | 0.01 Hz             |
| T1    | 0.00                |
| T2    | 0.00                |
| T3    | 90.00               |
| T4    | 100.00              |
| EXMOD | single_pulse ex2    |
| EXPCM |                     |
| IRNUC | 1H                  |
| IFR   | 490.15 MHz          |
| IRSET | 9.16 KHz            |
| IRFIN | 7.60 Hz             |
| IRRPW | 118 usec            |
| IRATN | 79                  |
| DFILE | KO-ATX-BPin-p-CH(ON |
| SF    |                     |
| LKSET | 70.30 KHz           |
| LKFIN | 29.2 Hz             |
| LKLEV | 0                   |
| LGAIN | 0                   |
| LKPHS | 0                   |
| LKSIG | 0                   |
| CSPED | 0 Hz                |
| FILDC |                     |
| FILDF |                     |

C:\Documents and Settings\PC-USER\My Documents\Data\okura\ATX\ECX and ECA\als\KO-ATX-BPin-p-CH(ONB)2-13C.als

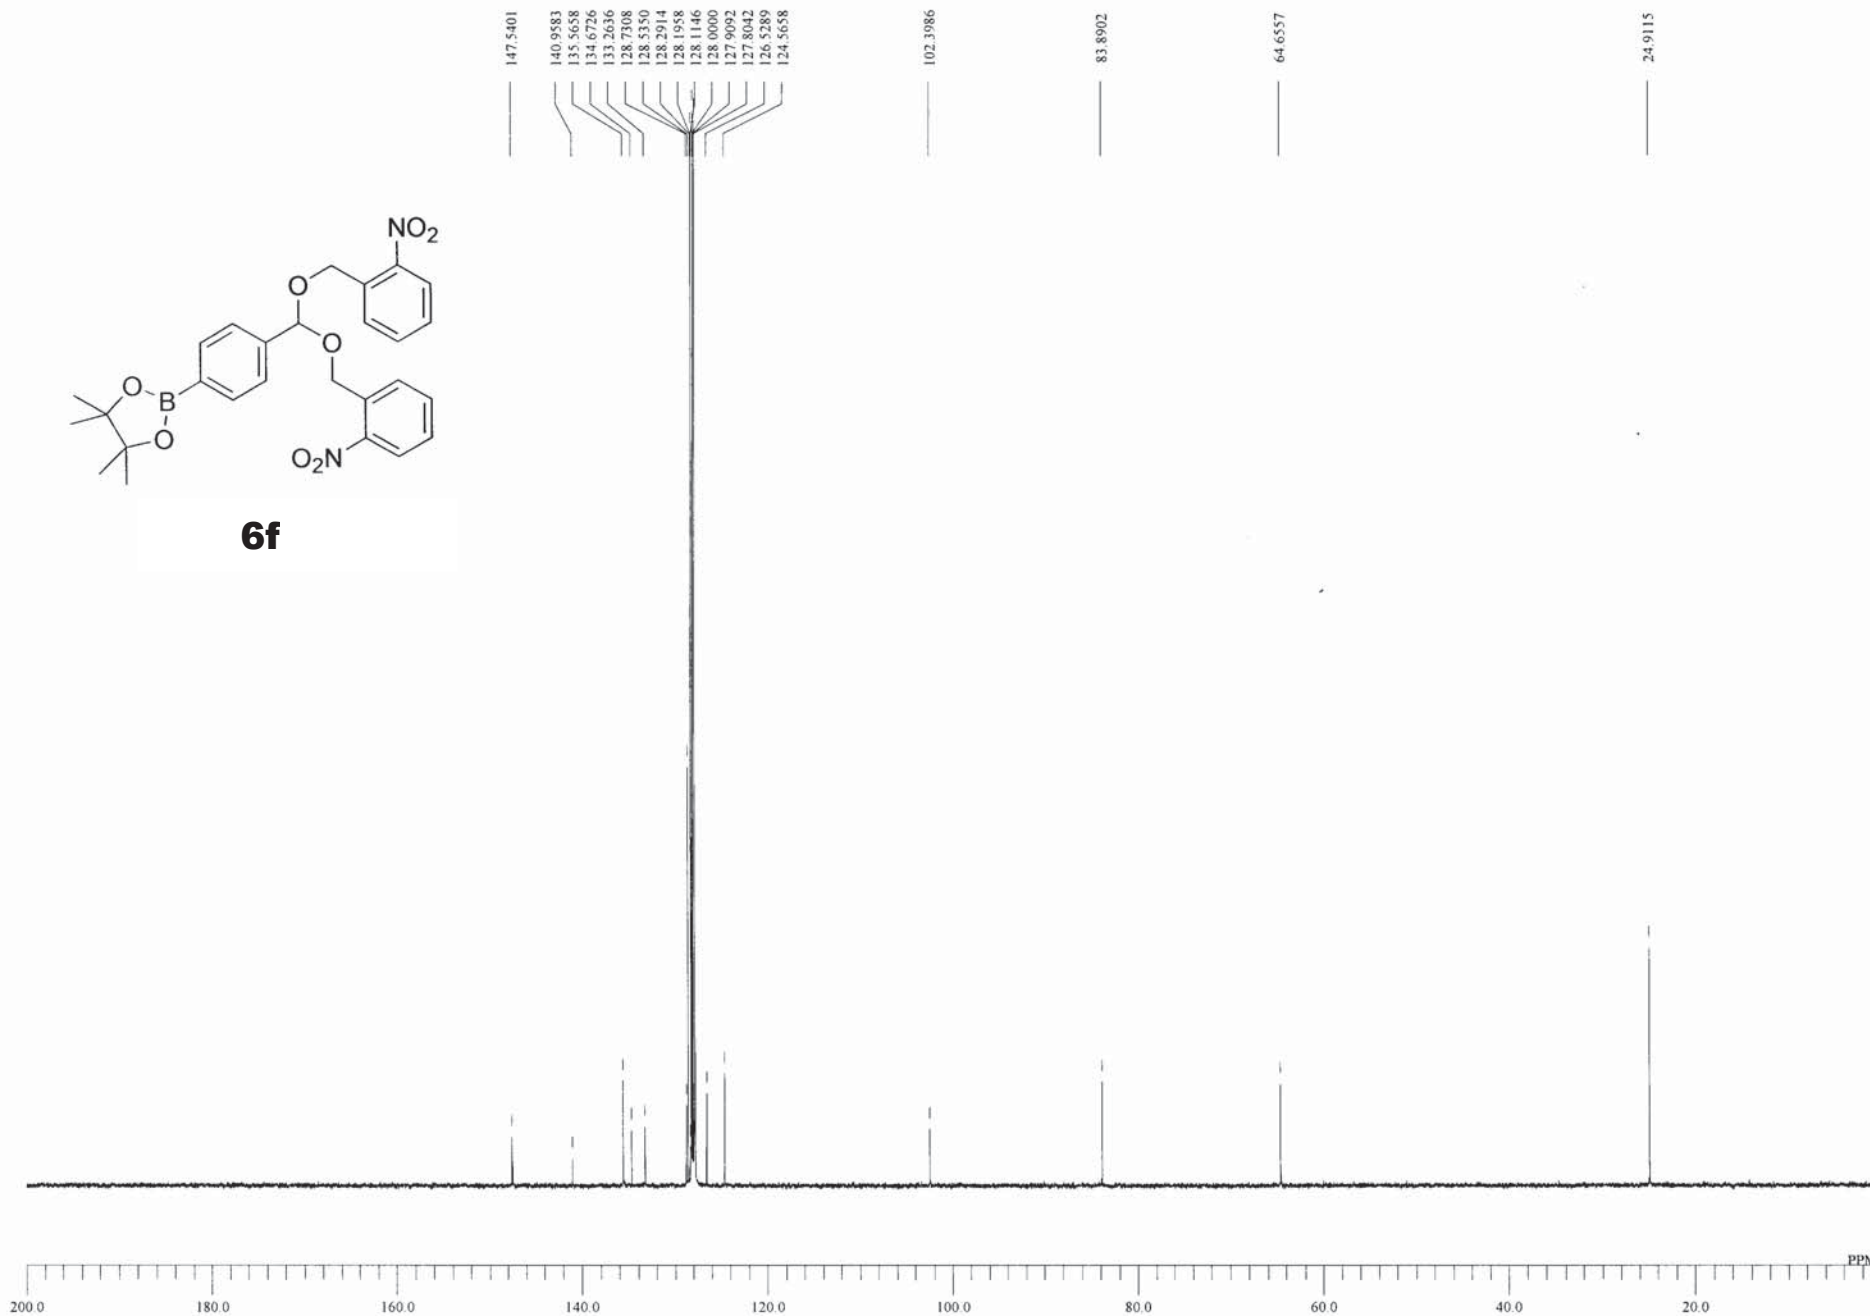

|       |                     |
|-------|---------------------|
| DATIM | 04-03-2011 17:54:06 |
| MENUF |                     |
| OBNUC | 13C                 |
| OFR   | 123.26 MHz          |
| OBSET | 2.31 KHz            |
| OBFIN | 6.71 Hz             |
| PW1   | 3.20 usec           |
| DEADT | 0.00 usec           |
| PREDL | 0.00000 msec        |
| IWT   | 1.0000 sec          |
| POINT | 52428               |
| SPO   | 52428               |
| TIMES | 32                  |
| DUMMY | 4                   |
| FREQU | 30863.73 Hz         |
| FLT   | 155000 Hz           |
| DELAY | 21.06 usec          |
| ACQTM | 0.8493 sec          |
| PD    | 10.0000 sec         |
| ADBIT | 16                  |
| RGAIN | 60                  |
| BF    | 1.00 Hz             |
| T1    | 0.00                |
| T2    | 0.00                |
| T3    | 90.00               |
| T4    | 100.00              |
| EXMOD | single_pulse_dec    |
| EXPCM |                     |
| IRNUC | 1H                  |
| IFR   | 490.15 MHz          |
| IRSET | 9.16 KHz            |
| IRFIN | 7.60 Hz             |
| IRRPW | 92 usec             |
| IRATN | 79                  |
| DFILE | KO-ATX-BPin-p-CH(ON |
| SF    |                     |
| LKSET | 70.30 KHz           |
| LKFIN | 29.2 Hz             |
| LKLEV | 0                   |
| LGAIN | 0                   |
| LKPHS | 0                   |
| LKSIG | 0                   |
| CSPED | 0 Hz                |
| FILDC |                     |
| FILDF |                     |

C:\Documents and Settings\PC-USER\My Documents\Data\okura\ATX\ECX and ECA\als\KO-ATX-o-PhONB-1H.als

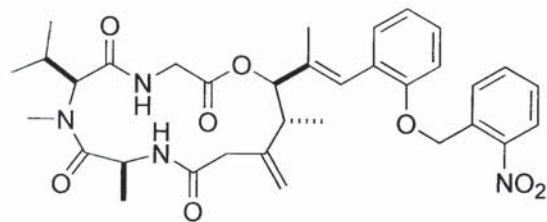

**2a**

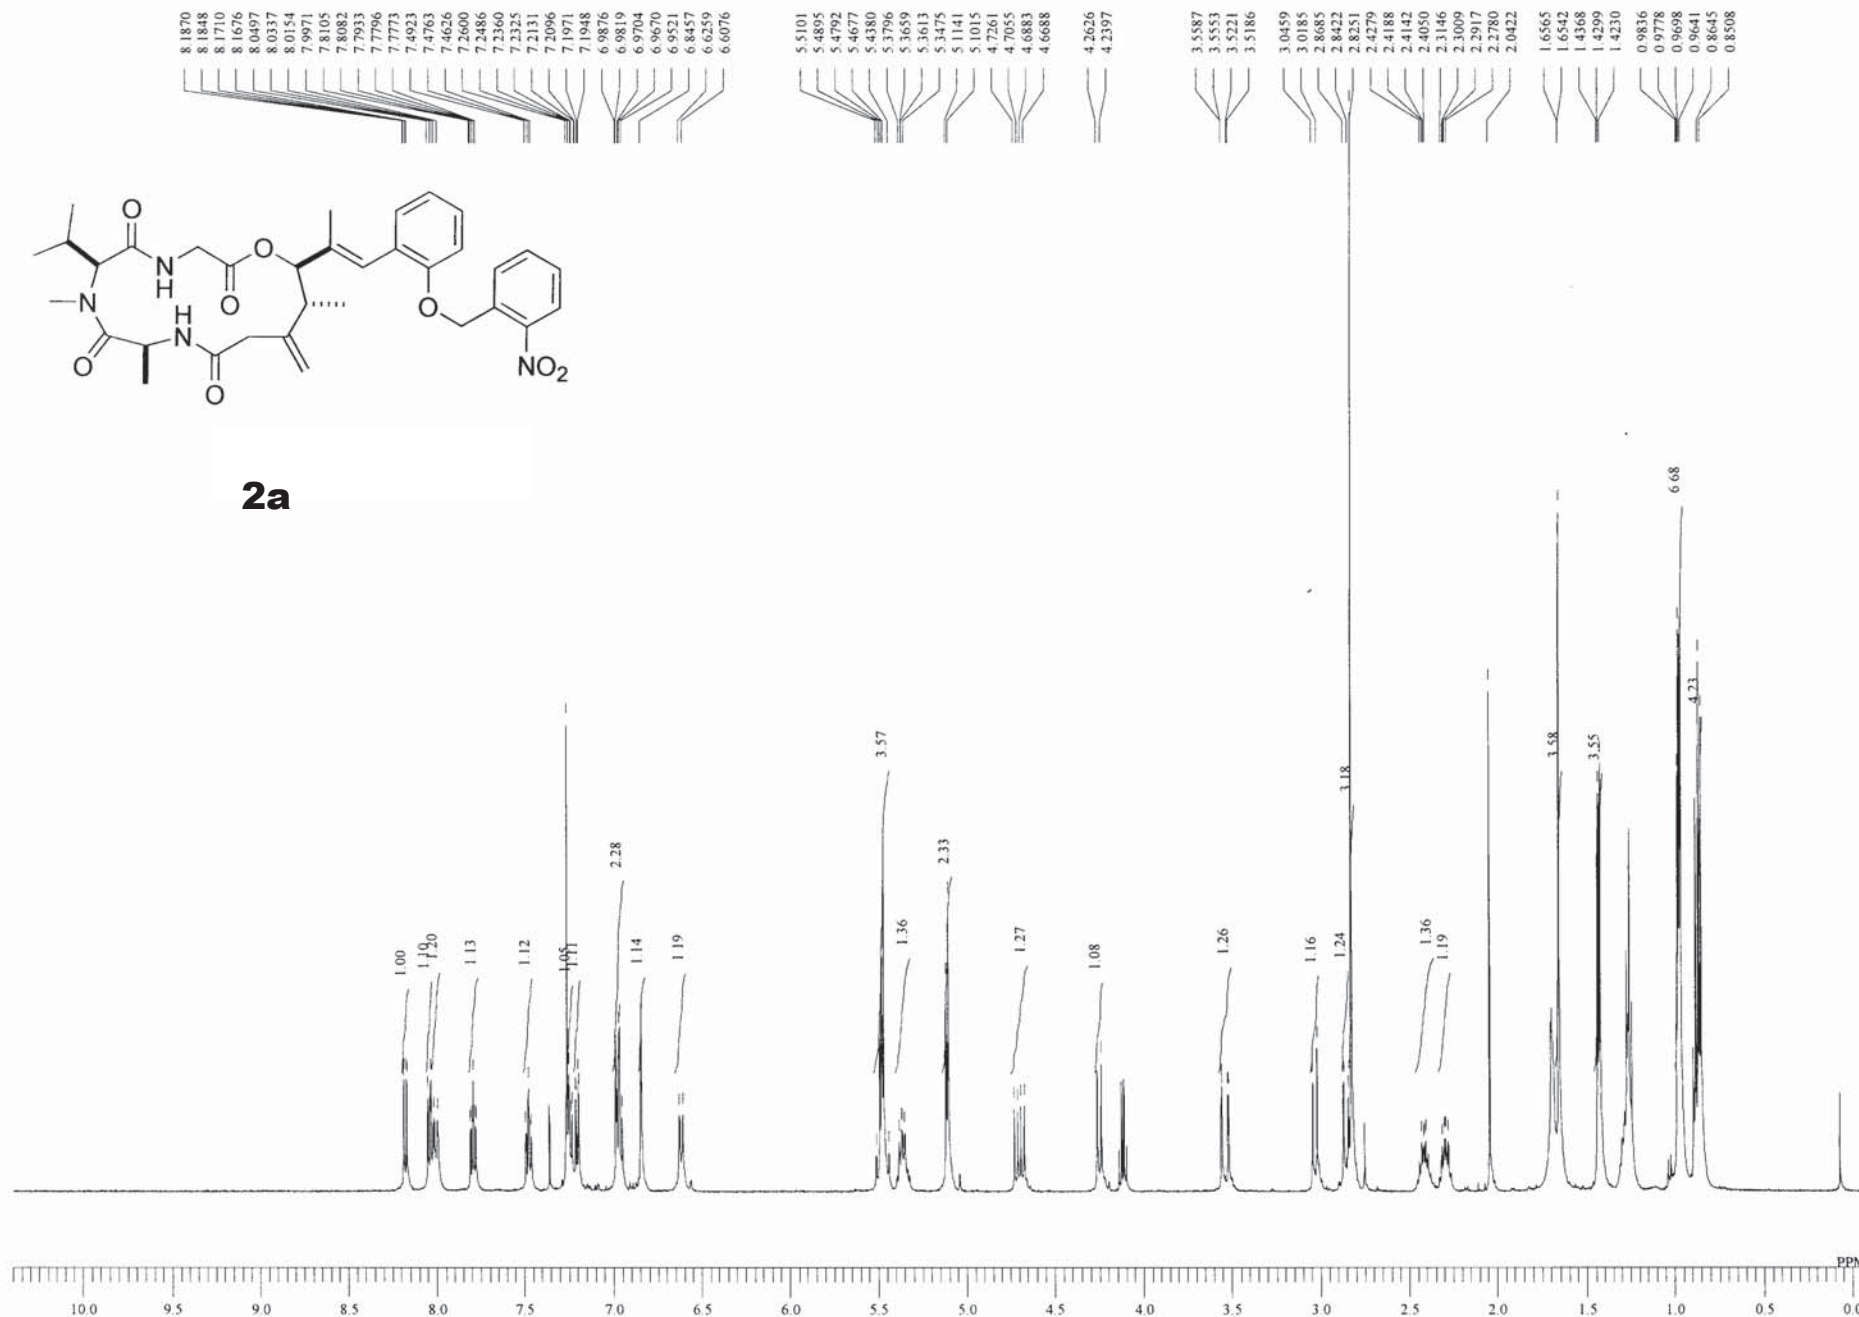

DATIM 18-09-2010 15:59:07  
 MENUF 1H  
 OBNUC 1H  
 OFR 490.15 MHz  
 OBSET 9.16 KHz  
 OBFIN 7.60 Hz  
 PWI 8.55 usec  
 DEADT 0.00 usec  
 PREDL 0.00000 msec  
 IWT 1.0000 sec  
 POINT 13107  
 SPO 13107  
 TIMES 8  
 DUMMY 1  
 FREQU 7352.83 Hz  
 FLT 37000 Hz  
 DELAY 13.52 usec  
 ACQTM 1.7826 sec  
 PD 1.5000 sec  
 ADBIT 16  
 RGAIN 40  
 BF 0.01 Hz  
 T1 0.00  
 T2 0.00  
 T3 90.00  
 T4 100.00  
 EXMOD single\_pulse.ex2  
 EXPCM 1H  
 IRNUC 1H  
 IFR 490.15 MHz  
 IRSET 9.16 KHz  
 IRFIN 7.60 Hz  
 IRRPW 118 usec  
 IRATN 79  
 DFILE KO-ATX-o-PhONB-1H.al  
 SF 70.30 KHz  
 LKSET 32.5 Hz  
 LKFIN 0  
 LKLEV 0  
 LGAIN 0  
 LKPHS 0  
 LKSIG 0  
 CSPED 0 Hz  
 FILDC  
 FILDF

C:\Documents and Settings\PC-USER\My Documents\Data\okura\ATX\ECX and ECA\als\KO-ATX-o-PhONB-13C.als

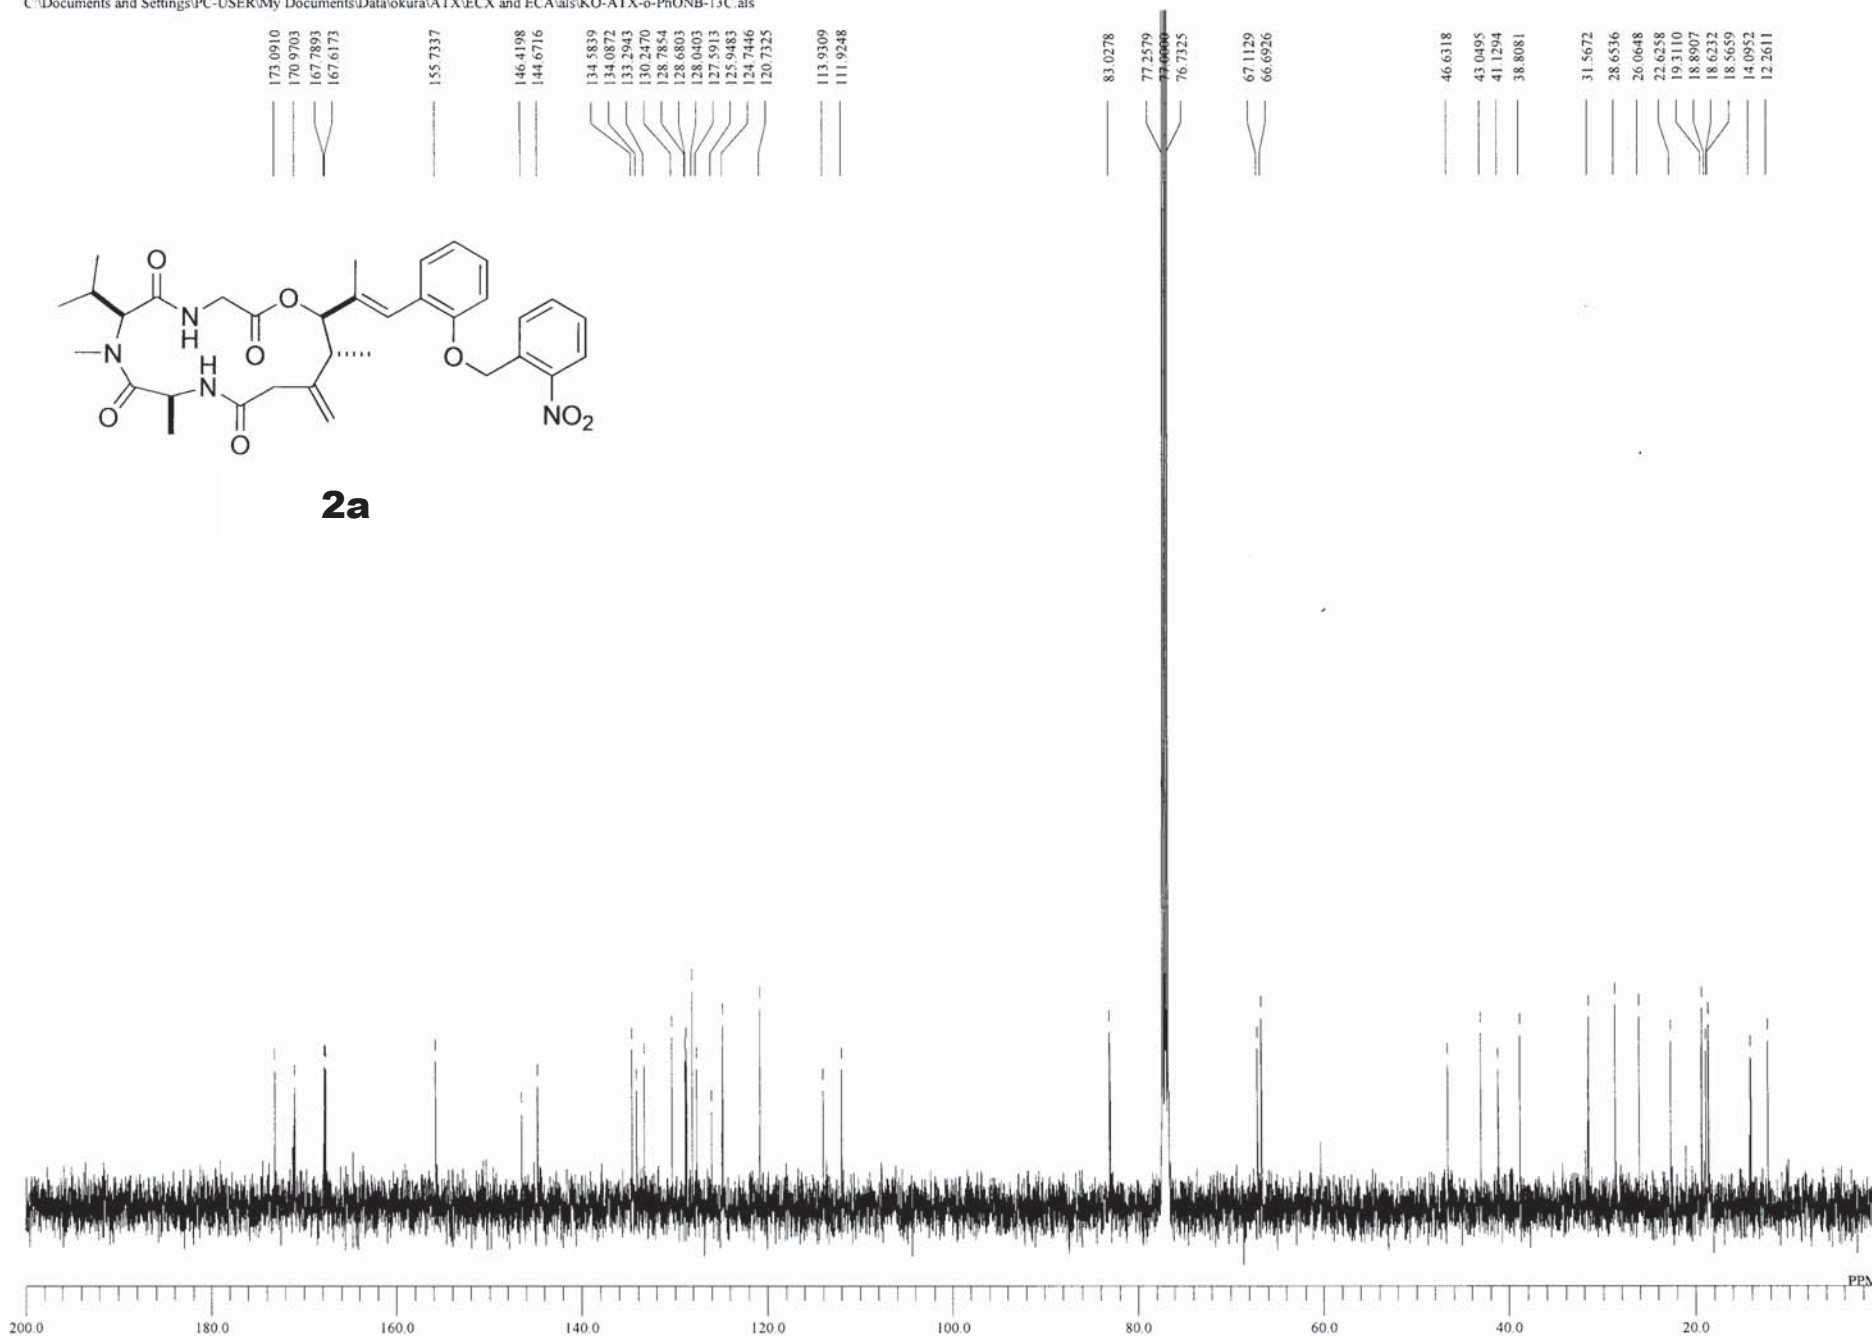

DATIM 18-09-2010 17:32:30  
MENUF  
OBNUC 13C  
OFR 123.26 MHz  
OBSET 2.31 KHz  
OBFIN 6.71 Hz  
PW1 3.20 usec  
DEADT 0.00 usec  
PREDL 0.00000 msec  
IWT 1.0000 sec  
POINT 26214  
SPO 26214  
TIMES 512  
DUMMY 4  
FREQU 30863.73 Hz  
FLT 155000 Hz  
DELAY 21.06 usec  
ACQTM 0.8493 sec  
PD 10.0000 sec  
ADBIT 16  
RGAIN 60  
BF 1.00 Hz  
T1 0.00  
T2 0.00  
T3 90.00  
T4 100.00  
EXMOD single\_pulse\_dec  
EXPCM  
IRNUC 1H  
IFR 490.15 MHz  
IRSET 9.16 KHz  
IRFIN 7.60 Hz  
IRRPW 92 usec  
IRATN 79  
DFILE KO-ATX-o-PhONB-13C.i  
SF  
LKSET 70.30 KHz  
LKFIN 32.5 Hz  
LKLEV 0  
LGAIN 0  
LKPHS 0  
LKSIG 0  
CSPED 0 Hz  
FILDC  
FILDF

C:\Documents and Settings\PC-USER\My Documents\Data\okura\ATX\ECX and ECA\als\KO-ATX-m-PhONB-1H.als

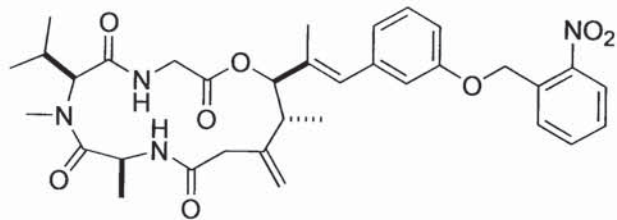

**2b**

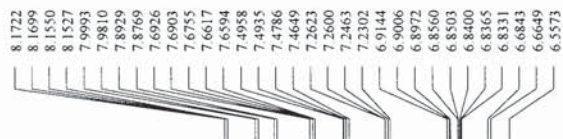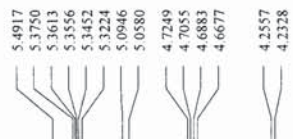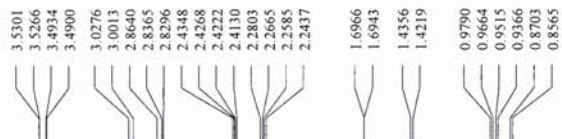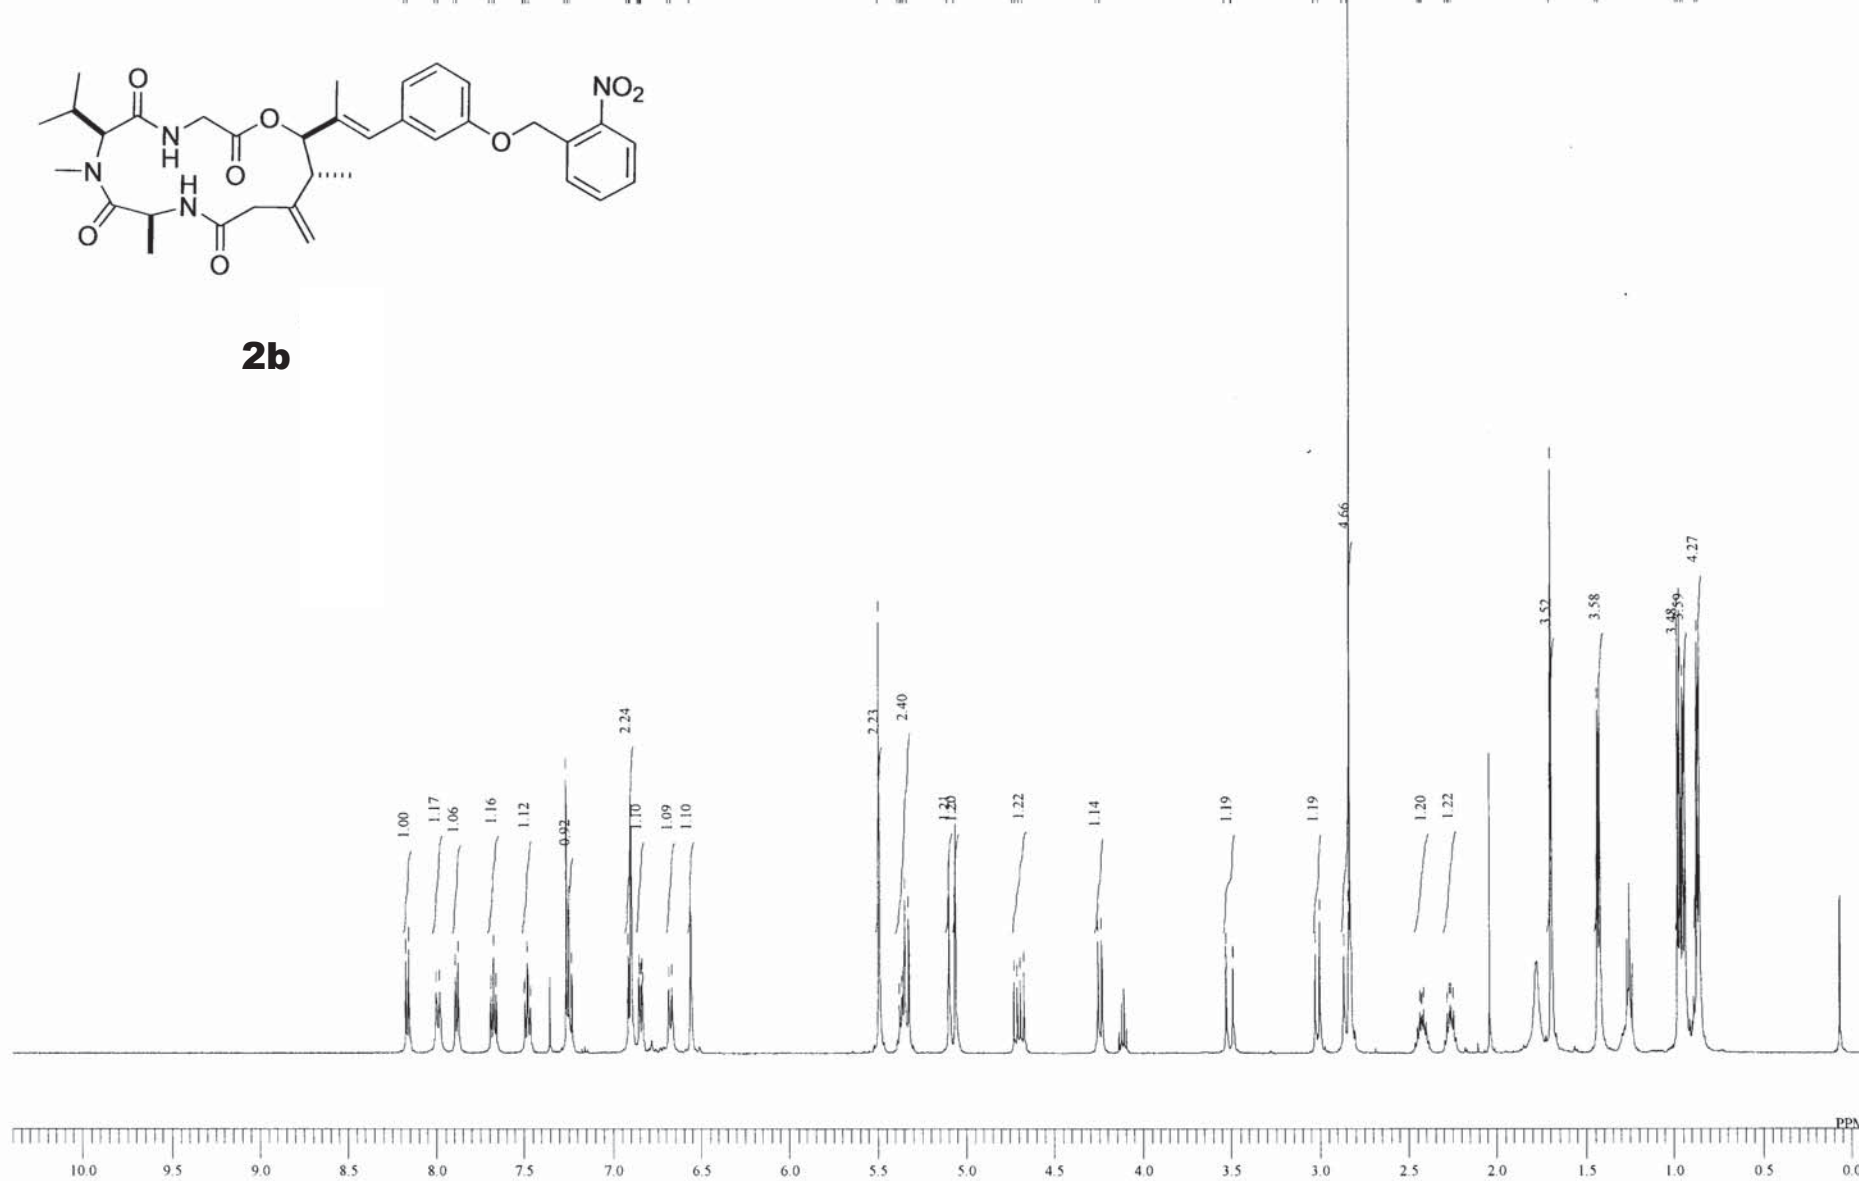

DATIM 18-09-2010 13:16:42  
 MENUF 1H  
 OBNUC 1H  
 OFR 490.15 MHz  
 OBSET 9.16 KHz  
 OFBIN 7.60 Hz  
 PW1 8.55 usec  
 DEADT 0.00 usec  
 PREDL 0.00000 msec  
 IWT 1.0000 sec  
 POINT 13107  
 SPO 13107  
 TIMES 8  
 DUMMY 1  
 FREQU 7352.83 Hz  
 FLT 37000 Hz  
 DELAY 13.52 usec  
 ACQTM 1.7826 sec  
 PD 1.5000 sec  
 ADBIT 16  
 RGAIN 40  
 BF 0.01 Hz  
 T1 0.00  
 T2 0.00  
 T3 90.00  
 T4 100.00  
 EXMOD single\_pulse ex2  
 EXPCM 1H  
 IRNUC 490.15 MHz  
 IRSET 9.16 KHz  
 IRFIN 7.60 Hz  
 IRRPW 118 usec  
 IRATN 79  
 DFILE KO-ATX-m-PhONB-1H.a  
 SF 70.30 KHz  
 LKSET 32.5 Hz  
 LKFIN 0  
 LKLEV 0  
 LGAIN 0  
 LKPHS 0  
 LKSIG 0  
 CSPED 0 Hz  
 FILDC  
 FILDF



C:\Documents and Settings\PC-USER\My Documents\Data\okura\ATX\ECX and ECA\als\KO-ATX-m-PhONB-13C.als

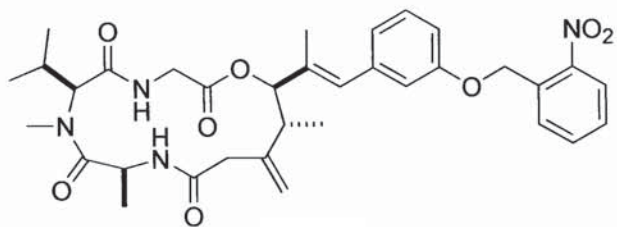

**2b**

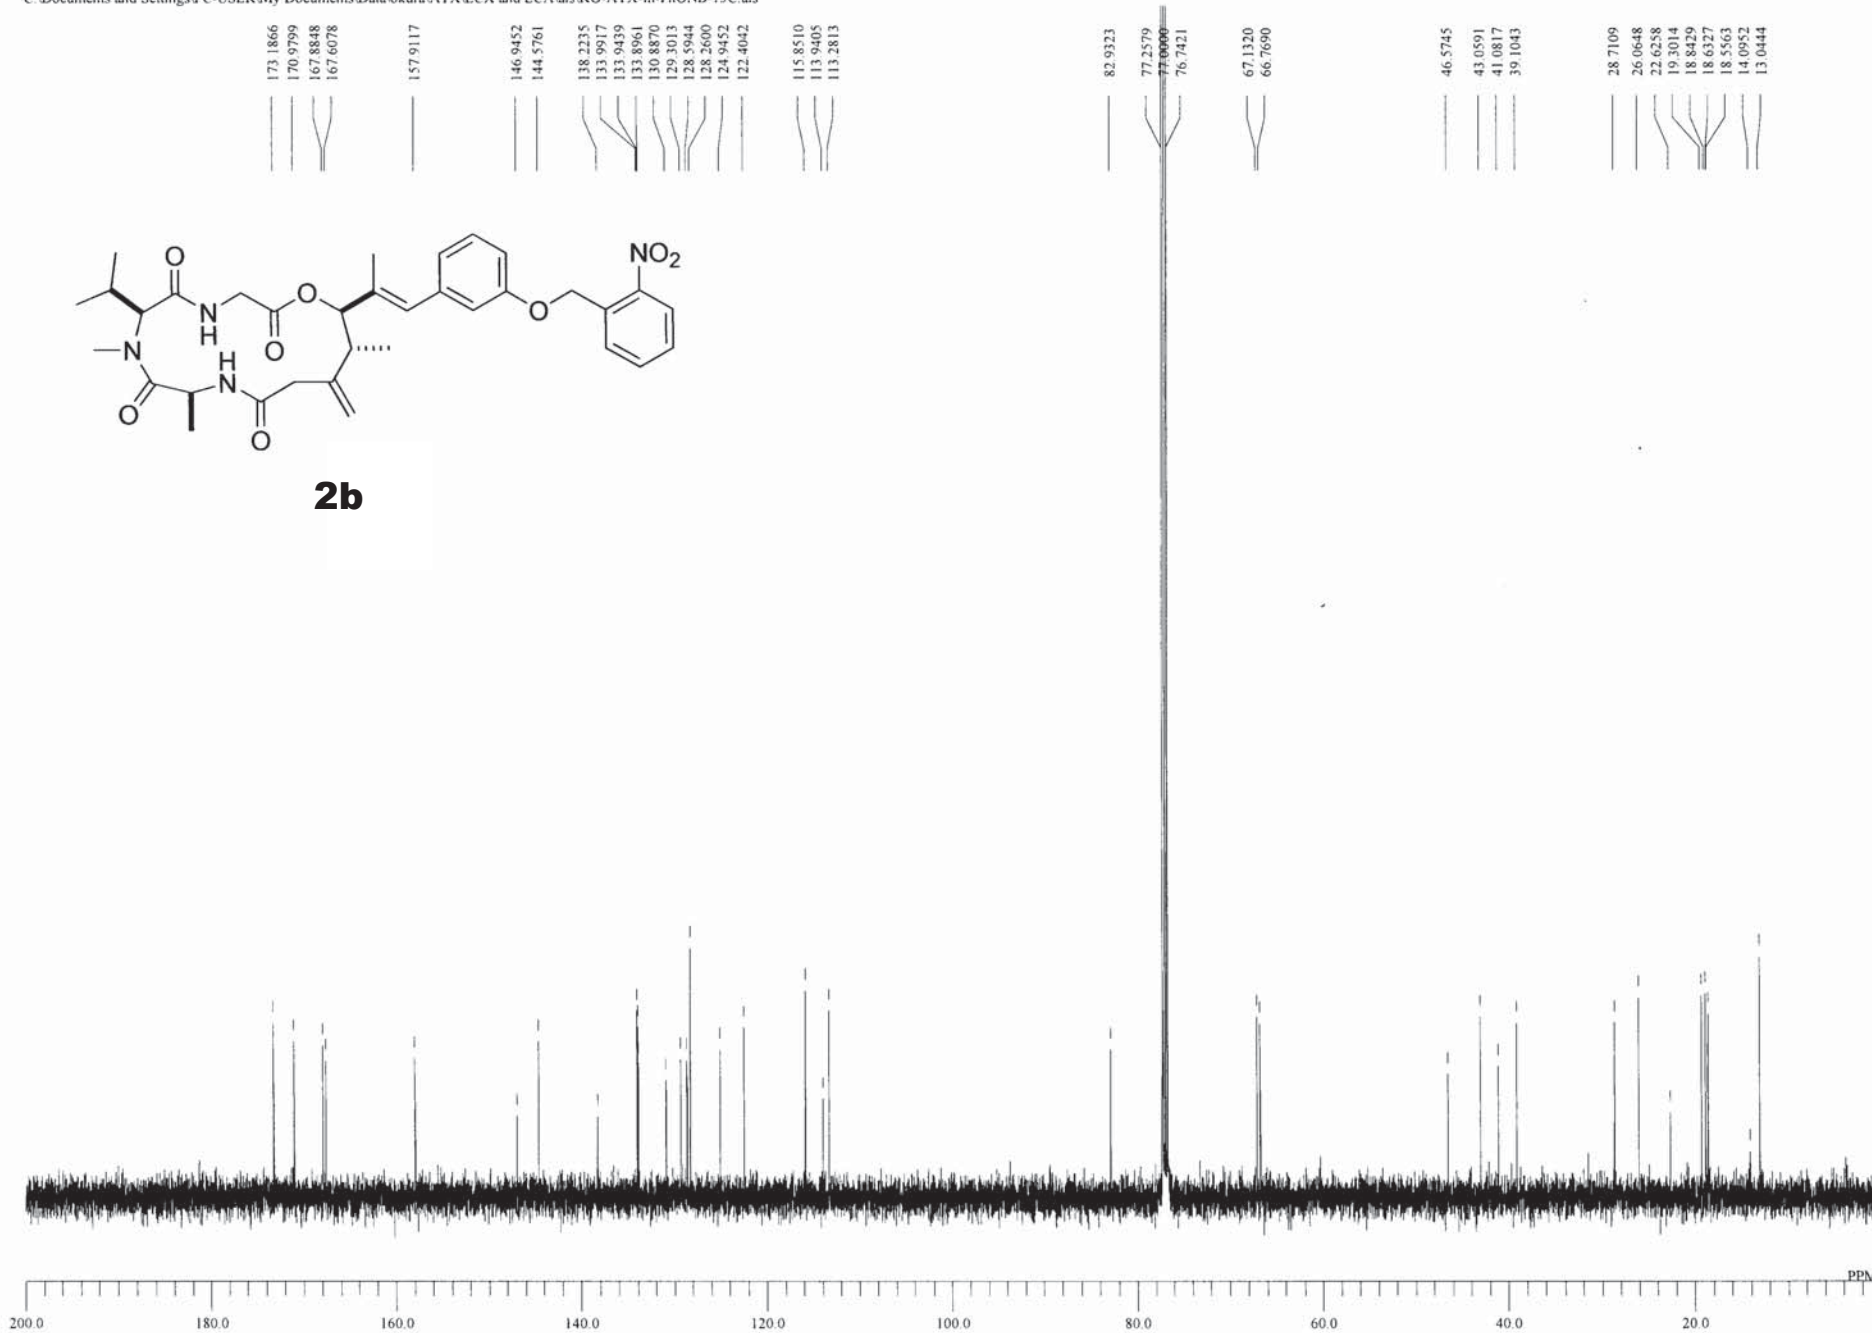

DATIM 18-09-2010 14:50:05  
 MENUF  
 OBNUC 13C  
 OFR 123.26 MHz  
 OBSET 2.31 KHz  
 OFBIN 6.71 Hz  
 PW1 3.20 usec  
 DEADT 0.00 usec  
 PREDL 0.00000 msec  
 IWT 1.0000 sec  
 POINT 26214  
 SPO 26214  
 TIMES 512  
 DUMMY 4  
 FREQU 30863.73 Hz  
 FLT 155000 Hz  
 DELAY 21.06 usec  
 ACQTM 0.8493 sec  
 PD 10.0000 sec  
 ADBIT 16  
 RGAIN 60  
 BF 0.10 Hz  
 T1 0.00  
 T2 0.00  
 T3 90.00  
 T4 100.00  
 EXMOD single\_pulse\_dec  
 EXPCM  
 IRNUC 1H  
 IFR 490.15 MHz  
 IRSET 9.16 KHz  
 IRFIN 7.60 Hz  
 IRRPW 92 usec  
 IRATN 79  
 DFILE KO-ATX-m-PhONB-13C  
 SF  
 LKSET 70.30 KHz  
 LKFIN 32.5 Hz  
 LKLEV 0  
 LGAIN 0  
 LKPHS 0  
 LKSIG 0  
 CSPED 0 Hz  
 FILDC  
 FILDF

C:\Documents and Settings\PC-USER\My Documents\Data\okura\ATX\ECX and ECA\als\KO-ATX-p-PhONB-1H.als

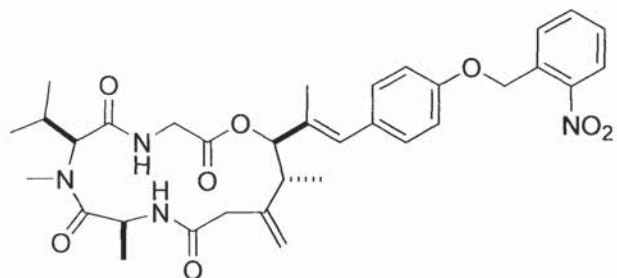

**2c**

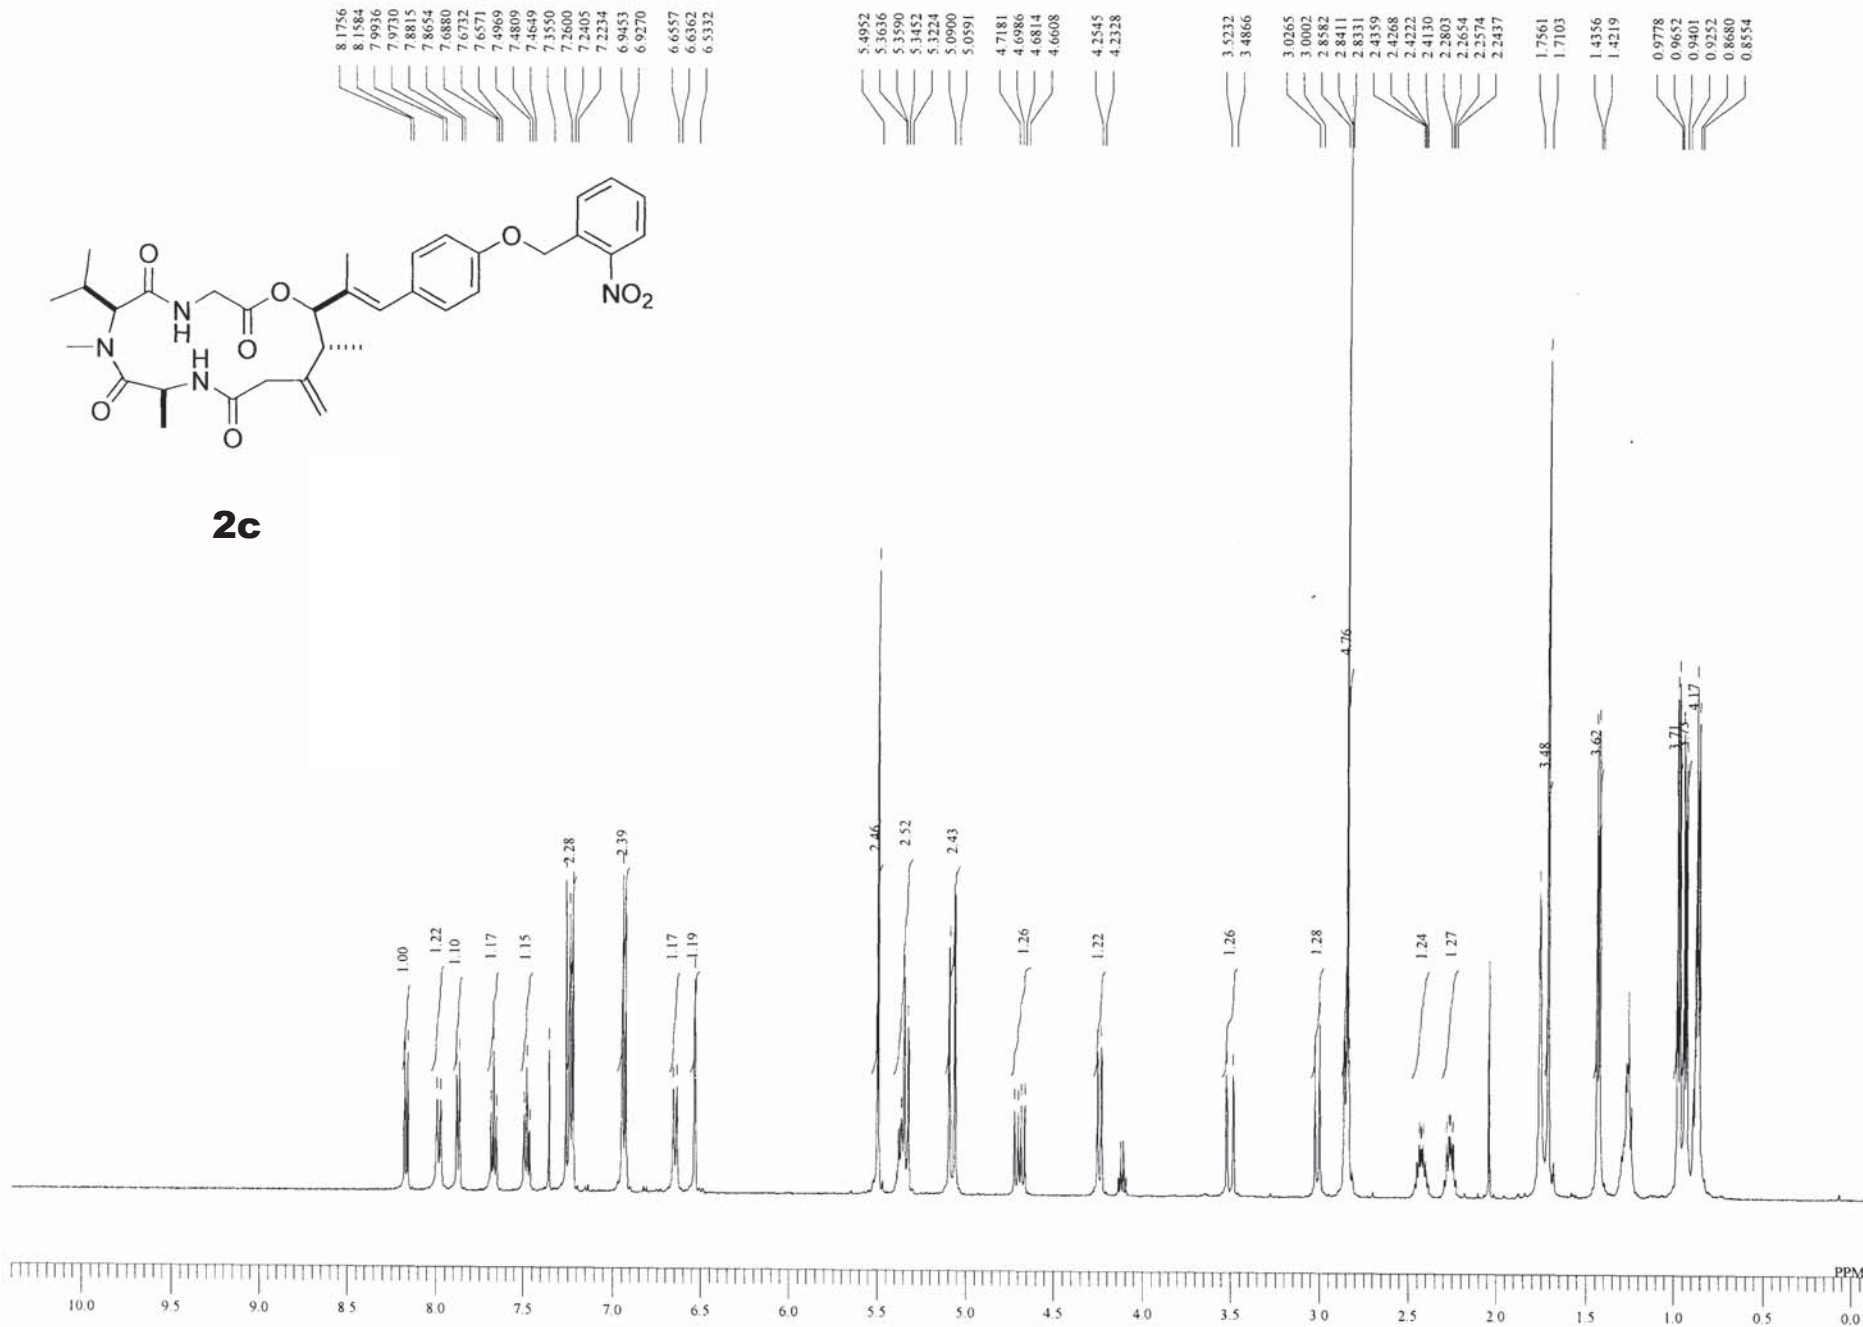

DATIM 18-09-2010 07:33:47  
 MENUF 1H  
 OBNUC 1H  
 OFR 490.15 MHz  
 OBSET 9.16 KHz  
 OBFIN 7.60 Hz  
 PW1 8.55 usec  
 DEADT 0.00 usec  
 PREDL 0.00000 msec  
 IWT 1.0000 sec  
 POINT 13107  
 SPO 13107  
 TIMES 8  
 DUMMY 1  
 FREQU 7352.83 Hz  
 FLT 37000 Hz  
 DELAY 13.52 usec  
 ACQTM 1.7826 sec  
 PD 1.5000 sec  
 ADBIT 16  
 RGAIN 40  
 BF 0.01 Hz  
 T1 0.00  
 T2 0.00  
 T3 90.00  
 T4 100.00  
 EXMOD single\_pulse.ex2  
 EXPCM 1H  
 IRNUC 1H  
 IFR 490.15 MHz  
 IRSET 9.16 KHz  
 IRFIN 7.60 Hz  
 IRRPW 92 usec  
 IRATN 79  
 DFILE KO-ATX-p-PhONB-1H.als  
 SF 70.30 KHz  
 LKSET 32.5 Hz  
 LKFIN 0  
 LKLEV 0  
 LGAIN 0  
 LKPHS 0  
 LKSIG 0  
 CSPED 0 Hz  
 FILDC  
 FILDF

C:\Documents and Settings\PC-USER\My Documents\Data\okura\ATX\ECX and ECA\als\KO-ATX-p-PhONB-13C.als

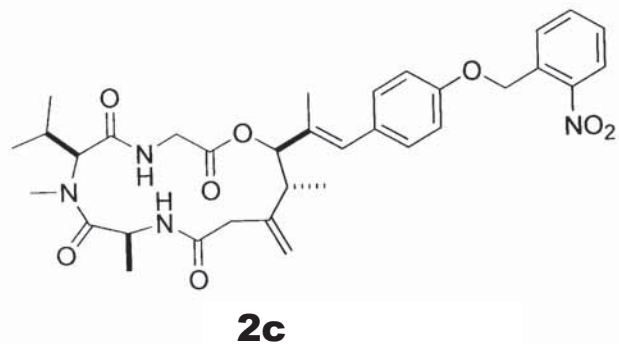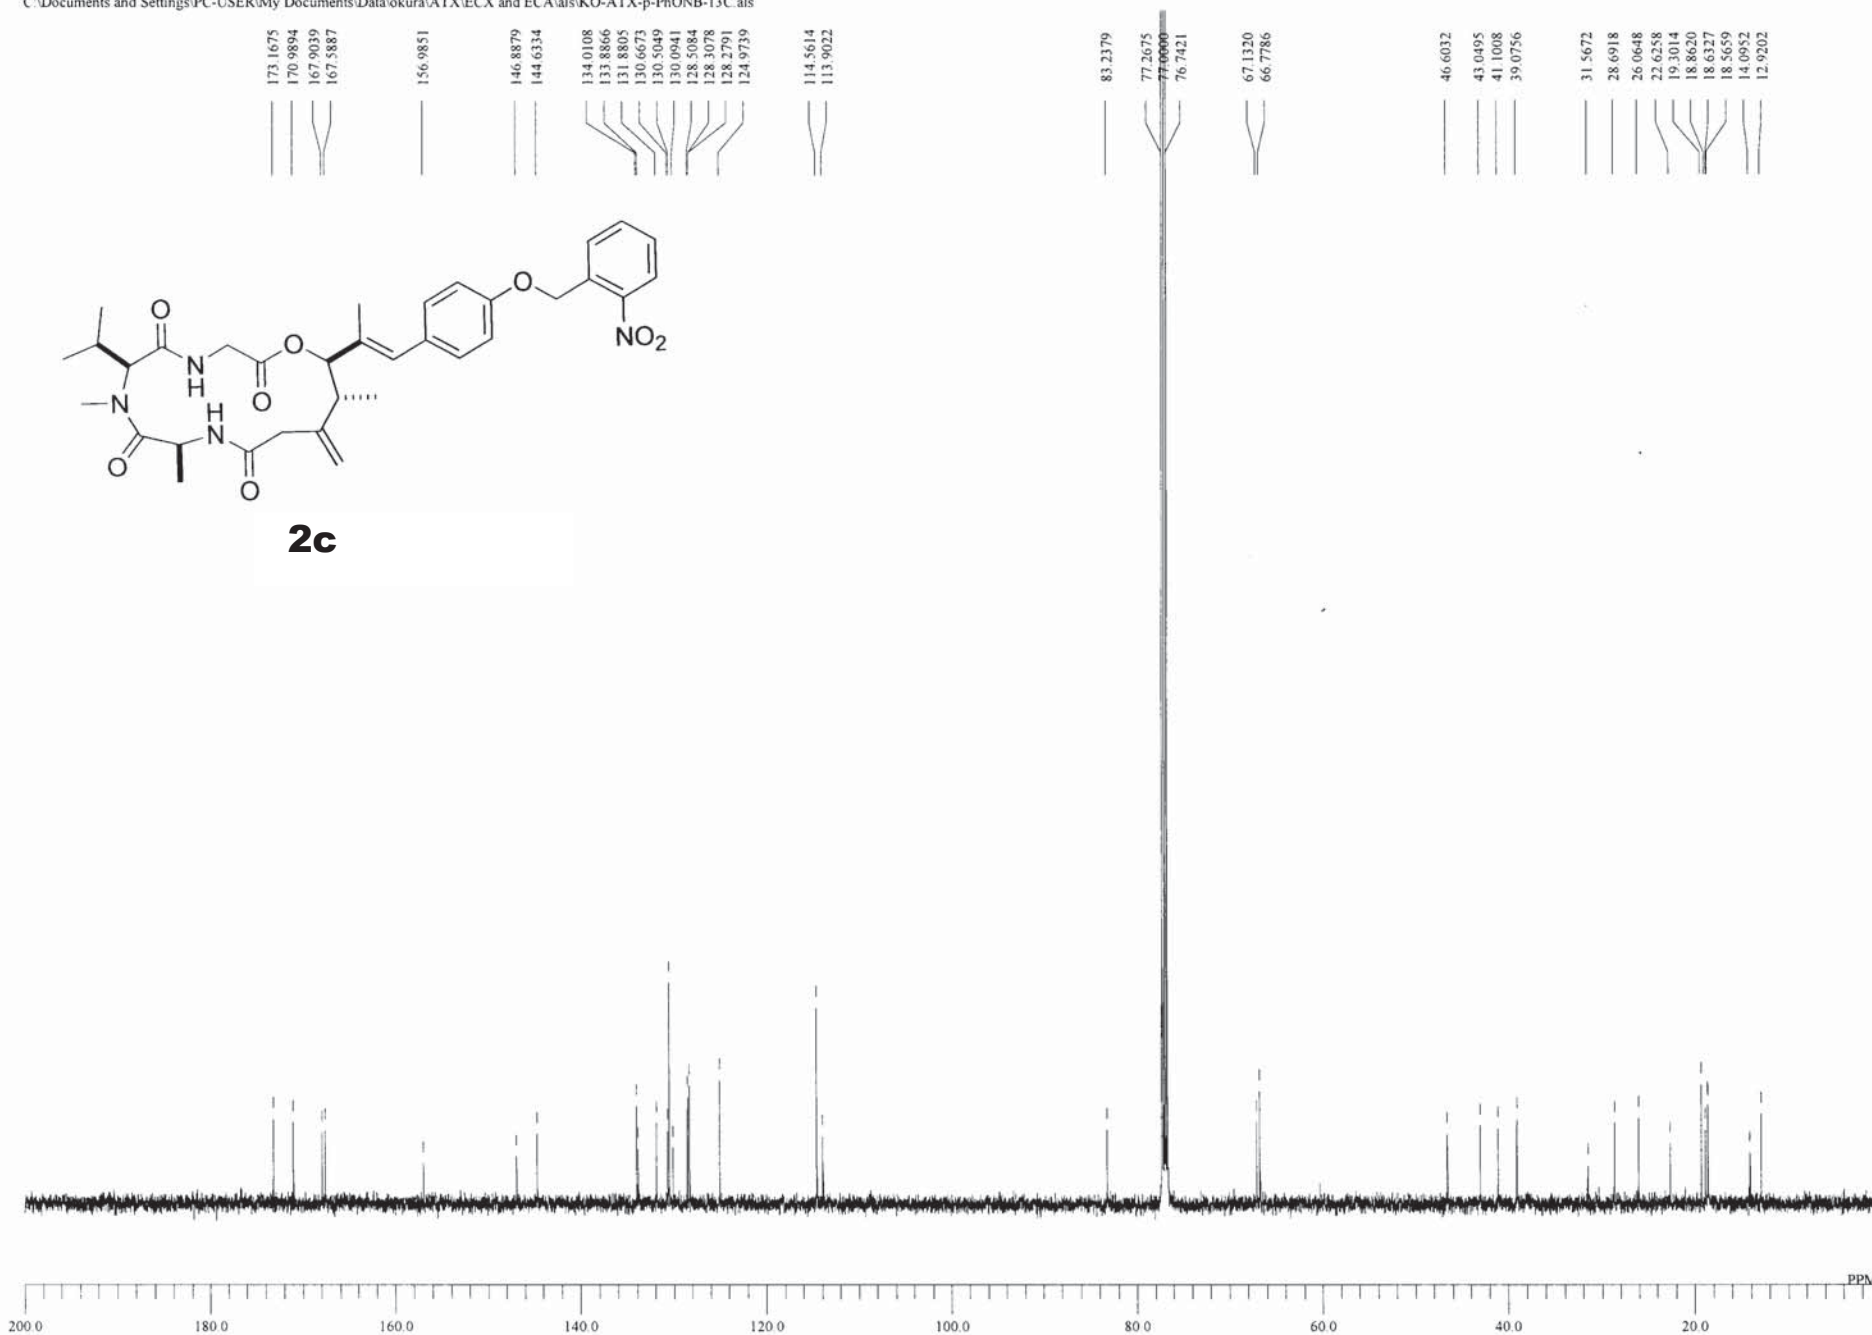

|       |                      |
|-------|----------------------|
| DATIM | 18-09-2010 09:07:10  |
| MENUF |                      |
| OBNUC | 13C                  |
| OFR   | 123.26 MHz           |
| OBSET | 2.31 KHz             |
| OBFIN | 6.71 Hz              |
| PWI   | 3.20 usec            |
| DEADT | 0.00 usec            |
| PREDL | 0.00000 msec         |
| IWT   | 1.0000 sec           |
| POINT | 26214                |
| SPO   | 26214                |
| TIMES | 512                  |
| DUMMY | 4                    |
| FREQU | 30863.73 Hz          |
| FLT   | 155000 Hz            |
| DELAY | 21.06 usec           |
| ACQTM | 0.8493 sec           |
| PD    | 10.0000 sec          |
| ADBIT | 16                   |
| RGAIN | 60                   |
| BF    | 1.00 Hz              |
| T1    | 0.00                 |
| T2    | 0.00                 |
| T3    | 90.00                |
| T4    | 100.00               |
| EXMOD | single_pulse_dec     |
| EXPCM |                      |
| IRNUC | 1H                   |
| IFR   | 490.15 MHz           |
| IRSET | 9.16 KHz             |
| IRFIN | 7.60 Hz              |
| IRRPW | 92 usec              |
| IRATN | 79                   |
| DFILE | KO-ATX-p-PhONB-13C : |
| SF    |                      |
| LKSET | 70.30 KHz            |
| LKFIN | 32.5 Hz              |
| LKLEV | 0                    |
| LGAIN | 0                    |
| LKPHS | 0                    |
| LKSIG | 0                    |
| CSPED | 0 Hz                 |
| FILDC |                      |
| FILDF |                      |

C:\Documents and Settings\PC-USER\My Documents\Data\okura\ATX\ECX and ECA\als\KO-ATX-o-CH(ONB)2-1H.als

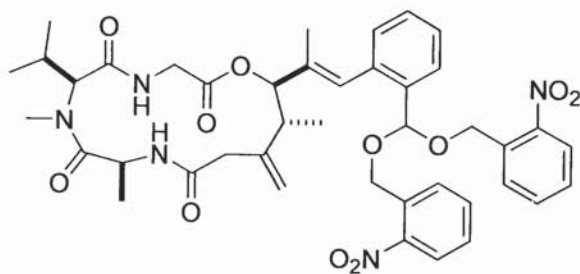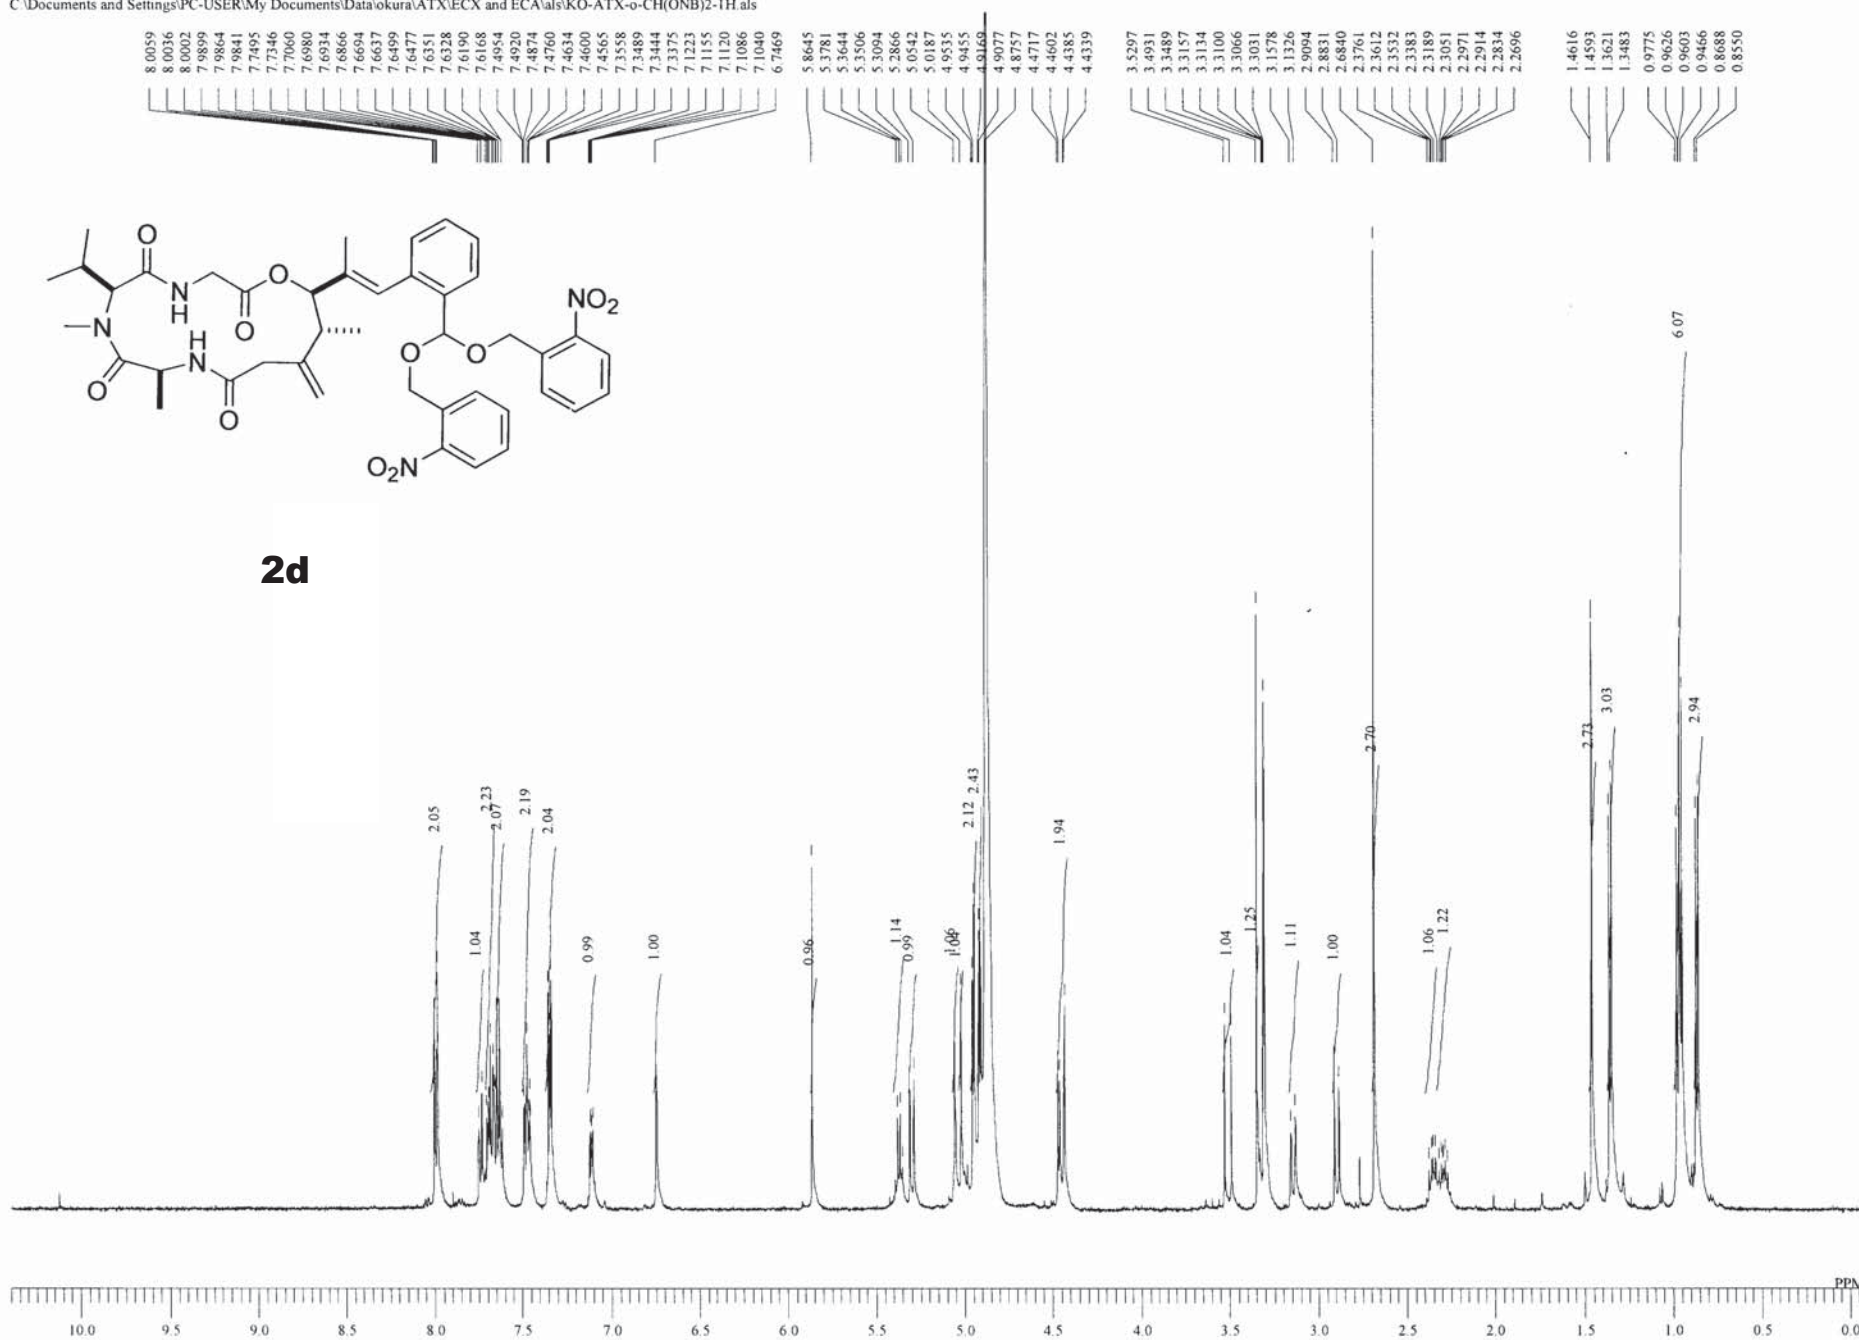

DATIM 16-02-2011 12:29:25  
 MENUF  
 OBNUC 1H  
 OFR 490.15 MHz  
 OBSET 9.16 KHz  
 OBFIN 7.60 Hz  
 PW1 8.55 usec  
 DEADT 0.00 usec  
 PREDL 0.00000 msec  
 IWT 1.0000 sec  
 POINT 13107  
 SPO 13107  
 TIMES 8  
 DUMMY 1  
 FREQU 7352.83 Hz  
 FLT 37000 Hz  
 DELAY 13.52 usec  
 ACQTM 1.7826 sec  
 PD 1.5000 sec  
 ADBIT 16  
 RGAIN 44  
 BF 0.01 Hz  
 T1 0.00  
 T2 0.00  
 T3 90.00  
 T4 100.00  
 EXMOD single\_pulse ex2  
 IRNUC 1H  
 IFR 490.15 MHz  
 IRSET 9.16 KHz  
 IRFIN 7.60 Hz  
 IRRPW 118 usec  
 IRATN 79  
 DFILE KO-ATX-o-CH(ONB)2-1  
 SF  
 LKSET 70.00 KHz  
 LKFIN 36.6 Hz  
 LKLEV 0  
 LGAIN 0  
 LKPHS 0  
 LKSIG 0  
 CSPED 0 Hz  
 FILDC  
 FILDF

C:\Documents and Settings\PC-USER\My Documents\Data\okura\ATX\ECX and ECA\als\KO-ATX-o-CH(ONB)2-13C.als

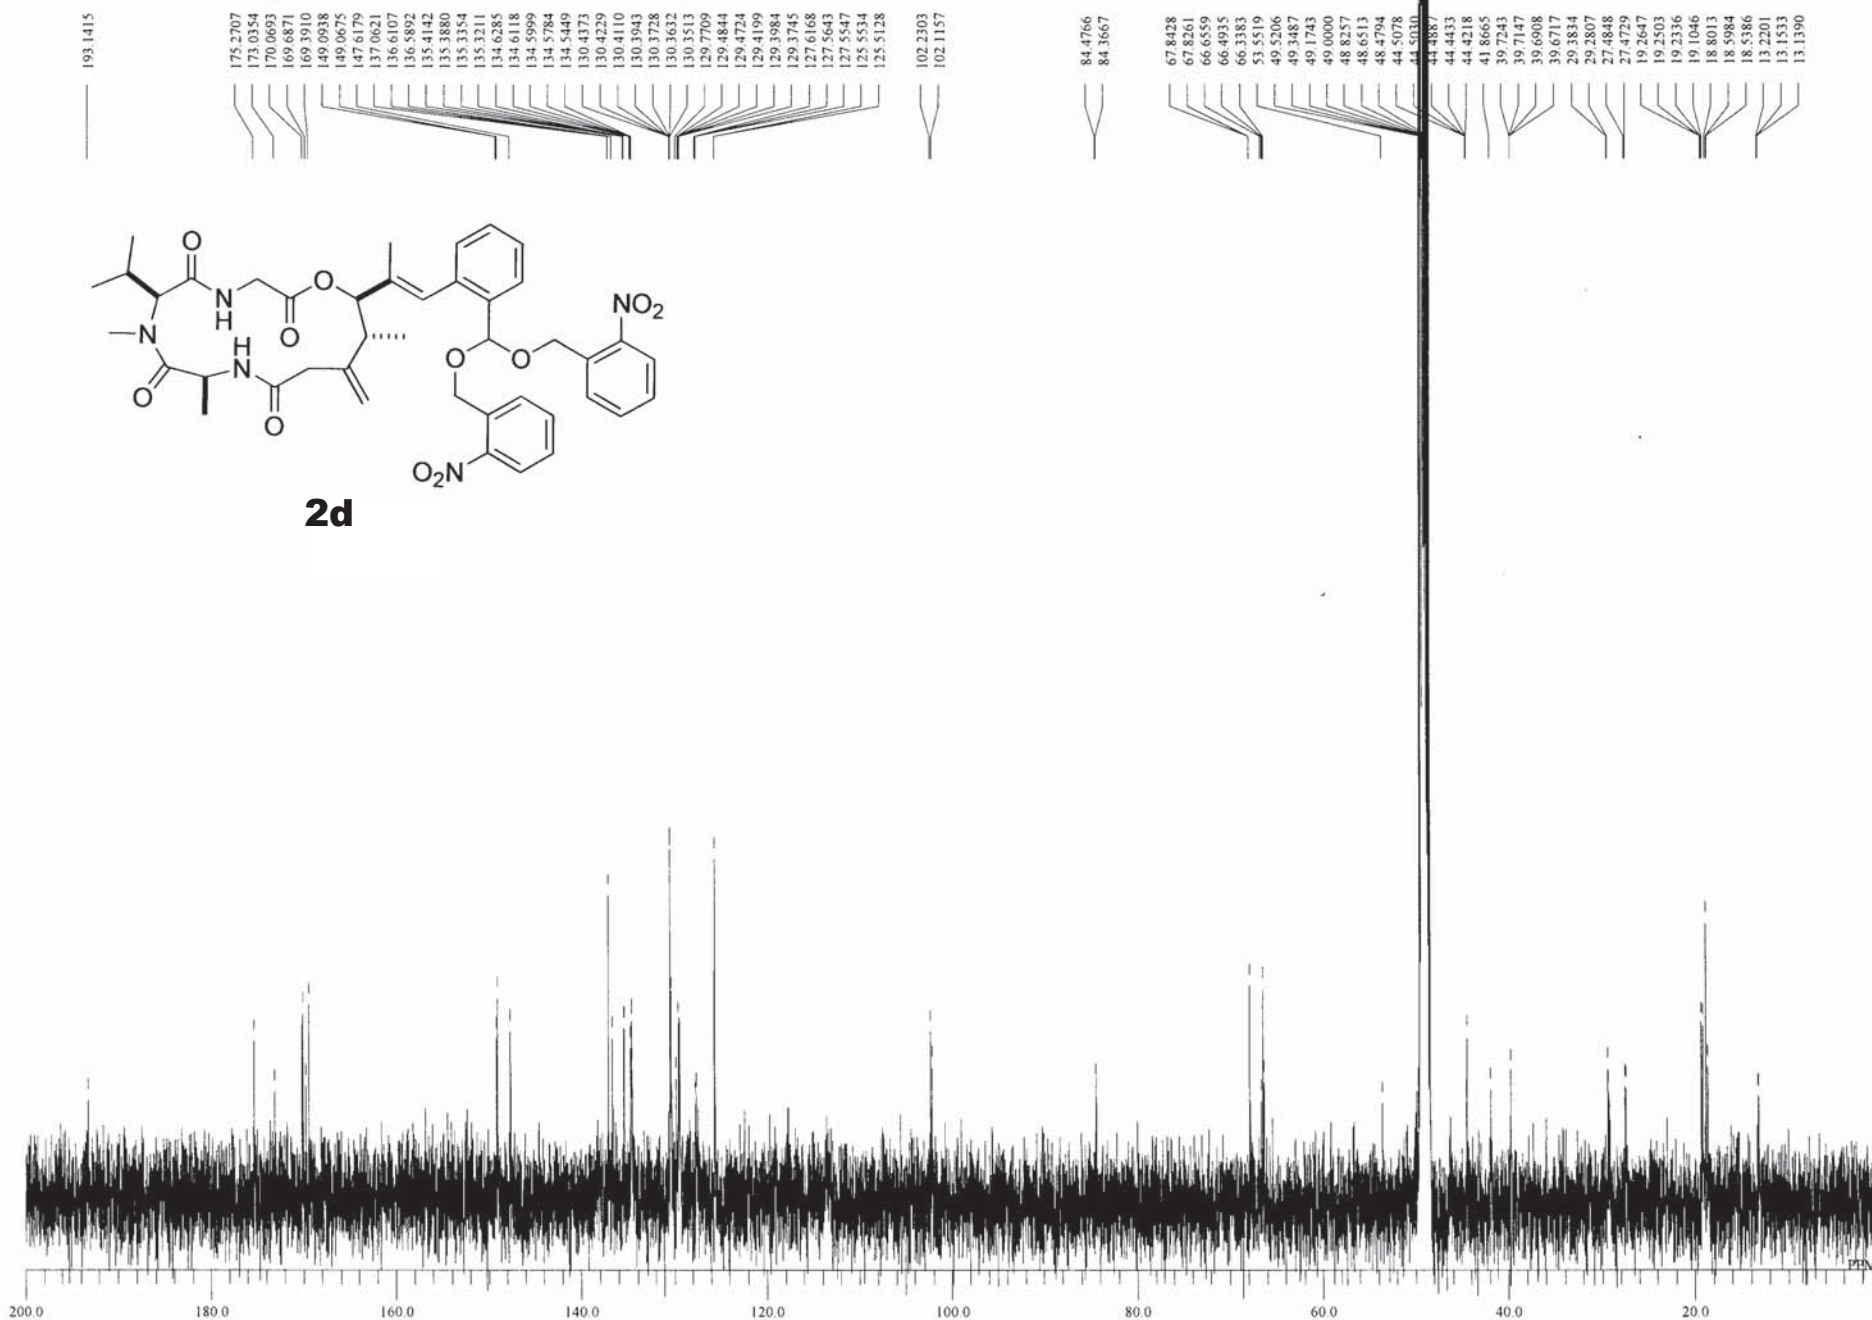

DATIM 16-02-2011 14:12:25  
 MENUF  
 OBNUC 13C  
 OFR 123.26 MHz  
 OBSET 2.31 KHz  
 OFBIN 6.71 Hz  
 PWI 3.20 usec  
 DEADT 0.00 usec  
 PREDL 0.00000 msec  
 IWT 1.0000 sec  
 POINT 104856  
 SPO 104856  
 TIMES 512  
 DUMMY 4  
 FREQU 30863.73 Hz  
 FLT 155000 Hz  
 DELAY 21.06 usec  
 ACQTM 0.8493 sec  
 PD 10.0000 sec  
 ADBIT 16  
 RGAIN 60  
 BF 1.00 Hz  
 T1 0.00  
 T2 0.00  
 T3 90.00  
 T4 100.00  
 EXMOD single\_pulse\_dec  
 EXPCM  
 IRNUC 1H  
 IFR 490.15 MHz  
 IRSET 9.16 KHz  
 IRFIN 7.60 Hz  
 IRRPW 92 usec  
 IRATN 79  
 DFILE KO-ATX-o-CH(ONB)2-1  
 SF  
 LKSET 70.00 KHz  
 LKFIN 36.6 Hz  
 LKLEV 0  
 LGAIN 0  
 LKPHS 0  
 LKSIG 0  
 CSPED 0 Hz  
 FILDC  
 FILDF

C:\Documents and Settings\PC-USER\My Documents\Data\okura\ATX\ECX and ECA\als\KO-ATX-m-CH(ONB)2-1H.als

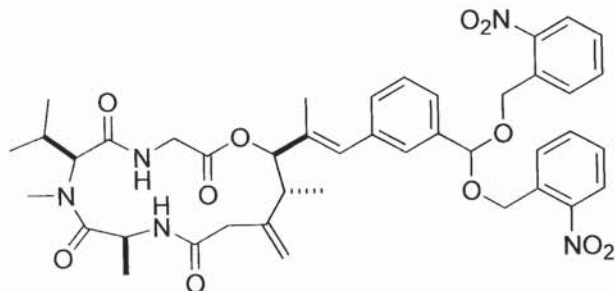

2e

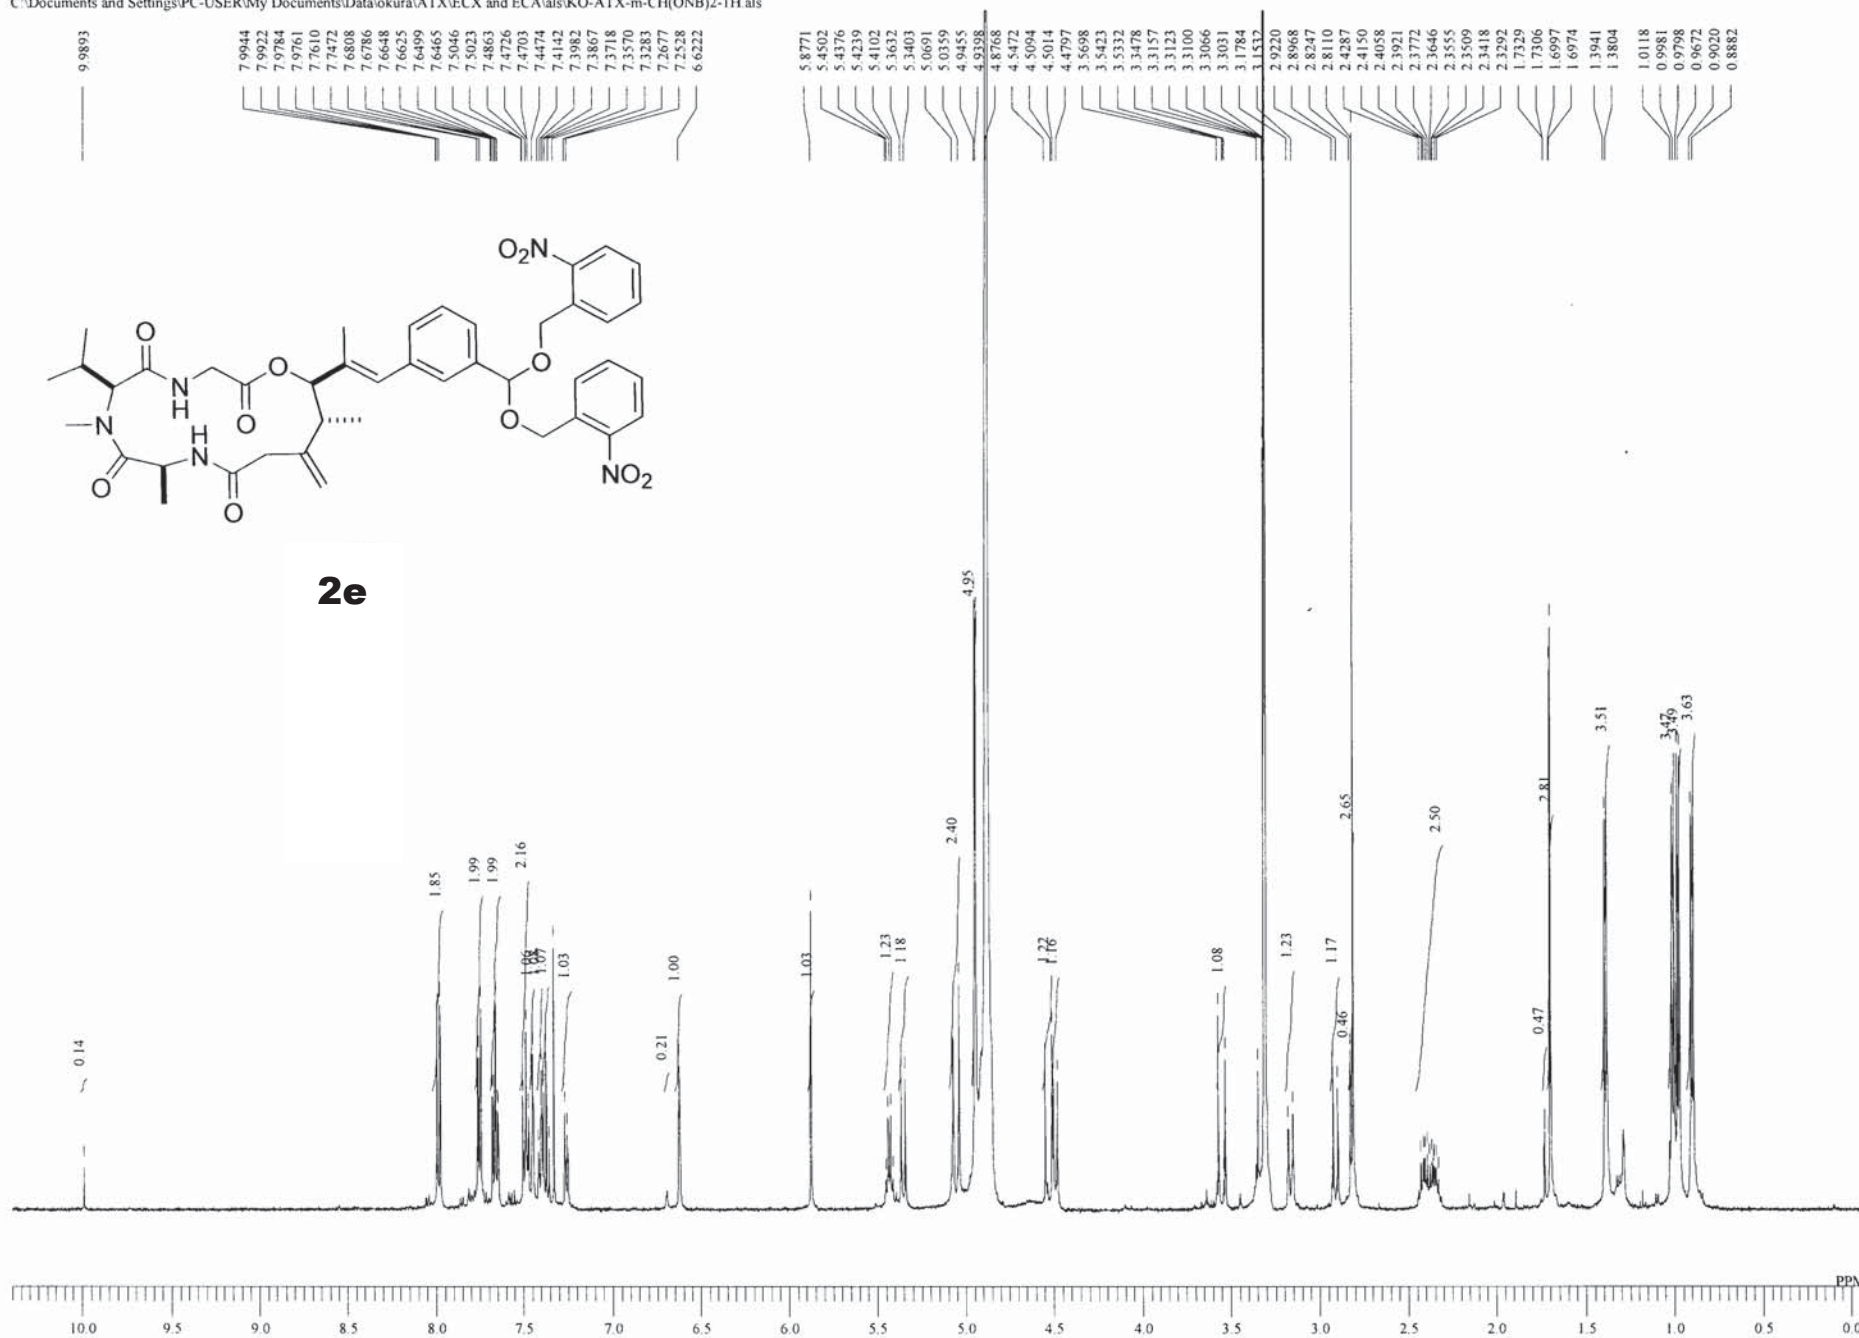

|       |                     |
|-------|---------------------|
| DATIM | 30-01-2011 07:53:56 |
| MENUP |                     |
| OBNUC | <sup>1</sup> H      |
| OFR   | 490.15 MHz          |
| OBSET | 9.16 KHz            |
| OBFIN | 7.60 Hz             |
| PW1   | 8.55 usec           |
| DEADT | 0.00 usec           |
| PREDL | 0.00000 msec        |
| IWT   | 1.0000 sec          |
| POINT | 13107               |
| SPO   | 13107               |
| TIMES | 8                   |
| DUMMY | 1                   |
| FREQU | 7352.83 Hz          |
| FLT   | 37000 Hz            |
| DELAY | 13.52 usec          |
| ACQTM | 1.7826 sec          |
| PD    | 1.5000 sec          |
| ADBIT | 16                  |
| RGAIN | 44                  |
| BF    | 0.01 Hz             |
| T1    | 0.00                |
| T2    | 0.00                |
| T3    | 90.00               |
| T4    | 100.00              |
| EXMOD | single_pulse ex2    |
| EXPCM |                     |
| IRNUC | <sup>1</sup> H      |
| IFR   | 490.15 MHz          |
| IRSET | 9.16 KHz            |
| IRFIN | 7.60 Hz             |
| IRRPW | 118 usec            |
| IRATN | 79                  |
| DFILE | KO-ATX-m-CH(ONB)2-1 |
| SF    |                     |
| LKSET | 70.00 KHz           |
| LKFIN | 36.6 Hz             |
| LKLEV | 0                   |
| LGAIN | 0                   |
| LKPHS | 0                   |
| LKSIG | 0                   |
| CSPED | 0 Hz                |
| FILDC |                     |
| FILDF |                     |

C:\Documents and Settings\PC-USER\My Documents\Data\okura\ATX\ECX and ECA\als\KO-ATX-m-CH(ONB)2-13C-2.als

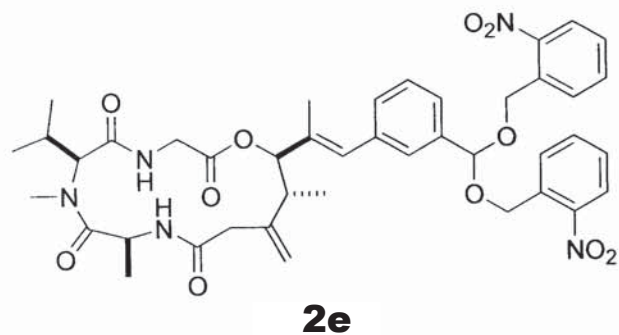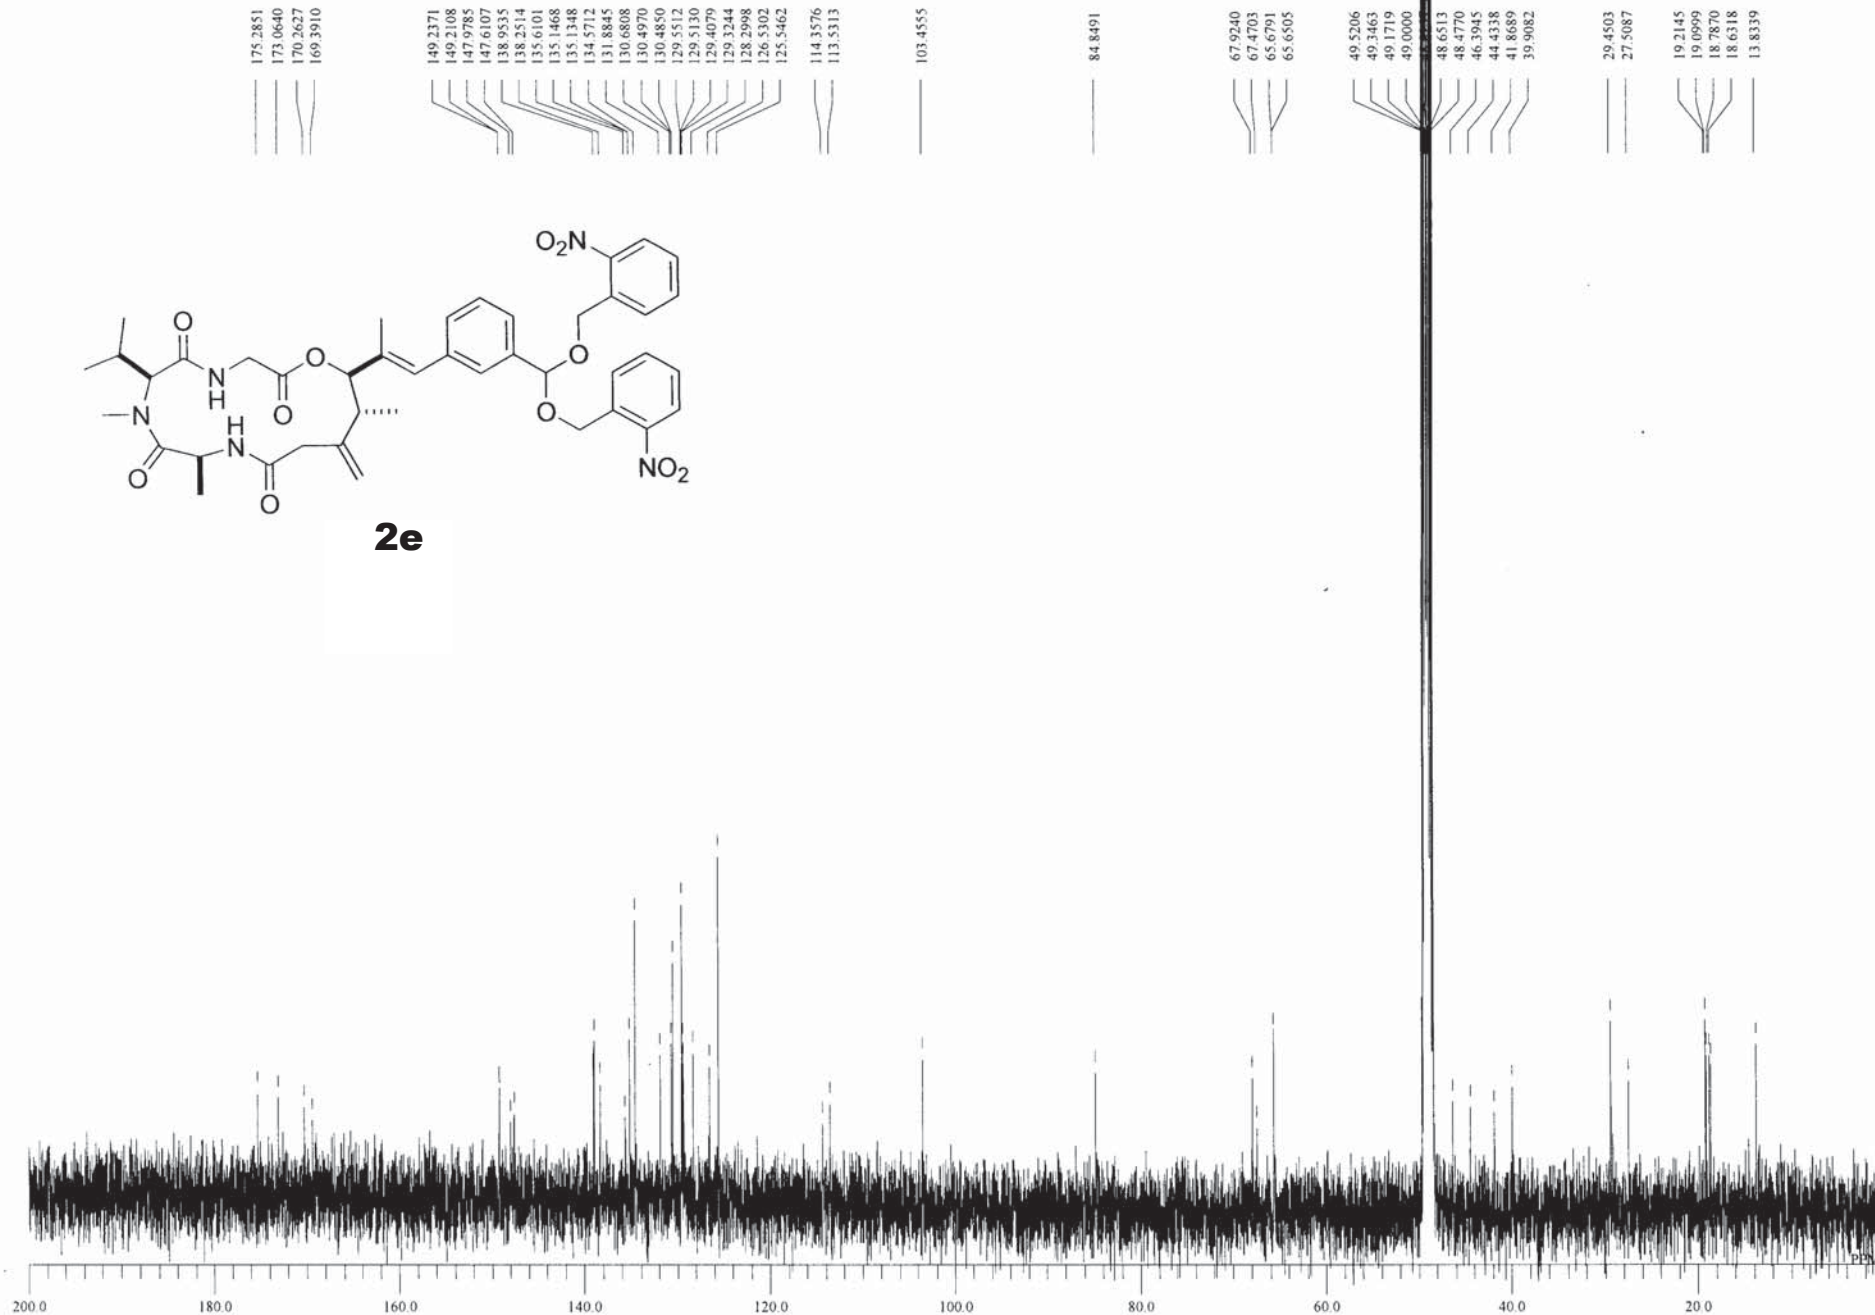

DATIM 30-01-2011 14:07:58  
 MENUF  
 OBNUC 13C  
 OFR 123.26 MHz  
 OBSSET 2.31 KHz  
 OFBIN 6.71 Hz  
 PW1 3.20 usec  
 DEADT 0.00 usec  
 PREDL 0.00000 msec  
 IWT 1.0000 sec  
 POINT 104856  
 SPO 104856  
 TIMES 2048  
 DUMMY 4  
 FREQU 30863.73 Hz  
 FLT 155000 Hz  
 DELAY 21.06 usec  
 ACQTM 0.8493 sec  
 PD 10.0000 sec  
 ADBIT 16  
 RGAIN 60  
 BF 1.00 Hz  
 T1 0.00  
 T2 0.00  
 T3 90.00  
 T4 100.00  
 EXMOD single\_pulse\_dec  
 EXPCM  
 IRNUC 1H  
 IFR 490.15 MHz  
 IRSET 9.16 KHz  
 IRFIN 7.60 Hz  
 IRRPW 92 usec  
 IRATN 79  
 DFILE KO-ATX-m-CH(ONB)2-1  
 SF  
 LKSET 70.00 KHz  
 LKFIN 36.6 Hz  
 LKLEV 0  
 LGAIN 0  
 LKPHS 0  
 LKSIG 0  
 CSPED 0 Hz  
 FILDC  
 FILDF

C:\Documents and Settings\PC-USER\My Documents\Data\okura\ATX\ECX and ECA\als\KO-ATX-p-CH(ONB)2-1H.als

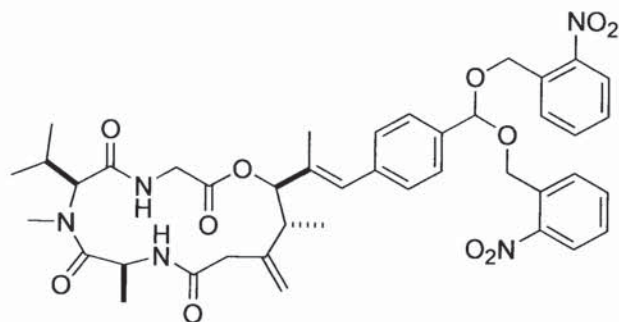

**2f**

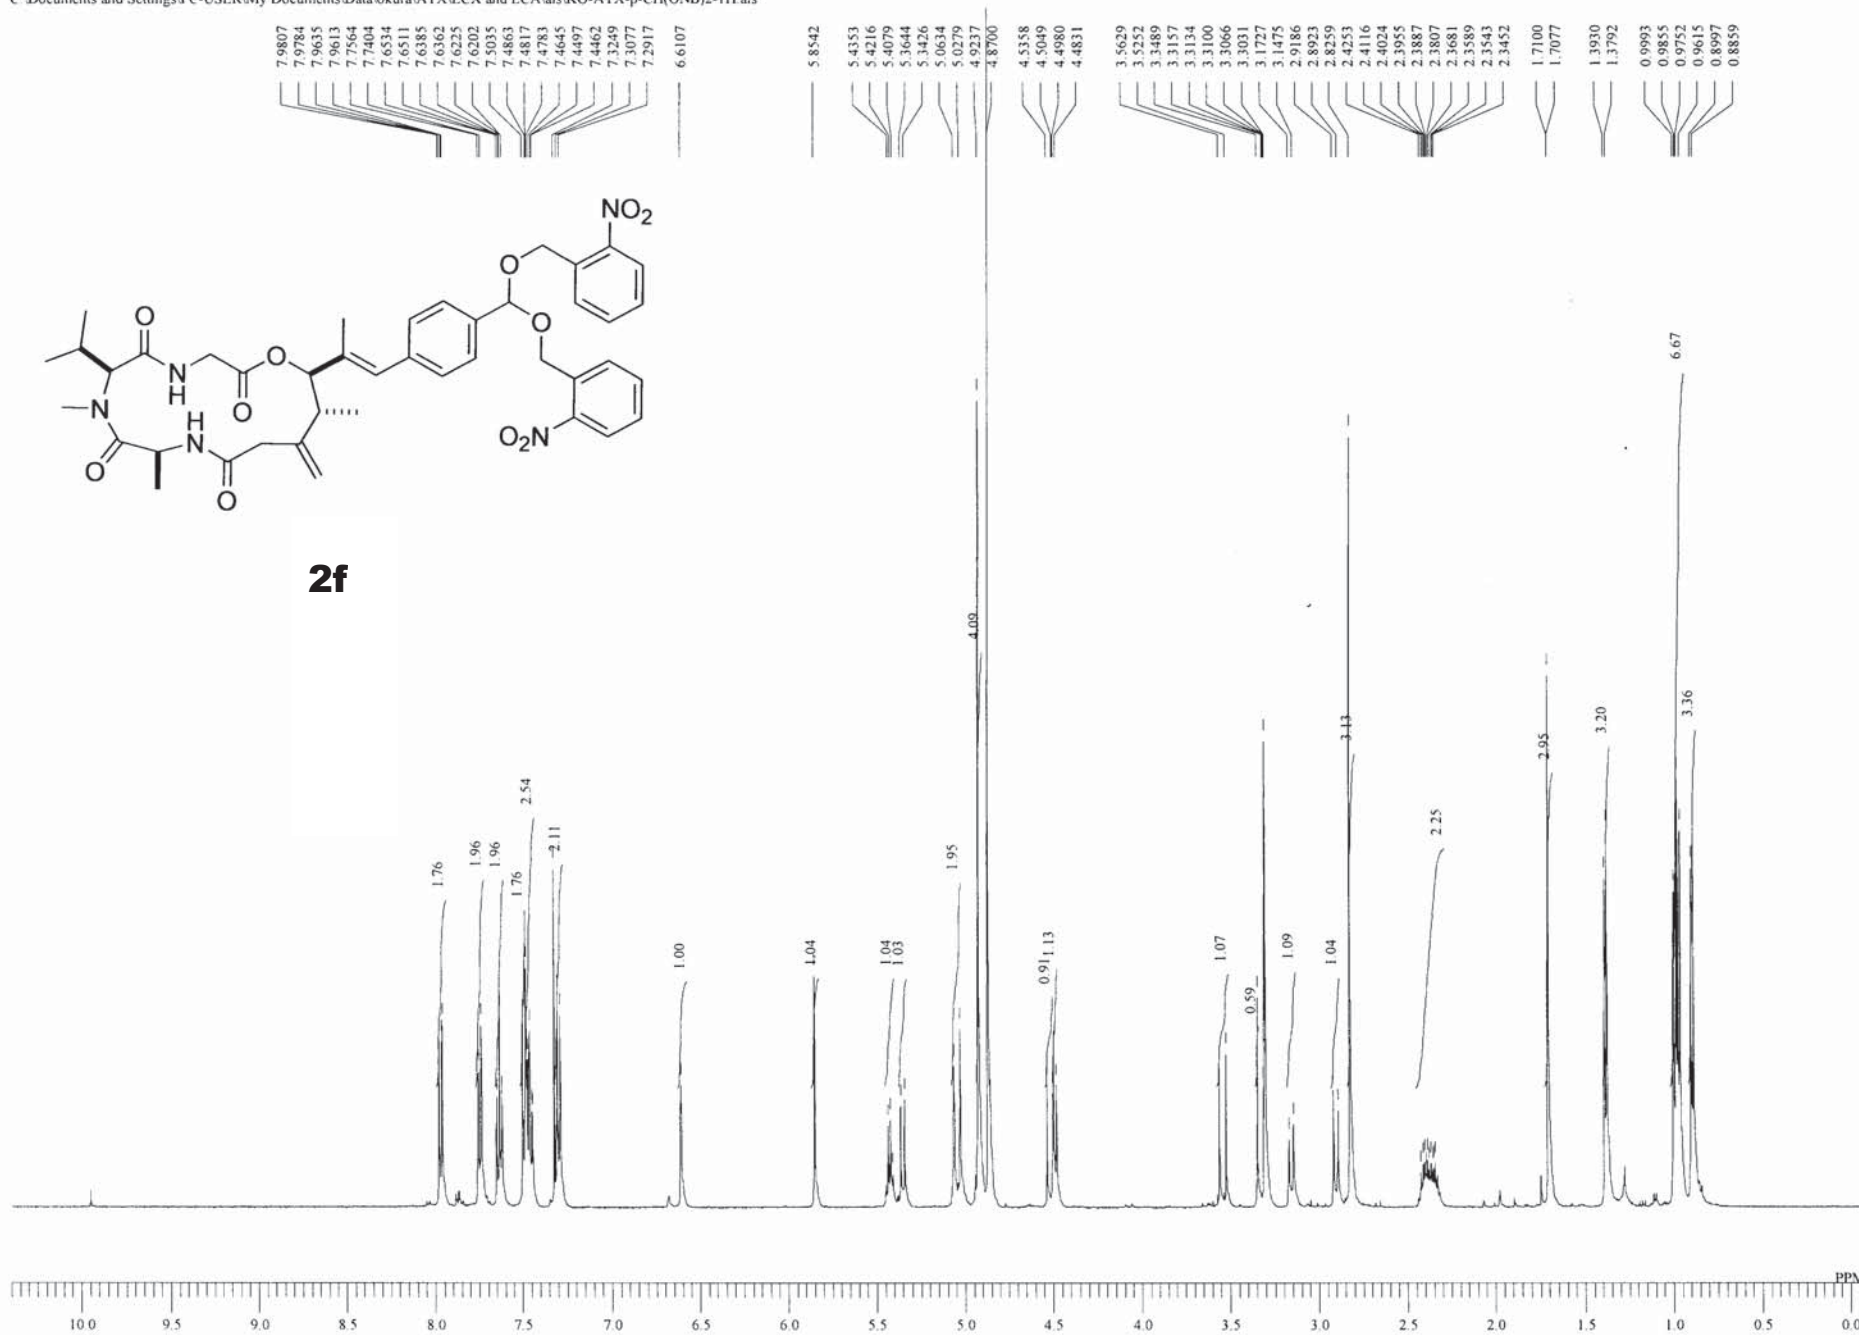

|       |                     |
|-------|---------------------|
| DATIM | 30-01-2011 02:02:29 |
| MENUP |                     |
| OBNUC | <sup>1</sup> H      |
| OFR   | 490.15 MHz          |
| OBSET | 9.16 KHz            |
| OBFIN | 7.60 Hz             |
| PWI   | 8.55 usec           |
| DEADT | 0.00 usec           |
| PREDL | 0.00000 msec        |
| IWT   | 1.0000 sec          |
| POINT | 13107               |
| SPO   | 13107               |
| TIMES | 8                   |
| DUMMY | 1                   |
| FREQU | 7352.83 Hz          |
| FLT   | 37000 Hz            |
| DELAY | 13.52 usec          |
| ACQTM | 1.7826 sec          |
| PD    | 1.5000 sec          |
| ADBIT | 16                  |
| RGAIN | 36                  |
| BF    | 0.01 Hz             |
| T1    | 0.00                |
| T2    | 0.00                |
| T3    | 90.00               |
| T4    | 100.00              |
| EXMOD | single_pulse ex2    |
| EXPCM |                     |
| IRNUC | <sup>1</sup> H      |
| IFR   | 490.15 MHz          |
| IRSET | 9.16 KHz            |
| IRFIN | 7.60 Hz             |
| IRRPW | 92 usec             |
| IRATN | 79                  |
| DFILE | KO-ATX-p-CH(ONB)2-1 |
| SF    |                     |
| LKSET | 70.00 KHz           |
| LKFIN | 36.6 Hz             |
| LKLEV | 0                   |
| LGAIN | 0                   |
| LKPHS | 0                   |
| LKSIG | 0                   |
| CSPED | 0 Hz                |
| FILDC |                     |
| FILDF |                     |



C:\Documents and Settings\PC-USER\My Documents\Data\okura\ATX\ECX and ECA\als\KO-ATX-p-CH(ONB)2-13C.als

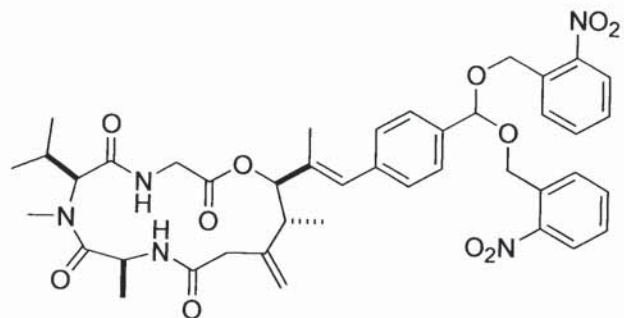

**2f**

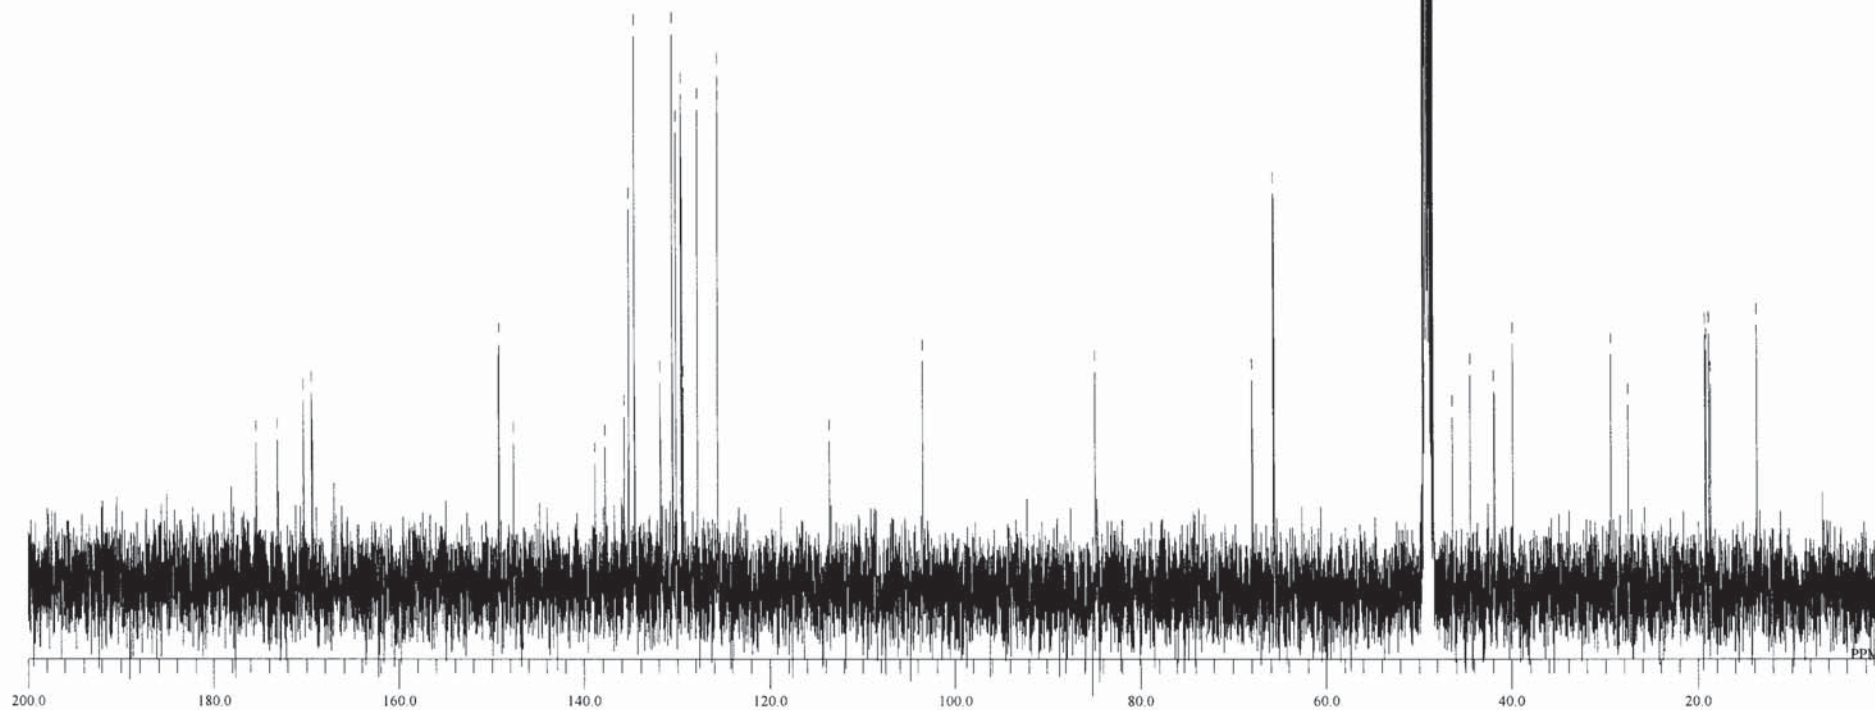

175.3066  
173.0378  
170.2388  
169.3361

149.1607  
147.5797

138.7529  
137.6544  
135.6817  
135.1897  
134.5640  
131.7746  
130.4802  
129.4868  
129.3196  
127.7482  
125.5271

113.5384

103.3934

85.1715  
84.8515

67.9097  
65.6218

49.5254  
49.3487  
49.1767  
49.0000

48.6561  
48.4794  
46.3921  
44.4386  
41.8593  
39.8676

29.3977  
27.5063

19.2193  
19.1046  
18.7894  
18.6366  
13.7503

DATIM 30-01-2011 02:49:34  
 MENUF  
 OBNUC 13C  
 OFR 123.26 MHz  
 OBSET 2.31 KHz  
 OFBIN 6.71 Hz  
 PW1 3.20 usec  
 DEADT 0.00 usec  
 PREDL 0.00000 msec  
 IWT 1.0000 sec  
 POINT 52428  
 SPO 52428  
 TIMES 256  
 DUMMY 4  
 FREQU 30863.73 Hz  
 FLT 155000 Hz  
 DELAY 21.06 usec  
 ACQTM 0.8493 sec  
 PD 10.0000 sec  
 ADBIT 16  
 RGAIN 60  
 BF 1.00 Hz  
 T1 0.00  
 T2 0.00  
 T3 90.00  
 T4 100.00  
 EXMOD single\_pulse\_dec  
 EXPCM  
 IRNUC 1H  
 IFR 490.15 MHz  
 IRSET 9.16 KHz  
 IRFIN 7.60 Hz  
 IRRPW 92 usec  
 IRATN 79  
 DFILE KO-ATX-p-CH(ONB)2-1  
 SF  
 LKSET 70.00 KHz  
 LKFIN 36.6 Hz  
 LKLEV 0  
 LGAIN 0  
 LKPHS 0  
 LKSIG 0  
 CSPED 0 Hz  
 FILDC  
 FILDF

C:\Documents and Settings\PC-USER\My Documents\Data\okura\ATX\ECX and ECA\als\KO-ATX-o-PhOH-1H.als

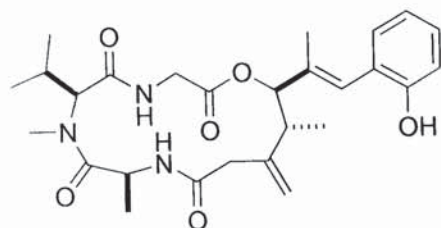

**7a**

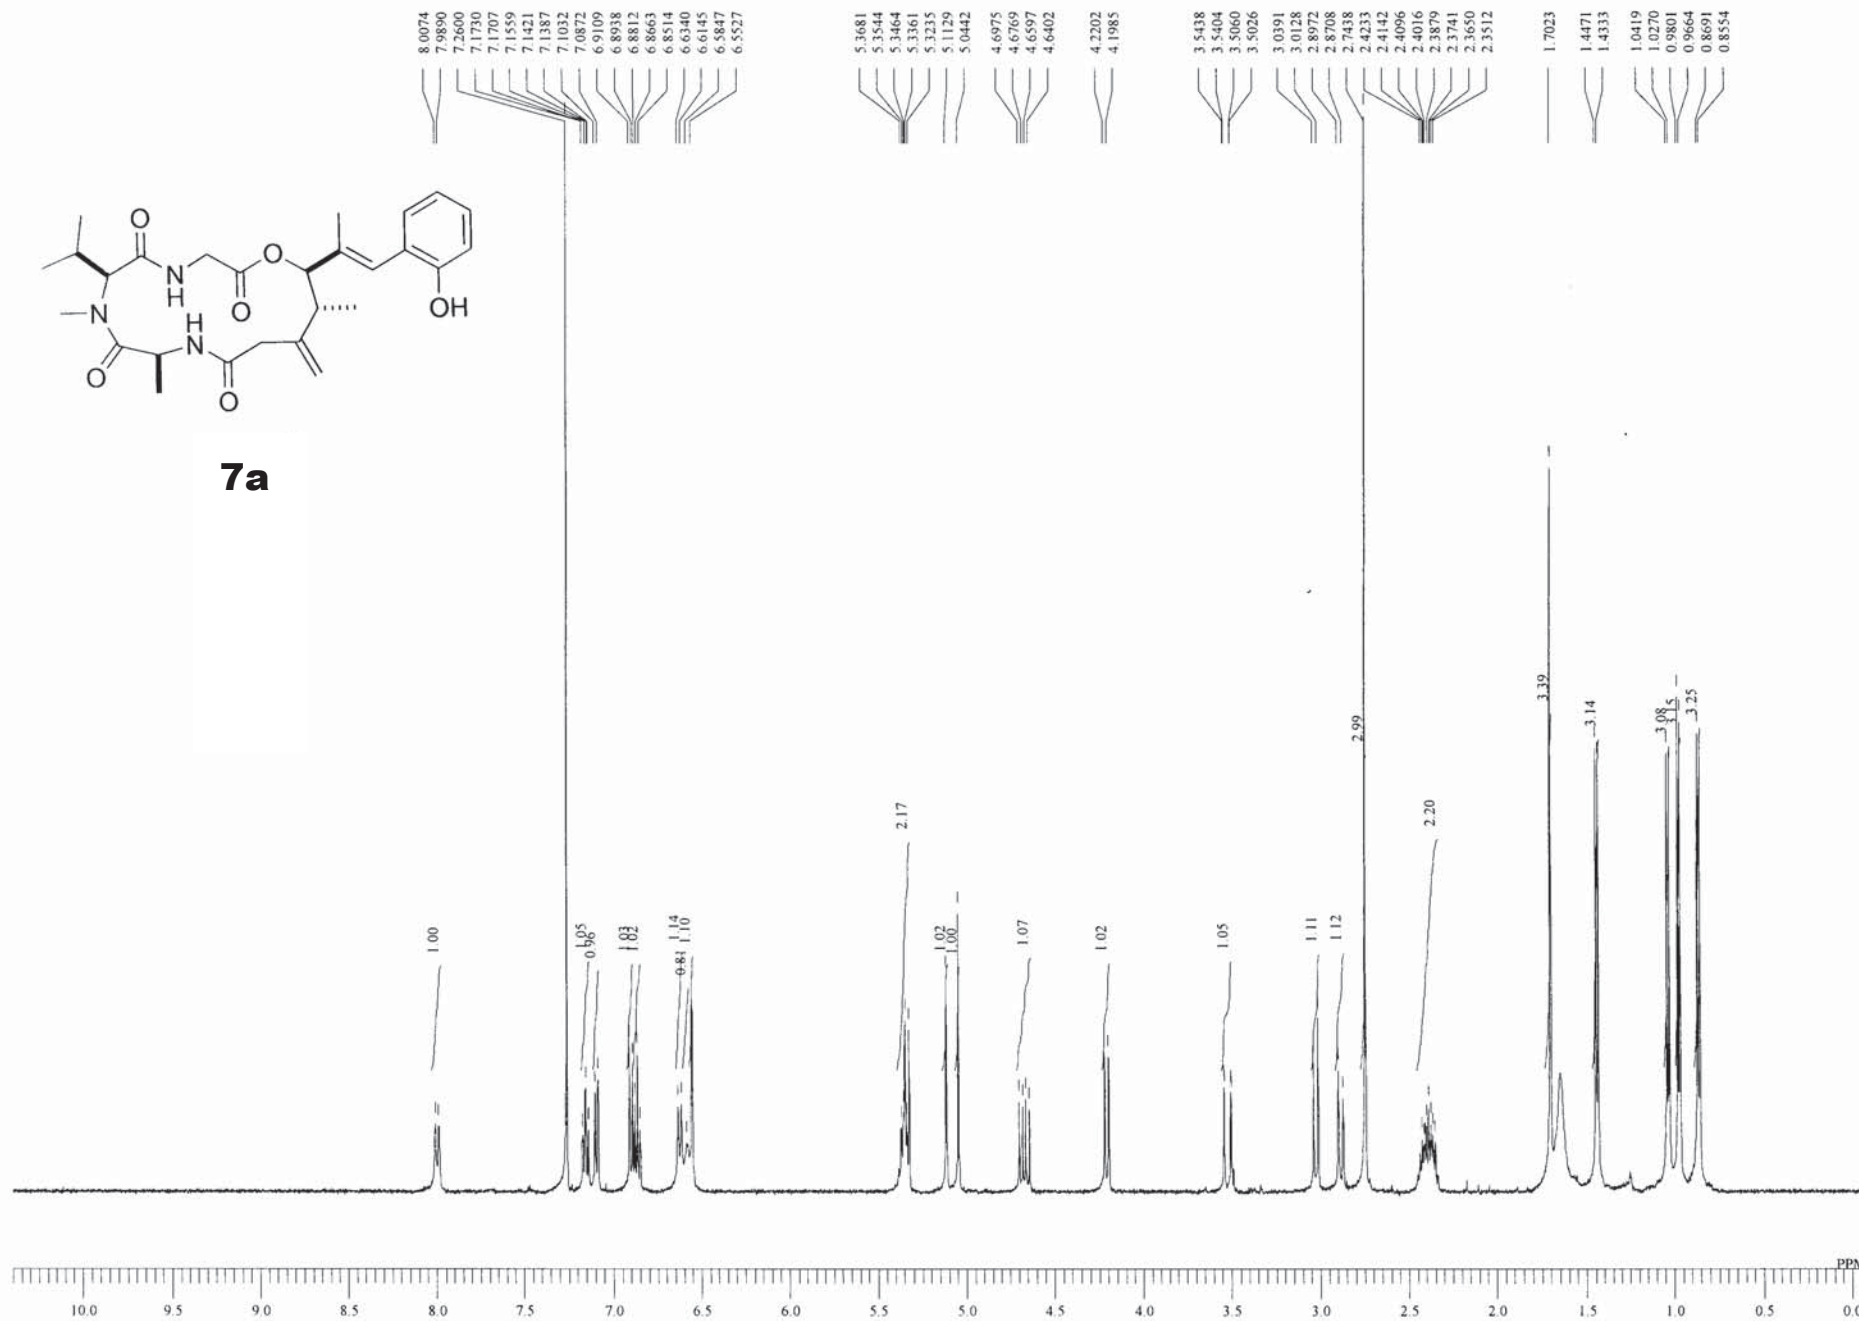

|       |                      |
|-------|----------------------|
| DATIM | 04-03-2011 23:42:38  |
| MENUP |                      |
| OBNUC | <sup>1</sup> H       |
| OFR   | 490.15 MHz           |
| OBSET | 9.16 KHz             |
| OBFIN | 7.60 Hz              |
| PW1   | 8.55 usec            |
| DEADT | 0.00 usec            |
| PREDL | 0.00000 msec         |
| IWT   | 1.0000 sec           |
| POINT | 13107                |
| SPO   | 13107                |
| TIMES | 8                    |
| DUMMY | 1                    |
| FREQU | 7352.83 Hz           |
| FLT   | 37000 Hz             |
| DELAY | 13.52 usec           |
| ACQTM | 1.7826 sec           |
| PD    | 1.5000 sec           |
| ADBIT | 16                   |
| RGAIN | 46                   |
| BF    | 0.01 Hz              |
| T1    | 0.00                 |
| T2    | 0.00                 |
| T3    | 90.00                |
| T4    | 100.00               |
| EXMOD | single_pulse.ex2     |
| EXPCM |                      |
| IRNUC | <sup>1</sup> H       |
| IFR   | 490.15 MHz           |
| IRSET | 9.16 KHz             |
| IRFIN | 7.60 Hz              |
| IRRPW | 118 usec             |
| IRATN | 79                   |
| DFILE | KO-ATX-o-PhOH-1H.als |
| SF    |                      |
| LKSET | 70.30 KHz            |
| LKFIN | 32.5 Hz              |
| LKLEV | 0                    |
| LGAIN | 0                    |
| LKPHS | 0                    |
| LKSIG | 0                    |
| CSPED | 0 Hz                 |
| FILDC |                      |
| FILDF |                      |

C:\Documents and Settings\PC-USER\My Documents\Data\okura\ATX\ECX and ECA\als\KO-ATX-o-PhOH-13C.als

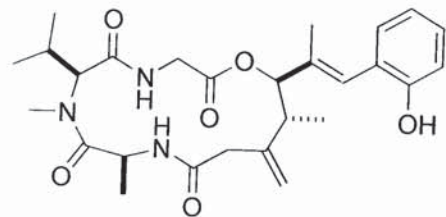

**7a**

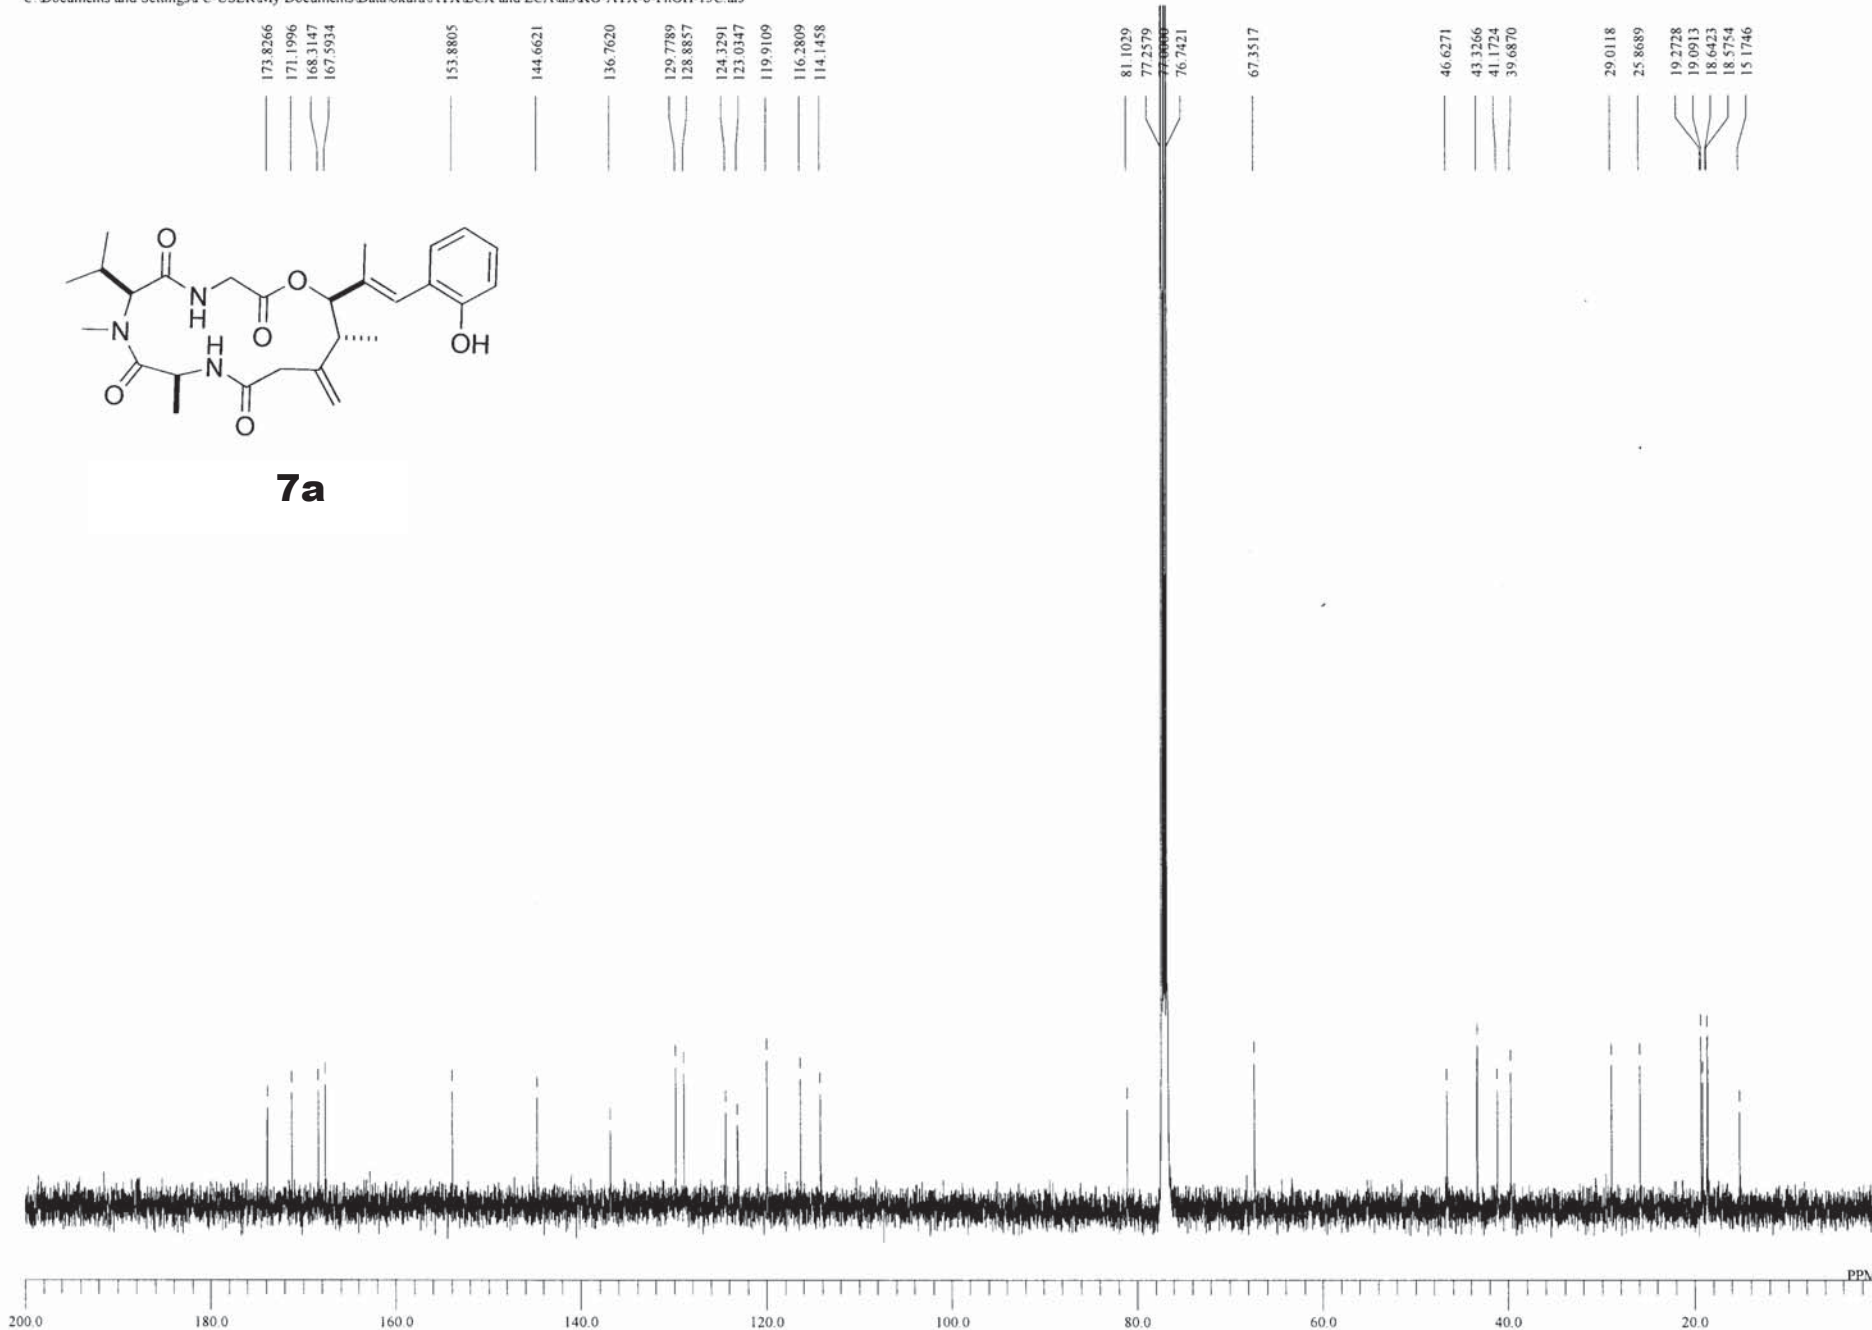

DATIM 05-03-2011 09:11:27  
 MENUF  
 OBNUC 13C  
 OFR 123.26 MHz  
 OBSSET 2.31 KHz  
 OBFIN 6.71 Hz  
 PW1 3.20 usec  
 DEADT 0.00 usec  
 PREDL 0.00000 msec  
 IWT 1.0000 sec  
 POINT 52428  
 SPO 52428  
 TIMES 3072  
 DUMMY 4  
 FREQU 30863.73 Hz  
 FLT 155000 Hz  
 DELAY 21.06 usec  
 ACQTM 0.8493 sec  
 PD 10.0000 sec  
 ADBIT 16  
 RGAIN 60  
 BF 1.00 Hz  
 T1 0.00  
 T2 0.00  
 T3 90.00  
 T4 100.00  
 EXMOD single\_pulse\_dec  
 EXPCM  
 IRNUC 1H  
 IFR 490.15 MHz  
 IRSET 9.16 KHz  
 IRFIN 7.60 Hz  
 IRRPW 92 usec  
 IRATN 79  
 DFILE KO-ATX-o-PhOH-13C.als  
 SF  
 LKSET 70.30 KHz  
 LKFIN 32.5 Hz  
 LKLEV 0  
 LGAIN 0  
 LKPHS 0  
 LKSIG 0  
 CSPED 0 Hz  
 FILDC  
 FILDF

C:\Documents and Settings\PC-USER\My Documents\Data\okura\ATX\ECX and ECA\als\KO-ATX-m-PhOH-1H.als

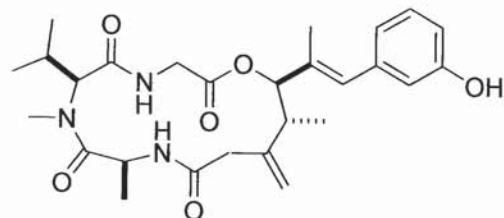

**7b**

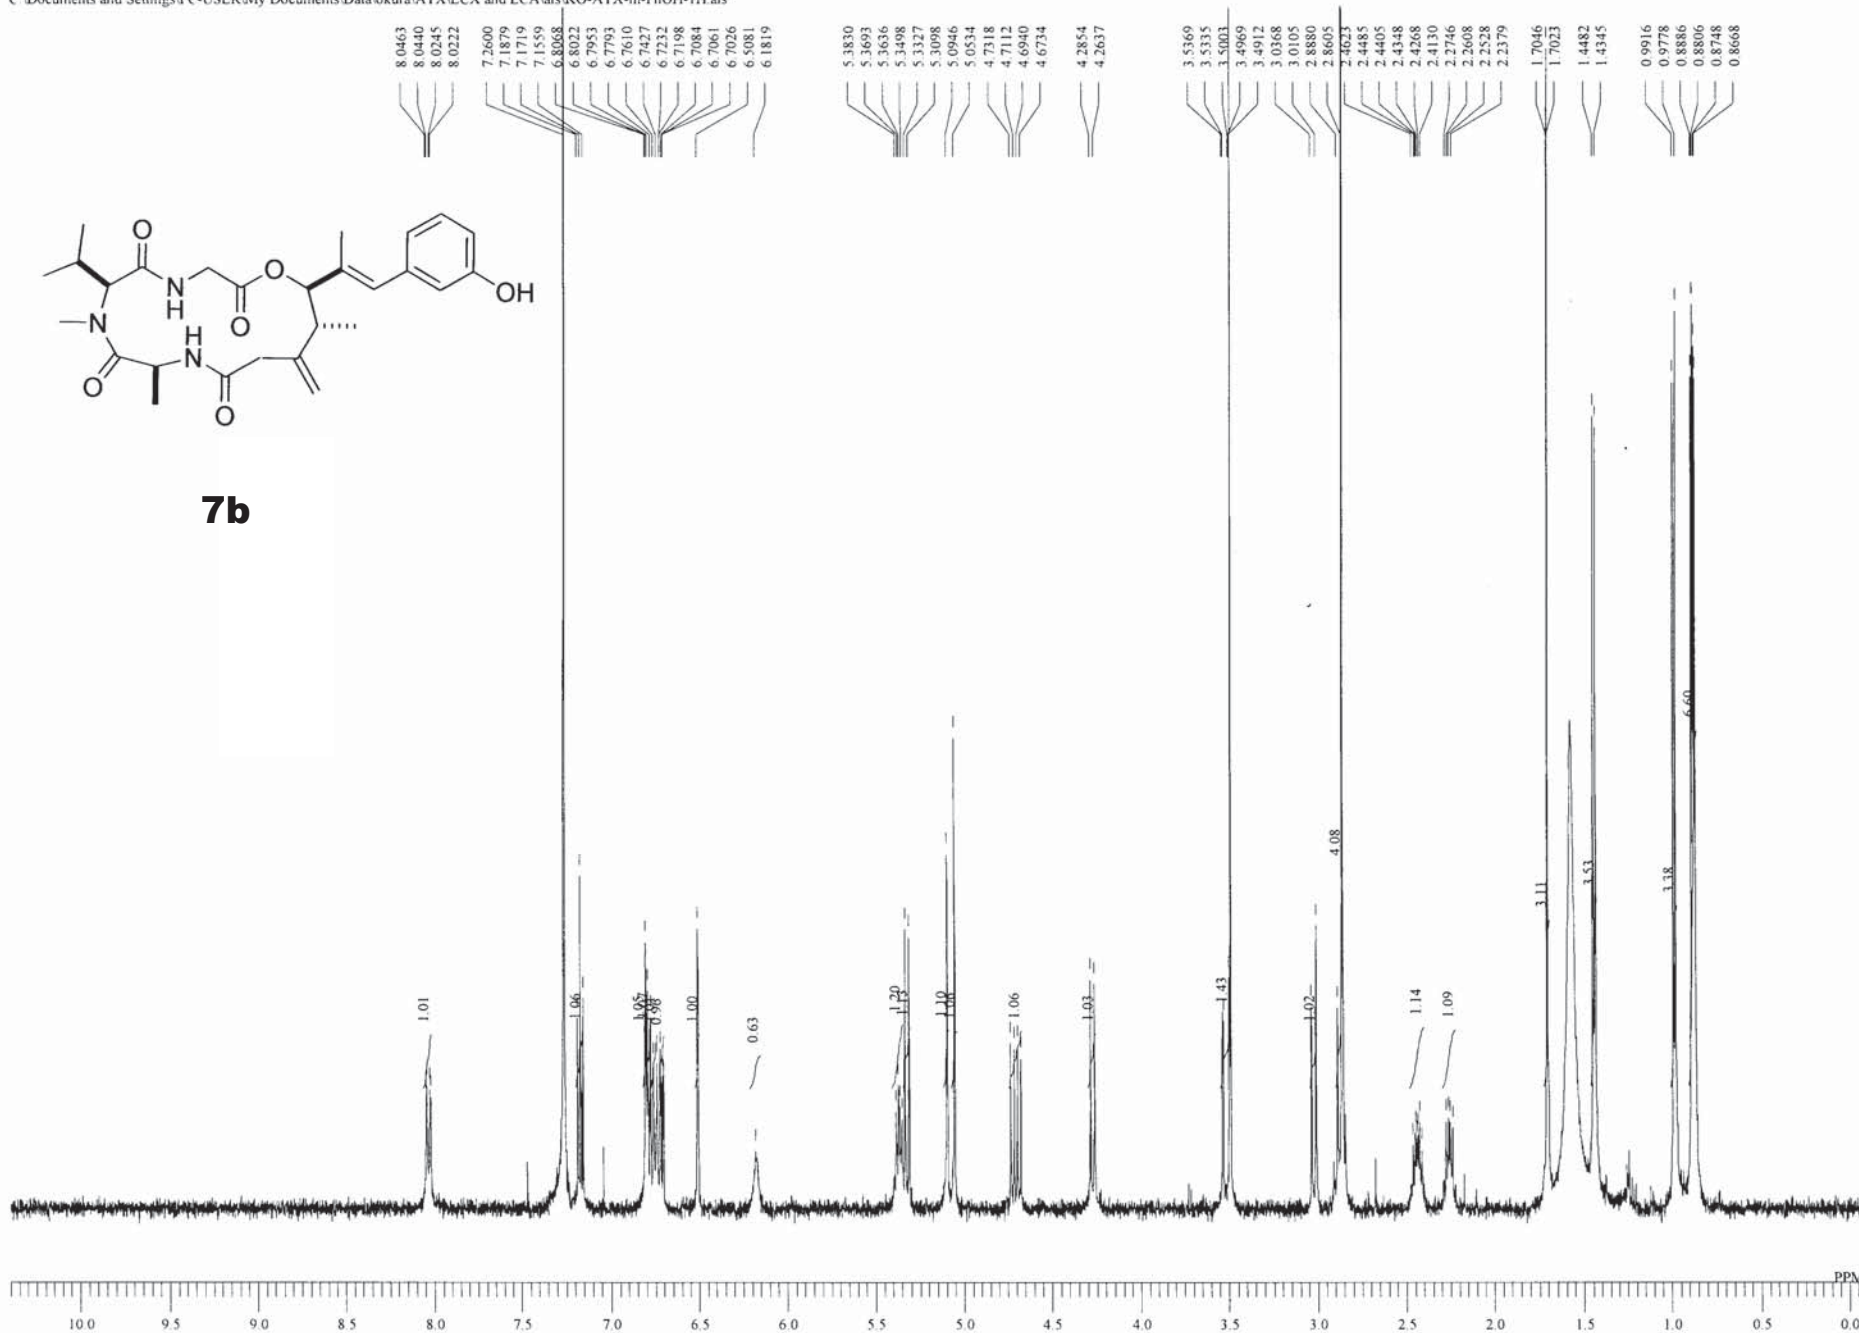

DATIM 02-03-2011 23:35:09  
 MENUF  
 OBNUC 1H  
 OFR 490.15 MHz  
 OBSSET 9.16 KHz  
 OFBIN 7.60 Hz  
 PW1 8.55 usec  
 DEADT 0.00 usec  
 PREDL 0.00000 msec  
 IWT 1.0000 sec  
 POINT 13107  
 SPO 13107  
 TIMES 8  
 DUMMY 1  
 FREQU 7352.83 Hz  
 FLT 37000 Hz  
 DELAY 13.52 usec  
 ACQTM 1.7826 sec  
 PD 1.5000 sec  
 ADBIT 16  
 RGAIN 48  
 BF 0.01 Hz  
 T1 0.00  
 T2 0.00  
 T3 90.00  
 T4 100.00  
 EXMOD single\_pulse ex2  
 EXPCM  
 IRNUC 1H  
 IFR 490.15 MHz  
 IRSET 9.16 KHz  
 IRFIN 7.60 Hz  
 IRRPW 118 usec  
 IRATN 79  
 DFILE KO-ATX-m-PhOH-1H.als  
 SF  
 LKSET 70.30 KHz  
 LKFIN 32.5 Hz  
 LKLEV 0  
 LGAIN 0  
 LKPHS 0  
 LKSIG 0  
 CSPED 0 Hz  
 FILDC  
 FILDF

C:\Documents and Settings\PC-USER\My Documents\Data\okura\ATX\ECX and ECA\als\KO-ATX-m-PhOH-13C.als

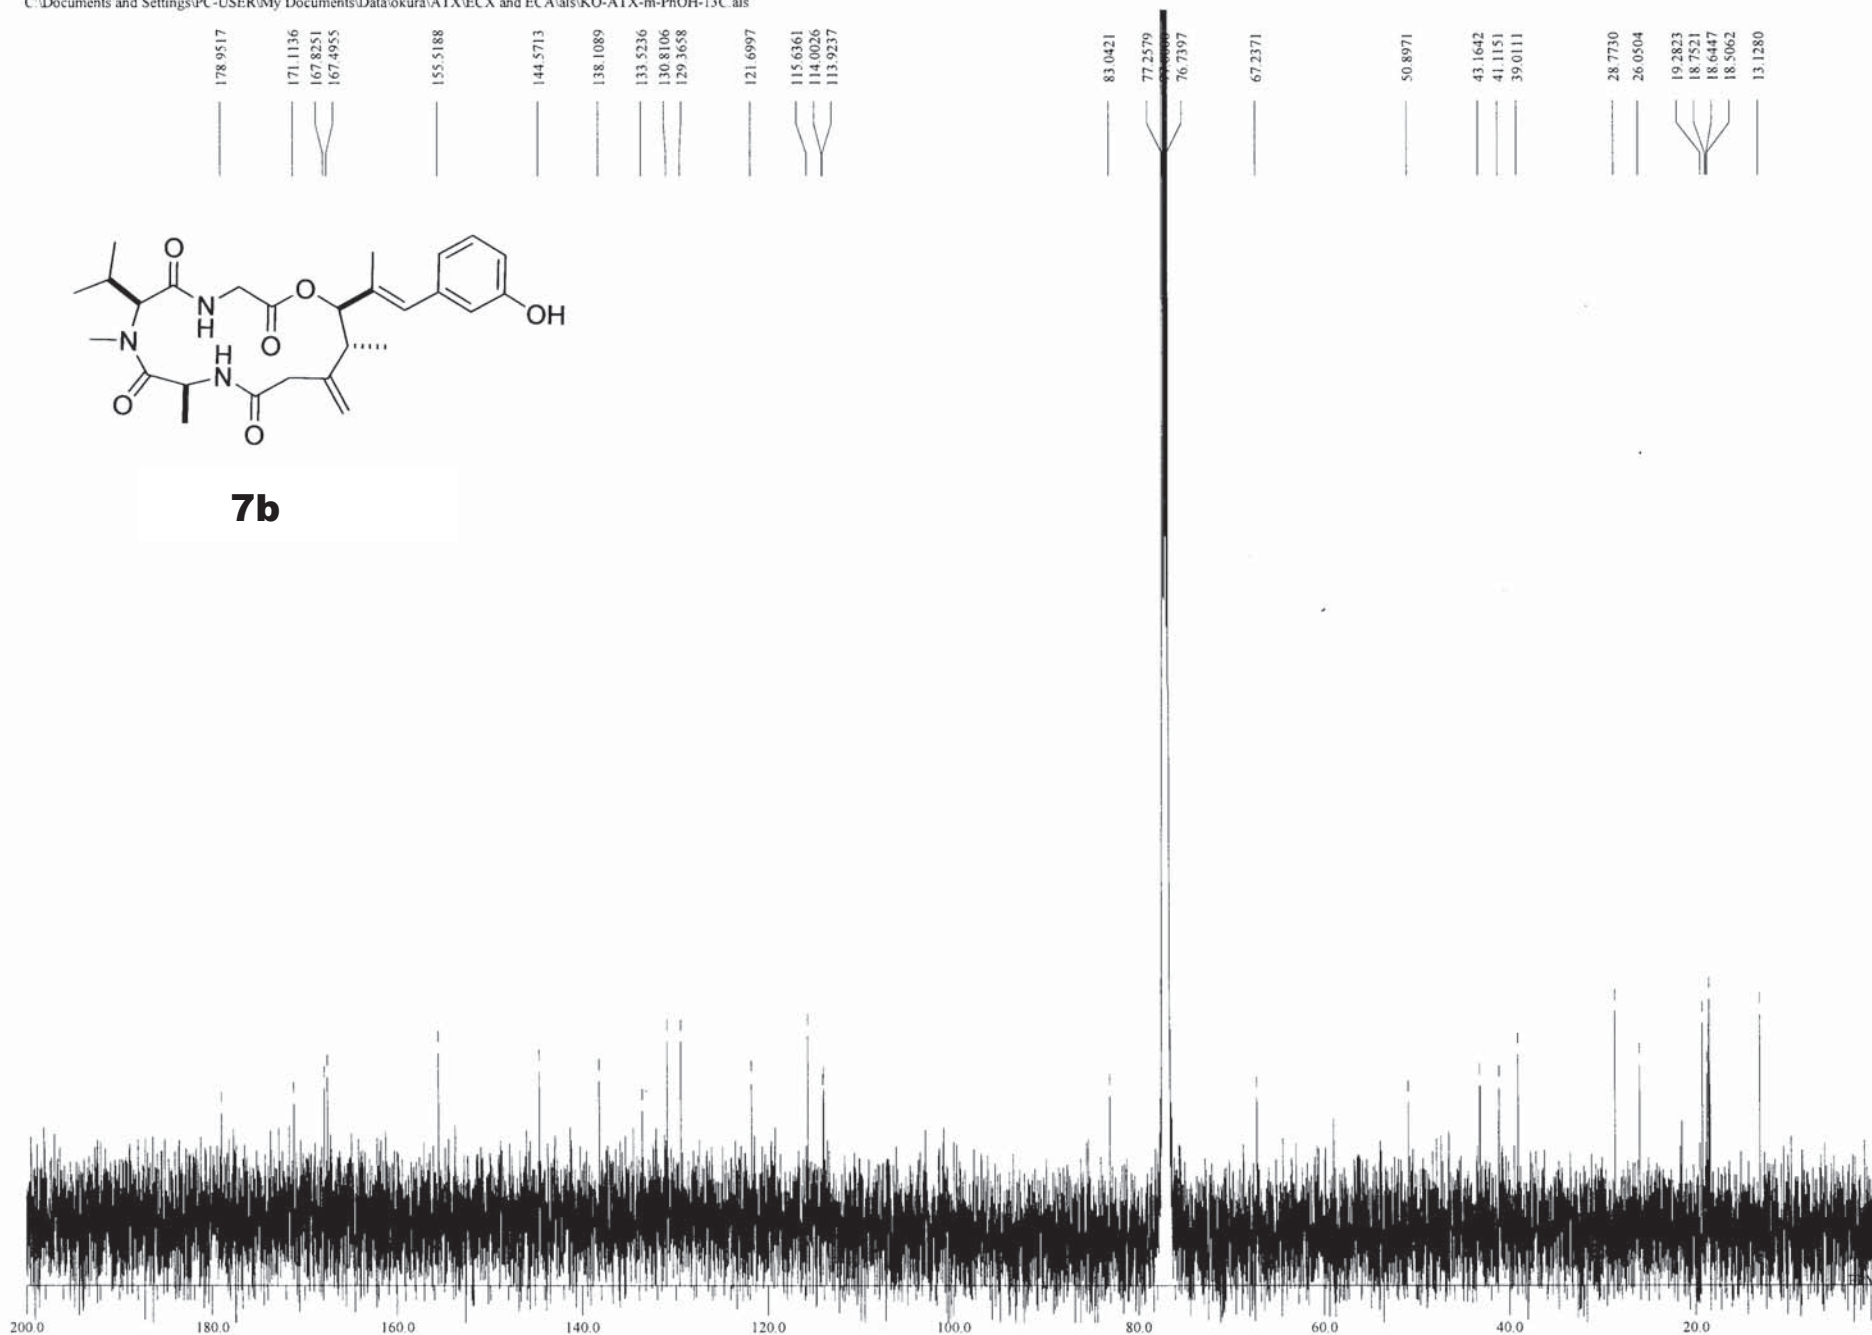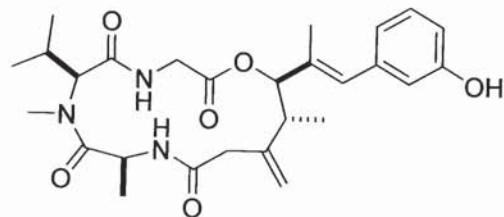

**7b**

DATIM 03-03-2011 08:59:54  
 MENUF  
 OBNUC 13C  
 OFR 123.26 MHz  
 OBSET 2.31 KHz  
 OFBIN 6.71 Hz  
 PW1 3.20 usec  
 DEADT 0.00 usec  
 PREDL 0.00000 msec  
 IWT 1.0000 sec  
 POINT 104856  
 SPO 104856  
 TIMES 3072  
 DUMMY 4  
 FREQU 30863.73 Hz  
 FLT 155000 Hz  
 DELAY 21.06 usec  
 ACQTM 0.8493 sec  
 PD 10.0000 sec  
 ADBIT 16  
 RGAIN 60  
 BF 1.00 Hz  
 T1 0.00  
 T2 0.00  
 T3 90.00  
 T4 100.00  
 EXMOD single\_pulse\_dec  
 EXPCM  
 IRNUC 1H  
 IFR 490.15 MHz  
 IRSET 9.16 KHz  
 IRFIN 7.60 Hz  
 IRRPW 92 usec  
 IRATN 79  
 DFILE KO-ATX-m-PhOH-13C.a  
 SF  
 LKSET 70.30 KHz  
 LKFIN 32.5 Hz  
 LKLEV 0  
 LGAIN 0  
 LKPHS 0  
 LKSIG 0  
 CSPED 0 Hz  
 FILDC  
 FILDF

C:\Documents and Settings\PC-USER\My Documents\Data\okura\ATX\ECX and ECA\als\KO-ATX-p-PhOH-1H.als

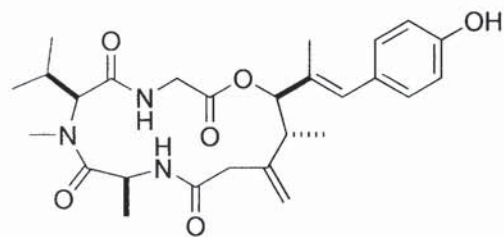

**7c**

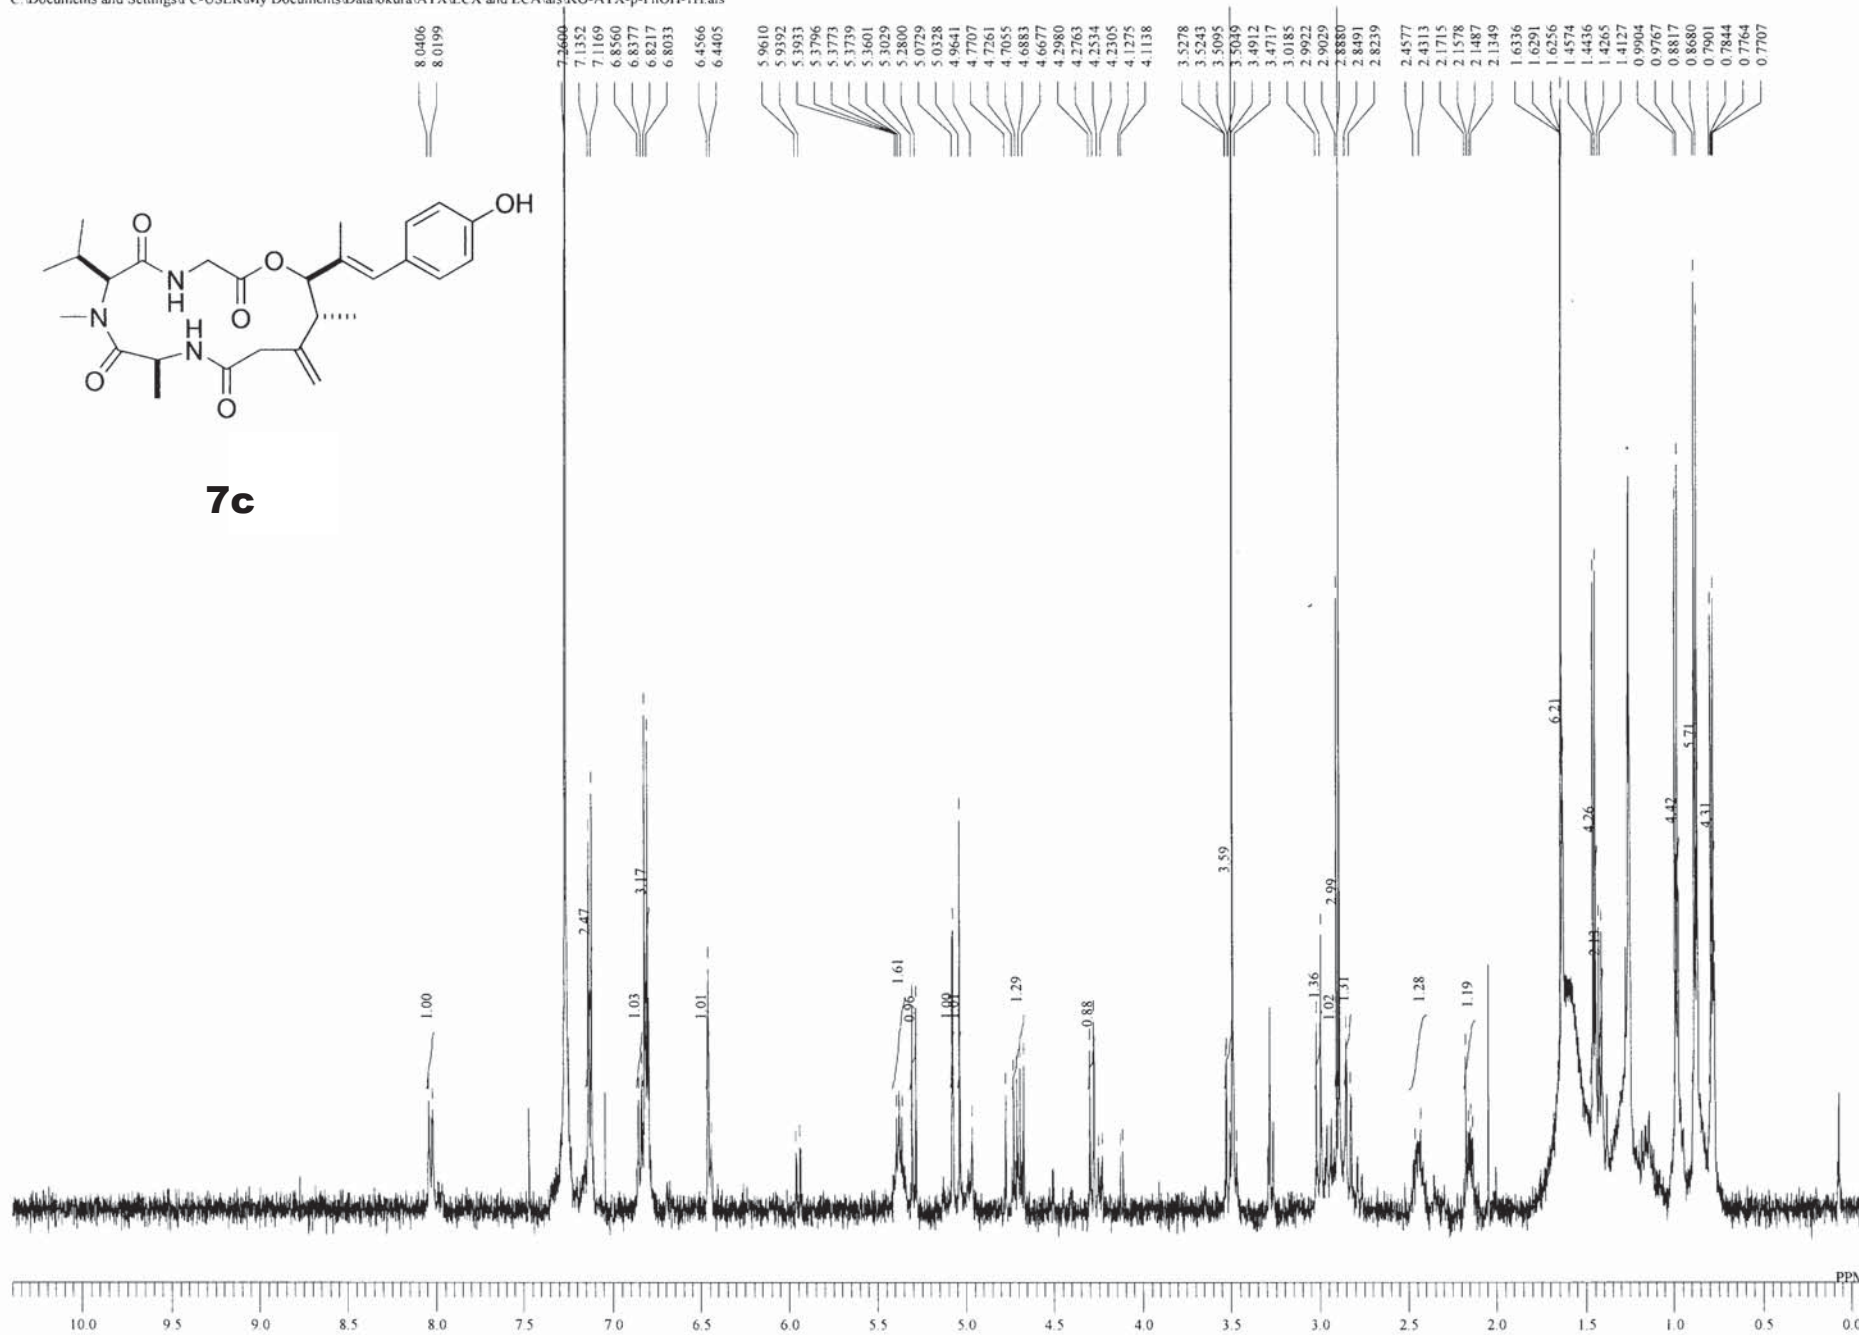

DATIM 04-03-2011 00:08:14  
 MENUF  
 OBNUC 1H  
 OFR 490.15 MHz  
 OBSET 9.16 KHz  
 OFBIN 7.60 Hz  
 PW1 8.55 usec  
 DEADT 0.00 usec  
 PREDL 0.00000 msec  
 IWT 1.0000 sec  
 POINT 13107  
 SPO 13107  
 TIMES 8  
 DUMMY 1  
 FREQU 7352.83 Hz  
 FLT 37000 Hz  
 DELAY 13.52 usec  
 ACQTM 1.7826 sec  
 PD 1.5000 sec  
 ADBIT 16  
 RGAIN 48  
 BF 0.01 Hz  
 T1 0.00  
 T2 0.00  
 T3 90.00  
 T4 100.00  
 EXMOD single\_pulse ex2  
 EXPCM  
 IRNUC 1H  
 IFR 490.15 MHz  
 IRSET 9.16 KHz  
 IRFIN 7.60 Hz  
 IRRPW 118 usec  
 IRATN 79  
 DFILE KO-ATX-p-PhOH-1H.als  
 SF  
 LKSET 70.30 KHz  
 LKFIN 32.5 Hz  
 LKLEV 0  
 LGAIN 0  
 LKPHS 0  
 LKSIG 0  
 CSPED 0 Hz  
 FILDC  
 FILDF

C:\Documents and Settings\PC-USER\My Documents\Data\okura\ATX\ECX and ECA\als\KO-ATX-o-CHO-1H.als

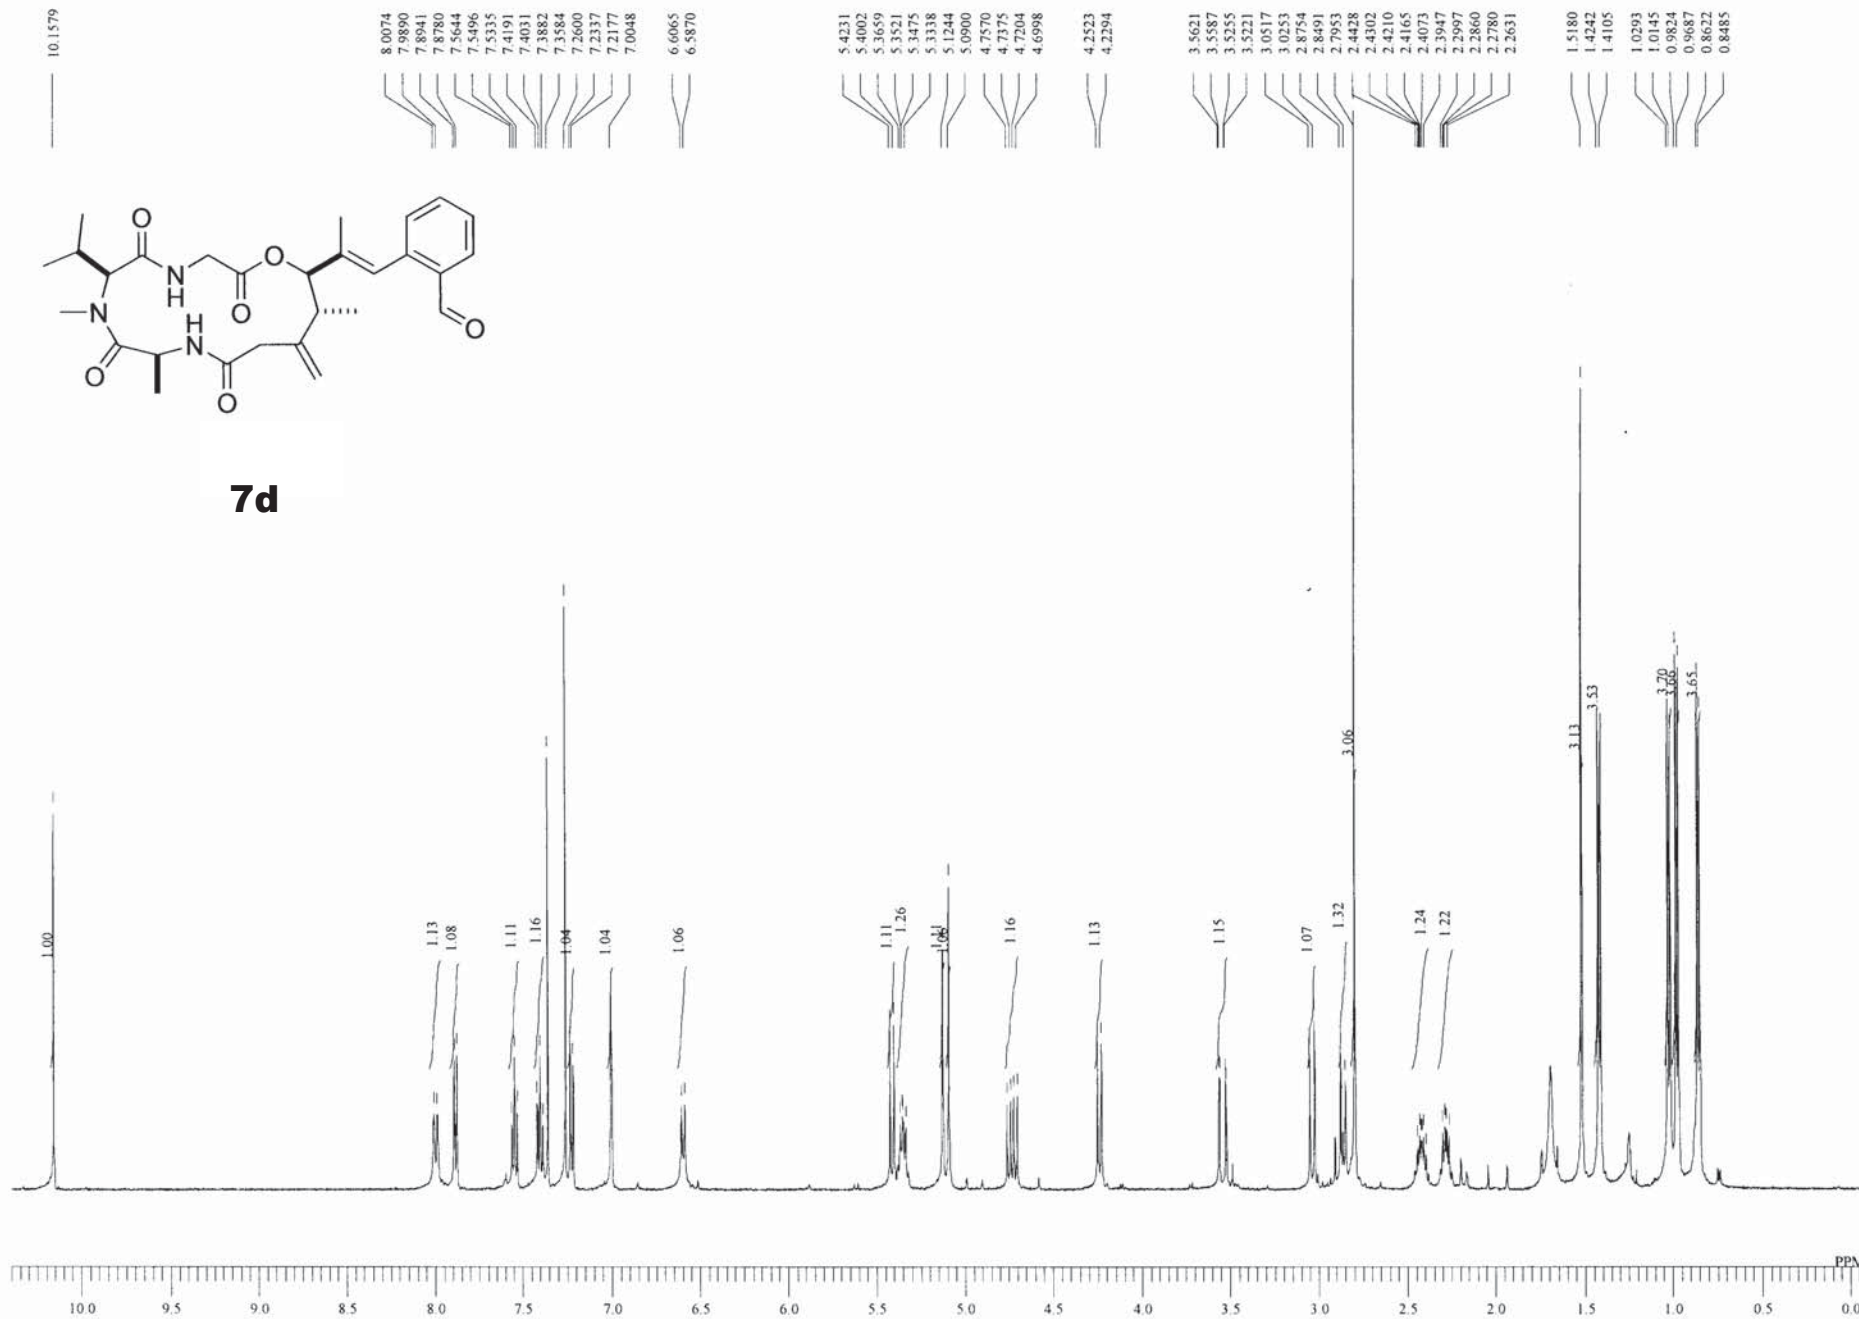

|       |                     |
|-------|---------------------|
| DATIM | 06-03-2011 22:29:49 |
| MENUP |                     |
| OBNUC | <sup>1</sup> H      |
| OFR   | 490.15 MHz          |
| OBSET | 9.16 KHz            |
| OBFIN | 7.60 Hz             |
| PW1   | 8.55 usec           |
| DEADT | 0.00 usec           |
| PREDL | 0.00000 msec        |
| IWT   | 1.0000 sec          |
| POINT | 13107               |
| SPO   | 13107               |
| TIMES | 8                   |
| DUMMY | 1                   |
| FREQU | 7352.83 Hz          |
| FLT   | 37000 Hz            |
| DELAY | 13.52 usec          |
| ACQTM | 1.7826 sec          |
| PD    | 1.5000 sec          |
| ADBIT | 16                  |
| RGAIN | 44                  |
| BF    | 0.01 Hz             |
| T1    | 0.00                |
| T2    | 0.00                |
| T3    | 90.00               |
| T4    | 100.00              |
| EXMOD | single_pulse ex2    |
| EXPCM |                     |
| IRNUC | <sup>1</sup> H      |
| IFR   | 490.15 MHz          |
| IRSET | 9.16 KHz            |
| IRFIN | 7.60 Hz             |
| IRRPW | 118 usec            |
| IRATN | 79                  |
| DFILE | KO-ATX-o-CHO-1H.als |
| SF    |                     |
| LKSET | 70.30 KHz           |
| LKFIN | 32.5 Hz             |
| LKLEV | 0                   |
| LGAIN | 0                   |
| LKPHS | 0                   |
| LKSIG | 0                   |
| CSPED | 0 Hz                |
| FILDC |                     |
| FILDF |                     |

C:\Documents and Settings\PC-USER\My Documents\Data\okura\ATX\ECX and ECA\als\KO-ATX-o-CHO-13C.als

DATIM 07-03-2011 08:00:34  
 MENUF  
 OBNUC 13C  
 OFR 123.26 MHz  
 OBSET 2.31 KHz  
 OFBIN 6.71 Hz  
 PW1 3.20 usec  
 DEADT 0.00 usec  
 PREDL 0.00000 msec  
 IWT 1.0000 sec  
 POINT 26214  
 SPO 26214  
 TIMES 3072  
 DUMMY 4  
 FREQU 30863.73 Hz  
 FLT 155000 Hz  
 DELAY 21.06 usec  
 ACQTM 0.8493 sec  
 PD 10.0000 sec  
 ADBIT 16  
 RGAIN 60  
 BF 1.00 Hz  
 T1 0.00  
 T2 0.00  
 T3 90.00  
 T4 100.00  
 EXMOD single\_pulse\_dec  
 EXPCM  
 IRNUC 1H  
 IFR 490.15 MHz  
 IRSET 9.16 KHz  
 IRFIN 7.60 Hz  
 IRRPW 92 usec  
 IRATN 79  
 DFILE KO-ATX-o-CHO-13C.als  
 SF  
 LKSET 70.30 KHz  
 LKFIN 32.5 Hz  
 LKLEV 0  
 LGAIN 0  
 LKPHS 0  
 LKSIG 0  
 CSPED 0 Hz  
 FILDC  
 FILDF

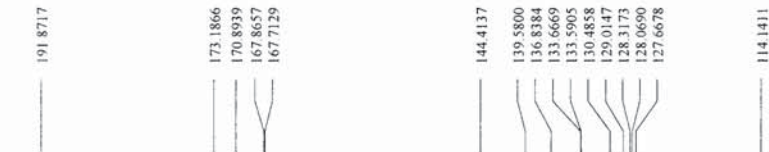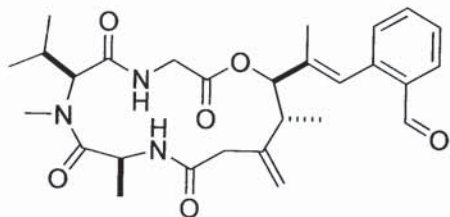

**7d**

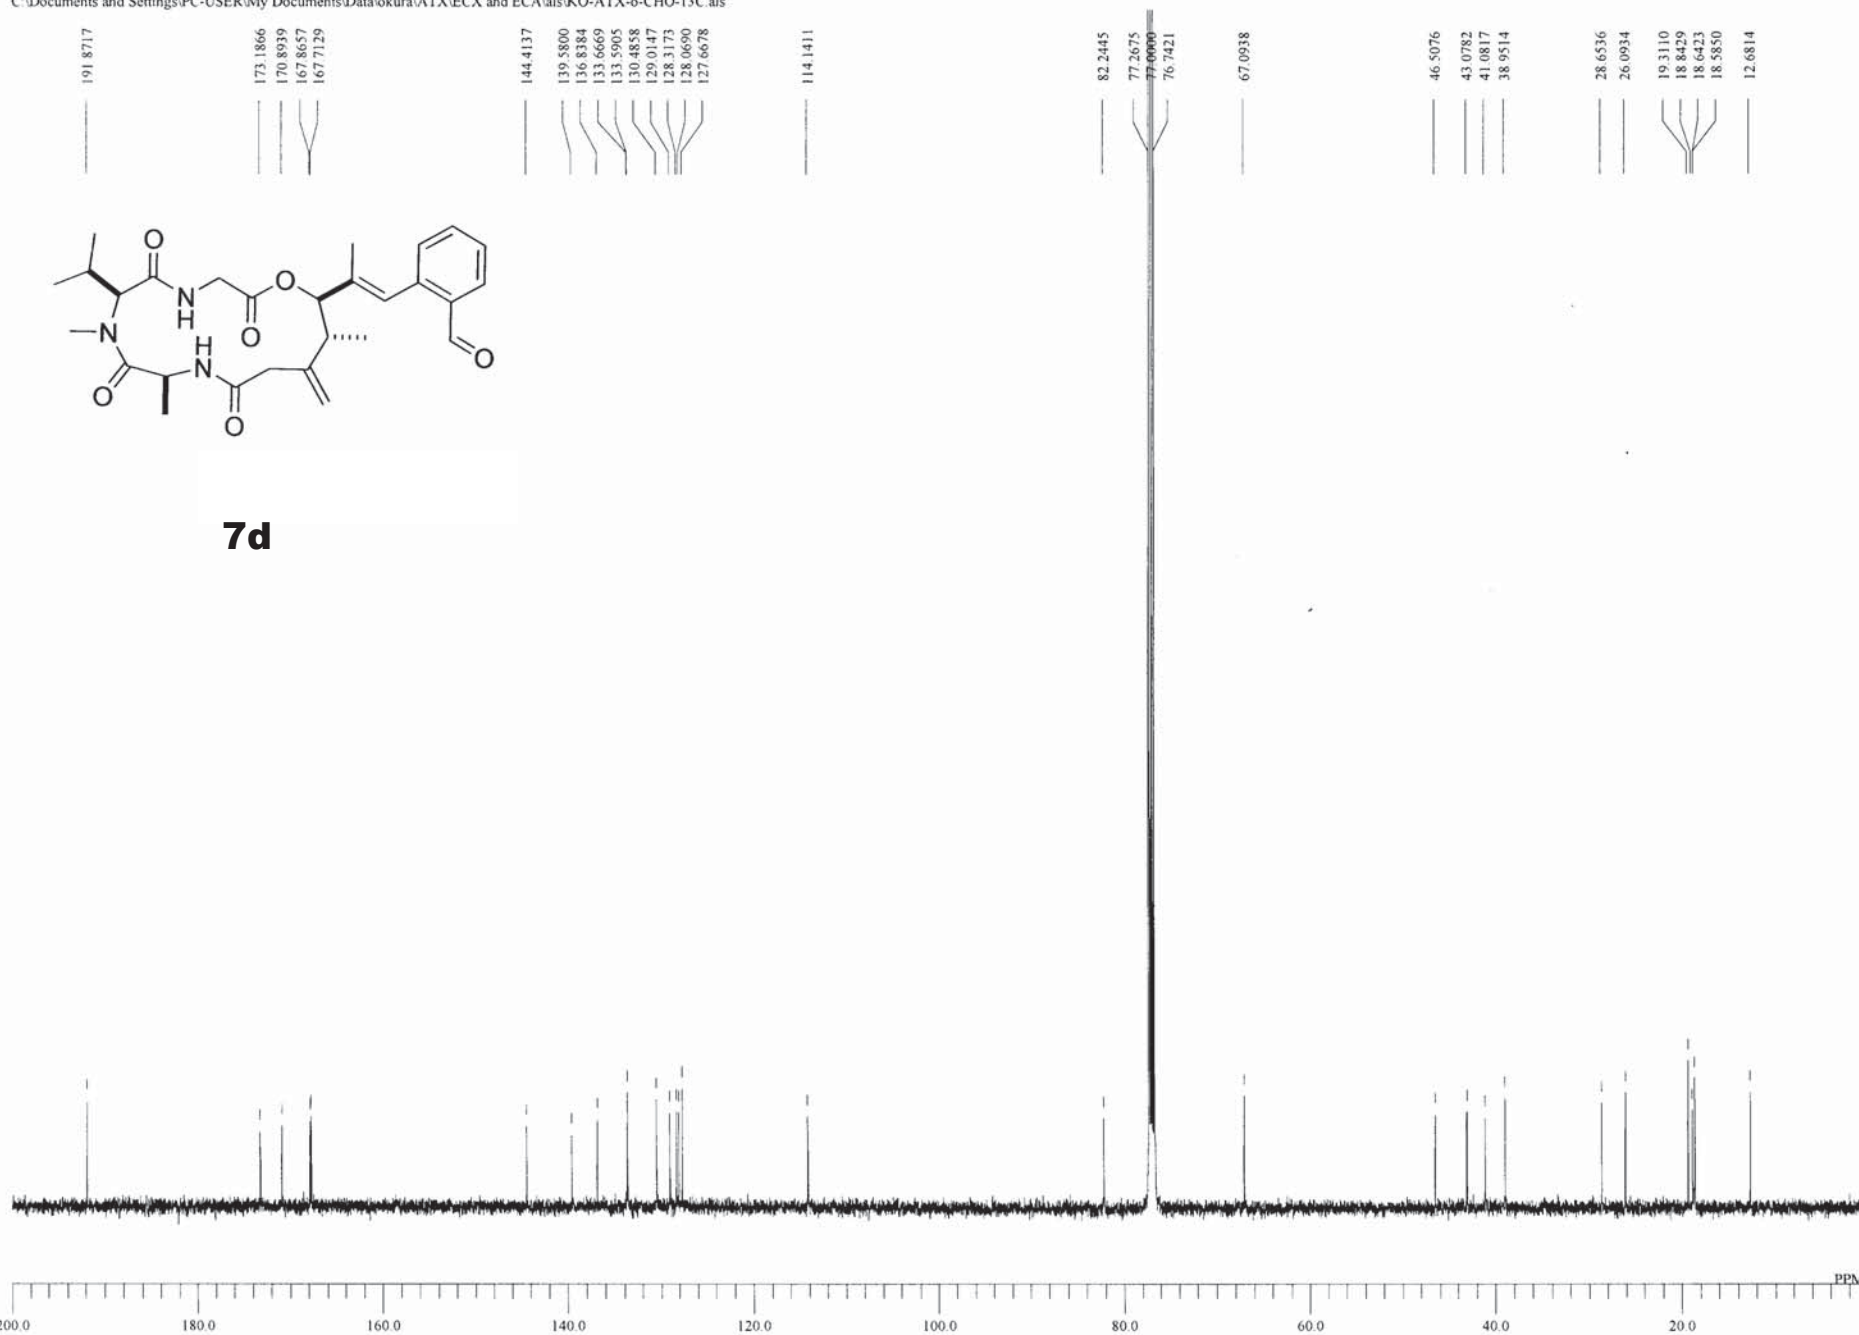



C:\Documents and Settings\PC-USER\My Documents\Data\okura\ATX\ECX and ECA\als\KO-ATX-m-CHO-1H.als

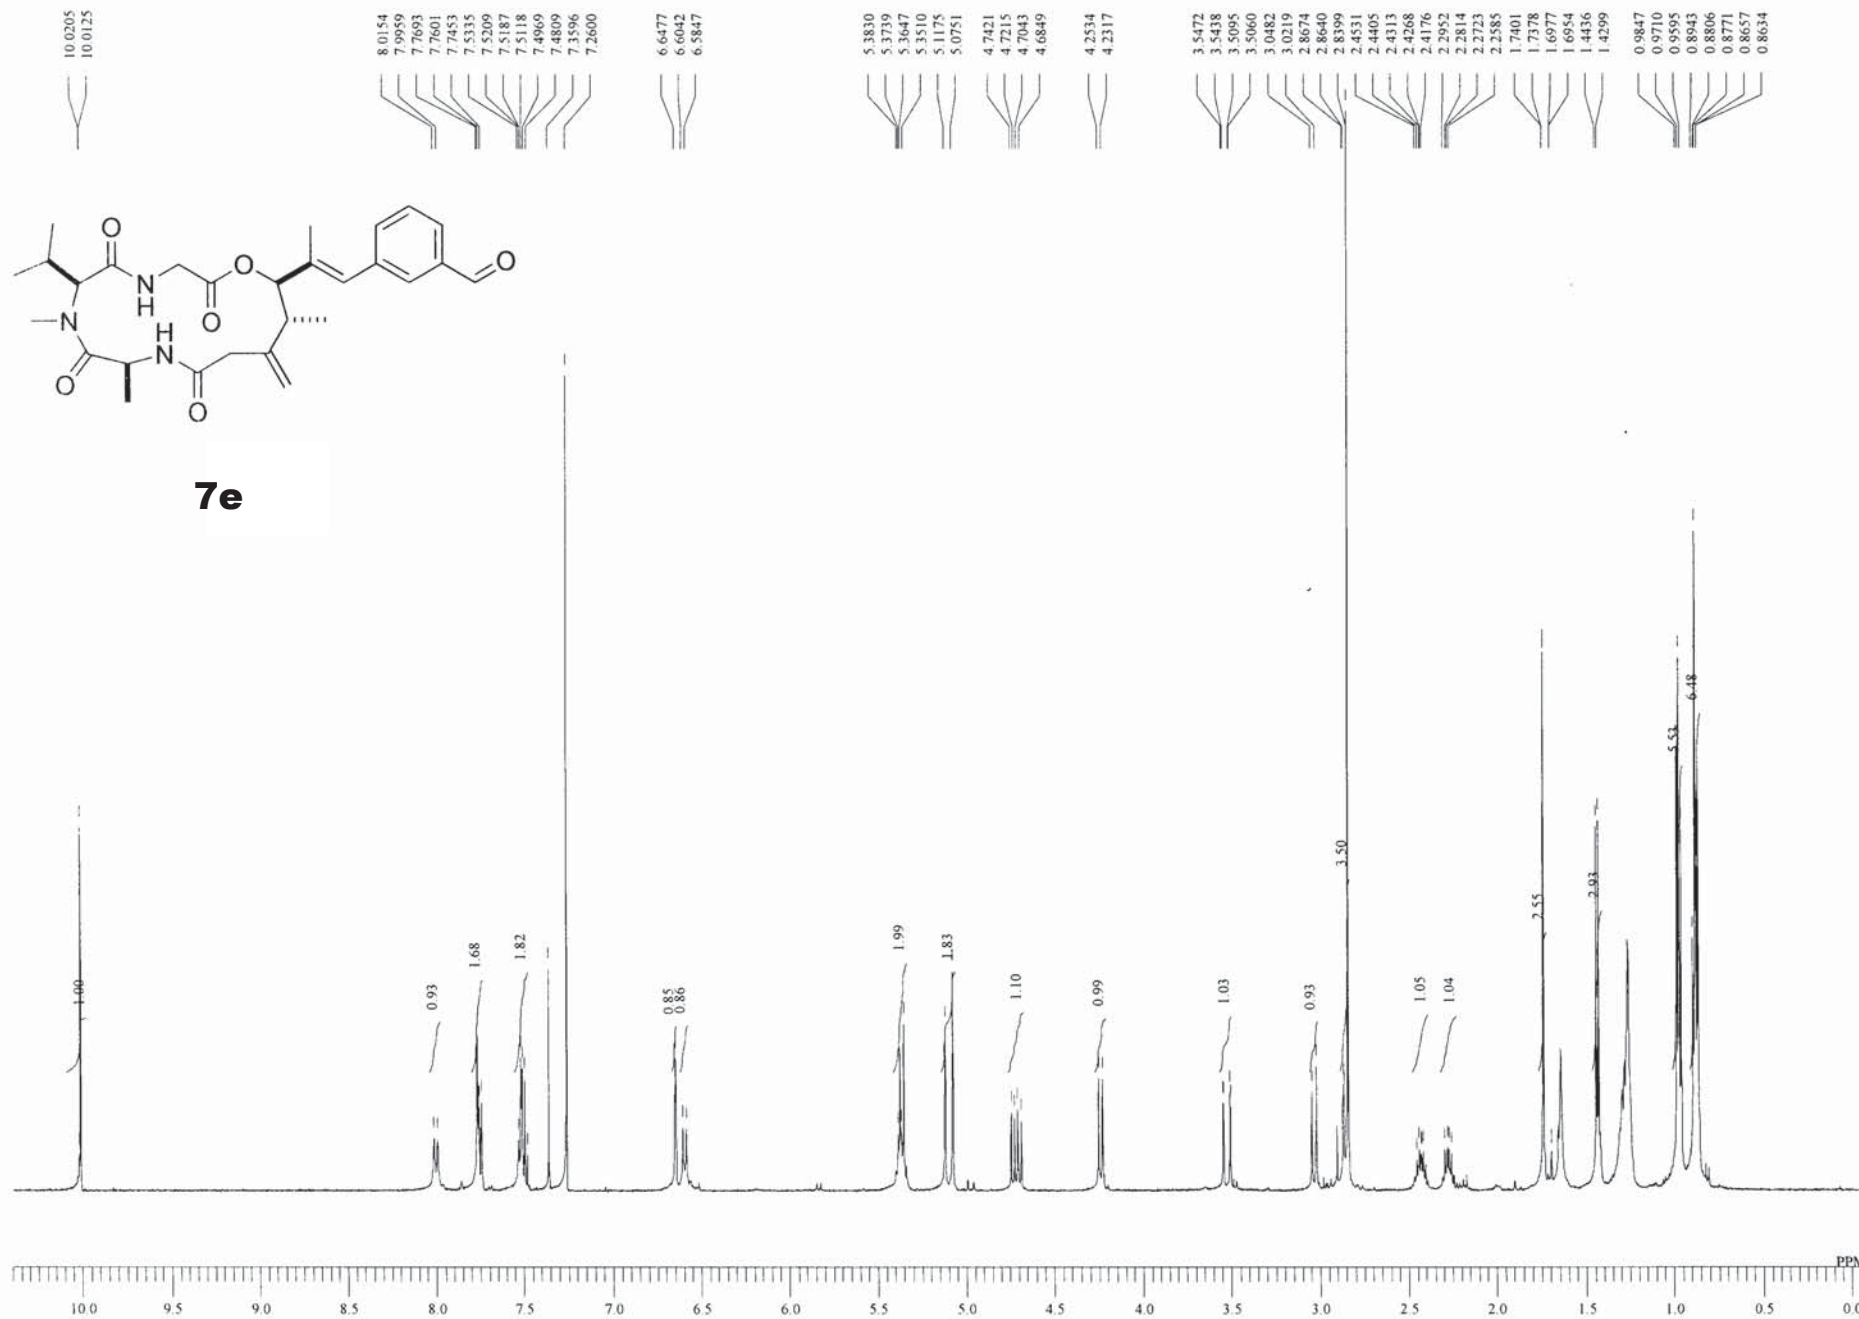

DATIM 30-01-2011 03:47:30  
 MENUF  
 OBNUC 1H  
 OFR 490.15 MHz  
 OBSET 9.16 KHz  
 OBFIN 7.60 Hz  
 PW1 8.55 usec  
 DEADT 0.00 usec  
 PREDL 0.00000 msec  
 IWT 1.0000 sec  
 POINT 13107  
 SPO 13107  
 TIMES 8  
 DUMMY 1  
 FREQU 7352.83 Hz  
 FLT 37000 Hz  
 DELAY 13.52 usec  
 ACQTM 1.7826 sec  
 PD 1.5000 sec  
 ADBIT 16  
 RGAIN 44  
 BF 0.01 Hz  
 T1 0.00  
 T2 0.00  
 T3 90.00  
 T4 100.00  
 EXMOD single\_pulse.ex2  
 EXPCM  
 IRNUC 1H  
 IFR 490.15 MHz  
 IRSET 9.16 KHz  
 IRFIN 7.60 Hz  
 IRRPW 118 usec  
 IRATN 79  
 DFILE KO-ATX-m-CHO-1H.als  
 SF  
 LKSET 70.30 KHz  
 LKFIN 32.5 Hz  
 LKLEV 0  
 LGAIN 0  
 LKPHS 0  
 LKSIG 0  
 CSPED 0 Hz  
 FILDC  
 FILDF

C:\Documents and Settings\PC-USER\My Documents\Data\okura\ATX\ECX and ECA\als\KO-ATX-m-CHO-13C.als

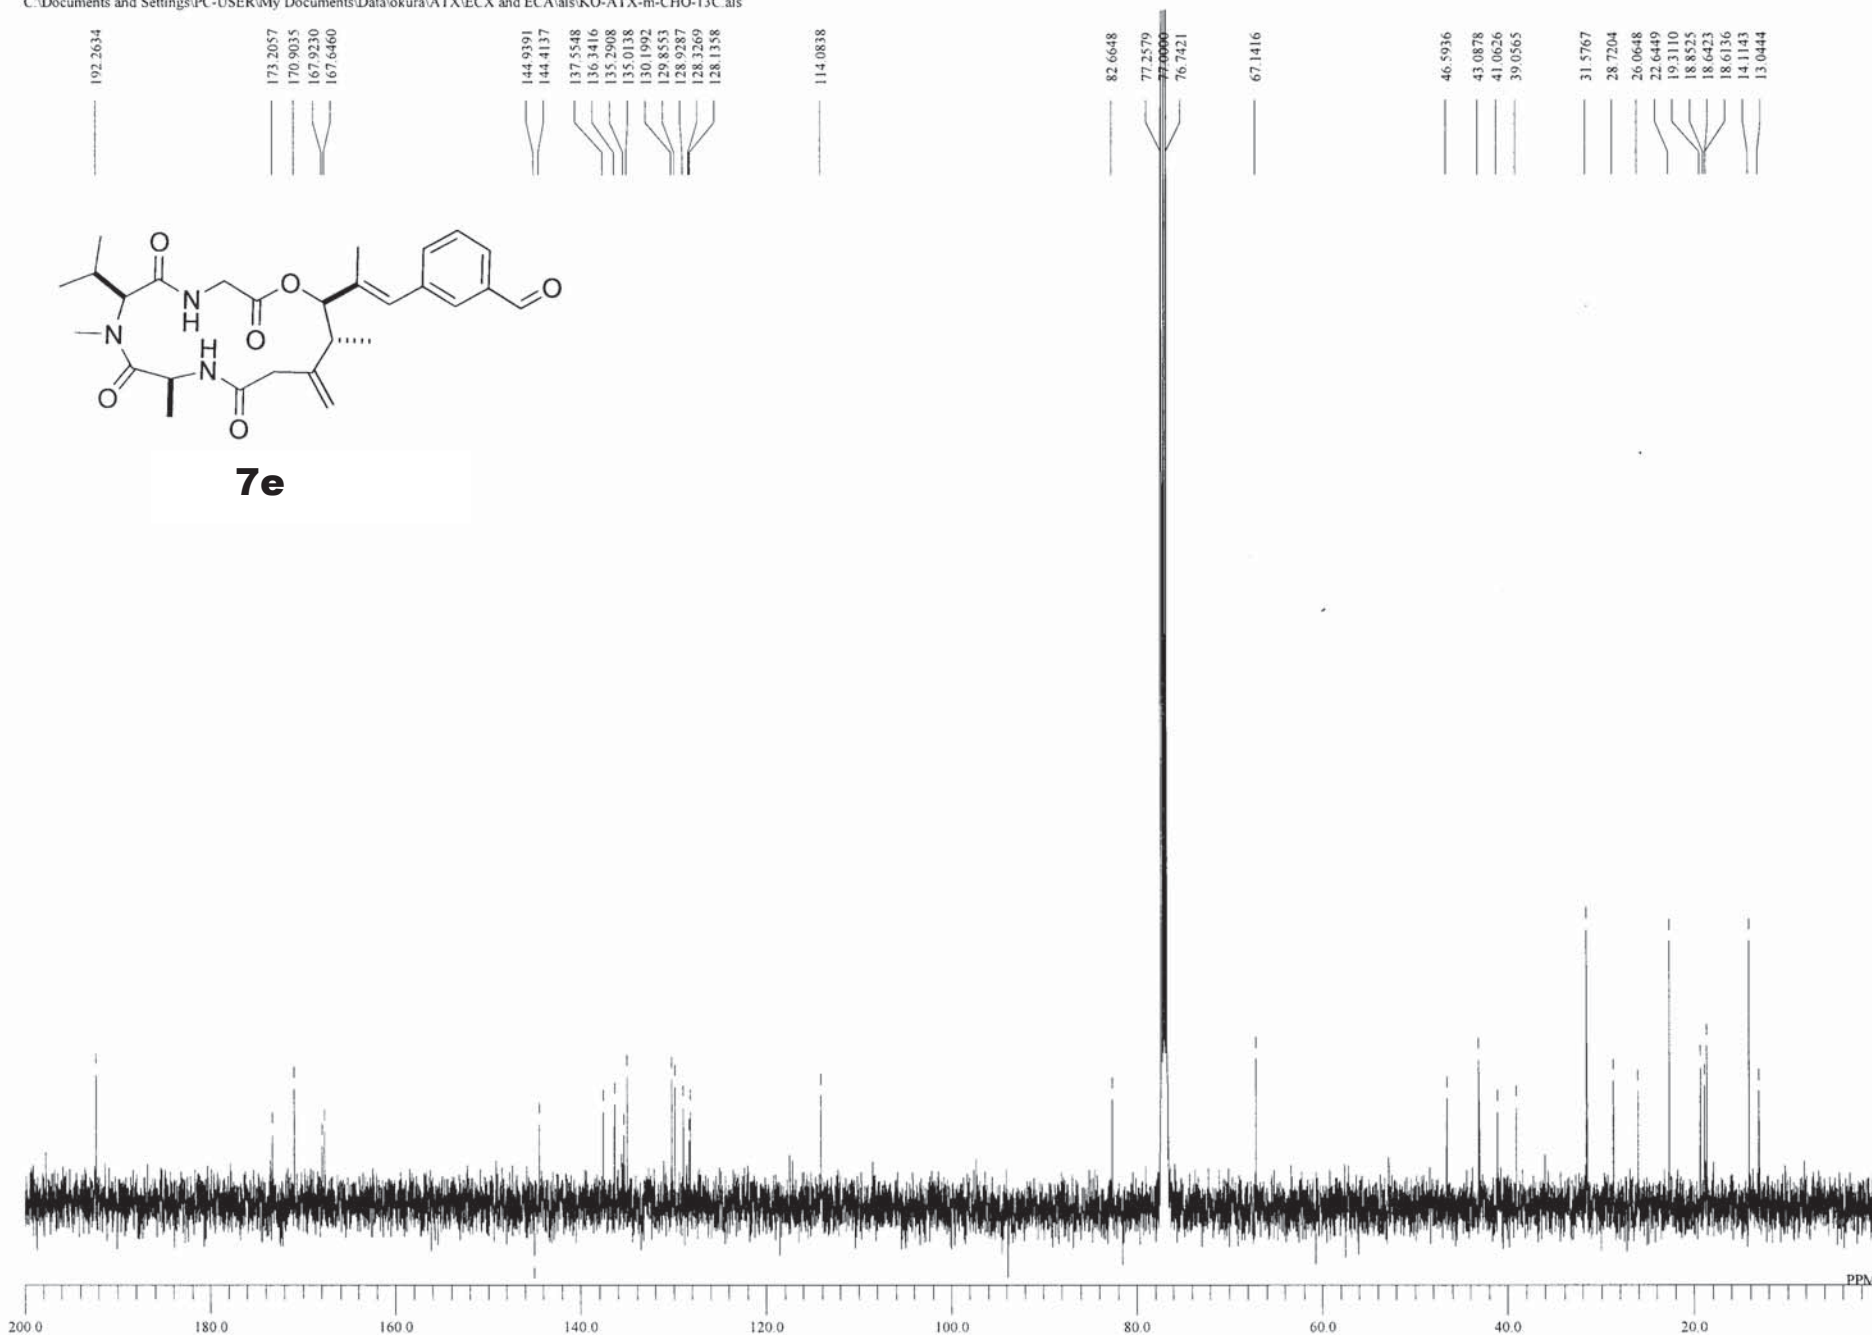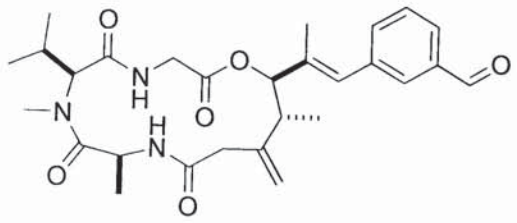

**7e**

DATIM 30-01-2011 06:56:44  
 MENUF  
 OBNUC 13C  
 OFR 123.26 MHz  
 OBSET 2.31 KHz  
 OFBIN 6.71 Hz  
 PWI 3.20 usec  
 DEADT 0.00 usec  
 PREDL 0.00000 msec  
 IWT 1.0000 sec  
 POINT 26214  
 SPO 26214  
 TIMES 1024  
 DUMMY 4  
 FREQU 30863.73 Hz  
 FLT 155000 Hz  
 DELAY 21.06 usec  
 ACQTM 0.8493 sec  
 PD 10.0000 sec  
 ADBIT 16  
 RGAIN 60  
 BF 1.00 Hz  
 T1 0.00  
 T2 0.00  
 T3 90.00  
 T4 100.00  
 EXMOD single\_pulse\_dec  
 EXPCM  
 IRNUC 1H  
 IFR 490.15 MHz  
 IRSET 9.16 KHz  
 IRFIN 7.60 Hz  
 IRRPW 92 usec  
 IRATN 79  
 DFILE KO-ATX-m-CHO-13C.als  
 SF  
 LKSET 70.30 KHz  
 LKFIN 32.5 Hz  
 LKLEV 0  
 LGAIN 0  
 LKPHS 0  
 LKSIG 0  
 CSPED 0 Hz  
 FILDC  
 FILDF

C:\Documents and Settings\PC-USER\My Documents\Data\okura\ATX\ECX and ECA\als\KO-ATX-p-aldehyde-1H.als

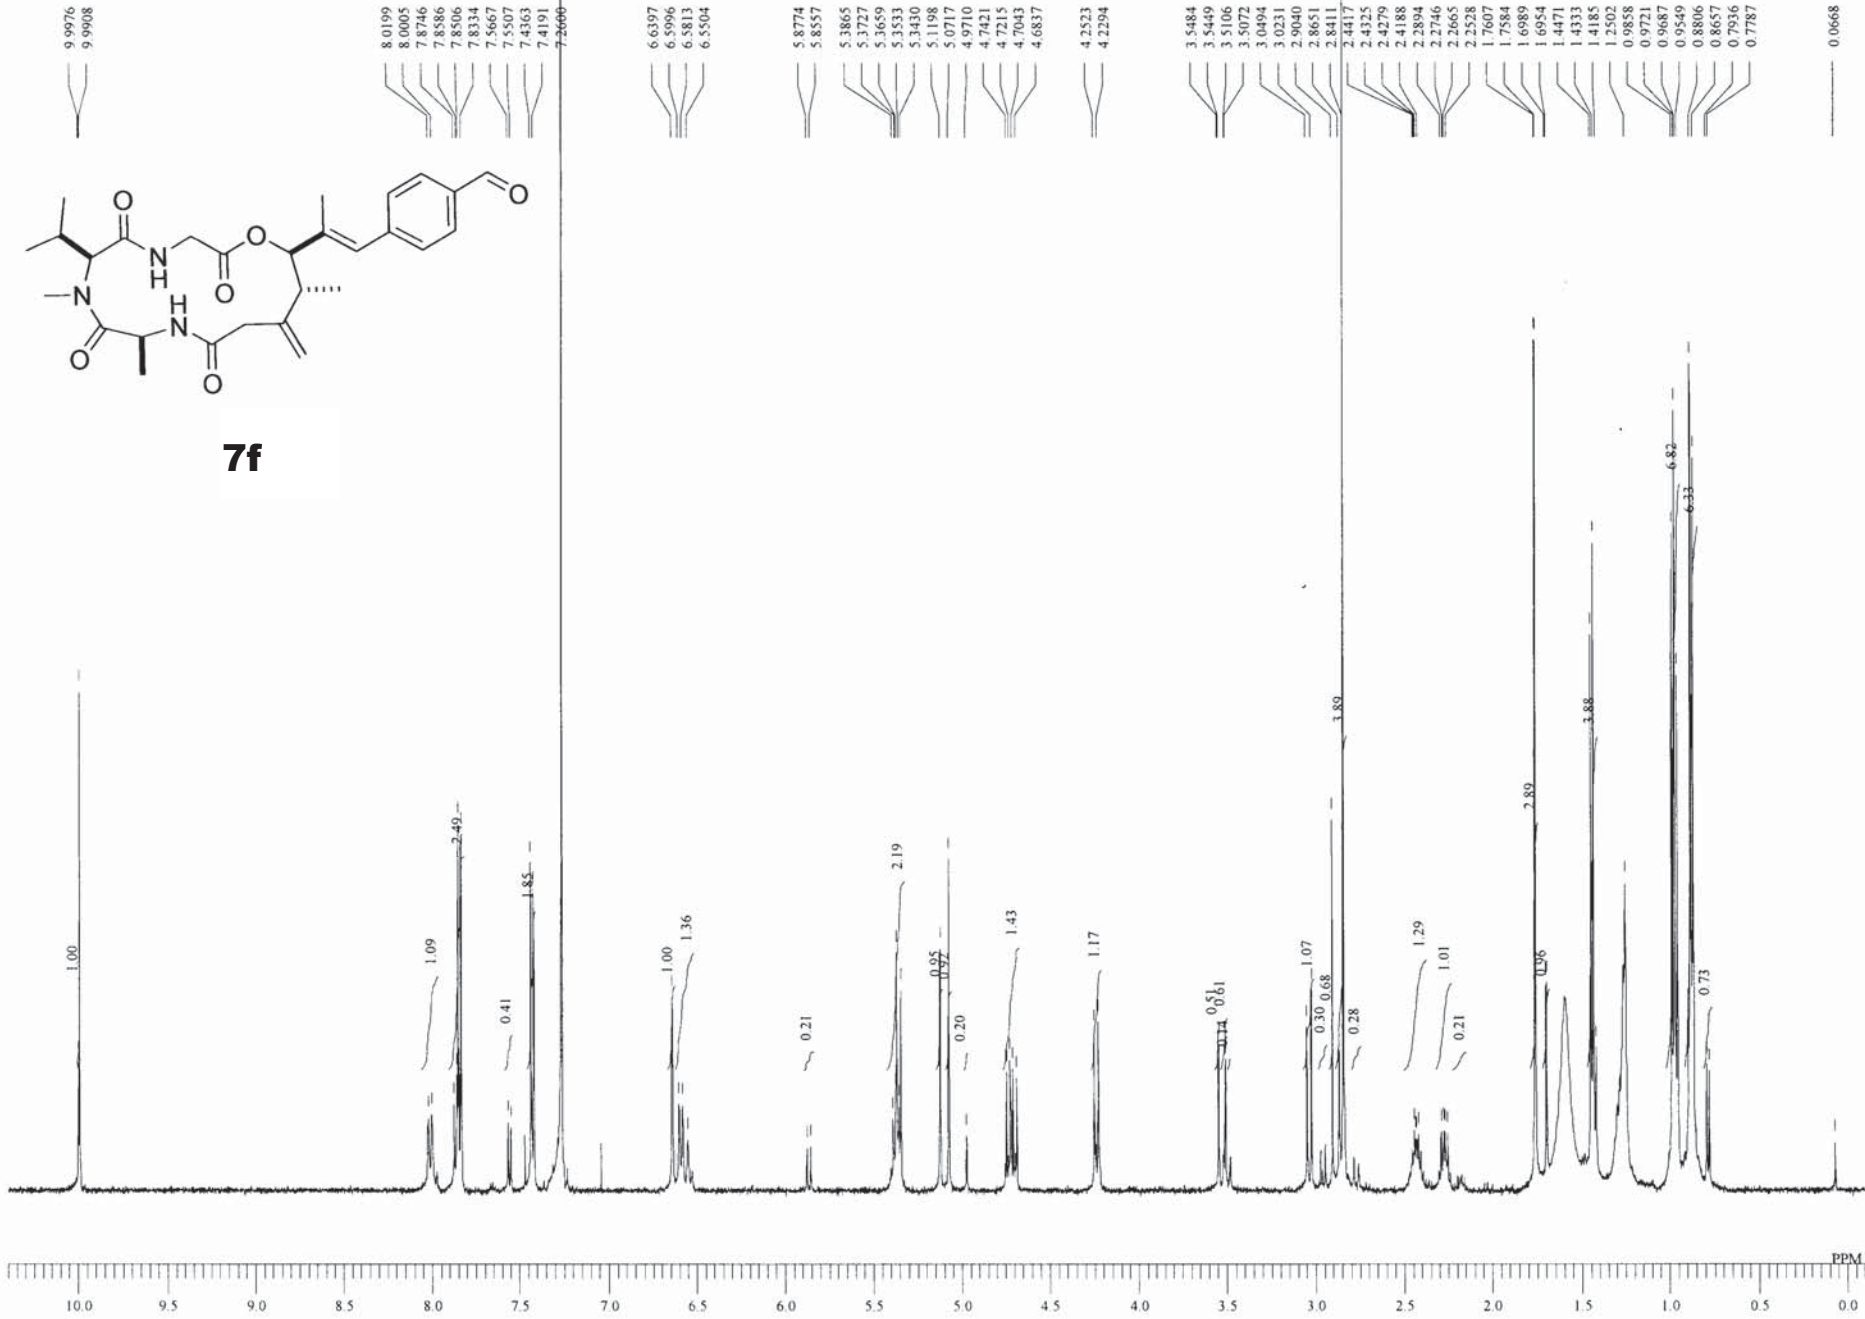

DATIM 05-01-2010 22:55:09  
MENUF 1H  
OBNUC 1H  
OFR 490.15 MHz  
OBSET 9.16 KHz  
OBFIN 7.60 Hz  
PWI 8.55 usec  
DEADT 0.00 usec  
PREDL 0.00000 msec  
IWT 1.0000 sec  
POINT 13107  
SPO 13107  
TIMES 32  
DUMMY 1  
FREQU 7352.83 Hz  
FLT 37000 Hz  
DELAY 13.52 usec  
ACQTM 1.7826 sec  
PD 1.5000 sec  
ADBIT 16  
RGAIN 48  
BF 0.01 Hz  
T1 0.00  
T2 0.00  
T3 90.00  
T4 100.00  
EXMOD single\_pulse.ex2  
EXPCM 1H  
IRNUC 1H  
IFR 490.15 MHz  
IRSET 9.16 KHz  
IRFIN 7.60 Hz  
IRRPW 118 usec  
IRATN 79  
DFILE KO-ATX-p-aldehyde-1H:  
SF 70.30 KHz  
LKSET 32.5 Hz  
LKFIN 0  
LKLEV 0  
LGAIN 0  
LKPHS 0  
LKSIG 0  
CSPED 0 Hz  
FILDC  
FILDF
